# Supplementary material for: Ligand-enabled silver-catalyzed carbene insertion into the N–H bond of aliphatic and electron-rich aromatic amines
Source: Royal Society of Chemistry journal article supplement (doi:10.1039/d3qo00156c), 2023-01-01

*Supplementary Information for*

**Ligand-Enabled Silver-Catalyzed Carbene Insertion into N–H Bond of Aliphatic and Electron-rich Aromatic Amines**

Linxuan Li,<sup>a</sup> Paramasivam Sivaguru,<sup>a</sup> Xinyue Han,<sup>a</sup> Swastik Karmakar<sup>b</sup> and Xihe Bi<sup>\*a,c</sup>

<sup>a</sup> Department of Chemistry, Northeast Normal University, Changchun 130024, China.

<sup>b</sup> Department of Chemistry, Basirhat College, West Bengal State University, Basirhat-743412, West Bengal, India.

<sup>c</sup> State Key Laboratory of Elemento-Organic Chemistry, Nankai University, Tianjin 300071, China.

E-mail: bixh507@nenu.edu.cn

**Table of Contents**

|                                                                                  |    |
|----------------------------------------------------------------------------------|----|
| 1. General Information.....                                                      | 1  |
| 2. Experimental Procedure.....                                                   | 2  |
| 3. Computational Details.....                                                    | 12 |
| 4. X-ray Crystallographic Data of Complex A.....                                 | 36 |
| 5. Characterization Data for the Products.....                                   | 37 |
| 6. References.....                                                               | 55 |
| 7. Copies of <sup>1</sup> H-, <sup>13</sup> C- and <sup>19</sup> F- Spectra..... | 57 |

## 1. General information

**General.** All reactions dealing with air- or moisture-sensitive compounds were carried out in a flame-dried, sealed Schlenk reaction tube under an atmosphere of argon. Analytical thin-layer chromatography was performed on glass plates coated with 0.25 mm 230-400 mesh silica gel containing a fluorescent indicator (Merck). Flash silica gel column chromatography was performed on silica gel 60N (spherical and neutral, 140-325 mesh) as described by Still. NMR spectra were measured on a Varian I NOVA 500 or Bruker AV-600 spectrometer and reported in parts per million. The  $^1\text{H}$  NMR (500 MHz or 600 MHz) chemical shifts were measured relative to TMS, DMSO or  $\text{CDCl}_3$  as the internal reference. The  $^{13}\text{C}$  NMR (125 MHz or 150 MHz) chemical shifts are given using  $\text{CDCl}_3$  and DMSO as the internal standard. High resolution mass spectra (HRMS) were recorded on the Exactive Mass Spectrometer (Agilent 1200HPLC/MicrOTOF II) equipped with ESI ionization source. Melting points were determined with XRC-1 and are uncorrected.

**Materials.** Unless otherwise noted, materials were purchased from Tokyo Chemical Industry Co., Aldrich Inc., Alfa Aesar, and other commercial suppliers and used as received. Solvents were dried over  $\text{CaH}_2$  (for DCE  $\text{CHCl}_3$  and DMF) or sodium (for toluene and 1,4-dioxane) by refluxing for overnight and freshly distilled prior to use.

## 2. Experimental Procedure

### 2.1 Optimization of the reaction conditions

**Table S1.** Optimization of the reaction conditions with diazoes and aliphatic amines<sup>a</sup>

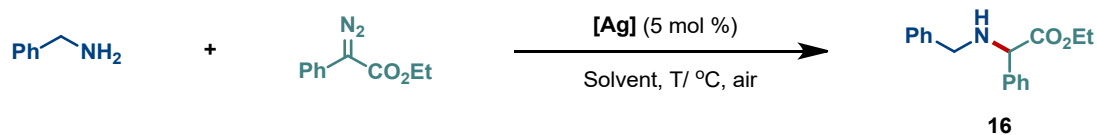

| Entry | [Ag]                                                       | Solvent           | T (°C) | Yield of 16 (%)      |
|-------|------------------------------------------------------------|-------------------|--------|----------------------|
| 1     | —                                                          | DCE               | 60     | 0                    |
| 2     | AgOTf (5 mol %)                                            | DCE               | 60     | 15                   |
| 3     | AgSbF <sub>6</sub> (5 mol %)                               | DCE               | 60     | 29                   |
| 4     | AgBF <sub>4</sub> (5 mol %)                                | DCE               | 60     | 32                   |
| 5     | Tp <sup>(CF<sub>3</sub>)<sub>2</sub></sup> Ag (5 mol %)    | DCE               | 60     | 76                   |
| 6     | [Tp <sup>Br<sub>3</sub></sup> Ag] <sub>2</sub> (2.5 mol %) | DCE               | 60     | 92 (91) <sup>b</sup> |
| 7     | [Tp <sup>Br<sub>3</sub></sup> Ag] <sub>2</sub> (2.5 mol %) | DCE               | 40     | 52                   |
| 8     | [Tp <sup>Br<sub>3</sub></sup> Ag] <sub>2</sub> (2.5 mol %) | DCE               | 80     | 71                   |
| 9     | [Tp <sup>Br<sub>3</sub></sup> Ag] <sub>2</sub> (2.5 mol %) | CHCl <sub>3</sub> | 60     | 88                   |
| 10    | [Tp <sup>Br<sub>3</sub></sup> Ag] <sub>2</sub> (2.5 mol %) | 1,4-dioxane       | 60     | 47                   |
| 11    | [Tp <sup>Br<sub>3</sub></sup> Ag] <sub>2</sub> (2.5 mol %) | PhCF <sub>3</sub> | 60     | 85                   |
| 12    | [Tp <sup>Br<sub>3</sub></sup> Ag] <sub>2</sub> (2.5 mol %) | PhMe              | 60     | 75                   |

<sup>a</sup> Conditions: Benzylamine (0.3 mmol), [Tp<sup>Br<sub>3</sub></sup>Ag]<sub>2</sub> (2.5 mol %), **1a** (0.36 mmol) in DCE (3 mL) at 60 °C for 6 h.

<sup>b</sup> Isolated yields are given.

**Table S2.** Optimization of the reaction conditions with sulfonyl hydrazones and aliphatic amines<sup>a</sup>

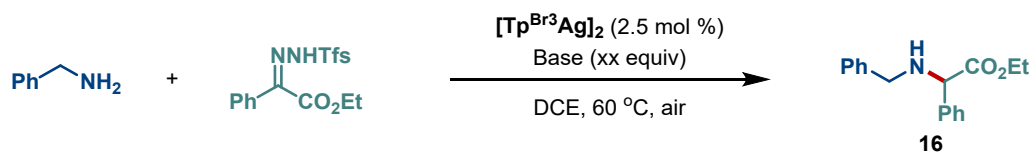

| Entry                 | <b>1b</b> (mmol) | <b>Benzylamine</b><br>(mmol) | <b>Base</b> (mmol)                    | <b>Yield of 16</b> (%)     |
|-----------------------|------------------|------------------------------|---------------------------------------|----------------------------|
| <b>1</b>              | 0.2              | 0.24                         | NaH (0.24)                            | 21                         |
| <b>2</b>              | 0.2              | 0.24                         | K <sub>2</sub> CO <sub>3</sub> (0.24) | 23                         |
| <b>3</b>              | 0.2              | 0.24                         | KO <sup>t</sup> Bu (0.24)             | 20                         |
| <b>4</b>              | 0.2              | 0.24                         | LiO <sup>t</sup> Bu (0.24)            | 45                         |
| <b>5</b>              | 0.2              | 0.24                         | DIPEA (0.24)                          | trace                      |
| <b>6</b>              | 0.2              | 0.24                         | DBU (0.24)                            | 12                         |
| <b>7</b>              | 0.2              | 0.24                         | Pydine (0.24)                         | 10                         |
| <b>8</b>              | 0.2              | 0.2                          | LiO <sup>t</sup> Bu (0.2)             | 55                         |
| <b>9</b>              | 0.3              | 0.2                          | LiO <sup>t</sup> Bu (0.2)             | 67                         |
| <b>10</b>             | 0.4              | 0.2                          | LiO <sup>t</sup> Bu (0.2)             | 77                         |
| <b>11</b>             | 0.4              | 0.2                          | LiO <sup>t</sup> Bu (0.4)             | 25                         |
| <b>12</b>             | 0.4              | 0.2                          | LiO <sup>t</sup> Bu (0.6)             | 26                         |
| <b>13<sup>b</sup></b> | <b>0.4</b>       | <b>0.2</b>                   | <b>LiO<sup>t</sup>Bu (0.2)</b>        | <b>84 (82)<sup>c</sup></b> |

<sup>a</sup> Conditions: Benzylamine (0.2 mmol), [Tp<sup>Br<sub>3</sub></sup>Ag]<sub>2</sub> (2.5 mol %), **1b** (0.4 mmol), LiO<sup>t</sup>Bu (0.2 mmol) in DCE (5 mL), 60 °C, 6 h; <sup>b</sup> using [Tp<sup>Br<sub>3</sub></sup>Ag]<sub>2</sub> (2.5 mol %). <sup>c</sup> Isolated yields are given.

## 2.2 General procedure for the synthesis of starting materials

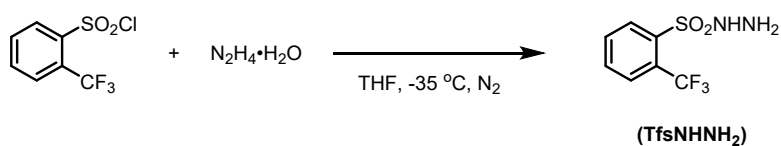

Add *o*-trifluoromethylbenzenesulfonyl chloride (24.4 g, 100 mmol, 1.0 equiv) to 120 mL of tetrahydrofuran (THF) solution to dissolve it. The reaction system was placed at -35 °C and hydrazine hydrate (24 mL, 250 mmol, 2.5 equiv) was added dropwise under argon atmosphere. After 4 hours of reaction, the reaction system was monitored by TLC until the raw materials disappeared. After the reaction, extract with ethyl acetate (about 60mL×3), wash with saturated sodium chloride solution, combine the organic phases, dry with anhydrous Na<sub>2</sub>SO<sub>4</sub>, and concentrate in vacuo; slowly drop the remaining solution into 500mL cold petroleum ether placed in a round bottom flask to precipitate the product; then the solid was filtered off with suction and dried in vacuum to obtain a white powdery solid with a yield of 85%.

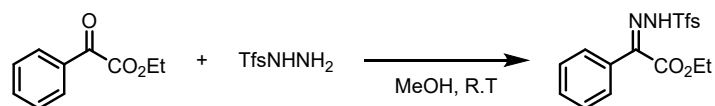

Add ethyl benzoylformate (1.81 g, 11 mmol, 1.1 equiv) to a 50 mL round bottom flask, add 15 mL of methanol, and then add TfsNHNH<sub>2</sub> (2.4 g, 10 mmol, 1.0 equiv), and stir at room temperature for approx. After 1 hour, the reaction system was monitored by TLC until TfsNHNH<sub>2</sub> disappeared. The suspension was filtered with suction and washed with ether: petroleum ether = 10:1 to obtain a white powdery solid with a yield of 80%. Use the same method for other *N*-triflylhydrazones.

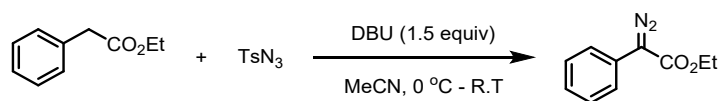

At 0 °C, *p*-toluenesulfonyl azide (2.17 g, 11 mmol, 1.1 eq) was added to ethyl phenylacetate (1.64 g, 10 mmol, 1 eq) dissolved in 30 mL of acetonitrile. Under argon atmosphere, DBU (2.28 g, 15 mmol, 1.5 eq) was slowly added dropwise to the system, and stirring was continued for about 6 hours at room temperature. The reaction system was monitored by TLC, and the reaction was stopped when the raw materials disappeared. It was quenched with saturated NH<sub>4</sub>Cl (20 mL), extracted with DCE (30 mL × 3), and the organic phases were combined, dried over anhydrous Na<sub>2</sub>SO<sub>4</sub>, and then concentrated in vacuo. The product was purified by flash column chromatography (PE : EA = 100 : 1) to obtain a red oily liquid with a yield of 90%. Use the same method for other diazonium compounds.

## 2.3 Synthesis of silver catalyst

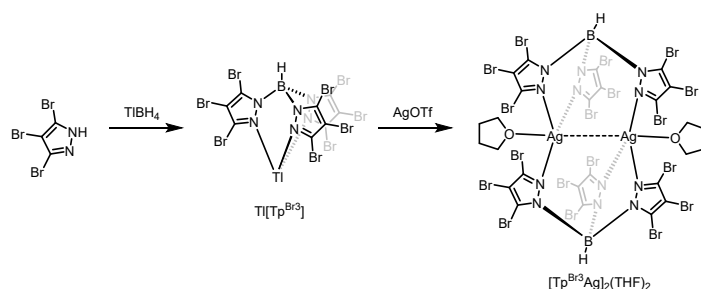

**[Tp<sup>Br3</sup>Ag]<sub>2</sub>(THF)<sub>2</sub> Synthesize according to the previously reported literature<sup>1</sup>** Previously sublimed 1H-3,4,5-tribromopyrazole (12.19 g, 40.0 mmol) and TIBH<sub>4</sub> (2.19 g, 10.0 mmol) were added to a 500 mL Schlenk tube. The tube was closed with a rubber septum and three vacuum/nitrogen cycles were made. The septum was replaced with a reflux condenser fitted with a bubbler on top. The nitrogen flow was stopped and the stirred solid mixture was warmed to 180-185 °C for 2 h before the temperature was increased to 200 °C and the reaction mixture stirred for an additional 2 h. After cooling to room temperature, the obtained white solid was directly purified by sublimation to remove the unreacted pyrazole (150 °C, 2 mbar) to give TlTp<sup>Br3</sup> as a white solid (13.4 g, 89% yield). Silver triflate (1.29 g, 5.0 mmol) was added to a solution of TlTp<sup>Br3</sup> (5.64 g, 5.0 mmol) in acetone. After 20 h of stirring in the dark, a white solid precipitated from the initially colorless solution. The solid was filtered off and dried under vacuum to give complex [Tp<sup>Br3</sup>Ag]<sub>2</sub>.CH<sub>3</sub>COCH<sub>3</sub>. [Tp<sup>Br3</sup>Ag]<sub>2</sub>.CH<sub>3</sub>COCH<sub>3</sub> (5.0 mmol) was stirred in fresh distilled THF (100 mL) for 30 min in the dark. After the removal of the volatiles under reduced pressure, a white solid was obtained in quantitative yield.

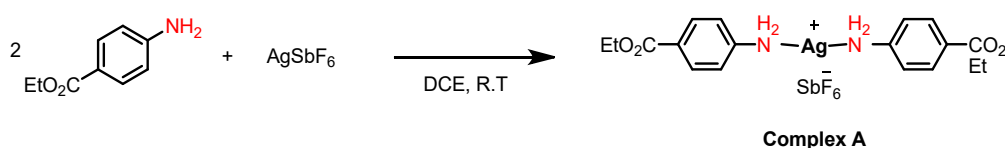

**Amine/silver complex A:** To a round bottom sealed tube, AgSbF<sub>6</sub> (171.8 mg, 0.5 mmol) were added under air atmosphere. DCM (2 mL) was added to dissolve AgSbF<sub>6</sub>. Ethyl 4-aminobenzoate (173 mg, 1.05 mmol) dissolved in DCM (2 mL) were added to the tube. After stirring for 5 min after the addition at room temperature, a large amount of white solid precipitated out, and the suspension was centrifuged. Wash with DCM (5 mL × 3), and then dry the solid to obtain the white solid amine/silver complex A (329 mg, 98% yield).

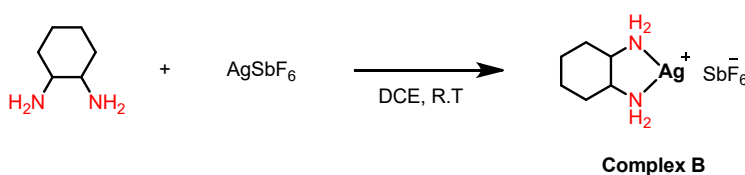

**Amine/silver complex B:** To a round bottom sealed tube,  $\text{AgSbF}_6$  (171.8 mg, 0.5 mmol) were added under air atmosphere. DCE (2 mL) was added to dissolve  $\text{AgSbF}_6$ . 1,2-Diaminocyclohexane (60 mg, 0.52 mmol) dissolved in DCE (2 mL) were added to the tube. The resulting mixture was stirred at room temperature for 10 minutes, and a large amount of white solid precipitated. Then the solvent was evaporated in vacuo and washed with DCM (5 mL $\times$ 3) to obtain white solid amine/silver complex **B** (211.6 mg, 95% yield).

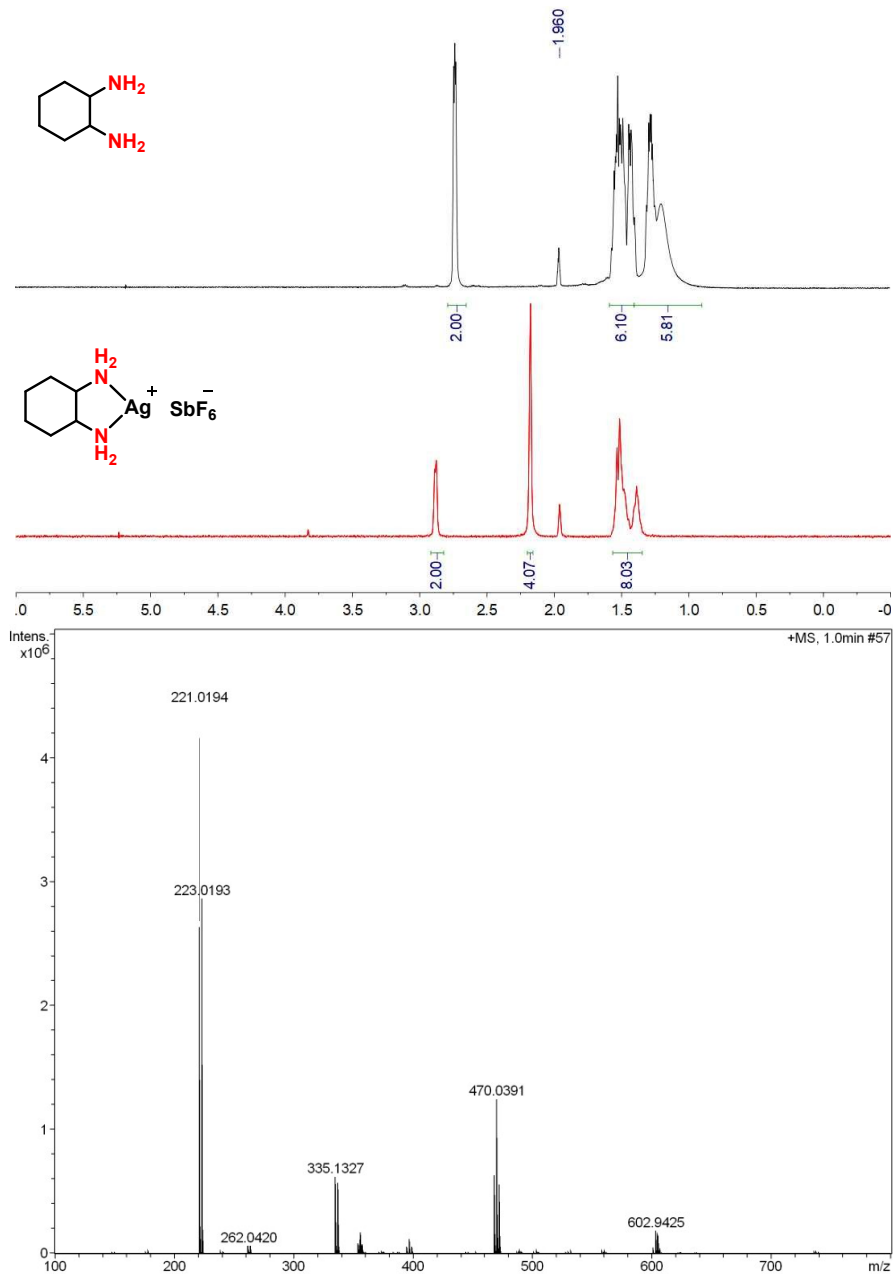

**HRMS (ESI $^+$ )**  $m/z$  calcd for  $\text{C}_6\text{H}_{14}\text{AgN}_2$   $[\text{M}+\text{H}]^+$  221.0202, found 221.0194.

**Table S3.** Screening of amine ligands<sup>a</sup>

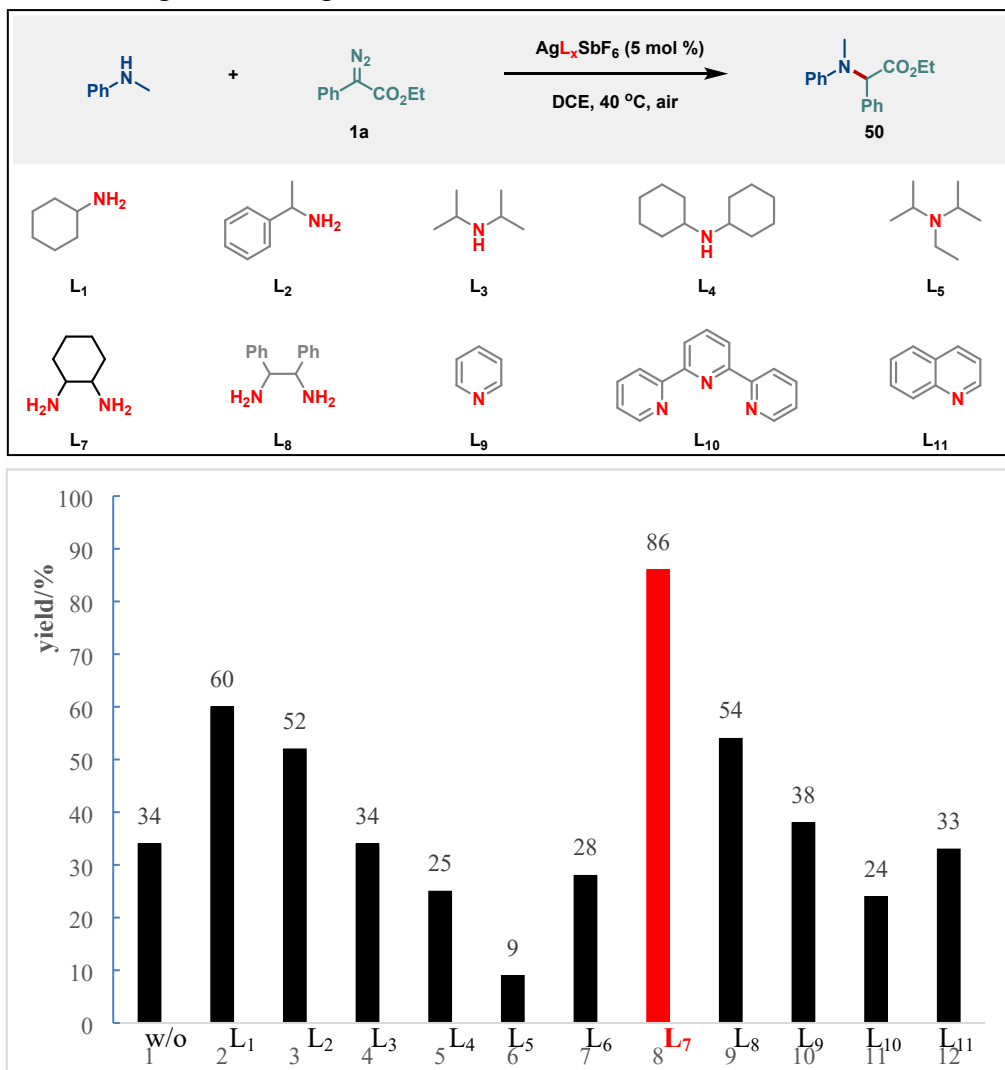

<sup>a</sup> Conditions: *N*-Methylaniline (0.3 mmol), amine/silver complex (5 mol %), **1a** (0.36 mmol) in DCE (3 mL), 40 °C, 1 h. Isolated yields are given.



## 2.4 General procedure for the synthesis of products

### i. N-H bond insertion reaction of aliphatic amines

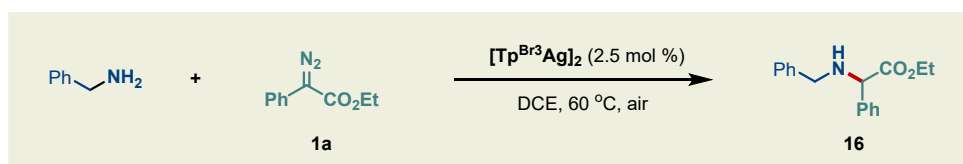

**Typical synthetic procedure (with 16 as an example): Method A:** To a dried Schlenk flask, [Tp<sup>Br3</sup>Ag]<sub>2</sub> (16.5 mg, 0.015 mmol) were added under air atmosphere. Benzylamine (0.3 mmol) and ethyl 2-diazo-2-phenylacetate **1a** (0.36 mmol) dissolved in DCE (3 mL) were added to the Schlenk flask via a syringe. The resulting mixture was stirred at 60 °C under sealed conditions for 6 h. After cooling to room temperature, the reaction mixture was diluted with DCM (5 mL) and filtered through a plug of celite, followed by washing with DCM (5 mL × 3). The combined residue was concentrated under reduced pressure, and then the resulting crude product was purified by column chromatography with ethyl acetate/petroleum ether (1:25 v:v) as an eluent to provide the product **16**.

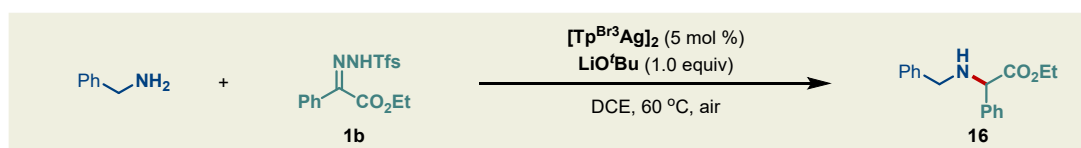

**Method B:** To a dried Schlenk flask, [Tp<sup>Br3</sup>Ag]<sub>2</sub> (16.5 mg, 0.015 mmol), ethyl 2-phenyl-2-((2-(trifluoromethyl)phenyl)sulfonylhydrazono)acetate **1b** (0.6 mmol) and LiO<sup>t</sup>Bu (1.0 equiv) were added under air atmosphere. Benzylamine (0.3 mmol) dissolved in DCE (3 mL) were added to the Schlenk flask via a syringe. The resulting mixture was stirred at 60 °C under sealed conditions for 10 h. After cooling to room temperature, the reaction mixture was diluted with DCM (5 mL) and filtered through a plug of celite, followed by washing with DCM (5 mL × 3). The combined residue was concentrated under reduced pressure, and then the resulting crude product was purified by column chromatography with ethyl acetate/petroleum ether (1:25 v:v) as an eluent to provide the product **16**.

### ii. N-H bond insertion reaction of aromatic amines

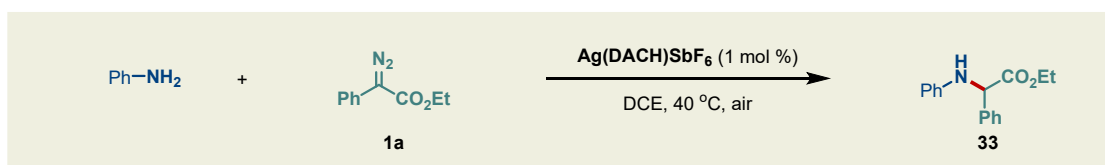

**Typical synthetic procedure (with 33 as an example): Method C:** To a dried sealed tube,

Ag(DACH)SbF<sub>6</sub> (1.4 mg, 0.003 mmol) were added under air atmosphere. Aniline (0.3 mmol) and ethyl 2-diazo-2-phenylacetate **1a** (0.36 mmol) dissolved in DCE (3 mL) were added to the sealed tube via a syringe. The resulting mixture was stirred at 40 °C under sealed conditions for 2 h. After cooling to room temperature, the reaction mixture was diluted with DCM (5 mL) and filtered through a plug of celite, then washed with DCM (5 mL × 3). The combined residues were concentrated under reduced pressure, and then the resulting crude product was purified by column chromatography using ethyl acetate/petroleum ether (1:25 v:v) as eluent to provide product **33**.

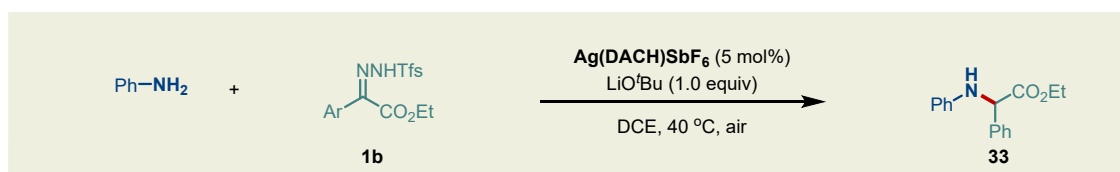

**Method D:** To a dried sealed tube, Ag(DACH)SbF<sub>6</sub> (1.4 mg, 0.015 mmol), ethyl 2-phenyl-2-((2-(trifluoromethyl)phenyl)sulfonyl)hydrazono)acetate **1b** (0.36 mmol) and LiO<sup>t</sup>Bu (1.0 equiv) were added under air atmosphere. Aniline (0.3 mmol) and dissolved in DCE (3 mL) were added to the sealed tube via a syringe. The resulting mixture was stirred at 40 °C under sealed conditions for 2 h. After cooling to room temperature, the reaction mixture was diluted with DCM (5 mL) and filtered through a plug of celite, then washed with DCM (5 mL × 3). The combined residues were concentrated under reduced pressure, and then the resulting crude product was purified by column chromatography using ethyl acetate/petroleum ether (1:25 v:v) as eluent to provide product **33**.

## 2.5 Mechanistic investigations

i. Equivalent complex A replacement catalyst and aromatic amine

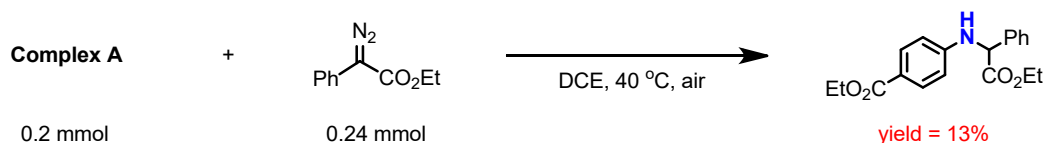

To a dried sealed tube, complex A (1.4 mg, 0.015 mmol) were added under air atmosphere. ethyl 2-diazo-2-phenylacetate **1a** (0.36 mmol) dissolved in DCE (3 mL) were added to the sealed tube via a syringe. The resulting mixture was stirred at 40 °C under sealed conditions for 1 h. After cooling to room temperature, the reaction mixture was diluted with DCM (5 mL) and filtered through a plug of celite, then washed with DCM (5 mL × 3). The combined residues were concentrated under reduced pressure, and then the resulting crude product was purified by column chromatography using ethyl acetate/petroleum ether (1:25 v:v) as eluent

to provide product **33** of 13% yield.

ii. KIE determined from an intermolecular competition

To a dried sealed tube, Ag(DACH)SbF<sub>6</sub> (7 mg, 0.01 mmol) were added under air atmosphere. *N*-Methylaniline (0.2 mmol, H/D = 1:1) and ethyl 2-diazo-2-phenylacetate **1a** (0.36 mmol) dissolved in DCE (3 mL) were added to the sealed tube via a syringe. The resulting mixture was stirred at 40 °C under sealed conditions for 1 h. After cooling to room temperature, the deuterium content of product **33** is 15% by nuclear magnetic monitoring.

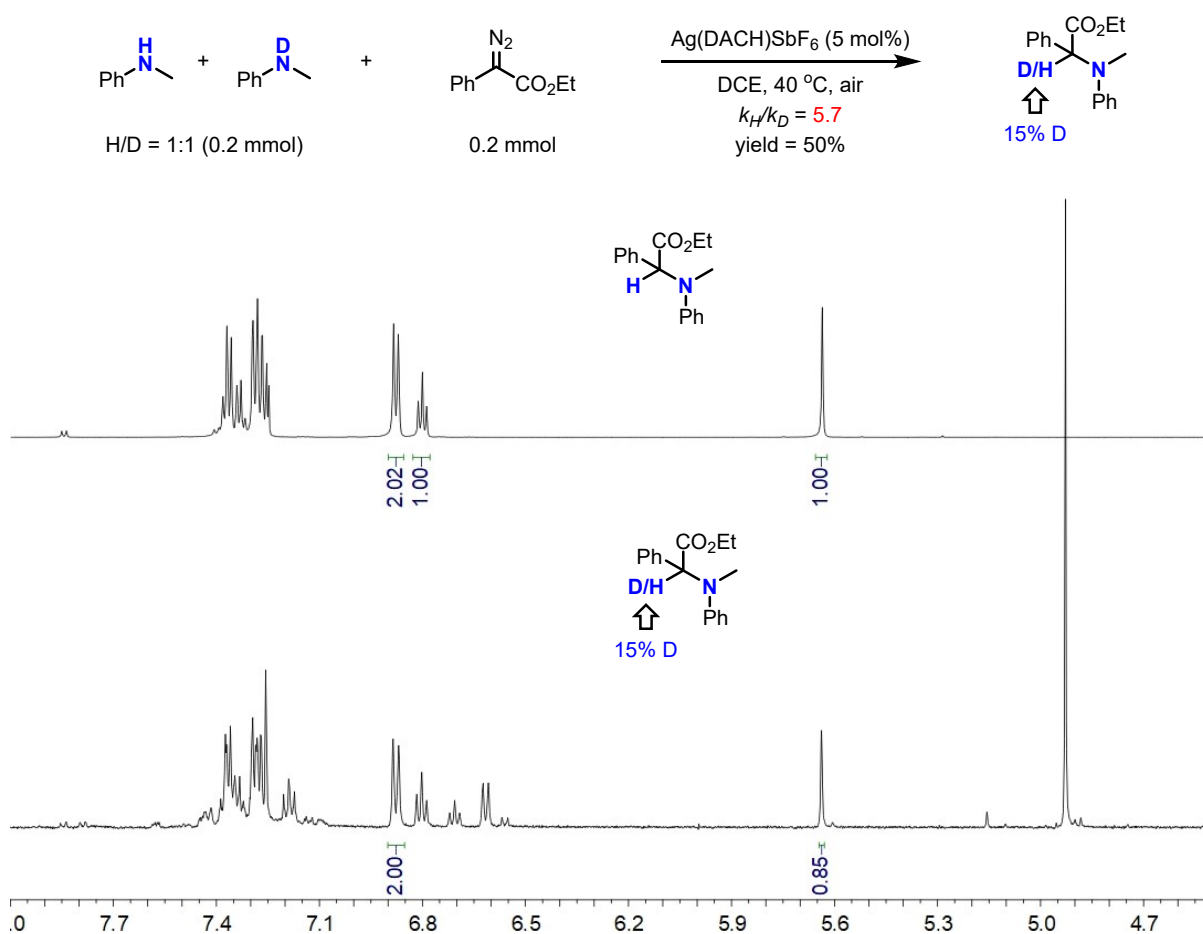

## 2.6 Reaction supplement of other substrates

### i. Amide as substrate

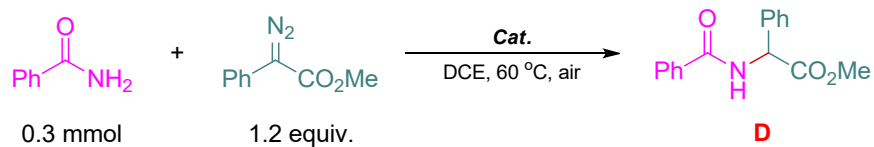

| Entry | Cat.                                           | Yield of C |
|-------|------------------------------------------------|------------|
| 1     | [Tp <sup>Br3</sup> Ag] <sub>2</sub> (2.5 mol%) | 22%        |
| 2     | Ag(DACH)SbF <sub>6</sub> (5 mol%)              | 10%        |
| 3     | AgSbF <sub>6</sub> (5 mol%)                    | trace      |

### ii. Reaction of other diazo compounds with benzylamine

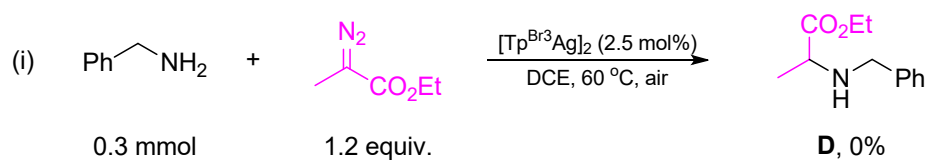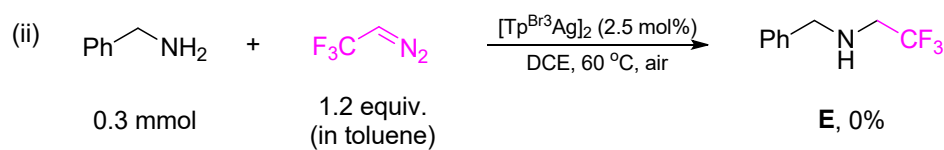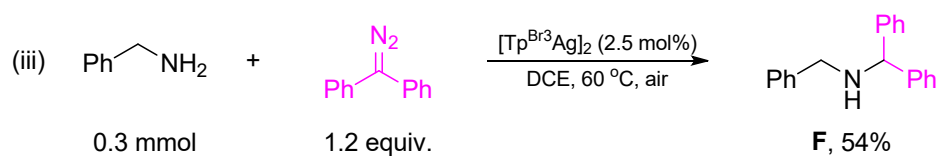

### 3 Computational details

In Figure 3a, all of the density functional theory (DFT) calculations were performed with the Gaussian 16 package.<sup>2</sup> The B97D<sup>3</sup> method with DEF2SVP<sup>4</sup> basis set has been selected for geometry optimizations under gas phase condition. The nature of the extrema (minimum) was established with analytical frequencies calculations and geometry optimizations were computed without any symmetry constraints. Intrinsic Reaction Paths (IRPs)<sup>5,6</sup> were traced from the various transition structures to obtain the connected intermediates.

In Figure 4, all of the density functional theory (DFT) calculations were performed with the Gaussian 16 package.<sup>2</sup> The B3LYP-D3<sup>7,8</sup> method with DEF2SVP<sup>4</sup> basis set has been selected for geometry optimizations. The nature of the extrema (minimum) was established with analytical frequencies calculations and geometry optimizations were computed without any symmetry constraints. Intrinsic Reaction Paths (IRPs)<sup>5,6</sup> were traced from the various transition structures to obtain the connected intermediates. The SMD solvation model was used to evaluate solvation energies by a self-consistent reaction field (SCRF) approach based on accurate numerical solutions of the Poisson–Boltzmann equation.<sup>9</sup> 1,2-dichloroethane was chosen as solvent. 3D diagrams of the computed species were generated using CYLview visualization software.<sup>10</sup>

#### Cartesian coordinates of all optimized structures

TS-int

|                                              |            |             |                             |
|----------------------------------------------|------------|-------------|-----------------------------|
| Zero-point correction=                       |            |             | 0.194167 (Hartree/Particle) |
| Thermal correction to Energy=                |            |             | 0.219260                    |
| Thermal correction to Enthalpy=              |            |             | 0.220204                    |
| Thermal correction to Gibbs Free Energy=     |            |             | 0.134333                    |
| Sum of electronic and zero-point Energies=   |            |             | -1540.179481                |
| Sum of electronic and thermal Energies=      |            |             | -1540.154388                |
| Sum of electronic and thermal Enthalpies=    |            |             | -1540.153444                |
| Sum of electronic and thermal Free Energies= |            |             | -1540.239315                |
| Sb                                           | 3.37083600 | -0.65230100 | 0.07083000                  |
| F                                            | 2.94286200 | 0.89718000  | -1.17787400                 |
| F                                            | 3.89312100 | -1.68740200 | -1.46231500                 |
| F                                            | 5.12831100 | 0.08628700  | 0.31826300                  |

|    |             |             |             |
|----|-------------|-------------|-------------|
| F  | 3.63376200  | -2.09112300 | 1.31835900  |
| F  | 2.65088000  | 0.51544700  | 1.49122900  |
| F  | 1.48081200  | -1.16515500 | -0.20168600 |
| Ag | 0.92457900  | 1.75982000  | -0.55337000 |
| C  | -4.03374200 | 0.75332700  | 0.77119800  |
| C  | -2.75919000 | 1.20666900  | 1.13347300  |
| C  | -1.62601000 | 0.42736800  | 0.83182400  |
| C  | -1.76529300 | -0.80474000 | 0.16117900  |
| C  | -3.04192000 | -1.24995000 | -0.19618900 |
| C  | -4.18854500 | -0.47967300 | 0.10054900  |
| H  | -4.91803800 | 1.35352000  | 1.00851600  |
| H  | -2.64065800 | 2.16641200  | 1.65416000  |
| H  | -0.87211900 | -1.39553700 | -0.07177700 |
| H  | -3.17512900 | -2.20667800 | -0.71402100 |
| N  | -0.31481600 | 0.90757100  | 1.15692200  |
| H  | -0.32034100 | 1.55267400  | 1.95054900  |
| H  | 0.34585100  | 0.14623400  | 1.36331800  |
| C  | -5.52545300 | -1.01796600 | -0.31605600 |
| O  | -5.68709400 | -2.07362600 | -0.89889400 |
| O  | -6.54130600 | -0.18966300 | 0.03173800  |
| C  | -7.87704900 | -0.61967300 | -0.32538700 |
| H  | -7.92272900 | -0.76145600 | -1.42291000 |
| H  | -8.06797400 | -1.60719000 | 0.13823600  |
| C  | -8.85252500 | 0.44138600  | 0.15874500  |
| H  | -9.88562300 | 0.14189400  | -0.09982100 |
| H  | -8.78803000 | 0.56424200  | 1.25628400  |
| H  | -8.64151000 | 1.41739300  | -0.31748400 |

TS

|                                              |                             |
|----------------------------------------------|-----------------------------|
| Zero-point correction=                       | 0.200212 (Hartree/Particle) |
| Thermal correction to Energy=                | 0.223956                    |
| Thermal correction to Enthalpy=              | 0.224900                    |
| Thermal correction to Gibbs Free Energy=     | 0.141994                    |
| Sum of electronic and zero-point Energies=   | -1540.246047                |
| Sum of electronic and thermal Energies=      | -1540.222303                |
| Sum of electronic and thermal Enthalpies=    | -1540.221359                |
| Sum of electronic and thermal Free Energies= | -1540.304265                |

|    |            |             |             |
|----|------------|-------------|-------------|
| Sb | 3.04982200 | -1.06519600 | 0.06592100  |
| F  | 3.32761000 | 0.95431000  | -0.31478400 |
| F  | 4.42064000 | -1.61378100 | -1.17026600 |
| F  | 4.09779200 | -0.81298200 | 1.69246800  |

|    |             |             |             |
|----|-------------|-------------|-------------|
| F  | 2.42210900  | -2.82680700 | 0.60499100  |
| F  | 1.16000400  | -0.18156400 | 1.69462500  |
| F  | 1.53571700  | -0.86377100 | -1.21141600 |
| Ag | 1.39035200  | 2.06523900  | -0.37752200 |
| C  | -4.04961000 | 1.16629600  | 0.47366300  |
| C  | -2.93758100 | 1.97773000  | 0.66756700  |
| C  | -1.63017700 | 1.55172500  | 0.24819500  |
| C  | -1.51322600 | 0.25050800  | -0.34994300 |
| C  | -2.63150000 | -0.55166400 | -0.53229600 |
| C  | -3.92059500 | -0.11226900 | -0.13031300 |
| H  | -5.04055900 | 1.51040400  | 0.78817400  |
| H  | -3.04666200 | 2.96839200  | 1.12865200  |
| H  | -0.51724200 | -0.11320500 | -0.63124800 |
| H  | -2.53807500 | -1.54696100 | -0.98181300 |
| N  | -0.53324000 | 2.33407000  | 0.41912600  |
| H  | -0.74538900 | 3.20045800  | 0.91786900  |
| H  | 0.42537400  | 0.32076700  | 1.38260100  |
| C  | -5.07767600 | -1.02796400 | -0.35451000 |
| O  | -4.99434400 | -2.12739800 | -0.87346000 |
| O  | -6.24762600 | -0.49549000 | 0.08622000  |
| C  | -7.43145200 | -1.30737600 | -0.08989500 |
| H  | -7.55016300 | -1.53546700 | -1.16743200 |
| H  | -7.28173800 | -2.27355300 | 0.43091300  |
| C  | -8.61509500 | -0.53185000 | 0.46689300  |
| H  | -9.53974300 | -1.12736400 | 0.34705600  |
| H  | -8.47386800 | -0.31698800 | 1.54292100  |
| H  | -8.74438500 | 0.42744000  | -0.06885100 |

1a

|                                              |                             |
|----------------------------------------------|-----------------------------|
| Zero-point correction=                       | 0.408414 (Hartree/Particle) |
| Thermal correction to Energy=                | 0.443414                    |
| Thermal correction to Enthalpy=              | 0.444359                    |
| Thermal correction to Gibbs Free Energy=     | 0.336009                    |
| Sum of electronic and zero-point Energies=   | -1978.668855                |
| Sum of electronic and thermal Energies=      | -1978.633854                |
| Sum of electronic and thermal Enthalpies=    | -1978.632910                |
| Sum of electronic and thermal Free Energies= | -1978.741260                |

|    |            |             |             |
|----|------------|-------------|-------------|
| Sb | 2.29662700 | -1.62724100 | -0.31513700 |
| F  | 2.91310300 | 0.08209300  | -1.00265700 |
| F  | 3.11228400 | -2.52332000 | -1.80749500 |
| F  | 3.91039200 | -1.80503000 | 0.71372100  |

|    |             |             |             |
|----|-------------|-------------|-------------|
| F  | 1.63286700  | -3.30775500 | 0.36403800  |
| F  | 1.45476200  | -0.70012800 | 1.16071300  |
| F  | 0.66170300  | -1.42111700 | -1.35295000 |
| Ag | -0.86870800 | 0.79971500  | -0.56498900 |
| N  | -2.32693300 | -1.71968000 | -1.46604500 |
| C  | -2.67530300 | -0.89168500 | -0.47271800 |
| N  | -2.01870900 | -2.40796000 | -2.29989100 |
| C  | -3.72237900 | 0.06165600  | -0.94984800 |
| O  | -4.13472200 | 0.07015000  | -2.09120500 |
| O  | -4.10622500 | 0.91634200  | 0.00315900  |
| C  | -5.12969000 | 1.88747900  | -0.33480800 |
| H  | -4.92061700 | 2.28672200  | -1.33812200 |
| H  | -4.99281300 | 2.68820300  | 0.40482300  |
| C  | -6.51561900 | 1.28001300  | -0.25309900 |
| H  | -7.26955700 | 2.05890300  | -0.45052300 |
| H  | -6.63972400 | 0.48212800  | -1.00052300 |
| H  | -6.70325100 | 0.86267700  | 0.74886900  |
| C  | -2.31431900 | -1.34091000 | 0.91075100  |
| C  | -1.30488600 | -2.30948800 | 1.08225200  |
| C  | -2.93341700 | -0.80554800 | 2.05721700  |
| C  | -0.91347500 | -2.71629200 | 2.35663900  |
| H  | -0.78168100 | -2.72563900 | 0.22206700  |
| C  | -2.53783200 | -1.22477200 | 3.33048400  |
| H  | -3.71556700 | -0.05738300 | 1.95489100  |
| C  | -1.52650300 | -2.17683100 | 3.49160600  |
| H  | -0.10510400 | -3.44476900 | 2.44952500  |
| H  | -3.03077300 | -0.79488100 | 4.20660200  |
| H  | -1.21626200 | -2.49138200 | 4.49117800  |
| C  | 3.24258800  | 4.04642900  | 1.52736300  |
| C  | 3.13050900  | 4.71887900  | 0.15618300  |
| C  | 2.59299500  | 3.73455500  | -0.88565800 |
| C  | 1.24349700  | 3.11844200  | -0.48356400 |
| C  | 1.33658800  | 2.46543300  | 0.91352800  |
| C  | 1.89660300  | 3.45142600  | 1.94863700  |
| H  | 2.48516000  | 4.22239400  | -1.86914100 |
| H  | 2.44858300  | 5.58601700  | 0.22834900  |
| H  | 4.10889800  | 5.11191100  | -0.16638000 |
| H  | 3.99650200  | 3.24014600  | 1.47728200  |
| H  | 3.59480500  | 4.76437800  | 2.28657000  |
| H  | 0.47996700  | 3.91577300  | -0.43042200 |
| H  | 2.02581800  | 1.61290700  | 0.81850200  |
| H  | 1.16072600  | 4.26649300  | 2.08611300  |
| H  | 1.98268800  | 2.93372600  | 2.91867300  |
| H  | 3.31406100  | 2.90689700  | -1.01576100 |



|   |             |            |             |
|---|-------------|------------|-------------|
| N | 0.03673400  | 1.90628200 | 1.32900600  |
| H | 0.17559400  | 1.21982600 | 2.07185600  |
| H | -0.55924900 | 2.64101700 | 1.71779000  |
| N | 0.78083900  | 2.13737700 | -1.48739000 |
| H | 0.55972800  | 2.60952900 | -2.36534800 |
| H | 1.54526900  | 1.48761500 | -1.69390300 |

TS1

|                                              |                             |
|----------------------------------------------|-----------------------------|
| Zero-point correction=                       | 0.406009 (Hartree/Particle) |
| Thermal correction to Energy=                | 0.441068                    |
| Thermal correction to Enthalpy=              | 0.442012                    |
| Thermal correction to Gibbs Free Energy=     | 0.334063                    |
| Sum of electronic and zero-point Energies=   | -1978.644761                |
| Sum of electronic and thermal Energies=      | -1978.609703                |
| Sum of electronic and thermal Enthalpies=    | -1978.608759                |
| Sum of electronic and thermal Free Energies= | -1978.716708                |

|    |             |             |             |
|----|-------------|-------------|-------------|
| Sb | -2.30031700 | -1.84238200 | -0.04420500 |
| F  | -3.35521500 | -0.25899000 | 0.34035400  |
| F  | -3.38226900 | -2.86469200 | 1.17370300  |
| F  | -3.46350100 | -2.28915000 | -1.50760700 |
| F  | -1.19971500 | -3.38939900 | -0.39128200 |
| F  | -1.19246100 | -0.79982300 | -1.24288800 |
| F  | -1.12421600 | -1.34617600 | 1.42285200  |
| Ag | 0.71793300  | 0.97210300  | 0.54198200  |
| N  | 2.89093800  | -0.38860300 | 2.35212600  |
| C  | 2.63920800  | 0.02493400  | 0.59202700  |
| N  | 2.63262800  | -0.75728500 | 3.36122000  |
| C  | 3.65984000  | 1.11518100  | 0.48617800  |
| O  | 4.23251700  | 1.66214500  | 1.40371000  |
| O  | 3.76795200  | 1.46958500  | -0.80202000 |
| C  | 4.62625600  | 2.59190600  | -1.12498300 |
| H  | 4.50014300  | 3.36921800  | -0.35654400 |
| H  | 4.23618000  | 2.96783300  | -2.08101200 |
| C  | 6.07398900  | 2.15831400  | -1.24376300 |
| H  | 6.69342400  | 3.01876400  | -1.54420800 |
| H  | 6.45020300  | 1.78241100  | -0.28037400 |
| H  | 6.18637000  | 1.36943300  | -2.00414500 |
| C  | 2.85578200  | -1.26131500 | -0.09385200 |
| C  | 1.79455600  | -2.18721700 | -0.18064400 |
| C  | 4.09731800  | -1.59010300 | -0.68409400 |
| C  | 1.95693200  | -3.39498500 | -0.85560900 |

|   |             |             |             |
|---|-------------|-------------|-------------|
| H | 0.84537700  | -1.95458000 | 0.29952200  |
| C | 4.25359500  | -2.79315900 | -1.36980600 |
| H | 4.93587900  | -0.89431500 | -0.61855000 |
| C | 3.18490700  | -3.69598000 | -1.45706100 |
| H | 1.11570000  | -4.08764900 | -0.91777600 |
| H | 5.21255800  | -3.03284200 | -1.83570200 |
| H | 3.31242900  | -4.63893200 | -1.99536400 |
| C | -3.89037100 | 3.63975100  | -1.43518600 |
| C | -3.98406700 | 4.10416700  | 0.02163500  |
| C | -3.31759400 | 3.09218700  | 0.95804800  |
| C | -1.85704300 | 2.80991800  | 0.57509500  |
| C | -1.74828900 | 2.37224400  | -0.89919700 |
| C | -2.43323300 | 3.38216000  | -1.82990400 |
| H | -3.35445900 | 3.44113800  | 2.00398300  |
| H | -3.48505200 | 5.08528200  | 0.12507500  |
| H | -5.03658500 | 4.25253400  | 0.31498100  |
| H | -4.46926200 | 2.70649700  | -1.55736300 |
| H | -4.34118900 | 4.38503300  | -2.11143100 |
| H | -1.26559200 | 3.73642600  | 0.69292300  |
| H | -2.26148400 | 1.40330400  | -0.98106900 |
| H | -1.86748600 | 4.33251700  | -1.79268700 |
| H | -2.36681600 | 3.01230000  | -2.86696300 |
| H | -3.86644800 | 2.13471300  | 0.91732100  |
| N | -0.34065700 | 2.13270000  | -1.26004600 |
| H | -0.28910500 | 1.57822800  | -2.11575500 |
| H | 0.12794500  | 3.01915000  | -1.46377200 |
| N | -1.24388600 | 1.78939100  | 1.44934400  |
| H | -1.16480400 | 2.14642700  | 2.40303800  |
| H | -1.86586400 | 0.97860100  | 1.50563700  |

int1

|                                              |                             |
|----------------------------------------------|-----------------------------|
| Zero-point correction=                       | 0.517841 (Hartree/Particle) |
| Thermal correction to Energy=                | 0.557841                    |
| Thermal correction to Enthalpy=              | 0.558785                    |
| Thermal correction to Gibbs Free Energy=     | 0.439561                    |
| Sum of electronic and zero-point Energies=   | -2156.571263                |
| Sum of electronic and thermal Energies=      | -2156.531263                |
| Sum of electronic and thermal Enthalpies=    | -2156.530318                |
| Sum of electronic and thermal Free Energies= | -2156.649542                |

|    |             |            |             |
|----|-------------|------------|-------------|
| Ag | 0.52546900  | 0.43722100 | -0.69670600 |
| C  | -1.36708600 | 0.34407000 | -1.46796000 |

|   |             |             |             |
|---|-------------|-------------|-------------|
| C | -2.34822900 | 1.09036400  | -0.65913900 |
| O | -3.00866500 | 0.55157200  | 0.21675500  |
| O | -2.36877400 | 2.39133600  | -0.93485700 |
| C | -3.15523500 | 3.26001400  | -0.07557000 |
| H | -4.09751300 | 2.75404300  | 0.18052100  |
| H | -3.37862700 | 4.13458300  | -0.70177400 |
| C | -2.36973000 | 3.64076700  | 1.16342500  |
| H | -2.96459200 | 4.33348200  | 1.78007700  |
| H | -2.13843700 | 2.75205600  | 1.77055500  |
| H | -1.42641900 | 4.14083600  | 0.89219300  |
| C | -1.83097300 | -0.42026900 | -2.57772400 |
| C | -0.88947600 | -1.12453900 | -3.38402400 |
| C | -3.21694900 | -0.52858700 | -2.90598500 |
| C | -1.30806900 | -1.90458900 | -4.45209400 |
| H | 0.16992400  | -1.04081800 | -3.14513200 |
| C | -3.62858300 | -1.31121300 | -3.97464200 |
| H | -3.96069800 | -0.00935700 | -2.29726800 |
| C | -2.67626800 | -1.99980800 | -4.74572700 |
| H | -0.57238900 | -2.45232300 | -5.04338900 |
| H | -4.69057400 | -1.39714900 | -4.21527800 |
| H | -3.00781900 | -2.61936500 | -5.58332600 |
| C | 5.72202100  | 1.56020500  | 1.19689000  |
| C | 5.61344800  | 0.12152000  | 1.71390200  |
| C | 4.15242300  | -0.26268700 | 1.96771200  |
| C | 3.28146000  | -0.05513600 | 0.72345500  |
| C | 3.39793400  | 1.37839300  | 0.18186700  |
| C | 4.86508000  | 1.75786100  | -0.05826900 |
| H | 4.07066500  | -1.31532800 | 2.28435800  |
| H | 6.04367100  | -0.56761000 | 0.96486000  |
| H | 6.20388300  | -0.00445200 | 2.63649600  |
| H | 5.38212800  | 2.25790500  | 1.98404400  |
| H | 6.77228200  | 1.81611500  | 0.98002000  |
| H | 3.63256000  | -0.73279900 | -0.06986800 |
| H | 2.96877800  | 2.06148800  | 0.93732300  |
| H | 5.25542500  | 1.12255500  | -0.87489600 |
| H | 4.91829700  | 2.80166200  | -0.41117100 |
| H | 3.74243100  | 0.35296900  | 2.79015100  |
| N | 2.56899400  | 1.50191900  | -1.03216400 |
| H | 2.52862700  | 2.47363000  | -1.34462200 |
| H | 2.99754900  | 0.97078900  | -1.79616600 |
| N | 1.86768300  | -0.39127000 | 0.96048900  |
| H | 1.75874500  | -1.40464000 | 1.02630600  |
| H | 1.55473900  | -0.02027500 | 1.86085700  |
| C | -0.17227000 | -1.06612800 | 3.74714300  |

|    |             |             |             |
|----|-------------|-------------|-------------|
| C  | -1.05368100 | -1.11528600 | 2.66533900  |
| C  | -0.96188700 | -2.15116300 | 1.70605900  |
| C  | 0.05111800  | -3.12508400 | 1.87270900  |
| C  | 0.92928500  | -3.05941200 | 2.95475900  |
| C  | 0.83006700  | -2.03298700 | 3.90424600  |
| H  | -0.26453600 | -0.25241700 | 4.47279800  |
| H  | -1.82089000 | -0.34669300 | 2.53919200  |
| H  | 0.15835200  | -3.91372800 | 1.12522700  |
| H  | 1.71433400  | -3.81541300 | 3.04627800  |
| N  | -1.84508000 | -2.21872300 | 0.64917900  |
| H  | -2.37995700 | -1.37415900 | 0.45493700  |
| H  | -1.50067500 | -2.68867600 | -0.18248000 |
| H  | 1.52366800  | -1.98518500 | 4.74705000  |
| Sb | 2.11592600  | -3.27552400 | -1.85337000 |
| F  | 1.41207800  | -3.47527500 | -3.63924000 |
| F  | 1.76612600  | -5.12654900 | -1.46373100 |
| F  | 3.88611200  | -3.69129600 | -2.47717400 |
| F  | 2.80086200  | -3.02885600 | -0.05858100 |
| F  | 2.43219600  | -1.39013200 | -2.21879000 |
| F  | 0.33746500  | -2.82591100 | -1.22867200 |

TS2

|                                              |                             |
|----------------------------------------------|-----------------------------|
| Zero-point correction=                       | 0.517669 (Hartree/Particle) |
| Thermal correction to Energy=                | 0.555882                    |
| Thermal correction to Enthalpy=              | 0.556827                    |
| Thermal correction to Gibbs Free Energy=     | 0.443396                    |
| Sum of electronic and zero-point Energies=   | -2156.568762                |
| Sum of electronic and thermal Energies=      | -2156.530549                |
| Sum of electronic and thermal Enthalpies=    | -2156.529605                |
| Sum of electronic and thermal Free Energies= | -2156.643035                |

|    |             |             |             |
|----|-------------|-------------|-------------|
| Sb | 2.19341400  | -2.20213900 | -0.53864900 |
| F  | 3.66204700  | -0.94319200 | -0.38207300 |
| F  | 3.12090200  | -3.11563400 | -1.95457900 |
| F  | 3.00258200  | -3.34876200 | 0.77495300  |
| F  | 0.69015800  | -3.39862300 | -0.72531700 |
| F  | 1.23849300  | -1.27501700 | 0.87529100  |
| F  | 1.39011600  | -1.00109900 | -1.83479200 |
| Ag | 0.05491700  | 1.38139500  | -0.35473600 |
| C  | -2.00502900 | 1.01331900  | -0.51555700 |
| C  | -2.80381900 | 2.26493400  | -0.50718700 |
| O  | -3.01628000 | 2.99182400  | 0.45178100  |

|   |             |             |             |
|---|-------------|-------------|-------------|
| O | -3.20047900 | 2.55824000  | -1.75412500 |
| C | -3.80180600 | 3.85455500  | -1.99106300 |
| H | -4.51155100 | 4.07425400  | -1.17961500 |
| H | -4.36107400 | 3.72673300  | -2.92838600 |
| C | -2.74598700 | 4.93581700  | -2.11399000 |
| H | -3.22698400 | 5.89891600  | -2.34924900 |
| H | -2.19105400 | 5.04992900  | -1.17032400 |
| H | -2.03341500 | 4.69800300  | -2.91969400 |
| C | -2.64168300 | -0.23047500 | -0.86519200 |
| C | -1.85057800 | -1.38830100 | -1.07908200 |
| C | -4.05413100 | -0.36974700 | -0.94295500 |
| C | -2.43039700 | -2.61739000 | -1.37093000 |
| H | -0.76883300 | -1.29982100 | -1.02031600 |
| C | -4.63342000 | -1.60205700 | -1.23196800 |
| H | -4.69353700 | 0.49981400  | -0.78211100 |
| C | -3.82540700 | -2.72675400 | -1.44656600 |
| H | -1.78983800 | -3.48735400 | -1.52876800 |
| H | -5.72099600 | -1.69346500 | -1.28137400 |
| H | -4.28660100 | -3.69222700 | -1.67082700 |
| C | 5.12482500  | 2.19302000  | 2.20572800  |
| C | 5.35273000  | 3.00958000  | 0.92989700  |
| C | 4.49671400  | 2.47161500  | -0.22022600 |
| C | 3.00246300  | 2.43007700  | 0.13288200  |
| C | 2.76771700  | 1.62274900  | 1.42499900  |
| C | 3.63785700  | 2.15733600  | 2.57154900  |
| H | 4.63651600  | 3.07908300  | -1.13048900 |
| H | 5.08863200  | 4.06613600  | 1.12009100  |
| H | 6.41808800  | 2.99660500  | 0.64584500  |
| H | 5.48223600  | 1.15988900  | 2.04463500  |
| H | 5.71276900  | 2.60624400  | 3.04217300  |
| H | 2.64197900  | 3.45984600  | 0.31022400  |
| H | 3.06505500  | 0.58693700  | 1.20775800  |
| H | 3.29460300  | 3.17849500  | 2.82498700  |
| H | 3.46952000  | 1.53330400  | 3.46535200  |
| H | 4.81272000  | 1.44198400  | -0.46686900 |
| N | 1.33718600  | 1.58515100  | 1.76661000  |
| H | 1.15215000  | 0.77510700  | 2.35887800  |
| H | 1.07520100  | 2.41138700  | 2.30924200  |
| N | 2.19411700  | 1.87200100  | -0.97009700 |
| H | 2.26331900  | 2.47457700  | -1.79210900 |
| H | 2.58487600  | 0.96780900  | -1.25046800 |
| C | -3.60956000 | -2.67535600 | 2.31291600  |
| C | -2.68691500 | -1.64759200 | 2.12684800  |
| C | -3.12452900 | -0.30719300 | 2.09289600  |

|   |             |             |            |
|---|-------------|-------------|------------|
| C | -4.49821600 | -0.02248300 | 2.24500100 |
| C | -5.40761300 | -1.06044500 | 2.44288700 |
| C | -4.97253200 | -2.39131600 | 2.47150200 |
| H | -3.26114100 | -3.71126300 | 2.32651000 |
| H | -1.62505900 | -1.86610900 | 1.98641400 |
| H | -4.83601300 | 1.01582100  | 2.20252100 |
| H | -6.46895700 | -0.82834700 | 2.56432600 |
| N | -2.22711800 | 0.70326700  | 1.82926100 |
| H | -1.23718100 | 0.51827500  | 1.94294300 |
| H | -2.51879400 | 1.67945900  | 1.86699100 |
| H | -5.68986700 | -3.20236500 | 2.61803900 |

int2

|                                              |                             |
|----------------------------------------------|-----------------------------|
| Zero-point correction=                       | 0.521873 (Hartree/Particle) |
| Thermal correction to Energy=                | 0.560669                    |
| Thermal correction to Enthalpy=              | 0.561613                    |
| Thermal correction to Gibbs Free Energy=     | 0.444886                    |
| Sum of electronic and zero-point Energies=   | -2156.604719                |
| Sum of electronic and thermal Energies=      | -2156.565924                |
| Sum of electronic and thermal Enthalpies=    | -2156.564979                |
| Sum of electronic and thermal Free Energies= | -2156.681707                |

|    |             |             |             |
|----|-------------|-------------|-------------|
| Sb | -1.39085300 | -2.47676200 | -0.13281400 |
| F  | -3.26762300 | -2.02787000 | -0.14952200 |
| F  | -1.69361400 | -4.03571800 | 0.94463600  |
| F  | -1.56078000 | -3.53082200 | -1.72845600 |
| F  | 0.53672000  | -2.76524000 | -0.09814900 |
| F  | -1.00261300 | -0.92037200 | -1.23088700 |
| F  | -1.17853200 | -1.42533800 | 1.48328800  |
| Ag | -0.31796400 | 1.43341000  | 0.39846400  |
| C  | 1.85125400  | 0.94092800  | -0.05387300 |
| C  | 2.02493600  | 2.14910200  | -0.86145000 |
| O  | 1.91370700  | 2.17429200  | -2.08854000 |
| O  | 2.24393600  | 3.26664300  | -0.13440600 |
| C  | 2.05030800  | 4.53413000  | -0.79163500 |
| H  | 2.54139800  | 4.51599300  | -1.77621000 |
| H  | 2.57076500  | 5.26032500  | -0.15098800 |
| C  | 0.57431700  | 4.86710600  | -0.91993600 |
| H  | 0.45351000  | 5.86955000  | -1.36141100 |
| H  | 0.06639200  | 4.13950800  | -1.57053900 |
| H  | 0.08365000  | 4.86027600  | 0.06673600  |
| C  | 2.58781900  | 0.66504300  | 1.22053700  |

|   |             |             |             |
|---|-------------|-------------|-------------|
| C | 2.17439500  | -0.41522700 | 2.03001400  |
| C | 3.72321300  | 1.39223500  | 1.62366300  |
| C | 2.86616000  | -0.75250800 | 3.19390500  |
| H | 1.29605400  | -0.99635400 | 1.73931200  |
| C | 4.40214200  | 1.06782500  | 2.80318600  |
| H | 4.07738100  | 2.22105600  | 1.01054600  |
| C | 3.98199600  | -0.00621700 | 3.59319100  |
| H | 2.52395500  | -1.59697100 | 3.79838700  |
| H | 5.27738000  | 1.65409700  | 3.09716700  |
| H | 4.51873300  | -0.26166900 | 4.51066200  |
| C | -5.81143100 | 1.04877000  | -0.92531700 |
| C | -6.01099600 | 1.33874400  | 0.56540400  |
| C | -4.74941400 | 0.98627000  | 1.35793100  |
| C | -3.49478600 | 1.70008000  | 0.83059800  |
| C | -3.30618600 | 1.43392200  | -0.67769600 |
| C | -4.58086600 | 1.78803600  | -1.45831800 |
| H | -4.87594900 | 1.22356500  | 2.42769200  |
| H | -6.24353400 | 2.41089200  | 0.70178800  |
| H | -6.87292200 | 0.77539300  | 0.95999800  |
| H | -5.66913300 | -0.03783300 | -1.06786500 |
| H | -6.70785700 | 1.33255200  | -1.50144500 |
| H | -3.61519300 | 2.79134200  | 0.95840800  |
| H | -3.11323400 | 0.35571000  | -0.79437300 |
| H | -4.74385900 | 2.88025700  | -1.38759600 |
| H | -4.41833300 | 1.55939000  | -2.52527400 |
| H | -4.56717300 | -0.10179100 | 1.28758400  |
| N | -2.11426900 | 2.13613500  | -1.17226200 |
| H | -1.91537200 | 1.85794200  | -2.13431900 |
| H | -2.28450200 | 3.14474900  | -1.19925500 |
| N | -2.29180300 | 1.30351900  | 1.59106700  |
| H | -2.29173600 | 1.75305900  | 2.50791500  |
| H | -2.32015400 | 0.29753600  | 1.77663500  |
| C | 4.86179100  | -2.56112900 | -0.84175000 |
| C | 3.57803500  | -2.04057400 | -0.64962800 |
| C | 3.24524900  | -0.82328800 | -1.24487500 |
| C | 4.16365400  | -0.11701600 | -2.02614700 |
| C | 5.44196700  | -0.64934100 | -2.21161100 |
| C | 5.79406300  | -1.86764600 | -1.61896000 |
| H | 5.12942200  | -3.51363100 | -0.37818000 |
| H | 2.84163100  | -2.57556100 | -0.04944500 |
| H | 3.87681600  | 0.83103500  | -2.48188600 |
| H | 6.16553900  | -0.10720800 | -2.82528200 |
| N | 1.91030200  | -0.25082900 | -1.00139000 |
| H | 1.27863100  | -0.99842800 | -0.68608100 |

|   |            |             |             |
|---|------------|-------------|-------------|
| H | 1.52056100 | 0.10069000  | -1.89095700 |
| H | 6.79648300 | -2.27733600 | -1.76589300 |

int3

|                                              |                             |
|----------------------------------------------|-----------------------------|
| Zero-point correction=                       | 0.639891 (Hartree/Particle) |
| Thermal correction to Energy=                | 0.685971                    |
| Thermal correction to Enthalpy=              | 0.686915                    |
| Thermal correction to Gibbs Free Energy=     | 0.552481                    |
| Sum of electronic and zero-point Energies=   | -2443.920957                |
| Sum of electronic and thermal Energies=      | -2443.874878                |
| Sum of electronic and thermal Enthalpies=    | -2443.873934                |
| Sum of electronic and thermal Free Energies= | -2444.008367                |

|   |             |             |             |
|---|-------------|-------------|-------------|
| C | -2.32062600 | -0.13187800 | -0.34197100 |
| C | -2.20817500 | -0.60247700 | 0.96817100  |
| O | -1.41667700 | -1.47743700 | 1.41173800  |
| O | -3.07566800 | 0.00020300  | 1.84410400  |
| C | -2.87139400 | -0.21349300 | 3.24523500  |
| H | -1.84998000 | 0.10177900  | 3.51839400  |
| H | -2.95692700 | -1.28790400 | 3.47643600  |
| C | -3.91442700 | 0.59781200  | 3.98454700  |
| H | -3.77404800 | 0.49171200  | 5.07180900  |
| H | -3.83423500 | 1.66557200  | 3.72539900  |
| H | -4.93287400 | 0.25468900  | 3.73755800  |
| C | -1.50579200 | -0.57097600 | -1.46527200 |
| C | -1.10312600 | 0.31668200  | -2.49388300 |
| C | -1.06996700 | -1.91738700 | -1.56937300 |
| C | -0.30002100 | -0.11222900 | -3.55158900 |
| H | -1.37864700 | 1.37271000  | -2.44503400 |
| C | -0.26298000 | -2.33797900 | -2.62826200 |
| H | -1.40258700 | -2.63950400 | -0.82329100 |
| C | 0.13499300  | -1.44072800 | -3.62660500 |
| H | 0.01104800  | 0.61023900  | -4.31127200 |
| H | 0.05305200  | -3.38430100 | -2.67536700 |
| H | 0.77255000  | -1.77098700 | -4.45064500 |
| C | -1.17212400 | 3.88751600  | 0.72392100  |
| C | -1.52502700 | 2.60881100  | 0.28226100  |
| C | -2.84669600 | 2.34855900  | -0.05639200 |
| C | -3.83592300 | 3.32846300  | 0.04954000  |
| C | -3.47838300 | 4.60163400  | 0.50380900  |
| C | -2.14747000 | 4.88329800  | 0.83856000  |
| H | -0.12703300 | 4.09338100  | 0.96689400  |



|    |             |             |             |
|----|-------------|-------------|-------------|
| H  | -0.77926600 | 1.82341100  | 0.19462600  |
| H  | -4.87046000 | 3.09782900  | -0.21754100 |
| H  | -4.24360800 | 5.37660400  | 0.59510100  |
| N  | -3.23411100 | 1.00799200  | -0.55010700 |
| H  | -6.51928200 | 0.79967900  | 0.24789100  |
| H  | -3.42849400 | 1.08256500  | -1.55742200 |
| C  | -6.65669700 | -2.56117300 | -1.89792900 |
| C  | -6.59640300 | -1.29903300 | -1.30036200 |
| C  | -5.87564600 | -1.11305700 | -0.10824200 |
| C  | -5.21799100 | -2.21319100 | 0.47195800  |
| C  | -5.28329700 | -3.46967700 | -0.13303100 |
| C  | -6.00069500 | -3.65425000 | -1.32142200 |
| H  | -7.22314000 | -2.68830000 | -2.82464200 |
| H  | -7.10624300 | -0.44658700 | -1.75858300 |
| H  | -4.64943900 | -2.07272100 | 1.39342200  |
| H  | -4.76491700 | -4.31307400 | 0.33128700  |
| N  | -5.73754800 | 0.17660900  | 0.44840100  |
| H  | -5.52893400 | 0.17688900  | 1.44591100  |
| H  | -4.18981700 | 0.76758500  | -0.13775200 |
| Sb | 2.42334900  | 1.98501500  | -0.55497500 |
| F  | 3.90469000  | 1.28824700  | 0.48914400  |
| F  | 2.41728200  | 3.59587300  | 0.50871700  |
| F  | 3.66491300  | 2.77542700  | -1.79258800 |
| F  | 0.93252900  | 2.65565200  | -1.57577000 |
| F  | 2.39208500  | 0.35919900  | -1.60194700 |
| F  | 1.22128300  | 1.17815300  | 0.74205400  |
| Ag | 0.76801100  | -1.60302300 | 0.96414200  |
| C  | 6.26920800  | -2.47274300 | -0.28751700 |
| C  | 6.38731700  | -2.55108800 | 1.23787500  |
| C  | 5.30128600  | -1.70668800 | 1.91053400  |
| C  | 3.88389100  | -2.10154700 | 1.46515500  |
| C  | 3.76653100  | -2.04368500 | -0.07305100 |
| C  | 4.86534600  | -2.87805800 | -0.74573000 |
| H  | 5.36816300  | -1.78440000 | 3.00915800  |
| H  | 6.28361700  | -3.60409800 | 1.55858000  |
| H  | 7.38531300  | -2.21741100 | 1.56787600  |
| H  | 6.47147000  | -1.43685700 | -0.61486000 |
| H  | 7.02685800  | -3.11234800 | -0.77039100 |
| H  | 3.68376600  | -3.14258900 | 1.77959600  |
| H  | 3.90031700  | -0.98997500 | -0.35566800 |
| H  | 4.69206300  | -3.94443600 | -0.50530400 |
| H  | 4.76592400  | -2.77801100 | -1.83969000 |
| H  | 5.44936200  | -0.64175700 | 1.65444300  |
| N  | 2.41752900  | -2.42605400 | -0.52174800 |

|   |             |             |             |
|---|-------------|-------------|-------------|
| H | 2.21596500  | -2.00513500 | -1.42962600 |
| H | 2.35173700  | -3.43865700 | -0.64682700 |
| N | 2.85097600  | -1.25261100 | 2.08351900  |
| H | 2.86104600  | -1.36791300 | 3.09791200  |
| H | 3.07255900  | -0.26916900 | 1.90569000  |
| H | -1.87254900 | 5.88182100  | 1.18773100  |
| H | -6.04810600 | -4.63926700 | -1.79207000 |

TS3

|                                              |                             |
|----------------------------------------------|-----------------------------|
| Zero-point correction=                       | 0.635546 (Hartree/Particle) |
| Thermal correction to Energy=                | 0.680863                    |
| Thermal correction to Enthalpy=              | 0.681807                    |
| Thermal correction to Gibbs Free Energy=     | 0.550692                    |
| Sum of electronic and zero-point Energies=   | -2443.887506                |
| Sum of electronic and thermal Energies=      | -2443.842189                |
| Sum of electronic and thermal Enthalpies=    | -2443.841245                |
| Sum of electronic and thermal Free Energies= | -2443.972361                |

|    |             |             |             |
|----|-------------|-------------|-------------|
| Sb | 1.36549400  | 1.68761100  | 2.49047200  |
| F  | 3.26602200  | 1.62501900  | 2.13870600  |
| F  | 1.69129600  | 2.36570900  | 4.25945700  |
| F  | 1.28203100  | 3.48203700  | 1.78997700  |
| F  | -0.54541300 | 1.72965500  | 2.82597200  |
| F  | 1.01516500  | 0.96298400  | 0.72630300  |
| F  | 1.44389900  | -0.12757400 | 3.17122500  |
| Ag | 0.74330800  | -1.47074600 | -1.25158500 |
| C  | -2.46648900 | -0.92819400 | -0.37273800 |
| C  | -2.33402300 | -1.28938000 | -1.78394400 |
| O  | -1.28009000 | -1.69223500 | -2.28958600 |
| O  | -3.42884000 | -1.07660600 | -2.52354100 |
| C  | -3.33875800 | -1.19192700 | -3.96774500 |
| H  | -2.38333600 | -0.75564300 | -4.29377500 |
| H  | -4.16163300 | -0.56589000 | -4.33928100 |
| C  | -3.48478200 | -2.63200000 | -4.41462800 |
| H  | -3.48238100 | -2.67555400 | -5.51559500 |
| H  | -2.65162100 | -3.24578400 | -4.04137800 |
| H  | -4.43380200 | -3.05972600 | -4.05415600 |
| C  | -1.87930100 | -1.88397300 | 0.62498100  |
| C  | -1.90452400 | -3.27300800 | 0.40003400  |
| C  | -1.29467300 | -1.40564800 | 1.80889200  |
| C  | -1.34154500 | -4.15682600 | 1.32343700  |
| H  | -2.36103100 | -3.66495400 | -0.51223400 |

|   |             |             |             |
|---|-------------|-------------|-------------|
| C | -0.74104400 | -2.28931200 | 2.73943000  |
| H | -1.25646800 | -0.33461700 | 2.00223900  |
| C | -0.75880300 | -3.66625200 | 2.49835400  |
| H | -1.36353900 | -5.23230300 | 1.12846300  |
| H | -0.26846700 | -1.88887100 | 3.63798700  |
| H | -0.31724200 | -4.35665400 | 3.22194600  |
| C | 5.88743700  | -0.27421600 | 0.77546800  |
| C | 5.65557900  | -1.54238100 | 1.60297300  |
| C | 4.15784200  | -1.79050300 | 1.79995600  |
| C | 3.38506300  | -1.86464900 | 0.47237500  |
| C | 3.64707300  | -0.60693100 | -0.38494300 |
| C | 5.15207300  | -0.36405100 | -0.56529700 |
| H | 3.98300200  | -2.72169700 | 2.36526200  |
| H | 6.10889300  | -2.40701500 | 1.08370500  |
| H | 6.15607200  | -1.46364500 | 2.58253600  |
| H | 5.50655500  | 0.59738700  | 1.33579300  |
| H | 6.96465500  | -0.10759000 | 0.60846100  |
| H | 3.74218200  | -2.73712000 | -0.10574300 |
| H | 3.21635500  | 0.24672900  | 0.15634600  |
| H | 5.57375100  | -1.19316100 | -1.16505500 |
| H | 5.29514500  | 0.55902300  | -1.15225600 |
| H | 3.72493000  | -0.96888700 | 2.39464700  |
| N | 2.93482400  | -0.69466000 | -1.67469900 |
| H | 2.94899000  | 0.21484800  | -2.13987800 |
| H | 3.43000200  | -1.33432600 | -2.30211300 |
| N | 1.93959400  | -2.04897700 | 0.69110500  |
| H | 1.75072100  | -2.97287900 | 1.08151600  |
| H | 1.61187200  | -1.38314200 | 1.39412900  |
| C | -5.19278900 | -1.05122200 | 3.38997900  |
| C | -4.48758400 | -0.44358900 | 2.34673900  |
| C | -4.59421700 | -0.97364000 | 1.06048700  |
| C | -5.38037100 | -2.09682100 | 0.79638700  |
| C | -6.08229600 | -2.69573700 | 1.84524200  |
| C | -5.98823000 | -2.17451900 | 3.14117100  |
| H | -5.11603900 | -0.64405900 | 4.40088600  |
| H | -3.85522100 | 0.42811000  | 2.52842900  |
| H | -5.43435600 | -2.49637800 | -0.21943900 |
| H | -6.70274100 | -3.57338600 | 1.64876500  |
| N | -3.83709500 | -0.36470600 | -0.02187100 |
| H | -3.54937900 | 0.66268600  | 0.17327800  |
| H | -6.53637000 | -2.64701500 | 3.95996000  |
| C | -0.67513000 | 3.35724500  | -0.99942800 |
| C | -0.29526200 | 4.05964900  | -2.14253200 |
| C | -0.91571300 | 3.82736300  | -3.37981600 |

|   |             |             |             |
|---|-------------|-------------|-------------|
| C | -1.94046400 | 2.87353500  | -3.44156800 |
| C | -2.33729800 | 2.17028500  | -2.30305300 |
| C | -1.71186800 | 2.38224600  | -1.04145800 |
| H | -0.16379200 | 3.54168000  | -0.05214100 |
| H | 0.50711000  | 4.80081000  | -2.06698200 |
| H | -0.60954600 | 4.37937100  | -4.27208300 |
| H | -2.44639100 | 2.67623900  | -4.39233200 |
| H | -3.14990500 | 1.44344700  | -2.37413000 |
| N | -2.09748900 | 1.64351300  | 0.05025600  |
| H | -1.93678500 | 0.26755100  | -0.23840300 |
| H | -1.55442800 | 1.88051200  | 0.87989000  |
| H | -4.40046800 | -0.35159800 | -0.88240200 |

Pr

|                                              |                             |
|----------------------------------------------|-----------------------------|
| Zero-point correction=                       | 0.638959 (Hartree/Particle) |
| Thermal correction to Energy=                | 0.685702                    |
| Thermal correction to Enthalpy=              | 0.686646                    |
| Thermal correction to Gibbs Free Energy=     | 0.549843                    |
| Sum of electronic and zero-point Energies=   | -2443.942567                |
| Sum of electronic and thermal Energies=      | -2443.895824                |
| Sum of electronic and thermal Enthalpies=    | -2443.894880                |
| Sum of electronic and thermal Free Energies= | -2444.031683                |

|   |             |             |             |
|---|-------------|-------------|-------------|
| C | -2.80917000 | -1.12865300 | 0.09554400  |
| C | -2.70542400 | -0.57437700 | 1.53908400  |
| O | -1.68339600 | -0.27503700 | 2.12719400  |
| O | -3.90548100 | -0.47102800 | 2.09544700  |
| C | -3.98445200 | 0.02428500  | 3.46416400  |
| H | -3.66586700 | 1.07861900  | 3.46015900  |
| H | -3.27100400 | -0.54606000 | 4.07774200  |
| C | -5.40801600 | -0.14522000 | 3.94030700  |
| H | -5.48914800 | 0.23095700  | 4.97207600  |
| H | -6.11217300 | 0.41547600  | 3.30785900  |
| H | -5.70000600 | -1.20709200 | 3.93636600  |
| C | -1.45721600 | -1.50878100 | -0.50807500 |
| C | -1.13117900 | -1.15771100 | -1.82430600 |
| C | -0.54000300 | -2.28386700 | 0.23246800  |
| C | 0.08775500  | -1.55280700 | -2.38640600 |
| H | -1.83459600 | -0.57087800 | -2.41561100 |
| C | 0.67896500  | -2.67979800 | -0.33467800 |
| H | -0.79187500 | -2.60957600 | 1.24485000  |
| C | 0.99782700  | -2.30914000 | -1.64541000 |

|   |             |             |             |
|---|-------------|-------------|-------------|
| H | 0.32912500  | -1.25775800 | -3.41091700 |
| H | 1.39114800  | -3.26597400 | 0.24882800  |
| H | 1.96011500  | -2.59715500 | -2.06812700 |
| C | -2.22407900 | 3.14708700  | -0.85003500 |
| C | -2.36052800 | 1.79184400  | -0.53230500 |
| C | -3.46175900 | 1.05002600  | -1.01038200 |
| C | -4.41247900 | 1.71674800  | -1.81963000 |
| C | -4.26324400 | 3.06735900  | -2.12733100 |
| C | -3.16839900 | 3.80037700  | -1.64632400 |
| H | -1.35683400 | 3.69208500  | -0.46581900 |
| H | -1.59588000 | 1.31634800  | 0.07853900  |
| H | -5.26923900 | 1.15622300  | -2.20288400 |
| H | -5.01454600 | 3.55491800  | -2.75515200 |
| N | -3.64517300 | -0.29213500 | -0.72952100 |
| H | -4.48350500 | -0.72662300 | -1.09633600 |
| H | -3.37567200 | -2.06496900 | 0.23084000  |

TS4

|                                              |                             |
|----------------------------------------------|-----------------------------|
| Zero-point correction=                       | 0.517074 (Hartree/Particle) |
| Thermal correction to Energy=                | 0.555378                    |
| Thermal correction to Enthalpy=              | 0.556323                    |
| Thermal correction to Gibbs Free Energy=     | 0.441578                    |
| Sum of electronic and zero-point Energies=   | -2156.596867                |
| Sum of electronic and thermal Energies=      | -2156.558563                |
| Sum of electronic and thermal Enthalpies=    | -2156.557619                |
| Sum of electronic and thermal Free Energies= | -2156.672363                |

|    |             |             |             |
|----|-------------|-------------|-------------|
| Sb | -1.09124900 | -2.58904900 | -0.03909600 |
| F  | -2.89684000 | -1.90522400 | 0.11471200  |
| F  | -1.50764700 | -4.06094000 | 1.12215300  |
| F  | -1.58061500 | -3.62420500 | -1.58089200 |
| F  | 0.74829300  | -3.16729500 | -0.18688500 |
| F  | -0.65089200 | -1.09656400 | -1.21856000 |
| F  | -0.60831800 | -1.50363700 | 1.49036800  |
| Ag | -0.39714500 | 1.38521300  | 0.37116100  |
| C  | 1.88344700  | 1.13029000  | -0.04661000 |
| C  | 1.89928800  | 2.38712200  | -0.73333700 |
| O  | 1.83308600  | 2.33168300  | -2.01481000 |
| O  | 1.97627900  | 3.54010000  | -0.09810800 |
| C  | 1.67323100  | 4.75852800  | -0.82979300 |
| H  | 2.24437800  | 4.76193100  | -1.76958400 |
| H  | 2.05398300  | 5.55722300  | -0.17939500 |

|   |             |             |             |
|---|-------------|-------------|-------------|
| C | 0.18385100  | 4.89746400  | -1.07585800 |
| H | -0.01716600 | 5.87145800  | -1.54974800 |
| H | -0.17953100 | 4.10650400  | -1.74797200 |
| H | -0.37721600 | 4.84896900  | -0.12914200 |
| C | 2.43426300  | 0.81400800  | 1.29255600  |
| C | 2.43071000  | -0.52790400 | 1.73484200  |
| C | 2.97673400  | 1.79136200  | 2.15439200  |
| C | 2.94330900  | -0.87430200 | 2.98515100  |
| H | 1.99968200  | -1.30499600 | 1.10303000  |
| C | 3.48025200  | 1.43758300  | 3.40921500  |
| H | 3.00418300  | 2.83408900  | 1.83986700  |
| C | 3.46994300  | 0.10516400  | 3.83544100  |
| H | 2.92284000  | -1.92163700 | 3.29886300  |
| H | 3.89355100  | 2.21600700  | 4.05702500  |
| H | 3.86748900  | -0.16704900 | 4.81655800  |
| C | -5.86675800 | 0.95445300  | -1.10005000 |
| C | -6.08314100 | 1.16387800  | 0.40159400  |
| C | -4.84375800 | 0.73511500  | 1.19130300  |
| C | -3.56520300 | 1.44999700  | 0.72716400  |
| C | -3.35505500 | 1.27602100  | -0.79252700 |
| C | -4.61131600 | 1.69277800  | -1.57193300 |
| H | -4.98313500 | 0.91546200  | 2.27060400  |
| H | -6.29200600 | 2.23209700  | 0.59529900  |
| H | -6.96493200 | 0.60104600  | 0.75019100  |
| H | -5.75158600 | -0.12547000 | -1.30412300 |
| H | -6.74602900 | 1.29455700  | -1.67209000 |
| H | -3.66226200 | 2.53336300  | 0.92381300  |
| H | -3.16389700 | 0.20487500  | -0.96730200 |
| H | -4.75443100 | 2.78254500  | -1.44379400 |
| H | -4.43519600 | 1.51971500  | -2.64709300 |
| H | -4.68370900 | -0.35044400 | 1.06369200  |
| N | -2.15249700 | 2.00355200  | -1.22748600 |
| H | -1.92340000 | 1.76101300  | -2.19275500 |
| H | -2.33352200 | 3.01071500  | -1.22694200 |
| N | -2.38177500 | 0.97815300  | 1.47460300  |
| H | -2.42413400 | 1.30184700  | 2.44236100  |
| H | -2.39754800 | -0.04355200 | 1.52430500  |
| C | 4.57243600  | -2.50473800 | -1.83495100 |
| C | 3.33994300  | -1.88779100 | -1.60066300 |
| C | 3.29378200  | -0.51653100 | -1.32781000 |
| C | 4.47397500  | 0.23565200  | -1.27900900 |
| C | 5.70118100  | -0.39106800 | -1.50926000 |
| C | 5.75623400  | -1.76111500 | -1.79039100 |
| H | 4.60422500  | -3.57735000 | -2.04310600 |

|   |            |             |             |
|---|------------|-------------|-------------|
| H | 2.41569700 | -2.46851100 | -1.60238600 |
| H | 4.43699400 | 1.30383500  | -1.05594900 |
| H | 6.62081400 | 0.19830400  | -1.46838200 |
| N | 2.01734800 | 0.12814000  | -1.13322400 |
| H | 1.24764000 | -0.54523300 | -1.16273000 |
| H | 1.86273000 | 1.11434700  | -2.00429700 |
| H | 6.71863600 | -2.24738500 | -1.96827600 |

int4

|                                              |                             |
|----------------------------------------------|-----------------------------|
| Zero-point correction=                       | 0.520555 (Hartree/Particle) |
| Thermal correction to Energy=                | 0.559367                    |
| Thermal correction to Enthalpy=              | 0.560311                    |
| Thermal correction to Gibbs Free Energy=     | 0.443474                    |
| Sum of electronic and zero-point Energies=   | -2156.602272                |
| Sum of electronic and thermal Energies=      | -2156.563460                |
| Sum of electronic and thermal Enthalpies=    | -2156.562516                |
| Sum of electronic and thermal Free Energies= | -2156.679353                |

|    |             |             |             |
|----|-------------|-------------|-------------|
| Sb | 1.56786200  | 2.41363900  | -0.24378400 |
| F  | 3.35236300  | 1.71228200  | -0.48876400 |
| F  | 2.25332800  | 3.96446100  | 0.65781400  |
| F  | 1.65902900  | 3.31642700  | -1.93786500 |
| F  | -0.25319300 | 3.01912500  | 0.01025500  |
| F  | 0.83736800  | 0.84841400  | -1.14820900 |
| F  | 1.45984400  | 1.47789900  | 1.45127700  |
| Ag | -0.00538200 | -1.74349000 | -0.37124000 |
| C  | -2.17172800 | -0.80326000 | -0.06299500 |
| C  | -2.64006500 | -1.87188400 | -0.84194200 |
| O  | -2.90252800 | -1.69650500 | -2.13253900 |
| O  | -2.92430200 | -3.06365100 | -0.35035400 |
| C  | -2.99544300 | -4.21436900 | -1.23682900 |
| H  | -3.68788700 | -3.99116600 | -2.06123200 |
| H  | -3.44041900 | -4.99615700 | -0.60728300 |
| C  | -1.62496700 | -4.61900300 | -1.74116900 |
| H  | -1.71700100 | -5.54217600 | -2.33516100 |
| H  | -1.18836800 | -3.84182000 | -2.38736500 |
| H  | -0.93788300 | -4.81411200 | -0.90237900 |
| C  | -2.08661200 | -0.75452900 | 1.42722100  |
| C  | -1.55985600 | 0.41175600  | 2.02504000  |
| C  | -2.47636700 | -1.81121000 | 2.27947700  |
| C  | -1.40294700 | 0.50633800  | 3.40808300  |

|   |             |             |             |
|---|-------------|-------------|-------------|
| H | -1.24107300 | 1.24633900  | 1.40188500  |
| C | -2.32081900 | -1.70728500 | 3.66446900  |
| H | -2.89955000 | -2.72051700 | 1.85754600  |
| C | -1.77895000 | -0.55337100 | 4.24060700  |
| H | -0.97432600 | 1.41770700  | 3.83352300  |
| H | -2.63174700 | -2.54171900 | 4.29952900  |
| H | -1.65458000 | -0.47981800 | 5.32407700  |
| C | 5.55094800  | -1.26090600 | -0.51904000 |
| C | 5.49369200  | -1.49914100 | 0.99307400  |
| C | 4.11162200  | -1.14084000 | 1.54553300  |
| C | 2.96983400  | -1.88768000 | 0.83602700  |
| C | 3.04996500  | -1.66782100 | -0.69094400 |
| C | 4.43823300  | -2.03690700 | -1.23036000 |
| H | 4.05305200  | -1.34653000 | 2.62750900  |
| H | 5.71051600  | -2.56249600 | 1.20441400  |
| H | 6.26984100  | -0.90942700 | 1.50862600  |
| H | 5.42233200  | -0.18277600 | -0.72129200 |
| H | 6.53519800  | -1.54990900 | -0.92332800 |
| H | 3.08129000  | -2.97328600 | 1.01381300  |
| H | 2.87665100  | -0.59750500 | -0.87707100 |
| H | 4.59453800  | -3.12364800 | -1.09300600 |
| H | 4.46201400  | -1.84523800 | -2.31657900 |
| H | 3.93258000  | -0.05931900 | 1.41222500  |
| N | 1.96586200  | -2.39963200 | -1.37971900 |
| H | 1.98067800  | -2.17861300 | -2.37747100 |
| H | 2.13166300  | -3.40828300 | -1.31667300 |
| N | 1.64965500  | -1.49207800 | 1.35751600  |
| H | 1.47014800  | -1.93702300 | 2.25812800  |
| H | 1.63175600  | -0.48425900 | 1.53472500  |
| C | -4.29341600 | 3.51873100  | -0.91578100 |
| C | -3.19516400 | 2.66204700  | -0.99715400 |
| C | -3.32685700 | 1.30244700  | -0.65381600 |
| C | -4.57858600 | 0.82775400  | -0.22128800 |
| C | -5.67091500 | 1.69701500  | -0.14279500 |
| C | -5.54117100 | 3.04544200  | -0.48995900 |
| H | -4.16874500 | 4.57198600  | -1.18270400 |
| H | -2.21961100 | 3.04083300  | -1.30769000 |
| H | -4.70027900 | -0.21981200 | 0.06066800  |
| H | -6.63516700 | 1.30963300  | 0.19816400  |
| N | -2.21838600 | 0.44033600  | -0.79581800 |
| H | -1.33085400 | 0.92969600  | -0.87978000 |
| H | -2.68125900 | -0.74916300 | -2.30371200 |
| H | -6.39808100 | 3.72044700  | -0.42491700 |



TS5

|                                              |                             |
|----------------------------------------------|-----------------------------|
| Zero-point correction=                       | 0.514869 (Hartree/Particle) |
| Thermal correction to Energy=                | 0.553518                    |
| Thermal correction to Enthalpy=              | 0.554462                    |
| Thermal correction to Gibbs Free Energy=     | 0.440091                    |
| Sum of electronic and zero-point Energies=   | -2156.529485                |
| Sum of electronic and thermal Energies=      | -2156.490836                |
| Sum of electronic and thermal Enthalpies=    | -2156.489892                |
| Sum of electronic and thermal Free Energies= | -2156.604262                |

|    |             |             |             |
|----|-------------|-------------|-------------|
| Sb | -0.20317500 | -2.42902300 | 0.01488900  |
| F  | -2.08578600 | -2.49031600 | -0.44351400 |
| F  | -0.31579500 | -4.19971700 | 0.75398600  |
| F  | 0.26899700  | -3.13255700 | -1.71443900 |
| F  | 1.66251400  | -2.32185800 | 0.48495700  |
| F  | -0.10188300 | -0.63330200 | -0.74233100 |
| F  | -0.69985500 | -1.66207100 | 1.72294900  |
| Ag | -1.21693500 | 1.43129600  | 1.27758400  |
| C  | 2.35869900  | 1.70193700  | 0.12290300  |
| C  | 1.81282900  | 2.74441600  | -0.77704400 |
| O  | 2.77657600  | 3.39353000  | -1.30502500 |
| O  | 0.57051800  | 2.99329100  | -1.01448800 |
| C  | 0.18250800  | 4.08195300  | -1.91987600 |
| H  | 0.90657000  | 4.90045800  | -1.80109600 |
| H  | -0.79647800 | 4.40175300  | -1.53913600 |
| C  | 0.11054300  | 3.57699700  | -3.34296500 |
| H  | -0.21872200 | 4.39852400  | -3.99848100 |
| H  | 1.09661400  | 3.23187200  | -3.68949200 |
| H  | -0.61245700 | 2.75132700  | -3.43287200 |
| C  | 1.74504100  | 1.47297300  | 1.44163300  |
| C  | 2.04616000  | 0.30590800  | 2.17511400  |
| C  | 0.85235700  | 2.41254100  | 2.04223600  |
| C  | 1.52780000  | 0.09479400  | 3.45520100  |
| H  | 2.68857100  | -0.45080800 | 1.72538500  |
| C  | 0.31933800  | 2.17759200  | 3.33046200  |
| H  | 0.68454100  | 3.38557700  | 1.57232800  |
| C  | 0.66251200  | 1.02015200  | 4.04572300  |
| H  | 1.79312300  | -0.82059500 | 3.99096600  |
| H  | -0.31756700 | 2.93866500  | 3.78994700  |
| H  | 0.25404400  | 0.84841600  | 5.04400900  |
| C  | -5.02984400 | -0.28869500 | -2.57964700 |
| C  | -5.91384700 | -0.42276700 | -1.33568200 |

|   |             |             |             |
|---|-------------|-------------|-------------|
| C | -5.06168000 | -0.67643600 | -0.08904600 |
| C | -3.99492600 | 0.40821600  | 0.12653400  |
| C | -3.11492700 | 0.56391600  | -1.13289100 |
| C | -3.97490100 | 0.80348500  | -2.38145800 |
| H | -5.69436800 | -0.74378100 | 0.81223700  |
| H | -6.49659300 | 0.50683400  | -1.19935200 |
| H | -6.64508700 | -1.23786900 | -1.46514700 |
| H | -4.52193200 | -1.25141500 | -2.76968700 |
| H | -5.64158100 | -0.06976900 | -3.47064000 |
| H | -4.49428400 | 1.37779400  | 0.30779100  |
| H | -2.57081000 | -0.38343400 | -1.25409400 |
| H | -4.47431300 | 1.78585500  | -2.27967200 |
| H | -3.31206900 | 0.87195900  | -3.26053800 |
| H | -4.53885400 | -1.64447100 | -0.18994500 |
| N | -2.09806000 | 1.60816000  | -0.93834600 |
| H | -1.30409500 | 1.45124100  | -1.55750000 |
| H | -2.47574600 | 2.53063000  | -1.16544500 |
| N | -3.15502700 | 0.12601100  | 1.30638100  |
| H | -3.71767400 | 0.16976200  | 2.15766500  |
| H | -2.80153800 | -0.83305000 | 1.25431000  |
| C | 5.12323800  | -1.96424400 | -1.75795600 |
| C | 3.90750900  | -1.32867600 | -1.51517200 |
| C | 3.86561300  | -0.06983400 | -0.86731100 |
| C | 5.08634900  | 0.51011400  | -0.46270100 |
| C | 6.29838600  | -0.13901300 | -0.71452900 |
| C | 6.33465600  | -1.37673400 | -1.36558800 |
| H | 5.12343400  | -2.93703200 | -2.25852600 |
| H | 2.96794700  | -1.80567500 | -1.80534000 |
| H | 5.07906600  | 1.46932100  | 0.05824100  |
| H | 7.22972700  | 0.33442300  | -0.38940000 |
| N | 2.63373200  | 0.52915100  | -0.66428500 |
| H | 1.83008700  | -0.06624800 | -0.85054100 |
| H | 3.39674500  | 2.74622700  | -0.49507600 |
| H | 7.28610100  | -1.87823200 | -1.55896600 |

TS6

|                                            |                             |
|--------------------------------------------|-----------------------------|
| Zero-point correction=                     | 0.515974 (Hartree/Particle) |
| Thermal correction to Energy=              | 0.554528                    |
| Thermal correction to Enthalpy=            | 0.555472                    |
| Thermal correction to Gibbs Free Energy=   | 0.441511                    |
| Sum of electronic and zero-point Energies= | -2156.533211                |
| Sum of electronic and thermal Energies=    | -2156.494658                |

Sum of electronic and thermal Enthalpies= -2156.493714  
 Sum of electronic and thermal Free Energies= -2156.607675

|    |             |             |             |
|----|-------------|-------------|-------------|
| Sb | 0.11588500  | -2.70048800 | -0.03814400 |
| F  | -1.47315300 | -3.06808700 | -1.06948800 |
| F  | -0.00426500 | -4.41322800 | 0.82729600  |
| F  | 1.23205900  | -3.45864400 | -1.41759500 |
| F  | 1.66419500  | -2.23382600 | 1.01816400  |
| F  | 0.24315300  | -0.97631800 | -0.92833900 |
| F  | -1.00059100 | -1.92582300 | 1.34821000  |
| Ag | -0.67970100 | 1.07167100  | 1.27755100  |
| C  | 1.78575600  | 2.07651700  | -1.15804800 |
| C  | 0.65173300  | 2.40032400  | -2.00777300 |
| O  | 0.33874000  | 1.77407300  | -3.01637800 |
| O  | -0.03860500 | 3.47564500  | -1.57099000 |
| C  | -1.11917900 | 3.96029100  | -2.38684800 |
| H  | -1.67026700 | 3.10962300  | -2.81597800 |
| H  | -0.69608800 | 4.53412900  | -3.22961800 |
| C  | -2.00524600 | 4.82265200  | -1.51466100 |
| H  | -2.83084100 | 5.23839300  | -2.11351700 |
| H  | -2.43715700 | 4.23229300  | -0.69001700 |
| H  | -1.43679200 | 5.65942300  | -1.07894800 |
| C  | 1.77160400  | 2.34744700  | 0.28890500  |
| C  | 1.69855700  | 1.27902600  | 1.22910300  |
| C  | 1.77177100  | 3.66435800  | 0.78201000  |
| C  | 1.61438200  | 1.54804100  | 2.61190600  |
| H  | 1.80979200  | 0.24538300  | 0.89507900  |
| C  | 1.68825400  | 3.92014500  | 2.15520100  |
| H  | 1.83212100  | 4.49285500  | 0.07486300  |
| C  | 1.60567300  | 2.87269700  | 3.07727500  |
| H  | 1.61204900  | 0.71323100  | 3.31760500  |
| H  | 1.69513700  | 4.95518300  | 2.50756300  |
| H  | 1.55156100  | 3.07778900  | 4.14888900  |
| C  | -5.21166200 | -1.00459500 | -1.34779400 |
| C  | -5.92056300 | -0.63525600 | -0.04112900 |
| C  | -4.92559200 | -0.58991000 | 1.12201200  |
| C  | -3.74621600 | 0.35909400  | 0.86094600  |
| C  | -3.04961500 | 0.01559700  | -0.47318300 |
| C  | -4.05986200 | -0.03652300 | -1.62804500 |
| H  | -5.42773900 | -0.29129500 | 2.05773200  |
| H  | -6.39982600 | 0.35466000  | -0.15285900 |
| H  | -6.72709100 | -1.35331700 | 0.18181900  |
| H  | -4.80806600 | -2.03031100 | -1.26845800 |
| H  | -5.92297700 | -1.00606800 | -2.19030500 |

|   |             |             |             |
|---|-------------|-------------|-------------|
| H | -4.12536700 | 1.39387600  | 0.77677000  |
| H | -2.60095700 | -0.98291700 | -0.36204300 |
| H | -4.46090500 | 0.98202800  | -1.78972400 |
| H | -3.52405900 | -0.31946300 | -2.54955300 |
| H | -4.51331000 | -1.60244900 | 1.28927200  |
| N | -1.95059800 | 0.95666000  | -0.73290100 |
| H | -1.36860100 | 0.62557100  | -1.50373600 |
| H | -2.33059600 | 1.86141700  | -1.01650300 |
| N | -2.77985000 | 0.34367800  | 1.97993900  |
| H | -3.19351700 | 0.78069300  | 2.80512500  |
| H | -2.58482000 | -0.62662400 | 2.23960700  |
| C | 4.77999200  | -1.90171600 | -0.68228800 |
| C | 3.66636400  | -1.24996700 | -1.21408600 |
| C | 3.53778400  | 0.13991900  | -1.07590400 |
| C | 4.52915800  | 0.87099000  | -0.40066600 |
| C | 5.64036600  | 0.20521700  | 0.12337300  |
| C | 5.77325400  | -1.18099100 | -0.01013300 |
| H | 4.85988000  | -2.98683500 | -0.78706400 |
| H | 2.88543100  | -1.82096900 | -1.71733800 |
| H | 4.43494100  | 1.95111000  | -0.28163400 |
| H | 6.40709700  | 0.78181200  | 0.64758600  |
| N | 2.40554200  | 0.76623500  | -1.65909000 |
| H | 1.72209800  | 0.13711800  | -2.09055200 |
| H | 2.70482400  | 1.86484300  | -2.09703300 |
| H | 6.64023900  | -1.69540300 | 0.41144900  |

## 4 X-ray Crystallographic Data of Complex A

Crystallography data and structure refinement for **Complex A** (CCDC 2105536)

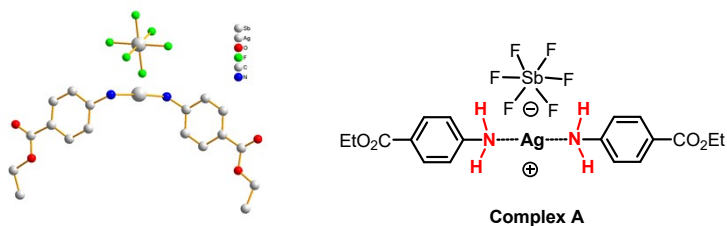

|                                       |                                                                                                                |
|---------------------------------------|----------------------------------------------------------------------------------------------------------------|
| Empirical formula                     | AgC <sub>18</sub> F <sub>6</sub> N <sub>2</sub> O <sub>4</sub> SbH <sub>22</sub>                               |
| Temperature                           | 293(2) K                                                                                                       |
| Formula weight                        | 673.99                                                                                                         |
| Unit cell dimensions                  | a = 8.2459(6) Å    alpha = 90 deg<br>b = 20.336(2) Å    beta = 90 deg.<br>c = 13.7102(12) Å    gamma = 90 deg. |
| Volume                                | 2299.0 (3) Å <sup>3</sup>                                                                                      |
| Z                                     | 4                                                                                                              |
| $\rho_{\text{calc}}$                  | 1.947 g/cm <sup>3</sup>                                                                                        |
| $\mu/\text{mm}^{-1}$                  | 2.102                                                                                                          |
| F(000)                                | 1312.0                                                                                                         |
| Crystal size                          | 0.1 x 0.1 x 0.1 mm                                                                                             |
| Radiation                             | MoK $\alpha$ ( $\lambda$ = 0.71073 Å)                                                                          |
| 2 $\theta$ range for data collection  | 7.17 to 58.672/°                                                                                               |
| Reflections collected                 | 4990                                                                                                           |
| Independent reflections               | 2622 [R <sub>int</sub> = 0.0296, R <sub>sigma</sub> = 0.0419]                                                  |
| Data/restraints/parameters            | 2622/0/152                                                                                                     |
| Goodness-of-fit on F <sup>2</sup>     | 0.979                                                                                                          |
| Final R indexes [I >= 2 $\sigma$ (I)] | R <sub>1</sub> = 0.0347, wR <sub>2</sub> = 0.0697                                                              |
| Final R indexes [all data]            | R <sub>1</sub> = 0.0495, wR <sub>2</sub> = 0.0803                                                              |

Complex **A** was crystallized as a colourless crystal via vaporization of a hexane/ EtOAc solution, and its structure was determined by x-ray structure analysis. The crystallographic data that can be obtained free of charge from The Cambridge Crystallographic Data Centre via [www.ccdc.cam.ac.uk/data\\_request/cif](http://www.ccdc.cam.ac.uk/data_request/cif).

## 5 Characterization data for the products

\*Known compounds have been marked with references

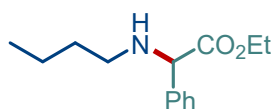

### ethyl 2-(butylamino)-2-phenylacetate (1)<sup>11</sup>

Light yellow oil; <sup>1</sup>H NMR (500 MHz, CDCl<sub>3</sub>) δ 7.39-7.27 (m, 5H), 4.34 (s, 1H), 4.23-4.16 (m, 1H), 4.15-4.09 (m, 1H), 2.61-2.56 (m, 1H), 2.52-2.47 (m, 1H), 1.97 (s, 1H), 1.53-1.47 (m, 2H), 1.38-1.29 (m, 2H), 1.21 (t, *J* = 7.5 Hz, 3H), 0.89 (t, *J* = 7.5 Hz, 3H); <sup>13</sup>C NMR (125 MHz, CDCl<sub>3</sub>) δ 173.2, 138.4, 128.6, 127.9, 127.3, 65.7, 61.0, 47.5, 32.1, 20.4, 14.1, 13.9; HRMS (ESI<sup>+</sup>) *m/z* calcd for C<sub>14</sub>H<sub>21</sub>NNaO<sub>2</sub> [M+Na]<sup>+</sup> 258.1464, found 258.1467.

.....

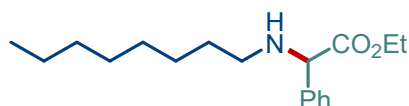

### ethyl 2-(octylamino)-2-phenylacetate (2)

Light yellow oil; <sup>1</sup>H NMR (600 MHz, CDCl<sub>3</sub>) δ 7.40-7.25 (m, 5H), 4.34 (s, 1H), 4.21-4.17 (m, 1H), 4.15-4.10 (m, 1H), 2.59-2.55 (m, 1H), 2.51-2.47 (m, 1H), 2.01 (s, 1H), 1.55-1.46 (m, 2H), 1.35-1.23 (m, 10H), 1.21 (t, *J* = 7.2 Hz, 3H), 0.87 (t, *J* = 7.2 Hz, 3H); <sup>13</sup>C NMR (150 MHz, CDCl<sub>3</sub>) δ 173.2, 138.4, 128.6, 127.9, 127.3, 65.7, 61.0, 47.8, 31.8, 30.0, 29.4, 29.2, 27.2, 22.6, 14.07, 14.02; HRMS (ESI<sup>+</sup>) *m/z* calcd for C<sub>18</sub>H<sub>29</sub>NNaO<sub>2</sub> [M+Na]<sup>+</sup> 314.2090, found 314.2098.

.....

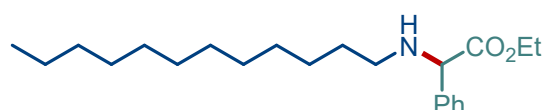

### ethyl 2-(dodecylamino)-2-phenylacetate (3)

Light yellow oil; <sup>1</sup>H NMR (600 MHz, CDCl<sub>3</sub>) δ 7.37 (d, *J* = 7.2 Hz, 2H), 7.33 (t, *J* = 7.2 Hz, 2H), 7.28 (t, *J* = 7.2 Hz, 1H), 4.34 (s, 1H), 4.22-4.17 (m, 1H), 4.15-4.09 (m, 1H), 2.59-2.55 (m, 1H), 2.51-2.47 (m, 1H), 1.99 (s, 1H), 1.55-1.46 (m, 2H), 1.33-1.25 (m, 18H), 1.20 (t, *J* = 7.2 Hz, 3H), 0.88 (t, *J* = 6.6 Hz, 3H); <sup>13</sup>C NMR (150 MHz, CDCl<sub>3</sub>) δ 173.1, 138.4, 128.6, 127.9, 127.3, 65.6, 61.0, 47.8, 31.9, 30.0, 29.62, 29.59, 29.57, 29.53, 29.47, 29.3, 27.2, 22.7, 14.1; HRMS (ESI<sup>+</sup>) *m/z* calcd for C<sub>22</sub>H<sub>38</sub>NO<sub>2</sub> [M+H]<sup>+</sup> 348.2897, found 348.2906.

.....

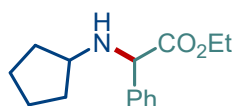

#### ethyl 2-(cyclopentylamino)-2-phenylacetate (4)

Colorless oil;  $^1\text{H NMR}$  (500 MHz,  $\text{CDCl}_3$ )  $\delta$  7.39-7.26 (m, 5H), 4.23-4.16 (m, 1H), 4.14-4.08 (m, 1H), 2.99-2.95 (m, 1H), 2.04 (br, 1H), 1.85-1.73 (m, 2H), 1.73-1.64 (m, 2H), 1.55-1.44 (m, 2H), 1.41-1.37 (m, 2H), 1.21 (t,  $J = 7.0$  Hz, 3H);  $^{13}\text{C NMR}$  (150 MHz,  $\text{CDCl}_3$ )  $\delta$  173.5, 138.7, 128.6, 127.9, 127.4, 64.3, 61.1, 57.4, 33.2, 33.0, 24.0, 23.96, 14.1; **HRMS** (ESI<sup>+</sup>)  $m/z$  calcd for  $\text{C}_{15}\text{H}_{22}\text{NO}_2$   $[\text{M}+\text{H}]^+$  248.1645, found 248.1655.

.....

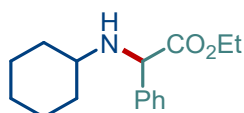

#### ethyl 2-(cyclohexylamino)-2-phenylacetate (5)<sup>12</sup>

Colorless oil;  $^1\text{H NMR}$  (500 MHz,  $\text{CDCl}_3$ )  $\delta$  7.37 (d,  $J = 7.0$  Hz, 2H), 7.33 (t,  $J = 7.5$  Hz, 2H), 7.28 (t,  $J = 7.0$  Hz, 1H), 4.51 (s, 1H), 4.22-4.15 (m, 1H), 4.14-4.08 (m, 1H), 2.41-2.30 (m, 1H), 2.09 (s, 1H), 1.87-1.81 (m, 2H), 1.74-1.66 (m, 2H), 1.59-1.56 (m, 1H), 1.23-1.10 (m, 8H);  $^{13}\text{C NMR}$  (125 MHz,  $\text{CDCl}_3$ )  $\delta$  173.6, 138.8, 128.6, 127.8, 127.3, 62.4, 61.0, 54.4, 33.4, 33.2, 26.0, 24.8, 14.1; **HRMS** (ESI<sup>+</sup>)  $m/z$  calcd for  $\text{C}_{16}\text{H}_{23}\text{NNaO}_2$   $[\text{M}+\text{Na}]^+$  284.1621, found 284.1626.

.....

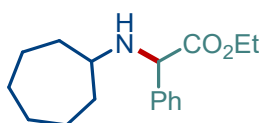

#### ethyl 2-(cycloheptylamino)-2-phenylacetate (6)

Colorless oil;  $^1\text{H NMR}$  (500 MHz,  $\text{CDCl}_3$ )  $\delta$  7.38-7.30 (m, 4H), 7.30-7.25 (m, 1H), 4.45 (s, 1H), 4.22-4.07 (m, 2H), 2.57-2.52 (m, 1H), 2.07 (s, 1H), 1.86-1.74 (m, 2H), 1.69-1.60 (m, 2H), 1.55-1.30 (m, 8H), 1.20 (t,  $J = 7.0$  Hz, 3H);  $^{13}\text{C NMR}$  (125 MHz,  $\text{CDCl}_3$ )  $\delta$  173.5, 138.6, 128.6, 127.8, 127.2, 62.8, 61.0, 56.4, 34.73, 34.67, 28.2, 28.1, 24.1, 14.0; **HRMS** (ESI<sup>+</sup>)  $m/z$  calcd for  $\text{C}_{17}\text{H}_{26}\text{NO}_2$   $[\text{M}+\text{H}]^+$  276.1958, found 276.1968.

.....

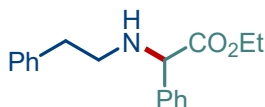

#### ethyl 2-(phenethylamino)-2-phenylacetate (7)

Colorless oil;  $^1\text{H NMR}$  (500 MHz,  $\text{CDCl}_3$ )  $\delta$  7.35-7.30 (m, 4H), 7.30-7.24 (m, 3H), 7.21-7.15 (m, 3H), 4.37 (s, 1H), 4.20-4.04 (m, 2H), 2.88-2.71 (m, 4H), 2.13 (br, 1H), 1.17 (t,  $J = 7.0$  Hz, 3H);  $^{13}\text{C NMR}$  (150 MHz,  $\text{CDCl}_3$ )  $\delta$  172.8, 139.7, 138.1, 128.63, 128.58, 128.4, 127.9, 127.3, 126.1, 65.5, 61.0, 49.0, 36.4, 14.0; **HRMS** (ESI<sup>+</sup>)  $m/z$  calcd for  $\text{C}_{18}\text{H}_{21}\text{NNaO}_2$   $[\text{M}+\text{Na}]^+$

306.1464, found 306.1481.

.....

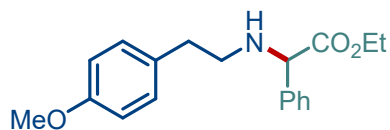

**ethyl 2-((3-(4-methoxyphenyl)propyl)amino)-2-phenylacetate (8)**

Colorless oil;  $^1\text{H NMR}$  (500 MHz,  $\text{CDCl}_3$ )  $\delta$  7.36-7.27 (m, 5H), 7.09 (d,  $J = 8.5$  Hz, 2H), 6.81 (d,  $J = 8.5$  Hz, 2H), 4.38 (s, 1H), 4.21-4.14 (m, 1H), 4.13-4.05 (m, 1H), 3.76 (s, 3H), 2.86-2.72 (m, 4H), 2.07 (br, 1H), 1.18 (t,  $J = 7.5$  Hz, 3H);  $^{13}\text{C NMR}$  (150 MHz,  $\text{CDCl}_3$ )  $\delta$  172.9, 158.0, 138.0, 131.5, 129.5, 128.6, 128.0, 127.3, 113.8, 65.5, 61.1, 55.1, 49.1, 35.3, 14.0; **HRMS** (ESI $^+$ )  $m/z$  calcd for  $\text{C}_{19}\text{H}_{23}\text{NNaO}_3$   $[\text{M}+\text{Na}]^+$  336.1570, found 336.1575.

.....

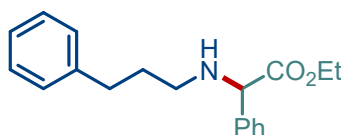

**ethyl 2-phenyl-2-((3-phenylpropyl)amino)acetate (9)**

Colorless oil;  $^1\text{H NMR}$  (500 MHz,  $\text{CDCl}_3$ )  $\delta$  7.38-7.24 (m, 7H), 7.19-7.14 (m, 3H), 4.33 (s, 1H), 4.25-4.06 (m, 2H), 2.71-2.58 (m, 3H), 2.56-2.51 (m, 1H), 1.94 (s, 1H), 1.87-1.80 (m, 2H), 1.20 (t,  $J = 7.0$  Hz, 3H);  $^{13}\text{C NMR}$  (125 MHz,  $\text{CDCl}_3$ )  $\delta$  173.2, 142.1, 138.4, 128.7, 128.4, 128.3, 128.0, 127.4, 125.8, 65.6, 61.1, 47.3, 33.5, 31.6, 14.1; **HRMS** (ESI $^+$ )  $m/z$  calcd for  $\text{C}_{19}\text{H}_{23}\text{NNaO}_2$   $[\text{M}+\text{Na}]^+$  320.1621, found 320.1627.

.....

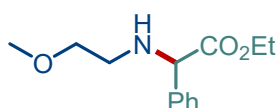

**ethyl 2-((2-methoxyethyl)amino)-2-phenylacetate (10)**

Colorless oil;  $^1\text{H NMR}$  (500 MHz,  $\text{CDCl}_3$ )  $\delta$  7.44-7.28 (m, 5H), 4.40 (s, 1H), 4.25-4.09 (m, 2H), 3.55-3.47 (m, 2H), 3.25 (s, 3H), 2.85-2.69 (m, 2H), 2.23 (s, 1H), 1.21 (t,  $J = 7.0$  Hz, 3H);  $^{13}\text{C NMR}$  (125 MHz,  $\text{CDCl}_3$ )  $\delta$  172.0, 136.8, 127.7, 127.2, 126.4, 70.7, 64.7, 60.4, 57.6, 46.4, 13.1; **HRMS** (ESI $^+$ )  $m/z$  calcd for  $\text{C}_{13}\text{H}_{19}\text{NNaO}_3$   $[\text{M}+\text{Na}]^+$  260.1257, found 260.1254.

.....

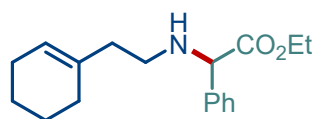

**ethyl 2-((2-(cyclohex-1-en-1-yl)ethyl)amino)-2-phenylacetate (11)**

Colorless oil;  $^1\text{H NMR}$  (500 MHz,  $\text{CDCl}_3$ )  $\delta$  7.38-7.31 (m, 4H), 7.30-7.27 (m, 1H), 5.51-5.42



(m, 1H), 4.36 (s, 1H), 4.22-4.08 (m, 2H), 2.67-2.53 (m, 2H), 2.16 (t,  $J = 7.0$  Hz, 2H), 2.09 (s, 1H), 2.01-1.95 (m, 2H), 1.93-1.78 (m, 2H), 1.63-1.57 (m, 2H), 1.56-1.52 (m, 2H), 1.20 (t,  $J = 7.0$  Hz, 3H);  $^{13}\text{C}$  NMR (150 MHz,  $\text{CDCl}_3$ )  $\delta$  173.0, 138.3, 135.1, 128.6, 127.9, 127.3, 122.8, 65.5, 61.0, 45.3, 38.2, 28.0, 25.2, 22.9, 22.4, 14.1; **HRMS** (ESI<sup>+</sup>)  $m/z$  calcd for  $\text{C}_{18}\text{H}_{25}\text{NNaO}_2$   $[\text{M}+\text{Na}]^+$  310.1777, found 310.1787.

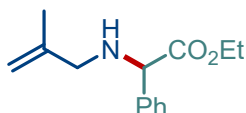

**ethyl 2-((2-methylallyl)amino)-2-phenylacetate (12)**

Light yellow oil;  $^1\text{H}$  NMR (600 MHz,  $\text{CDCl}_3$ )  $\delta$  7.38 (d,  $J = 7.2$  Hz, 2H), 7.34 (t,  $J = 7.2$  Hz, 2H), 7.29 (t,  $J = 7.2$  Hz, 1H), 4.89-4.85 (m, 2H), 4.35 (s, 1H), 4.22-4.09 (m, 2H), 3.12 (ABq,  $J = 13.8$  Hz, 2H), 2.11 (s, 1H), 1.75 (s, 3H), 1.20 (t,  $J = 7.2$  Hz, 3H);  $^{13}\text{C}$  NMR (125 MHz,  $\text{CDCl}_3$ )  $\delta$  173.0, 143.2, 138.3, 128.6, 127.9, 127.4, 111.5, 64.2, 61.0, 53.3, 20.7, 14.1; **HRMS** (ESI<sup>+</sup>)  $m/z$  calcd for  $\text{C}_{14}\text{H}_{19}\text{NNaO}_2$   $[\text{M}+\text{Na}]^+$  256.1308, found 256.1309.

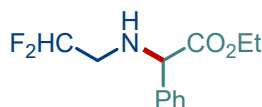

**ethyl 2-((2,2-difluoroethyl)amino)-2-phenylacetate (13)**

Colorless oil;  $^1\text{H}$  NMR (500 MHz,  $\text{CDCl}_3$ )  $\delta$  7.39-7.29 (m, 5H), 5.82 (tt,  $J = 56.5, 4.5$  Hz, 1H), 4.42 (s, 1H), 4.24-4.07 (m, 2H), 3.02-2.78 (m, 2H), 2.22 (s, 1H), 1.20 (t,  $J = 7.0$  Hz, 3H);  $^{13}\text{C}$  NMR (150 MHz,  $\text{CDCl}_3$ )  $\delta$  172.4, 137.5, 128.8, 128.4, 127.5, 116.0 (t,  $J = 238.5$  Hz), 65.1, 61.4, 49.2 (t,  $J = 24.0$  Hz), 14.1;  $^{19}\text{F}$  NMR (564 MHz,  $\text{CDCl}_3$ )  $\delta$  -(121.40)-(-121.62) (m); **HRMS** (ESI<sup>+</sup>)  $m/z$  calcd for  $\text{C}_{12}\text{H}_{16}\text{F}_2\text{NO}_2$   $[\text{M}+\text{H}]^+$  260.1281, found 260.1278.

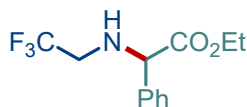

**ethyl 2-phenyl-2-((2,2,2-trifluoroethyl)amino)acetate (14)**

Colorless oil;  $^1\text{H}$  NMR (500 MHz,  $\text{CDCl}_3$ )  $\delta$  7.35-7.21 (m, 5H), 4.43 (s, 1H), 4.17-3.99 (m, 2H), 3.10-2.95 (m, 2H), 2.37 (s, 1H), 1.12 (t,  $J = 7.0$  Hz, 3H);  $^{13}\text{C}$  NMR (150 MHz,  $\text{CDCl}_3$ )  $\delta$  172.1, 137.0, 128.8, 128.4, 127.5, 125.4 (q,  $J = 276.0$  Hz), 64.4, 61.5, 47.8 (q,  $J = 31.5$  Hz), 14.0;  $^{19}\text{F}$  NMR (564 MHz,  $\text{CDCl}_3$ )  $\delta$  -71.72 (t,  $J = 9.6$  Hz); **HRMS** (ESI<sup>+</sup>)  $m/z$  calcd for  $\text{C}_{12}\text{H}_{14}\text{F}_3\text{NNaO}_2$   $[\text{M}+\text{Na}]^+$  284.0869, found 284.0873.

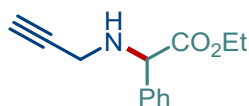

**ethyl 2-phenyl-2-(prop-2-yn-1-ylamino)acetate (15)**

Colorless oil;  $^1\text{H NMR}$  (600 MHz,  $\text{CDCl}_3$ )  $\delta$  7.40 (d,  $J = 8.4$  Hz, 2H), 7.35 (t,  $J = 7.8$  Hz, 2H), 7.33-7.29 (m, 1H), 4.61 (s, 1H), 4.23-4.11 (m, 2H), 3.48-3.45 (m, 1H), 3.32-3.25 (m, 1H), 2.25 (s, 1H), 2.05 (s, 1H), 1.21 (t,  $J = 7.2$  Hz, 3H);  $^{13}\text{C NMR}$  (150 MHz,  $\text{CDCl}_3$ )  $\delta$  172.4, 137.5, 128.7, 128.2, 127.8, 81.2, 72.0, 63.7, 61.3, 35.9, 14.1; **HRMS** ( $\text{ESI}^+$ )  $m/z$  calcd for  $\text{C}_{13}\text{H}_{15}\text{NNaO}_2$   $[\text{M}+\text{Na}]^+$  240.0995, found 240.1000.

.....

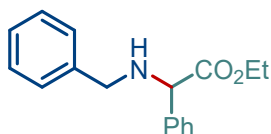

**ethyl 2-(benzylamino)-2-phenylacetate (16)<sup>12</sup>**

Colorless oil;  $^1\text{H NMR}$  (500 MHz,  $\text{CDCl}_3$ )  $\delta$  7.41-7.24 (m, 10H), 4.37 (s, 1H), 4.23-4.07 (m, 2H), 3.74 (s, 2H), 2.29 (br, 1H), 1.20 (t,  $J = 7.1$  Hz, 3H);  $^{13}\text{C NMR}$  (125 MHz,  $\text{CDCl}_3$ )  $\delta$  173.0, 139.5, 138.2, 128.7, 128.44, 128.36, 128.0, 127.6, 127.2, 64.5, 61.2, 51.4, 14.1; **HRMS** ( $\text{ESI}^+$ )  $m/z$  calcd for  $\text{C}_{17}\text{H}_{19}\text{NNaO}_2$   $[\text{M}+\text{Na}]^+$  292.1308, found 292.1313.

.....

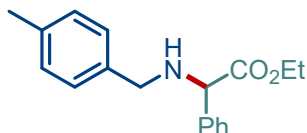

**ethyl 2-((4-methylbenzyl)amino)-2-phenylacetate (17)**

Light yellow oil;  $^1\text{H NMR}$  (500 MHz,  $\text{CDCl}_3$ )  $\delta$  7.38 (d,  $J = 7.5$  Hz, 2H), 7.34 (t,  $J = 7.5$  Hz, 2H), 7.29 (t,  $J = 7.0$  Hz, 1H), 7.21 (d,  $J = 7.5$  Hz, 2H), 7.12 (d,  $J = 7.5$  Hz, 2H), 4.37 (s, 1H), 4.22-4.15 (m, 1H), 4.14-4.07 (m, 1H), 3.70 (br, 1H), 2.36 (s, 1H), 2.33 (s, 3H), 1.19 (t,  $J = 7.0$  Hz, 3H);  $^{13}\text{C NMR}$  (150 MHz,  $\text{CDCl}_3$ )  $\delta$  172.9, 138.2, 136.7, 136.4, 129.1, 128.6, 128.3, 128.0, 127.5, 64.3, 61.1, 51.1, 21.1, 14.1; **HRMS** ( $\text{ESI}^+$ )  $m/z$  calcd for  $\text{C}_{18}\text{H}_{21}\text{NNaO}_2$   $[\text{M}+\text{Na}]^+$  306.1464, found 306.1471.

.....

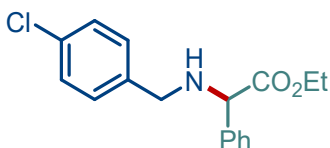

**ethyl 2-((4-chlorobenzyl)amino)-2-phenylacetate (18)**

Brown oil;  $^1\text{H NMR}$  (500 MHz,  $\text{CDCl}_3$ )  $\delta$  7.38-7.24 (m, 9H), 4.33 (s, 1H), 4.23-4.06 (m, 2H),

3.70 (s, 2H), 2.01 (s, 1H), 1.20 (t,  $J = 7.0$  Hz, 3H);  $^{13}\text{C}$  NMR (150 MHz,  $\text{CDCl}_3$ )  $\delta$  172.8, 138.0, 137.9, 132.7, 129.6, 128.6, 128.5, 128.0, 127.4, 64.3, 61.1, 50.5, 14.0; HRMS (ESI<sup>+</sup>)  $m/z$  calcd for  $\text{C}_{17}\text{H}_{18}\text{ClNNaO}_2$   $[\text{M}+\text{Na}]^+$  326.0918, found 326.0923.

.....

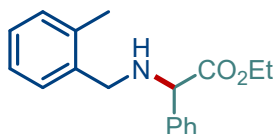

**ethyl 2-((2-methylbenzyl)amino)-2-phenylacetate (19)**

Light yellow oil;  $^1\text{H}$  NMR (500 MHz,  $\text{CDCl}_3$ )  $\delta$  7.40 (d,  $J = 7.5$  Hz, 2H), 7.34 (t,  $J = 7.0$  Hz, 2H), 7.31-7.26 (m, 2H), 7.18-7.11 (m, 3H), 4.40 (s, 1H), 4.22-4.08 (m, 2H), 3.72 (q,  $J = 13.0$  Hz, 2H), 2.31 (s, 3H), 2.19 (s, 1H), 1.20 (t,  $J = 7.5$  Hz, 3H);  $^{13}\text{C}$  NMR (125 MHz,  $\text{CDCl}_3$ )  $\delta$  172.0, 137.3, 136.5, 135.7, 129.3, 127.8, 127.6, 127.0, 126.5, 126.2, 124.9, 63.9, 60.1, 48.3, 17.9, 13.1; HRMS (ESI<sup>+</sup>)  $m/z$  calcd for  $\text{C}_{18}\text{H}_{21}\text{NNaO}_2$   $[\text{M}+\text{Na}]^+$  306.1464, found 306.1464.

.....

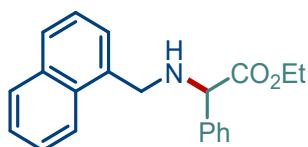

**ethyl 2-((naphthalen-1-ylmethyl)amino)-2-phenylacetate (20)**

Yellow oil;  $^1\text{H}$  NMR (500 MHz,  $\text{CDCl}_3$ )  $\delta$  8.13 (d,  $J = 8.0$  Hz, 1H), 7.84 (d,  $J = 7.5$  Hz, 1H), 7.77 (d,  $J = 8.0$  Hz, 1H), 7.53-7.39 (m, 6H), 7.35 (t,  $J = 7.5$  Hz, 2H), 7.30 (t,  $J = 7.2$  Hz, 1H), 4.48 (s, 1H), 4.23-4.12 (m, 4H), 2.35 (s, 1H), 1.20 (t,  $J = 7.0$  Hz, 3H);  $^{13}\text{C}$  NMR (150 MHz,  $\text{CDCl}_3$ )  $\delta$  173.0, 138.2, 135.1, 133.9, 131.9, 128.61, 128.58, 128.02, 127.96, 127.6, 126.4, 126.1, 125.6, 125.3, 123.9, 65.1, 61.1, 49.3, 14.1; HRMS (ESI<sup>+</sup>)  $m/z$  calcd for  $\text{C}_{21}\text{H}_{21}\text{NNaO}_2$   $[\text{M}+\text{Na}]^+$  342.1464, found 342.1427.

.....

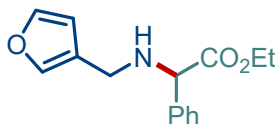

**ethyl 2-((furan-3-ylmethyl)amino)-2-phenylacetate (21)**

Yellow oil;  $^1\text{H}$  NMR (500 MHz,  $\text{CDCl}_3$ )  $\delta$  7.40-7.36 (m, 3H), 7.35 (d,  $J = 1.5$  Hz, 1H), 7.34-7.28 (m, 2H), 6.31 (dd,  $J = 3.0, 2.0$  Hz, 1H), 6.16 (d,  $J = 2.5$  Hz, 1H), 4.38 (s, 1H), 4.21-4.05 (m, 2H), 3.74 (q,  $J = 14.5$  Hz, 2H), 1.68 (s, 1H), 1.19 (t,  $J = 7.0$  Hz, 3H);  $^{13}\text{C}$  NMR (125 MHz,  $\text{CDCl}_3$ )  $\delta$  172.6, 153.0, 142.0, 137.8, 128.7, 128.1, 127.6, 110.1, 107.5, 64.2, 61.2, 43.8, 14.1; HRMS (ESI<sup>+</sup>)  $m/z$  calcd for  $\text{C}_{15}\text{H}_{18}\text{NO}_3$   $[\text{M}+\text{H}]^+$  260.1281, found 260.1278.

.....

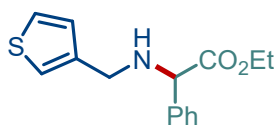

**ethyl 2-phenyl-2-((thiophen-3-ylmethyl)amino)acetate (22)**

Colorless oil;  $^1\text{H NMR}$  (500 MHz,  $\text{CDCl}_3$ )  $\delta$  7.40-7.27 (m, 6H), 7.13 (d,  $J = 1.5$  Hz, 1H), 7.06 (d,  $J = 5.0$  Hz, 1H), 4.38 (s, 1H), 4.23-4.08 (m, 2H), 3.76 (s, 2H), 2.14 (s, 1H), 1.20 (t,  $J = 7.0$  Hz, 3H);  $^{13}\text{C NMR}$  (150 MHz,  $\text{CDCl}_3$ )  $\delta$  172.9, 140.6, 138.1, 128.7, 128.0, 127.7, 127.5, 125.8, 122.0, 64.4, 61.2, 46.4, 14.1; **HRMS** ( $\text{ESI}^+$ )  $m/z$  calcd for  $\text{C}_{15}\text{H}_{17}\text{NNaO}_2\text{S}$   $[\text{M}+\text{Na}]^+$  298.0872, found 298.0864.

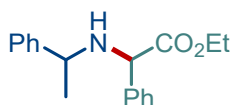

**ethyl 2-phenyl-2-(((R)-1-phenylethyl)amino)acetate (23)<sup>13</sup>**

Colorless oil;  $^1\text{H NMR}$  (600 MHz,  $\text{CDCl}_3$ )  $\delta$  7.36-7.30 (m, 5H), 7.29-7.24 (m, 5H), 4.18 (d,  $J = 2.5$  Hz, 1H), 4.13-3.98 (m, 2H), 3.58-3.54 (m, 1H), 2.36 (s, 1H), 1.34 (dd,  $J = 5.5, 2.5$  Hz, 3H), 1.14-1.11 (m, 3H);  $^{13}\text{C NMR}$  (150 MHz,  $\text{CDCl}_3$ )  $\delta$  172.8, 144.5, 138.4, 128.6, 128.5, 127.9, 127.7, 127.1, 126.9, 62.6, 61.1, 54.7, 24.3, 13.9; **HRMS** ( $\text{ESI}^+$ )  $m/z$  calcd for  $\text{C}_{18}\text{H}_{21}\text{NNaO}_2$   $[\text{M}+\text{Na}]^+$  306.1464, found 306.1459.

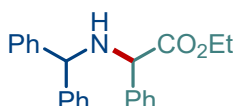

**ethyl 2-(benzhydrylamino)-2-phenylacetate (24)**

White solid; mp: 122-123 °C;  $^1\text{H NMR}$  (500 MHz,  $\text{CDCl}_3$ )  $\delta$  7.40 (d,  $J = 7.5$  Hz, 2H), 7.37-7.26 (m, 11H), 7.24-7.18 (m, 2H), 4.74 (s, 1H), 4.31 (s, 1H), 4.23-4.07 (m, 2H), 2.70 (s, 1H), 1.18 (t,  $J = 7.0$  Hz, 3H);  $^{13}\text{C NMR}$  (125 MHz,  $\text{CDCl}_3$ )  $\delta$  173.2, 143.3, 143.2, 138.3, 128.7, 128.6, 128.5, 128.0, 127.6, 127.48, 127.47, 127.3, 127.2, 64.5, 62.9, 61.2, 14.1; **HRMS** ( $\text{ESI}^+$ )  $m/z$  calcd for  $\text{C}_{23}\text{H}_{23}\text{NNaO}_2$   $[\text{M}+\text{Na}]^+$  368.1261, found 368.1271.

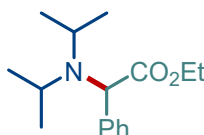

**ethyl 2-(diisopropylamino)-2-phenylacetate (25)**

Light yellow oil;  $^1\text{H NMR}$  (500 MHz,  $\text{CDCl}_3$ )  $\delta$  7.31-7.28 (m, 4H), 7.26-7.22 (m, 1H), 4.75 (s, 1H), 4.29-4.14 (m, 2H), 3.31-3.24 (m, 2H), 1.28 (t,  $J = 7.0$  Hz, 3H), 1.12 (d,  $J = 6.5$  Hz, 6H), 0.96 (d,  $J = 7.0$  Hz, 6H);  $^{13}\text{C NMR}$  (150 MHz,  $\text{CDCl}_3$ )  $\delta$  175.6, 139.5, 128.4, 128.0,

127.0, 61.6, 60.2, 45.7, 23.1, 21.6, 14.1; **HRMS** (ESI<sup>+</sup>) *m/z* calcd for C<sub>16</sub>H<sub>26</sub>NO<sub>2</sub> [M+H]<sup>+</sup> 264.1958, found 264.1960.

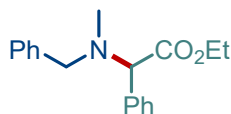

**ethyl 2-(benzyl(methyl)amino)-2-phenylacetate (26)**

Colorless oil; **<sup>1</sup>H NMR** (500 MHz, CDCl<sub>3</sub>) δ 7.48 (d, *J* = 7.5 Hz, 2H), 7.36-7.28 (m, 7H), 7.22 (t, *J* = 7.0 Hz, 1H), 4.31 (s, 1H), 4.26-4.13 (m, 2H), 3.65 (d, *J* = 13.5 Hz, 1H), 3.53 (d, *J* = 13.5 Hz, 1H), 2.21 (s, 3H), 1.24 (t, *J* = 7.0 Hz, 3H); **<sup>13</sup>C NMR** (125 MHz, CDCl<sub>3</sub>) δ 171.8, 138.9, 136.7, 128.8, 128.7, 128.4, 128.1, 128.0, 126.9, 72.2, 60.6, 58.5, 39.0, 14.2; **HRMS** (ESI<sup>+</sup>) *m/z* calcd for C<sub>18</sub>H<sub>21</sub>NNaO<sub>2</sub> [M+Na]<sup>+</sup> 306.1464, found 306.1474.

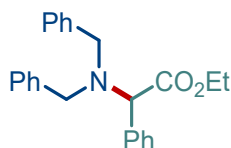

**ethyl 2-(dibenzylamino)-2-phenylacetate (27)<sup>12</sup>**

Colorless oil; **<sup>1</sup>H NMR** (500 MHz, CDCl<sub>3</sub>) δ 7.38-7.25 (m, 13H), 7.22-7.19 (m, 2H), 4.60 (s, 1H), 4.35-4.18 (m, 2H), 3.82-3.72 (m, 4H), 1.28 (t, *J* = 7.0 Hz, 3H); **<sup>13</sup>C NMR** (150 MHz, CDCl<sub>3</sub>) δ 172.1, 139.5, 136.8, 128.8, 128.3, 128.2, 127.7, 127.0, 65.8, 60.4, 54.2, 14.4; **HRMS** (ESI<sup>+</sup>) *m/z* calcd for C<sub>24</sub>H<sub>26</sub>NO<sub>2</sub> [M+H]<sup>+</sup> 360.1958, found 360.1955.

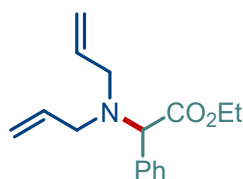

**ethyl 2-(diallylamino)-2-phenylacetate (28)**

Colorless oil; **<sup>1</sup>H NMR** (500 MHz, CDCl<sub>3</sub>) δ 7.39 (d, *J* = 7.5 Hz, 2H), 7.33 (t, *J* = 7.0 Hz, 2H), 7.28 (t, *J* = 7.0 Hz, 1H), 5.87-5.79 (m, 2H), 5.18-5.12 (m, 4H), 4.59 (s, 1H), 4.27-4.11 (m, 2H), 3.22 (d, *J* = 6.5 Hz, 4H), 1.25 (t, *J* = 7.0 Hz, 3H); **<sup>13</sup>C NMR** (125 MHz, CDCl<sub>3</sub>) δ 172.1, 136.8, 135.7, 128.7, 128.3, 127.9, 117.5, 67.7, 60.5, 53.2, 14.3; **HRMS** (ESI<sup>+</sup>) *m/z* calcd for C<sub>16</sub>H<sub>21</sub>NNaO<sub>2</sub> [M+Na]<sup>+</sup> 282.1464, found 282.1468.

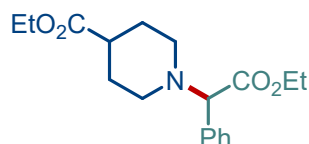

**ethyl 1-(2-ethoxy-2-oxo-1-phenylethyl)piperidine-4-carboxylate (29)**

Colorless oil;  $^1\text{H NMR}$  (500 MHz,  $\text{CDCl}_3$ )  $\delta$  7.43 (d,  $J = 7.0$  Hz, 2H), 7.36-7.28 (m, 3H), 4.22-4.15 (m, 1H), 4.14-4.09 (m, 3H), 4.01 (s, 1H), 2.90 (d,  $J = 11.0$  Hz, 1H), 2.76 (d,  $J = 11.0$  Hz, 1H), 2.32-2.25 (m, 1H), 2.21 (td,  $J = 11.0, 3.0$  Hz, 1H), 2.01 (td,  $J = 11.0, 3.0$  Hz, 1H), 1.92-1.76 (m, 4H), 1.23 (t,  $J = 7.5$  Hz, 3H), 1.20 (t,  $J = 7.5$  Hz, 3H);  $^{13}\text{C NMR}$  (150 MHz,  $\text{CDCl}_3$ )  $\delta$  175.0, 171.5, 136.1, 128.7, 128.4, 128.1, 74.1, 60.7, 60.2, 50.6, 50.5, 41.1, 28.1, 28.1, 14.2, 14.1; **HRMS** (ESI $^+$ )  $m/z$  calcd for  $\text{C}_{18}\text{H}_{25}\text{NNaO}_4$   $[\text{M}+\text{Na}]^+$  342.1676, found 342.1671.

.....

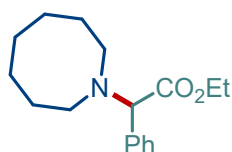

**ethyl 2-(azocan-1-yl)-2-phenylacetate (30)**

Colorless oil;  $^1\text{H NMR}$  (500 MHz,  $\text{CDCl}_3$ )  $\delta$  7.41 (d,  $J = 7.5$  Hz, 2H), 7.32 (t,  $J = 7.0$  Hz, 2H), 7.28 (t,  $J = 7.0$  Hz, 1H), 4.40 (s, 1H), 4.22-4.12 (m, 2H), 2.70-2.57 (m, 4H), 1.74-1.65 (m, 2H), 1.61-1.50 (m, 4H), 1.49-1.40 (m, 4H), 1.24 (t,  $J = 7.0$  Hz, 3H);  $^{13}\text{C NMR}$  (150 MHz,  $\text{CDCl}_3$ )  $\delta$  172.7, 138.0, 129.0, 128.1, 127.6, 73.3, 60.3, 51.5, 27.9, 27.5, 25.7, 14.2; **HRMS** (ESI $^+$ )  $m/z$  calcd for  $\text{C}_{17}\text{H}_{26}\text{NO}_2$   $[\text{M}+\text{H}]^+$  276.1958, found 276.1960.

.....

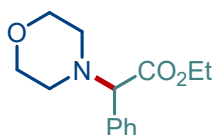

**ethyl 2-morpholino-2-phenylacetate (31)<sup>14</sup>**

Light yellow oil;  $^1\text{H NMR}$  (500 MHz,  $\text{CDCl}_3$ )  $\delta$  7.45 (d,  $J = 7.0$  Hz, 2H), 7.38-7.29 (m, 3H), 4.23-4.06 (m, 2H), 3.96 (s, 1H), 3.73 (t,  $J = 4.5$  Hz, 4H), 2.46-2.43 (m, 4H), 1.20 (t,  $J = 7.5$  Hz, 3H);  $^{13}\text{C NMR}$  (150 MHz,  $\text{CDCl}_3$ )  $\delta$  171.1, 135.4, 128.8, 128.5, 128.4, 74.4, 66.8, 60.9, 51.5, 14.0; **HRMS** (ESI $^+$ )  $m/z$  calcd for  $\text{C}_{14}\text{H}_{20}\text{NO}_3$   $[\text{M}+\text{H}]^+$  250.1438, found 250.1446.

.....

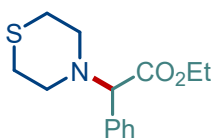

**ethyl 2-phenyl-2-thiomorpholinoacetate (32)**

Light yellow oil;  $^1\text{H NMR}$  (500 MHz,  $\text{CDCl}_3$ )  $\delta$  7.39 (d,  $J = 7.0$  Hz, 2H), 7.37-7.29 (m, 3H), 4.24-4.10 (m, 3H), 2.84-2.78 (m, 2H), 2.77-2.71 (m, 2H), 2.70-2.66 (m, 4H), 1.22 (t,  $J = 7.0$  Hz, 3H);  $^{13}\text{C NMR}$  (125 MHz,  $\text{CDCl}_3$ )  $\delta$  171.4, 135.6, 128.7, 128.5, 128.2, 73.9, 60.8, 52.7,

27.9, 14.1; **HRMS** (ESI<sup>+</sup>) *m/z* calcd for C<sub>14</sub>H<sub>19</sub>NNaO<sub>2</sub>S [M+Na]<sup>+</sup> 288.1029, found 288.1036.

.....

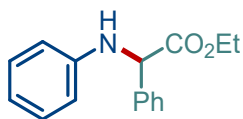

**ethyl 2-phenyl-2-(phenylamino)acetate (33)**<sup>12</sup>

White solid; mp: 86-87 °C; **<sup>1</sup>H NMR** (600 MHz, CDCl<sub>3</sub>) δ 7.49 (d, *J* = 7.2 Hz, 2H), 7.34 (t, *J* = 7.2 Hz, 2H), 7.28 (t, *J* = 7.2 Hz, 1H), 7.13-7.09 (m, 2H), 6.68 (t, *J* = 7.2 Hz, 1H), 6.55 (d, *J* = 7.2 Hz, 2H), 5.06 (s, 1H), 4.95 (s, 1H), 4.25-4.19 (m, 1H), 4.15-4.10 (m, 1H), 1.20 (t, *J* = 7.2 Hz, 3H); **<sup>13</sup>C NMR** (150 MHz, CDCl<sub>3</sub>) δ 171.9, 146.1, 137.8, 129.3, 128.8, 128.2, 127.2, 118.1, 113.5, 61.8, 60.9, 14.1; **HRMS** (ESI<sup>+</sup>) *m/z* calcd for C<sub>16</sub>H<sub>18</sub>NO<sub>2</sub> [M+H]<sup>+</sup> 256.1332, found 256.1334.

.....

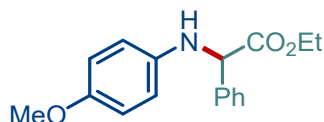

**ethyl 2-((4-methoxyphenyl)amino)-2-phenylacetate (34)**<sup>12</sup>

Yellow oil; **<sup>1</sup>H NMR** (500 MHz, CDCl<sub>3</sub>) δ 7.48 (d, *J* = 7.0 Hz, 2H), 7.34 (t, *J* = 7.0 Hz, 2H), 7.29 (t, *J* = 7.0 Hz, 1H), 6.71 (d, *J* = 9.0 Hz, 2H), 6.53 (d, *J* = 9.0 Hz, 2H), 5.00 (s, 1H), 4.67 (s, 1H), 4.24-4.19 (m, 1H), 4.15-4.10 (m, 1H), 3.69 (s, 3H), 1.20 (t, *J* = 7.2 Hz, 3H); **<sup>13</sup>C NMR** (150 MHz, CDCl<sub>3</sub>) δ 172.0, 152.5, 140.2, 137.9, 128.7, 128.1, 127.2, 114.8, 114.7, 61.7, 61.6, 55.7, 14.0; **HRMS** (ESI<sup>+</sup>) *m/z* calcd for C<sub>17</sub>H<sub>20</sub>NO<sub>3</sub> [M+H]<sup>+</sup> 286.1438, found 286.1442.

.....

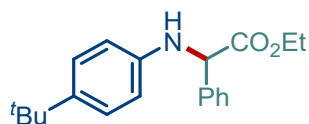

**ethyl 2-((4-(tert-butyl)phenyl)amino)-2-phenylacetate (35)**<sup>15</sup>

White solid; mp: 94-95 °C; **<sup>1</sup>H NMR** (600 MHz, CDCl<sub>3</sub>) δ 7.49 (d, *J* = 7.8 Hz, 2H), 7.34 (t, *J* = 7.8 Hz, 2H), 7.28 (t, *J* = 7.2 Hz, 1H), 7.15 (d, *J* = 8.4, 2H), 6.52 (d, *J* = 8.4 Hz, 2H), 5.02 (s, 1H), 4.85 (s, 1H), 4.25-4.20 (m, 1H), 4.16-4.10 (m, 1H), 1.23 (s, 9H), 1.20 (t, *J* = 6.6 Hz, 3H); **<sup>13</sup>C NMR** (150 MHz, CDCl<sub>3</sub>) δ 172.0, 143.7, 140.8, 138.0, 128.8, 128.1, 127.2, 126.0, 113.0, 61.7, 61.1, 33.8, 31.5, 14.0; **HRMS** (ESI<sup>+</sup>) *m/z* calcd for C<sub>20</sub>H<sub>25</sub>NNaO<sub>2</sub> [M+Na]<sup>+</sup> 334.1778, found 334.1780.

.....

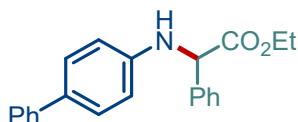

**ethyl 2-([1,1'-biphenyl]-4-ylamino)-2-phenylacetate (36)<sup>15</sup>**

White solid; mp: 95-97 °C; <sup>1</sup>H NMR (500 MHz, CDCl<sub>3</sub>) δ 7.53-7.45 (m, 4H), 7.41-7.28 (m, 7H), 7.23 (t, *J* = 7.0 Hz, 1H), 6.63 (d, *J* = 10.5 Hz, 2H), 5.10 (s, 1H), 5.06 (br, 1H), 4.28-4.22 (m, 1H), 4.18-4.12 (m, 1H), 1.22 (t, *J* = 7.1 Hz, 3H); <sup>13</sup>C NMR (125 MHz, CDCl<sub>3</sub>) δ 171.7, 145.4, 141.1, 137.6, 130.9, 128.9, 128.6, 128.3, 127.9, 127.2, 126.3, 126.1, 113.6, 61.9, 60.8, 14.0; HRMS (ESI<sup>+</sup>) *m/z* calcd for C<sub>22</sub>H<sub>21</sub>NNaO<sub>2</sub> [M+Na]<sup>+</sup> 354.1465, found 354.1466.

.....

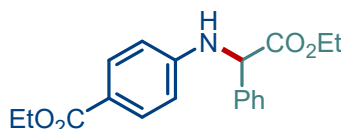

**ethyl 4-((2-ethoxy-2-oxo-1-phenylethyl)amino)benzoate (37)**

White solid; mp: 120-121 °C; <sup>1</sup>H NMR (600 MHz, CDCl<sub>3</sub>) δ 7.81 (d, *J* = 9.0 Hz, 2H), 7.46 (d, *J* = 7.2 Hz, 2H), 7.34 (t, *J* = 7.2 Hz, 2H), 7.29 (t, *J* = 7.2 Hz, 1H), 6.51 (d, *J* = 9.0 Hz, 2H), 5.47 (s, 1H), 5.11 (s, 1H), 4.30-4.20 (m, 3H), 4.16-4.10 (m, 1H), 1.31 (t, *J* = 7.2 Hz, 3H), 1.20 (t, *J* = 7.2 Hz, 3H); <sup>13</sup>C NMR (150 MHz, CDCl<sub>3</sub>) δ 171.1, 166.6, 149.4, 136.8, 131.3, 128.9, 128.4, 127.0, 119.6, 112.3, 62.0, 60.1, 60.0, 14.3, 13.9; HRMS (ESI<sup>+</sup>) *m/z* calcd for C<sub>19</sub>H<sub>21</sub>NNaO<sub>4</sub> [M+Na]<sup>+</sup> 350.1363, found 350.1365.

.....

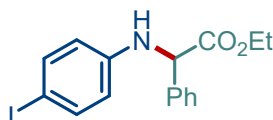

**ethyl 2-((4-iodophenyl)amino)-2-phenylacetate (38)<sup>12</sup>**

White solid; mp: 122-123 °C; <sup>1</sup>H NMR (600 MHz, CDCl<sub>3</sub>) δ 7.45 (d, *J* = 7.2 Hz, 2H), 7.37-7.33 (m, 4H), 7.30 (t, *J* = 7.2 Hz, 1H), 6.33 (d, *J* = 8.4 Hz, 2H), 5.04 (s, 1H), 5.00 (s, 1H), 4.26-4.21 (m, 1H), 4.16-4.10 (m, 1H), 1.21 (t, *J* = 7.2 Hz, 3H); <sup>13</sup>C NMR (150 MHz, CDCl<sub>3</sub>) δ 171.4, 145.4, 137.8, 137.1, 128.9, 128.4, 127.1, 115.6, 78.9, 62.0, 60.5, 14.0; HRMS (ESI<sup>+</sup>) *m/z* calcd for C<sub>16</sub>H<sub>17</sub>INO<sub>2</sub> [M+H]<sup>+</sup> 382.0299, found 382.0295.

.....

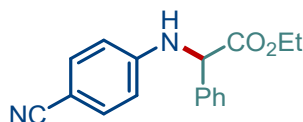

**ethyl 2-((4-cyanophenyl)amino)-2-phenylacetate (39)<sup>16</sup>**

Yellow solid; mp: 100-102 °C; <sup>1</sup>H NMR (600 MHz, CDCl<sub>3</sub>) δ 7.45 (d, *J* = 7.2 Hz, 2H), 7.38-7.29 (m, 5H), 6.51 (d, *J* = 9.0 Hz, 2H), 5.59 (d, *J* = 5.4 Hz, 1H), 5.07 (d, *J* = 6.0 Hz, 1H), 4.27-4.22 (m, 1H), 4.17-4.12 (m, 1H), 1.21 (t, *J* = 7.2 Hz, 3H); <sup>13</sup>C NMR (150 MHz, CDCl<sub>3</sub>)



$\delta$  170.8, 148.9, 136.3, 133.6, 129.0, 128.6, 126.9, 120.0, 113.0, 99.8, 62.2, 59.8, 13.9; **HRMS** (ESI<sup>+</sup>)  $m/z$  calcd for C<sub>17</sub>H<sub>17</sub>N<sub>2</sub>O<sub>2</sub> [M+H]<sup>+</sup> 281.1285, found 382.0292.

.....

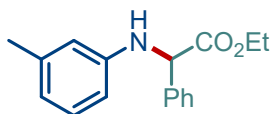

**ethyl 2-phenyl-2-(*m*-tolylamino)acetate (40)**<sup>12</sup>

White solid; mp: 108-109 °C; **<sup>1</sup>H NMR** (600 MHz, CDCl<sub>3</sub>)  $\delta$  7.49 (d,  $J$  = 7.8 Hz, 2H), 7.33 (t,  $J$  = 7.2 Hz, 2H), 7.28 (t,  $J$  = 7.2 Hz, 1H), 6.99 (t,  $J$  = 7.8 Hz, 1H), 6.51 (d,  $J$  = 7.2 Hz, 1H), 6.41 (s, 1H), 6.35 (d,  $J$  = 8.4 Hz, 1H), 5.05 (s, 1H), 4.88 (s, 1H), 4.25-4.20 (m, 1H), 4.15-4.10 (m, 1H), 2.21 (s, 3H), 1.20 (t,  $J$  = 6.6 Hz, 3H); **<sup>13</sup>C NMR** (150 MHz, CDCl<sub>3</sub>)  $\delta$  171.8, 146.0, 138.9, 137.8, 129.1, 128.7, 128.1, 127.1, 119.0, 114.3, 110.4, 61.7, 60.8, 21.5, 14.0; **HRMS** (ESI<sup>+</sup>)  $m/z$  calcd for C<sub>17</sub>H<sub>20</sub>NO<sub>2</sub> [M+H]<sup>+</sup> 270.1489, found 270.1492.

.....

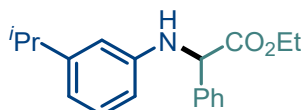

**ethyl 2-((3-isopropylphenyl)amino)-2-phenylacetate (41)**

White solid; mp: 115-116 °C; **<sup>1</sup>H NMR** (600 MHz, CDCl<sub>3</sub>)  $\delta$  7.50 (d,  $J$  = 7.8 Hz, 2H), 7.34 (t,  $J$  = 7.2 Hz, 2H), 7.29 (t,  $J$  = 7.8 Hz, 1H), 7.04 (t,  $J$  = 7.8 Hz, 1H), 6.58 (d,  $J$  = 7.2 Hz, 1H), 6.47 (t,  $J$  = 2.4 Hz, 1H), 6.36 (dd,  $J$  = 7.8, 2.4 Hz, 1H), 5.05 (s, 1H), 4.91 (s, 1H), 4.26-4.21 (m, 1H), 4.16-4.10 (m, 1H), 2.78-2.74 (m, 1H), 1.21 (t,  $J$  = 7.2 Hz, 3H), 1.19-1.15 (m, 6H); **<sup>13</sup>C NMR** (150 MHz, CDCl<sub>3</sub>)  $\delta$  171.9, 150.0, 146.1, 137.9, 129.1, 128.8, 128.1, 127.2, 116.4, 112.0, 110.7, 61.7, 61.0, 34.1, 23.9, 23.8, 14.0; **HRMS** (ESI<sup>+</sup>)  $m/z$  calcd for C<sub>19</sub>H<sub>23</sub>NNaO<sub>2</sub> [M+Na]<sup>+</sup> 320.1621, found 320.1631.

.....

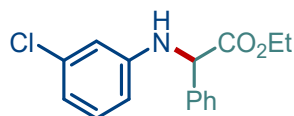

**ethyl 2-((3-chlorophenyl)amino)-2-phenylacetate (42)**<sup>12</sup>

Light yellow solid; mp: 86-87 °C; **<sup>1</sup>H NMR** (500 MHz, CDCl<sub>3</sub>)  $\delta$  7.47 (d,  $J$  = 7.5 Hz, 2H), 7.35 (t,  $J$  = 7.0 Hz, 2H), 7.30 (t,  $J$  = 7.0 Hz, 1H), 7.00 (t,  $J$  = 8.0 Hz, 1H), 6.64 (d,  $J$  = 8.0 Hz, 1H), 6.53 (s, 1H), 6.40 (dd,  $J$  = 8.0, 2.0 Hz, 1H), 5.09 (s, 1H), 5.02 (s, 1H), 4.27-4.19 (m, 1H), 4.16-4.08 (m, 1H), 1.20 (t,  $J$  = 7.0 Hz, 3H); **<sup>13</sup>C NMR** (150 MHz, CDCl<sub>3</sub>)  $\delta$  171.4, 147.1, 137.2, 134.9, 130.2, 128.9, 128.4, 127.1, 117.9, 113.2, 111.6, 62.0, 60.5, 14.0; **HRMS** (ESI<sup>+</sup>)  $m/z$  calcd for C<sub>16</sub>H<sub>17</sub>ClNO<sub>2</sub> [M+H]<sup>+</sup> 290.0948, found 290.0948.

.....

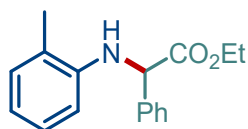

**ethyl 2-phenyl-2-(*o*-tolylamino)acetate (43)**<sup>12</sup>

Colorless oil; <sup>1</sup>H NMR (500 MHz, CDCl<sub>3</sub>) δ 7.50 (d, *J* = 7.5 Hz, 2H), 7.34 (t, *J* = 7.0 Hz, 2H), 7.29 (t, *J* = 7.5 Hz, 1H), 7.06 (d, *J* = 7.5 Hz, 1H), 6.96 (t, *J* = 7.5 Hz, 1H), 6.64 (t, *J* = 7.5 Hz, 1H), 6.33 (d, *J* = 8.0 Hz, 1H), 5.09 (s, 1H), 4.90 (s, 1H), 4.28-4.19 (m, 1H), 4.18-4.10 (m, 1H), 2.28 (s, 3H), 1.21 (t, *J* = 7.5 Hz, 3H). <sup>13</sup>C NMR (150 MHz, CDCl<sub>3</sub>) δ 172.0, 144.0, 137.8, 130.2, 128.8, 128.1, 127.1, 127.0, 122.4, 117.6, 110.7, 61.8, 60.7, 17.5, 14.0. **HRMS** (ESI<sup>+</sup>) *m/z* calcd for C<sub>17</sub>H<sub>20</sub>NO<sub>2</sub> [M+H]<sup>+</sup> 270.1489, found 270.1488.

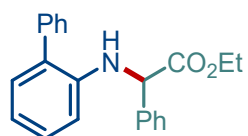

**ethyl 2-([1,1'-biphenyl]-2-ylamino)-2-phenylacetate (44)**

White solid; mp: 121-122 °C; <sup>1</sup>H NMR (500 MHz, CDCl<sub>3</sub>) δ 7.55-7.47 (m, 4H), 7.44 (d, *J* = 7.0 Hz, 2H), 7.38 (t, *J* = 7.0 Hz, 1H), 7.33 (t, *J* = 7.0 Hz, 2H), 7.28 (t, *J* = 7.0 Hz, 1H), 7.13 (dd, *J* = 7.5, 1.5 Hz, 1H), 7.09 (t, *J* = 7.5 Hz, 1H), 6.76 (dd, *J* = 7.5, 6.5 Hz, 1H), 6.43 (d, *J* = 8.0 Hz, 1H), 5.33 (s, 1H), 5.07 (s, 1H), 4.18-4.11 (m, 1H), 4.11-4.04 (m, 1H), 1.15 (t, *J* = 7.5 Hz, 3H); <sup>13</sup>C NMR (150 MHz, CDCl<sub>3</sub>) δ 171.5, 142.8, 139.2, 137.6, 130.3, 129.2, 129.0, 128.8, 128.5, 128.2, 128.1, 127.4, 127.1, 117.7, 111.3, 61.7, 60.9, 13.9; **HRMS** (ESI<sup>+</sup>) *m/z* calcd for C<sub>22</sub>H<sub>22</sub>NO<sub>2</sub> [M+H]<sup>+</sup> 332.1645, found 332.1648.

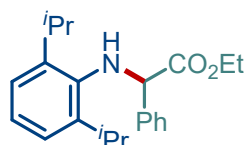

**ethyl 2-((2,6-diisopropylphenyl)amino)-2-phenylacetate (45)**<sup>16</sup>

Yellow oil; <sup>1</sup>H NMR (600 MHz, CDCl<sub>3</sub>) δ 7.39 (d, *J* = 7.2 Hz, 2H), 7.33 (t, *J* = 7.2 Hz, 2H), 7.29 (t, *J* = 7.2 Hz, 1H), 7.06-6.99 (m, 3H), 4.64 (s, 1H), 4.33 (s, 1H), 4.21-4.09 (m, 2H), 3.20-3.11 (m, 2H), 1.19-1.16 (m, 9H), 1.09 (d, *J* = 7.2 Hz, 6H); <sup>13</sup>C NMR (150 MHz, CDCl<sub>3</sub>) δ 173.3, 141.9, 141.5, 138.7, 128.6, 128.0, 126.9, 123.6, 123.5, 66.9, 61.4, 27.7, 24.3, 24.0, 14.0; **HRMS** (ESI<sup>+</sup>) *m/z* calcd for C<sub>22</sub>H<sub>30</sub>NO<sub>2</sub> [M+H]<sup>+</sup> 340.2271, found 340.2276.

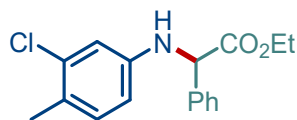

**ethyl 2-((3-chloro-4-methylphenyl)amino)-2-phenylacetate (46)**

White solid; mp: 109-110 °C;  $^1\text{H NMR}$  (600 MHz,  $\text{CDCl}_3$ )  $\delta$  7.47 (d,  $J = 7.8$  Hz, 2H), 7.35 (t,  $J = 7.2$  Hz, 2H), 7.30 (t,  $J = 7.2$  Hz, 1H), 6.93 (d,  $J = 8.4$  Hz, 1H), 6.57 (d,  $J = 2.4$  Hz, 1H), 6.37 (dd,  $J = 8.4, 2.4$  Hz, 1H), 5.00 (s, 1H), 4.90 (s, 1H), 4.26-4.21 (m, 1H), 4.16-4.10 (m, 1H), 2.20 (s, 3H), 1.21 (t,  $J = 7.2$  Hz, 3H);  $^{13}\text{C NMR}$  (150 MHz,  $\text{CDCl}_3$ )  $\delta$  171.6, 145.0, 137.3, 134.7, 131.3, 128.9, 128.3, 127.1, 124.9, 113.8, 112.0, 61.9, 60.7, 18.9, 14.0; **HRMS** (ESI<sup>+</sup>)  $m/z$  calcd for  $\text{C}_{17}\text{H}_{19}\text{ClNO}_2$   $[\text{M}+\text{H}]^+$  304.1099, found 304.1101.

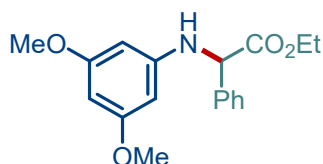

**ethyl 2-((3,5-dimethoxyphenyl)amino)-2-phenylacetate (47)**

Brown oil;  $^1\text{H NMR}$  (600 MHz,  $\text{CDCl}_3$ )  $\delta$  7.47 (d,  $J = 7.2$  Hz, 2H), 7.34 (t,  $J = 7.2$  Hz, 2H), 7.29 (t,  $J = 7.2$  Hz, 1H), 5.86 (s, 1H), 5.75 (s, 2H), 5.03 (s, 1H), 4.98 (s, 1H), 4.29-4.06 (m, 2H), 3.69 (s, 6H), 1.21 (t,  $J = 7.2$  Hz, 3H);  $^{13}\text{C NMR}$  (150 MHz,  $\text{CDCl}_3$ )  $\delta$  171.7, 161.6, 147.9, 137.7, 128.8, 128.2, 127.1, 92.3, 90.5, 61.8, 60.8, 55.1, 14.0; **HRMS** (ESI<sup>+</sup>)  $m/z$  calcd for  $\text{C}_{18}\text{H}_{22}\text{NO}_4$   $[\text{M}+\text{H}]^+$  316.1543, found 316.1545.

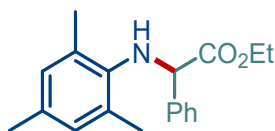

**methyl 2-(mesitylamino)-2-phenylacetate (48)<sup>12</sup>**

Colorless oil;  $^1\text{H NMR}$  (600 MHz,  $\text{CDCl}_3$ )  $\delta$  7.42 (d,  $J = 7.2$  Hz, 2H), 7.32 (t,  $J = 7.2$  Hz, 2H), 7.28 (t,  $J = 7.2$  Hz, 1H), 6.76 (s, 2H), 4.85 (s, 1H), 4.28 (s, 1H), 4.22-4.05 (m, 2H), 2.20 (s, 6H), 2.19 (s, 3H), 1.17 (t,  $J = 7.2$  Hz, 3H);  $^{13}\text{C NMR}$  (150 MHz,  $\text{CDCl}_3$ )  $\delta$  173.4, 141.8, 138.8, 131.0, 129.5, 128.9, 128.6, 127.9, 127.0, 64.2, 61.4, 20.5, 18.8, 14.0; **HRMS** (ESI<sup>+</sup>)  $m/z$  calcd for  $\text{C}_{19}\text{H}_{24}\text{INO}_2$   $[\text{M}+\text{H}]^+$  298.1802, found 298.1803.

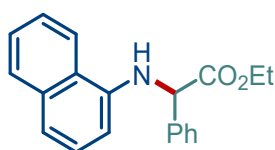

**ethyl 2-(naphthalen-1-ylamino)-2-phenylacetate (49)<sup>12</sup>**

Brown oil;  $^1\text{H NMR}$  (600 MHz,  $\text{CDCl}_3$ )  $\delta$  8.02 (d,  $J = 8.4$  Hz, 1H), 7.78 (d,  $J = 7.8$  Hz, 1H), 7.57 (d,  $J = 7.2$  Hz, 2H), 7.52-7.43 (m, 2H), 7.35 (t,  $J = 7.2$  Hz, 2H), 7.31 (t,  $J = 7.2$  Hz, 1H), 7.23-7.15 (m, 2H), 6.34 (d,  $J = 7.2$  Hz, 1H), 5.80 (br, 1H), 5.23 (s, 1H), 4.31-4.25 (m, 1H), 4.21-4.16 (m, 1H), 1.24 (t,  $J = 6.6$  Hz, 3H);  $^{13}\text{C NMR}$  (150 MHz,  $\text{CDCl}_3$ )  $\delta$  171.9, 141.0, 137.5, 134.3, 128.8, 128.6, 128.3, 127.2, 126.3, 125.8, 124.9, 123.4, 120.1, 118.0, 105.6, 62.0, 60.9, 14.0; **HRMS** (ESI<sup>+</sup>)  $m/z$  calcd for  $\text{C}_{20}\text{H}_{19}\text{NNaO}_2$   $[\text{M}+\text{Na}]^+$  328.1308, found 328.1309.

.....

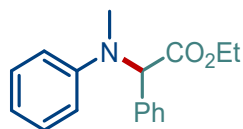

**ethyl 2-(methyl(phenyl)amino)-2-phenylacetate (50)**<sup>12</sup>

White solid; mp: 72-73 °C;  $^1\text{H NMR}$  (500 MHz,  $\text{CDCl}_3$ )  $\delta$  7.40-7.31 (m, 3H), 7.30-7.25 (m, 4H), 6.88 (d,  $J = 8.0$  Hz, 2H), 6.80 (t,  $J = 7.0$  Hz, 1H), 5.64 (s, 1H), 4.32-4.20 (m, 2H), 2.80 (s, 3H), 1.27 (t,  $J = 7.0$  Hz, 3H);  $^{13}\text{C NMR}$  (150 MHz,  $\text{CDCl}_3$ )  $\delta$  171.8, 150.0, 136.0, 129.2, 128.6, 128.4, 128.0, 118.0, 113.5, 65.8, 61.0, 34.6, 14.3. **HRMS** (ESI<sup>+</sup>)  $m/z$  calcd for  $\text{C}_{17}\text{H}_{20}\text{NO}_2$   $[\text{M}+\text{H}]^+$  270.1489, found 270.1490.

.....

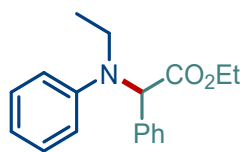

**ethyl 2-(ethyl(phenyl)amino)-2-phenylacetate (51)**

White solid; mp: 75-76 °C;  $^1\text{H NMR}$  (500 MHz,  $\text{CDCl}_3$ )  $\delta$  7.40-7.31 (m, 5H), 7.25 (t,  $J = 7.5$  Hz, 2H), 6.85 (d,  $J = 8.0$  Hz, 2H), 6.79 (t,  $J = 7.5$  Hz, 1H), 5.52 (s, 1H), 4.30-4.14 (m, 2H), 3.32 (q,  $J = 7.0$  Hz, 2H), 1.24 (t,  $J = 7.5$  Hz, 3H), 0.91 (t,  $J = 7.0$  Hz, 3H);  $^{13}\text{C NMR}$  (150 MHz,  $\text{CDCl}_3$ )  $\delta$  172.1, 148.6, 136.1, 129.2, 128.9, 128.6, 128.1, 118.1, 114.5, 66.2, 61.1, 42.5, 14.2, 13.5; **HRMS** (ESI<sup>+</sup>)  $m/z$  calcd for  $\text{C}_{18}\text{H}_{22}\text{NO}_2$   $[\text{M}+\text{H}]^+$  284.1645, found 284.1648.

.....

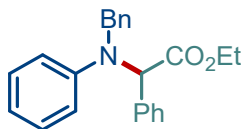

**methyl 2-(benzyl(phenyl)amino)-2-phenylacetate (52)**

White solid; mp: 103-104 °C;  $^1\text{H NMR}$  (500 MHz,  $\text{CDCl}_3$ )  $\delta$  7.33 (d,  $J = 7.0$  Hz, 2H), 7.30-7.23 (m, 3H), 7.21-7.09 (m, 7H), 6.84-6.76 (m, 3H), 5.72 (s, 1H), 4.55 (ABq,  $J = 17.5$  Hz, 2H), 4.19 (q,  $J = 7.0$  Hz, 2H), 1.21 (t,  $J = 7.0$  Hz, 3H);  $^{13}\text{C NMR}$  (150 MHz,  $\text{CDCl}_3$ )  $\delta$  171.9, 149.2, 139.5, 135.5, 129.1, 128.9, 128.5, 128.2, 128.0, 126.5, 126.3, 118.7, 114.9, 66.4, 61.2,

52.4, 14.1; **HRMS** (ESI<sup>+</sup>) *m/z* calcd for C<sub>23</sub>H<sub>24</sub>NO<sub>2</sub> [M+H]<sup>+</sup> 346.1802, found 346.1804.

.....

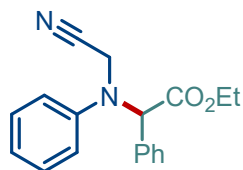

**ethyl 2-((cyanomethyl)(phenyl)amino)-2-phenylacetate (53)**

White solid; mp: 137-138 °C; <sup>1</sup>H NMR (600 MHz, CDCl<sub>3</sub>) δ 7.47-7.30 (m, 7H), 7.03-6.99 (m, 3H), 5.53 (s, 1H), 4.29-4.18 (m, 2H), 4.06 (s, 2H), 1.23 (t, *J* = 7.2 Hz, 3H); <sup>13</sup>C NMR (150 MHz, CDCl<sub>3</sub>) δ 171.0, 147.2, 134.1, 129.6, 129.2, 129.1, 128.6, 121.5, 116.2, 116.1, 65.7, 61.5, 38.0, 14.0; **HRMS** (ESI<sup>+</sup>) *m/z* calcd for C<sub>18</sub>H<sub>19</sub>N<sub>2</sub>O<sub>2</sub> [M+H]<sup>+</sup> 295.1441, found 295.1444.

.....

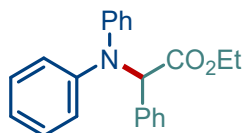

**ethyl 2-(diphenylamino)-2-phenylacetate (54)**

White solid; mp: 110-112 °C; <sup>1</sup>H NMR (600 MHz, CDCl<sub>3</sub>) δ 7.56-7.42 (m, 7H), 7.41-7.24 (m, 4H), 7.13-7.07 (m, 2H), 6.76 (t, *J* = 7.2 Hz, 1H), 6.43 (d, *J* = 7.8 Hz, 1H), 5.34 (s, 1H), 5.07 (s, 1H), 4.23-3.99 (m, 2H), 1.14 (t, *J* = 7.2 Hz, 3H); <sup>13</sup>C NMR (150 MHz, CDCl<sub>3</sub>) δ 171.5, 142.8, 139.1, 137.6, 130.3, 129.2, 128.9, 128.7, 128.5, 128.1, 127.4, 127.1, 117.7, 111.2, 61.7, 60.8, 13.9; **HRMS** (ESI<sup>+</sup>) *m/z* calcd for C<sub>22</sub>H<sub>22</sub>NO<sub>2</sub> [M+H]<sup>+</sup> 332.1645, found 332.1646.

.....

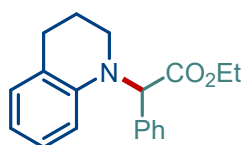

**ethyl 2-(3,4-dihydroquinolin-1(2H)-yl)-2-phenylacetate (56)**

Colorless oil; <sup>1</sup>H NMR (500 MHz, CDCl<sub>3</sub>) δ 7.39-7.27 (m, 5H), 7.06 (t, *J* = 7.5 Hz, 1H), 7.00 (d, *J* = 7.5 Hz, 1H), 6.67 (dd, *J* = 13.0, 7.5 Hz, 2H), 5.63 (s, 1H), 4.34-4.19 (m, 2H), 3.33-3.29 (m, 1H), 2.98-2.89 (m, 1H), 2.87-2.77 (m, 1H), 2.73-2.68 (m, 1H), 1.88-1.75 (m, 2H), 1.27 (t, *J* = 7.0 Hz, 3H). <sup>13</sup>C NMR (125 MHz, CDCl<sub>3</sub>) δ 172.1, 145.5, 135.6, 129.4, 128.7, 128.6, 128.0, 127.0, 123.8, 117.0, 110.4, 64.4, 61.0, 44.6, 28.2, 22.4, 14.3; **HRMS** (ESI<sup>+</sup>) *m/z* calcd for C<sub>19</sub>H<sub>22</sub>NO<sub>2</sub> [M+H]<sup>+</sup> 296.1645, found 296.1648.

.....

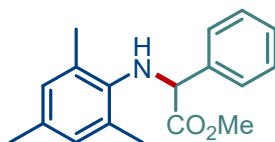

**methyl 2-(mesitylamino)-2-phenylacetate (57)**<sup>17</sup>

Colorless oil; <sup>1</sup>H NMR (500 MHz, CDCl<sub>3</sub>) δ 7.41 (d, *J* = 7.0 Hz, 2H), 7.36-7.28 (m, 3H), 6.76 (s, 2H), 4.87 (d, *J* = 10.0 Hz, 1H), 4.25 (d, *J* = 10.0 Hz, 1H), 3.68 (s, 3H), 2.20 (s, 6H), 2.19 (s, 3H). <sup>13</sup>C NMR (150 MHz, CDCl<sub>3</sub>) δ 174.0, 141.6, 138.7, 131.2, 129.6, 129.0, 128.7, 128.1, 127.0, 64.1, 52.4, 20.5, 18.8; HRMS (ESI<sup>+</sup>) *m/z* calcd for C<sub>18</sub>H<sub>22</sub>NO<sub>2</sub> [M+H]<sup>+</sup> 284.1645, found 284.1649.

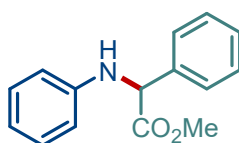

**methyl 2-phenyl-2-(phenylamino)acetate (58)**<sup>18</sup>

White solid; mp: 80-82 °C; <sup>1</sup>H NMR (600 MHz, CDCl<sub>3</sub>) δ 7.49 (d, *J* = 7.8 Hz, 2H), 7.34 (t, *J* = 7.2 Hz, 2H), 7.30 (t, *J* = 7.2 Hz, 1H), 7.11 (t, *J* = 7.8 Hz, 2H), 6.69 (t, *J* = 7.6 Hz, 2H), 6.55 (d, *J* = 7.8 Hz, 2H), 5.07 (s, 1H), 4.95 (s, 1H), 3.72 (s, 3H). <sup>13</sup>C NMR (150 MHz, CDCl<sub>3</sub>) δ 172.4, 146.0, 137.7, 129.3, 128.9, 128.4, 127.3, 118.2, 113.4, 60.8, 52.8; HRMS (ESI<sup>+</sup>) *m/z* calcd for C<sub>15</sub>H<sub>16</sub>NO<sub>2</sub> [M+H]<sup>+</sup> 242.1176, found 242.1180.

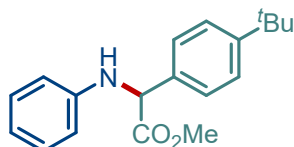

**methyl 2-(4-(*tert*-butyl)phenyl)-2-(phenylamino)acetate (59)**<sup>19</sup>

White solid; mp: 115-116 °C; <sup>1</sup>H NMR (600 MHz, CDCl<sub>3</sub>) δ 7.40 (d, *J* = 8.4 Hz, 2H), 7.36 (d, *J* = 8.4 Hz, 2H), 7.12 (t, *J* = 7.8 Hz, 2H), 6.70 (t, *J* = 7.2 Hz, 1H), 6.57 (d, *J* = 7.8 Hz, 2H), 5.06 (s, 1H), 4.86 (br, 1H), 3.72 (s, 3H), 1.30 (s, 9H). <sup>13</sup>C NMR (150 MHz, CDCl<sub>3</sub>) δ 172.6, 151.3, 146.2, 134.4, 129.3, 126.9, 125.9, 118.1, 113.4, 60.5, 52.7, 31.3; HRMS (ESI<sup>+</sup>) *m/z* calcd for C<sub>19</sub>H<sub>23</sub>NNaO<sub>2</sub> [M+Na]<sup>+</sup> 320.1621, found 320.1626.

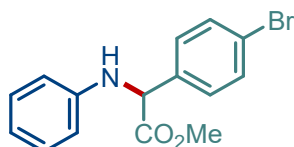

**methyl 2-(4-bromophenyl)-2-(phenylamino)acetate (60)**

White solid; mp: 115-116 °C; <sup>1</sup>H NMR (600 MHz, CDCl<sub>3</sub>) δ 7.47 (d, *J* = 8.4 Hz, 2H), 7.38

(d,  $J = 8.4$  Hz, 2H), 7.11 (t,  $J = 7.8$  Hz, 2H), 6.71 (t,  $J = 7.2$  Hz, 1H), 6.52 (d,  $J = 7.8$  Hz, 2H), 5.03 (s, 1H), 4.98 (s, 1H), 3.73 (s, 3H).  $^{13}\text{C}$  NMR (150 MHz,  $\text{CDCl}_3$ )  $\delta$  171.7, 145.6, 136.8, 132.0, 129.3, 129.0, 122.3, 118.4, 113.5, 60.2, 53.0; **HRMS** (ESI<sup>+</sup>)  $m/z$  calcd for  $\text{C}_{15}\text{H}_{14}\text{BrNNaO}_2$   $[\text{M}+\text{Na}]^+$  342.0100, found 342.0102.

.....

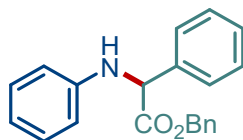

**benzyl 2-phenyl-2-(phenylamino)acetate (61)**

Colorless oil;  $^1\text{H}$  NMR (500 MHz,  $\text{CDCl}_3$ )  $\delta$  7.49 (d,  $J = 7.0$  Hz, 2H), 7.36-7.27 (m, 6H), 7.18-7.15 (m, 2H), 7.11 (dd,  $J = 8.5, 7.5$  Hz, 2H), 6.69 (t,  $J = 7.0$  Hz, 1H), 6.56 (d,  $J = 7.5$  Hz, 2H), 5.22-5.09 (m, 3H), 4.95 (d,  $J = 5.5$  Hz, 1H);  $^{13}\text{C}$  NMR (150 MHz,  $\text{CDCl}_3$ )  $\delta$  171.7, 145.9, 137.5, 135.3, 129.2, 128.8, 128.5, 128.30, 128.29, 127.9, 127.3, 118.2, 113.5, 67.3, 60.9; **HRMS** (ESI<sup>+</sup>)  $m/z$  calcd for  $\text{C}_{21}\text{H}_{20}\text{NO}_2$   $[\text{M}+\text{H}]^+$  318.1489, found 318.1490.

.....

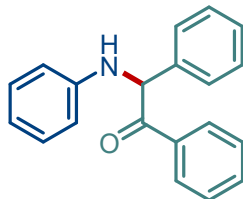

**1,2-diphenyl-2-(phenylamino)ethan-1-one (62)**

White solid; mp: 89-90 °C;  $^1\text{H}$  NMR (500 MHz,  $\text{CDCl}_3$ )  $\delta$  7.99 (d,  $J = 7.5$  Hz, 2H), 7.52 (t,  $J = 7.5$  Hz, 1H), 7.43 (dd,  $J = 15.0, 7.5$  Hz, 4H), 7.27 (t,  $J = 7.5$  Hz, 2H), 7.19 (t,  $J = 7.5$  Hz, 1H), 7.12 (t,  $J = 7.5$  Hz, 2H), 6.68 (t,  $J = 8.5$  Hz, 3H), 6.02 (s, 1H), 5.41 (s, 1H).  $^{13}\text{C}$  NMR (150 MHz,  $\text{CDCl}_3$ )  $\delta$  197.0, 146.1, 137.7, 135.0, 133.5, 129.2, 129.0, 128.8, 128.7, 128.09, 128.07, 117.8, 113.5, 62.7; **HRMS** (ESI<sup>+</sup>)  $m/z$  calcd for  $\text{C}_{20}\text{H}_{18}\text{NO}$   $[\text{M}+\text{H}]^+$  288.1383, found 288.1380.

.....

## 6 References

- 1 Z. Liu, S. Cao, W. Yu, J. Wu, F. Yi, E. A. Anderson, X. Bi, Site-selective C–H benzylation of alkanes with *N*-trifosylhydrazones leading to alkyl aromatics, *Chem* 2020, **6**, 2110–2124.
- 2 Gaussian 16 Revision C.01, M. J. Frisch, G. W. Trucks, H. B. Schlegel, G. E. Scuseria, M. A. Robb, J. R. Cheeseman, G. Scalmani, V. Barone, G. A. Petersson, H. Nakatsuji, X. Li, M. Caricato, A. V. Marenich, J. Bloino, B. G. Janesko, R. Gomperts, B. Mennucci, H. P. Hratchian, J. V. Ortiz, A. F. Izmaylov, J. L. Sonnenberg, D. Williams-Young, F. Ding, F. Lipparini, F. Egidi, J. Goings, B. Peng, A. Petrone, T. Henderson, D. Ranasinghe, V. G. Zakrzewski, J. Gao, N. Rega, G. Zheng, W. Liang, M. Hada, M. Ehara, K. Toyota, R. Fukuda, J. Hasegawa, M. Ishida, T. Nakajima, Y. Honda, O. Kitao, H. Nakai, T. Vreven, K. Throssell, J. A. Montgomery, Jr., J. E. Peralta, F. Ogliaro, M. J. Bearpark, J. J. Heyd, E. N. Brothers, K. N. Kudin, V. N. Staroverov, T. A. Keith, R. Kobayashi, J. Normand, K. Raghavachari, A. P. Rendell, J. C. Burant, S. S. Iyengar, J. Tomasi, M. Cossi, J. M. Millam, M. Klene, C. Adamo, R. Cammi, J. W. Ochterski, R. L. Martin, K. Morokuma, O. Farkas, J. B. Foresman, and D. J. Fox, Gaussian, Inc., Wallingford CT, 2019.
- 3 J.-D. Chai, M. Head-Gordon, Long-range corrected hybrid density functionals with damped atom–atom dispersion corrections, *Phys. Chem. Chem. Phys.*, 2008, **10**, 6615–6620.
- 4 F. Weigend, R. Ahlrichs, Balanced Basis Sets of Split Valence, Triple Zeta Valence and Quadruple Zeta Valence Quality for H to Rn: Design and Assessment of Accuracy, *Phys. Chem. Chem. Phys.* 2005, **7**, 3297–3305.
- 5 (a) A. D. Becke, Density-functional exchange-energy approximation with correct asymptotic behavior, *Phys. Rev. A* 1988, **38**, 3098–3100. (b) A. D. Becke, Density-functional thermochemistry. III. The role of exact exchange, *J. Chem. Phys.* 1993, **98**, 5648–5652. (c) C. Lee, W. Yang, R. G. Parr, Development of the Colic-Salvetti correlation-energy formula into a functional of the electron density, *Phys. Rev. B* 1988, **37**, 785–789. (d) X. Qi, H. Zhang, A. Shao, L. Zhu, T. Xu, M. Gao, C. Liu, Y. Lan, Silver migration facilitates isocyanide-alkyne [3 + 2] cycloaddition reactions: combined experimental and theoretical study, *ACS Catal.* 2015, **5**, 6640–6647.
- 6 S. Grimme, J. Antony, S. Ehrlich, H. Krieg, A consistent and accurate ab initio parametrization of density functional dispersion correction (DFT-D) for the 94 elements H–Pu, *J. Chem. Phys.* 2010, **132**, 154104.
- 7 C. Gonzalez, H. B. Schlegel, An improved algorithm for reaction path following, *J. Chem. Phys.*, 1989, **90**, 2154–2161.
- 8 C. Gonzalez, H. B. Schlegel, Reaction path following in mass-weighted internal coordinates, *J. Chem. Phys.*, 1990, **94**, 5523–5527.
- 9 A. V. Marenich, C. J. Cramer, D. G. Truhlar, Universal solvation model based on solute electron density and on a continuum model of the solvent defined by the bulk dielectric constant and atomic surface tensions, *J. Phys. Chem. B*, 2009, **113**, 6378–6396.
- 10 C. Y. Legault, CYLview, 1.0b; Université de Sherbrooke: Canada, 2009. Available at: <http://www.cylview.org> (accessed September, 2014).
- 11 I. Mizota, Y. Tadano, Y. Nakamura, T. Haramiishi, M. Hotta, M. Shimizu, Tandem *N,N*-dialkylation reaction of *N*-trimethylsilyl  $\alpha$ -iminoesters utilizing an umpolung reaction and characteristics of the silyl substituent: synthesis of pyrrolidine, piperidine, and iminodiacetate,



- Org. Lett.* 2019, **21**, 2663–2667.
- 12 Q.-H. Deng, H.-W. Xu, A. W.-H. Yuen, Z.-J. Xu, C.-M. Che, Ruthenium-catalyzed one-pot carbenoid N–H insertion reactions and diastereoselective synthesis of prolines, *Org. Lett.* 2008, **10**, 1529–1532.
  - 13 M. Ortega, M. A. Rodríguez and P. J. Campos, Photoreduction of imines. An environmentally friendly approach to obtain amines, *Tetrahedron* 2005, **61**, 11686–11691.
  - 14 H. Wang, X. Sun, M. Hu, X. Zhang, L. Xie, S. Gu, Bromination of  $\alpha$ -diazo phenylacetate derivatives using cobalt(II) bromide, *Adv. Synth. Catal.* 2020, **362**, 3347–3351.
  - 15 H. Saito, D. Morita, T. Uchiyama, M. Miyake, S. Miyairi, Cinchona alkaloids induce asymmetry in the insertion reaction of thermally generated carbenes into N–H bonds, *Tetrahedron Lett* 2012, **53**, 6662–6664.
  - 16 K. Ramakrishna, C. Sivasankar, Phosphine ligands stabilized Cu(I) catalysts for carbene insertion into the N–H bond, *J Organomet Chem* 2016, **805**, 122–129.
  - 17 H. Huang, C. Yu, X. Li, Y. Zhang, Y. Zhang, X. Chen, P. S. Mariano, H. Xie, W. Wang, Synthesis of aldehydes by organocatalytic formylation reactions of boronic acids with glyoxylic acid, *Angew. Chem. Int. Ed.* 2017, **56**, 8201–8205.
  - 18 L. G. Furniel, A. C. B. Burtoloso, Copper-catalyzed N–H insertion reactions from sulfoxonium ylides, *Tetrahedron* 2020, **76**, 131313.
  - 19 X. Xu, C. Li, Z. Tao, Y. Pan, Hemin-catalyzed, cyclodextrin-assisted insertion of carbenoids into N–H bonds, *Adv. Synth. Catal.* 2015, **357**, 3341–3345.

## 7 Copies of $^1\text{H}$ -, $^{13}\text{C}$ - and $^{19}\text{F}$ - Spectra

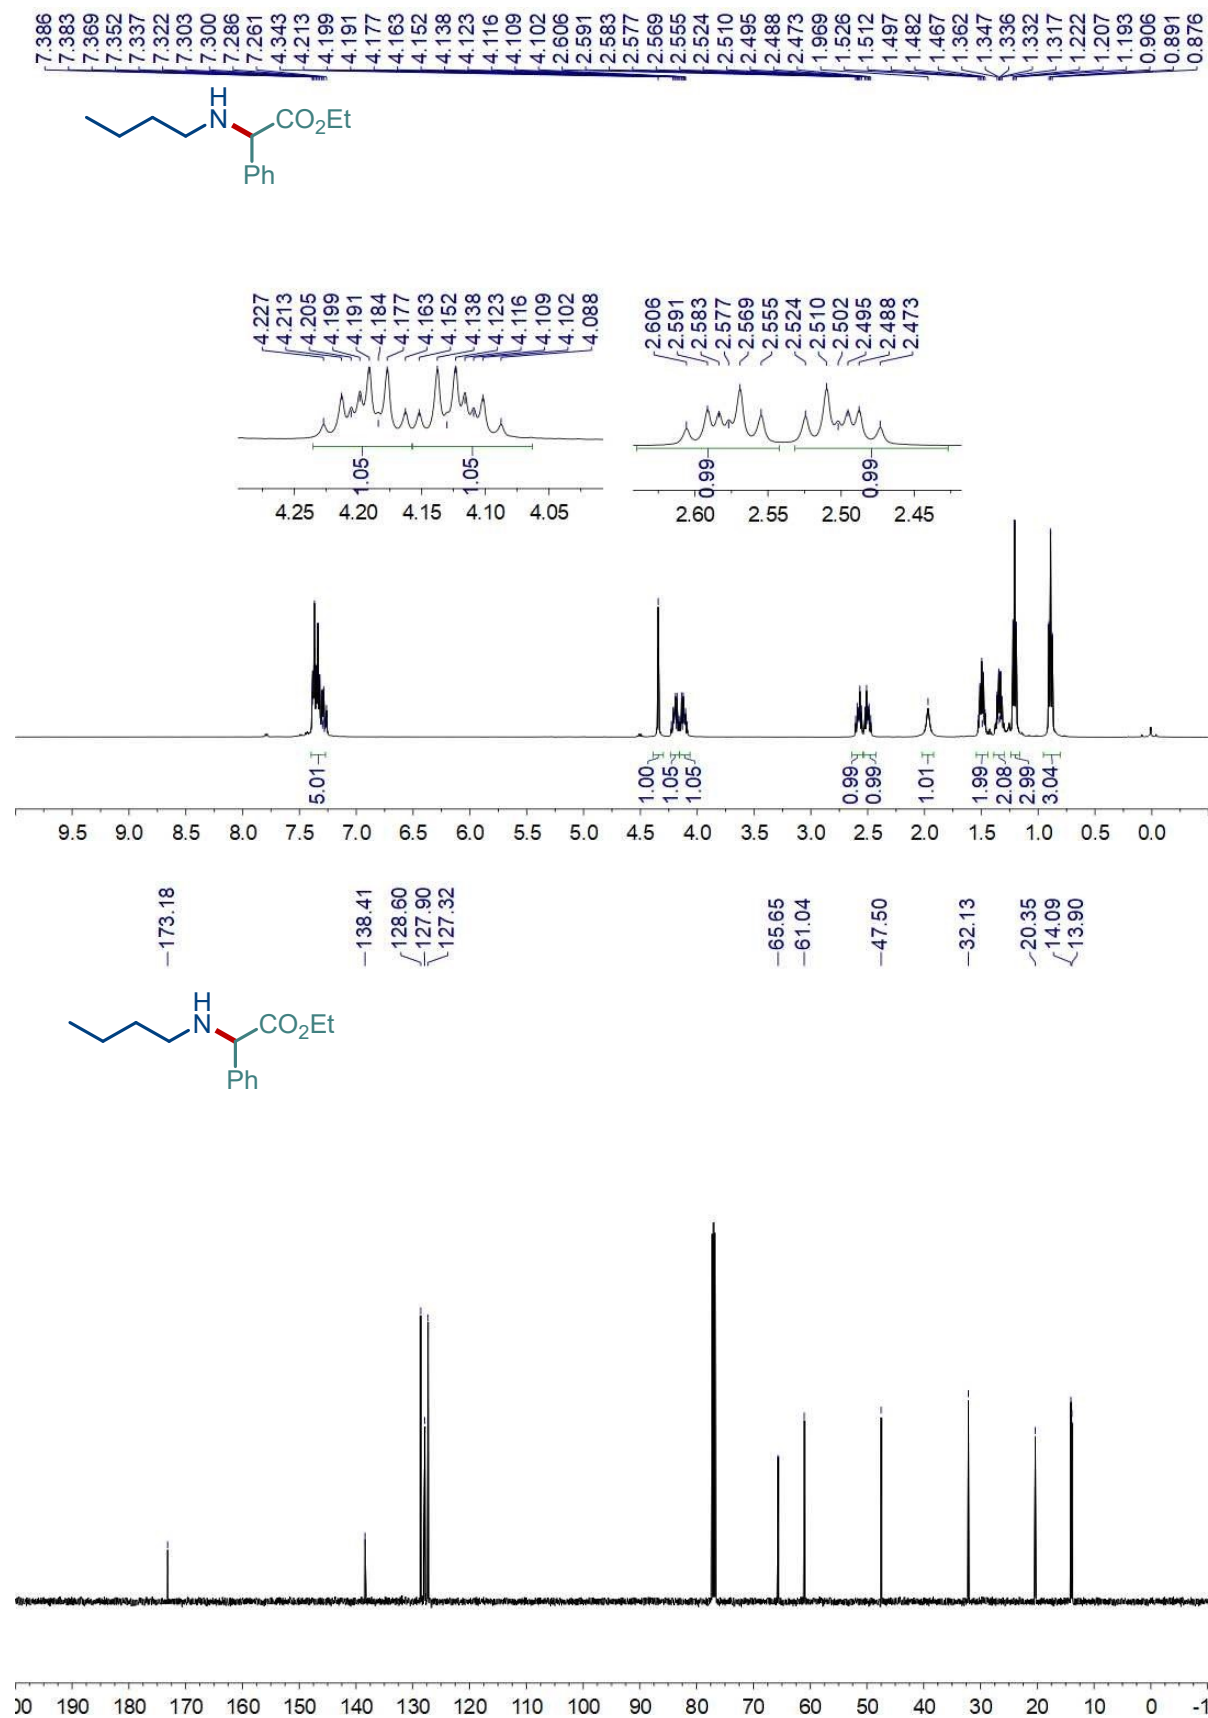

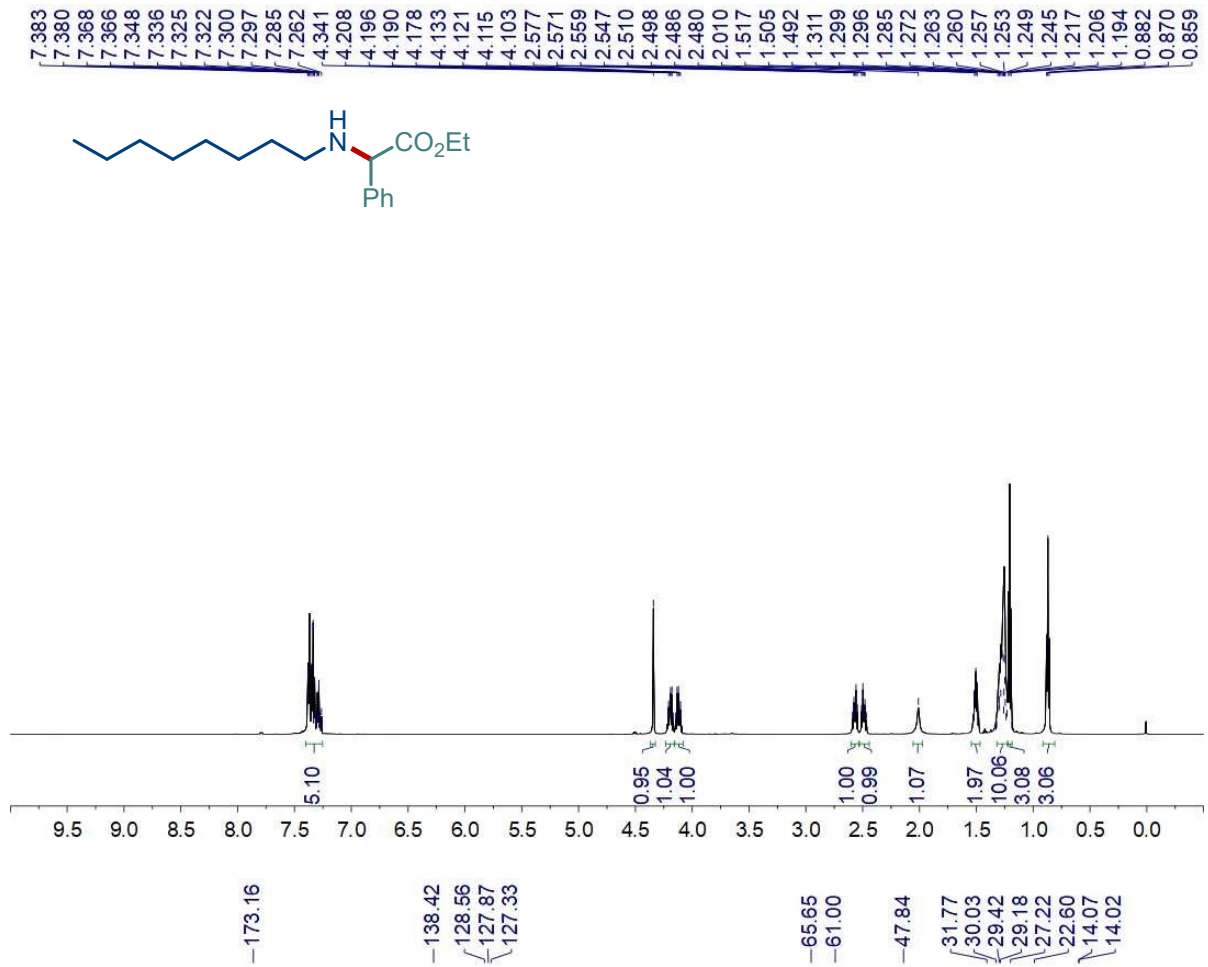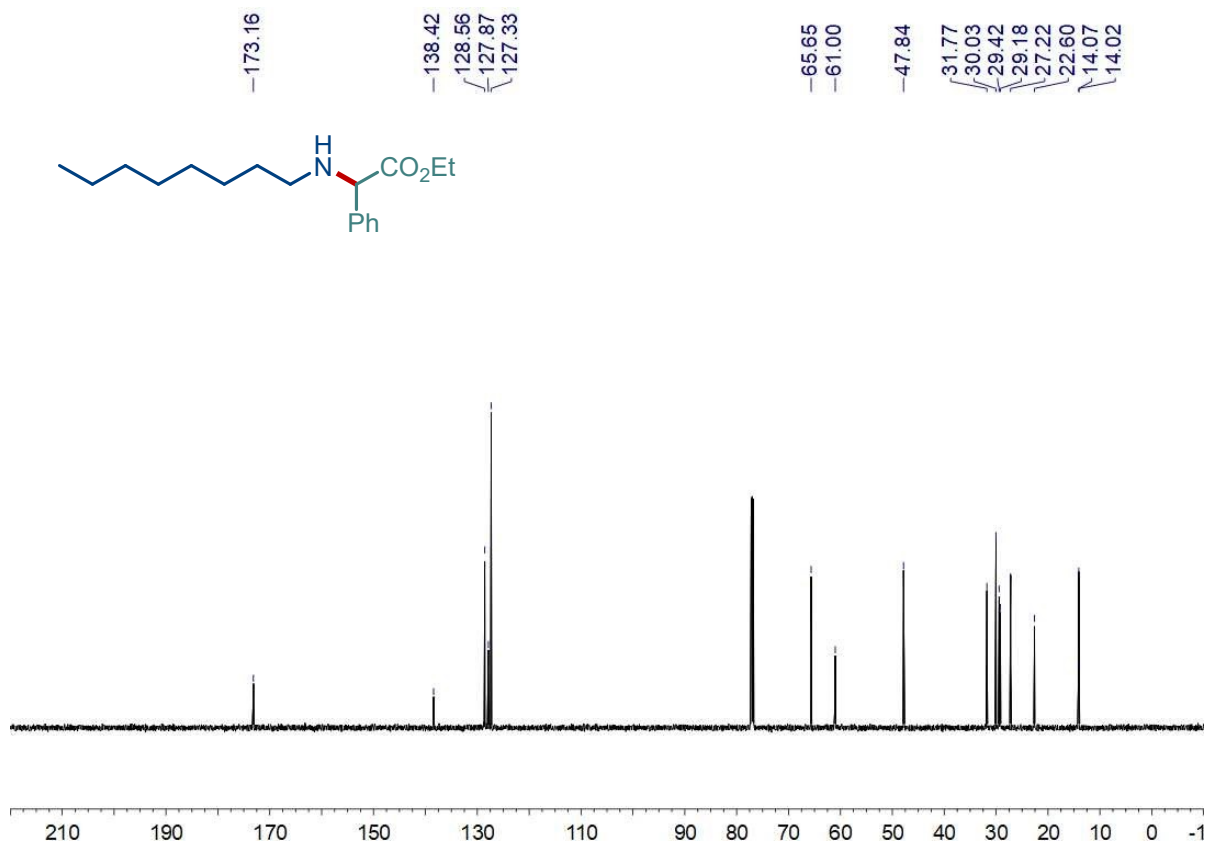

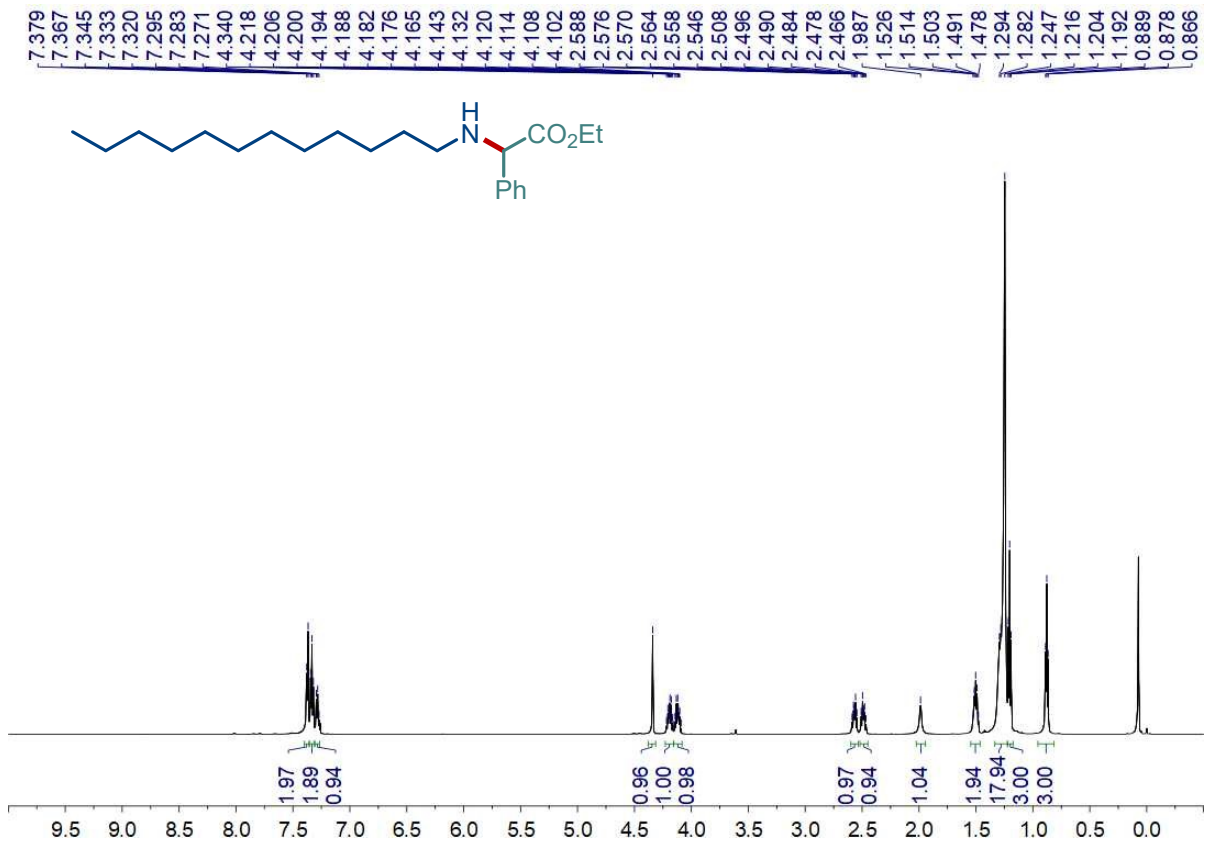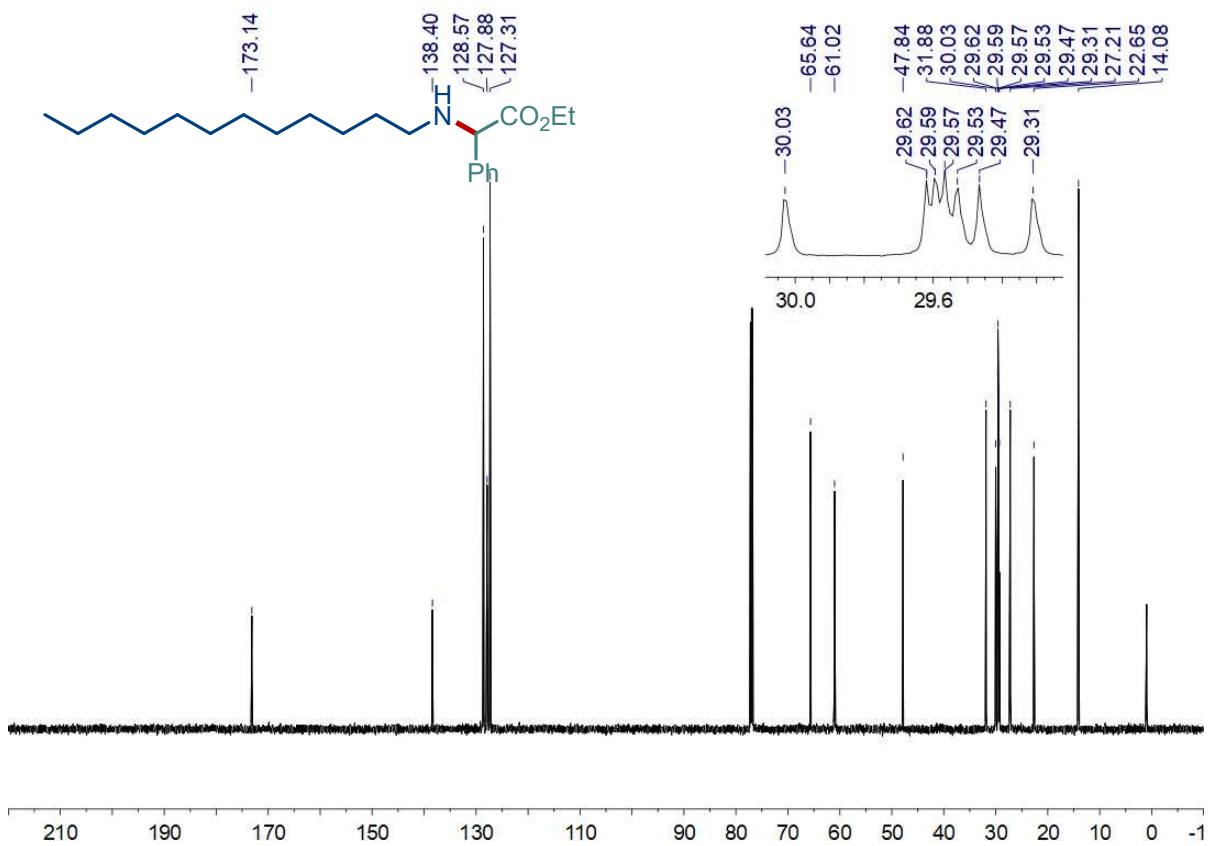

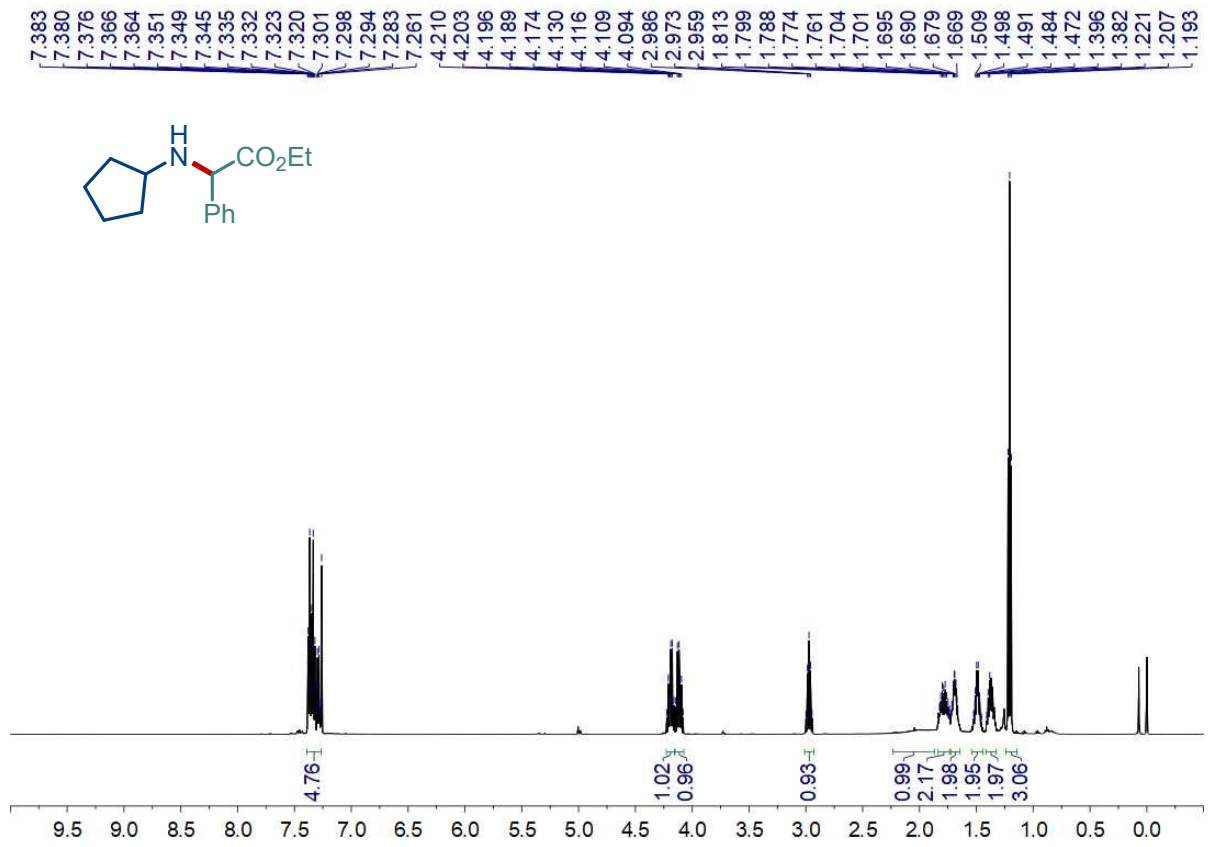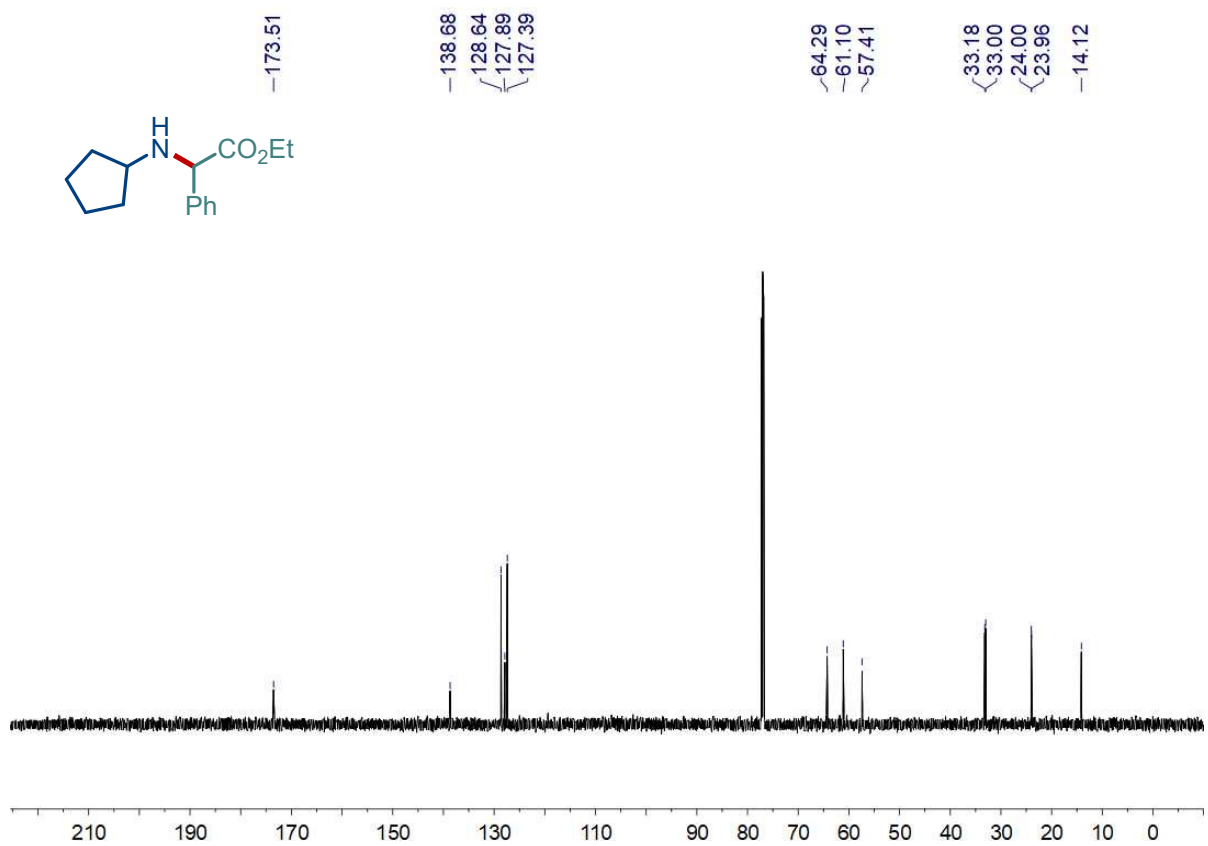

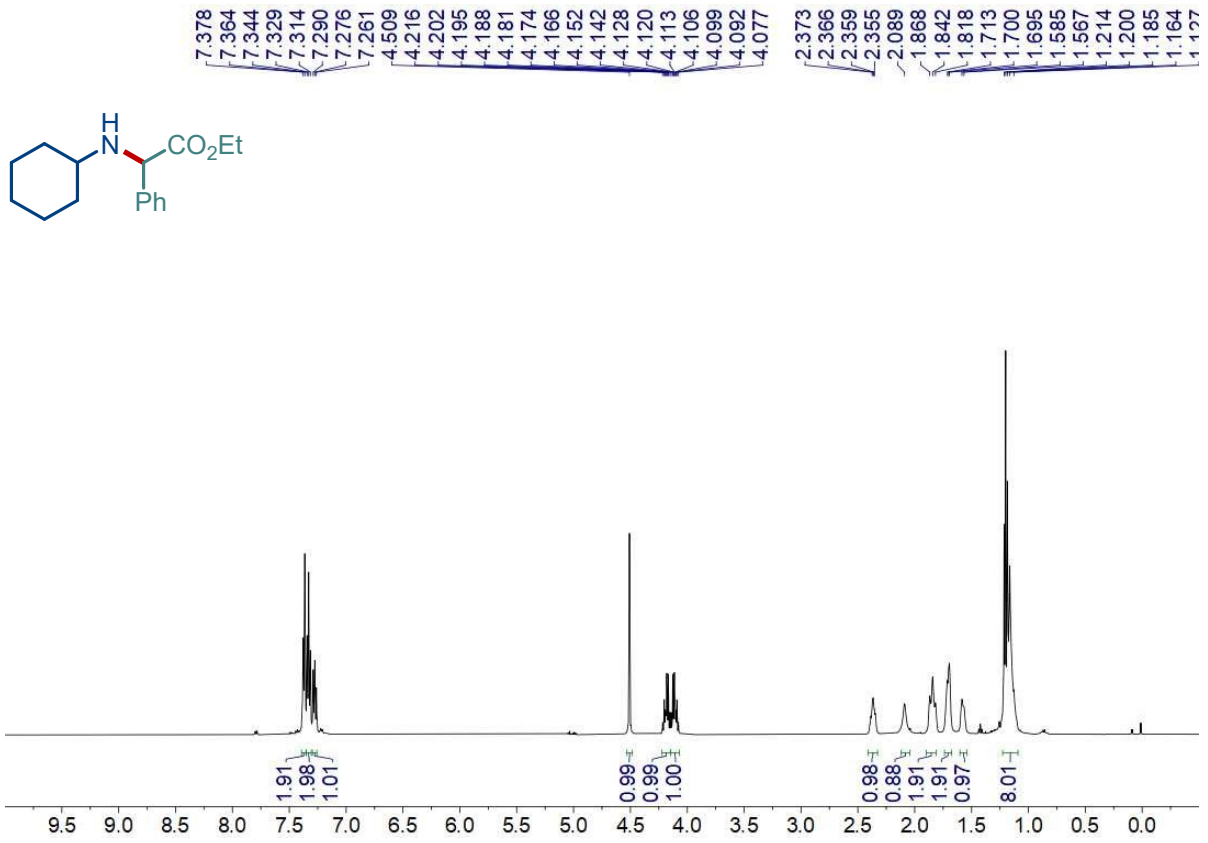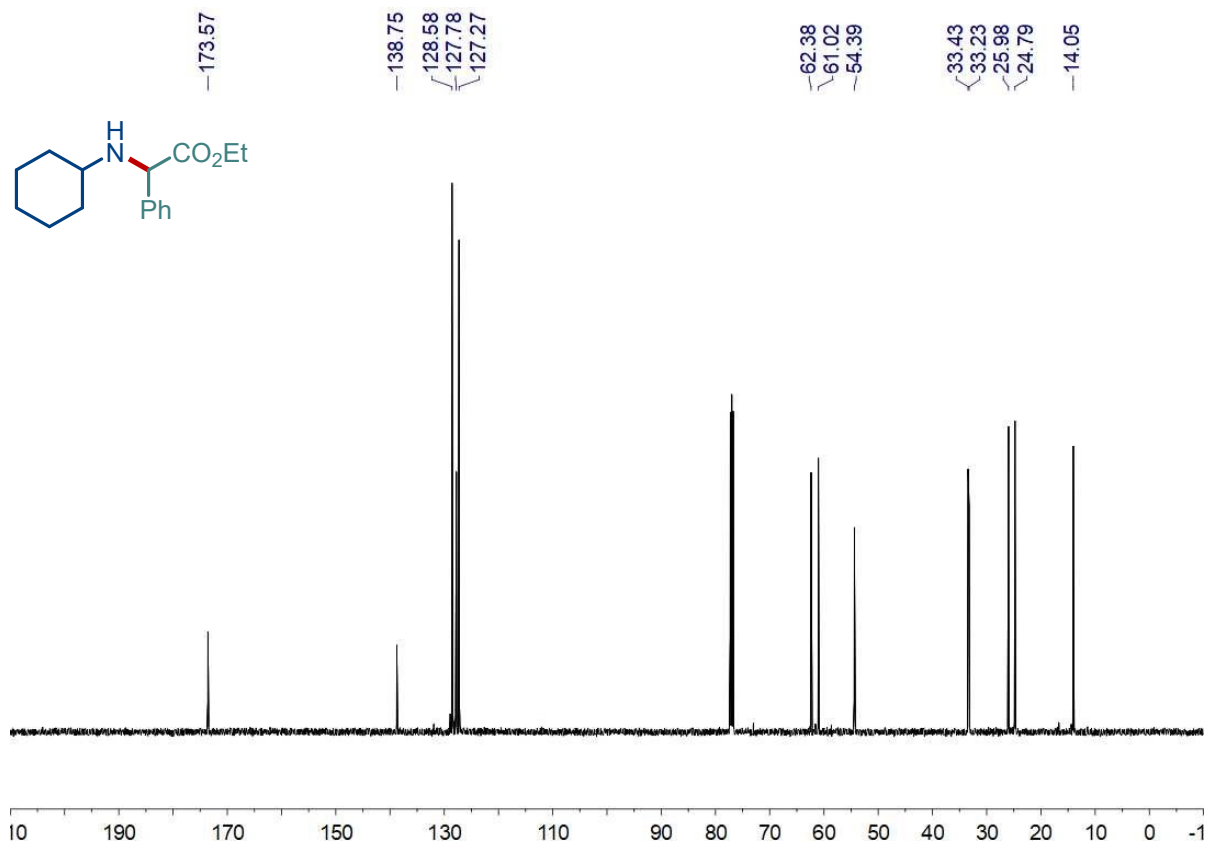

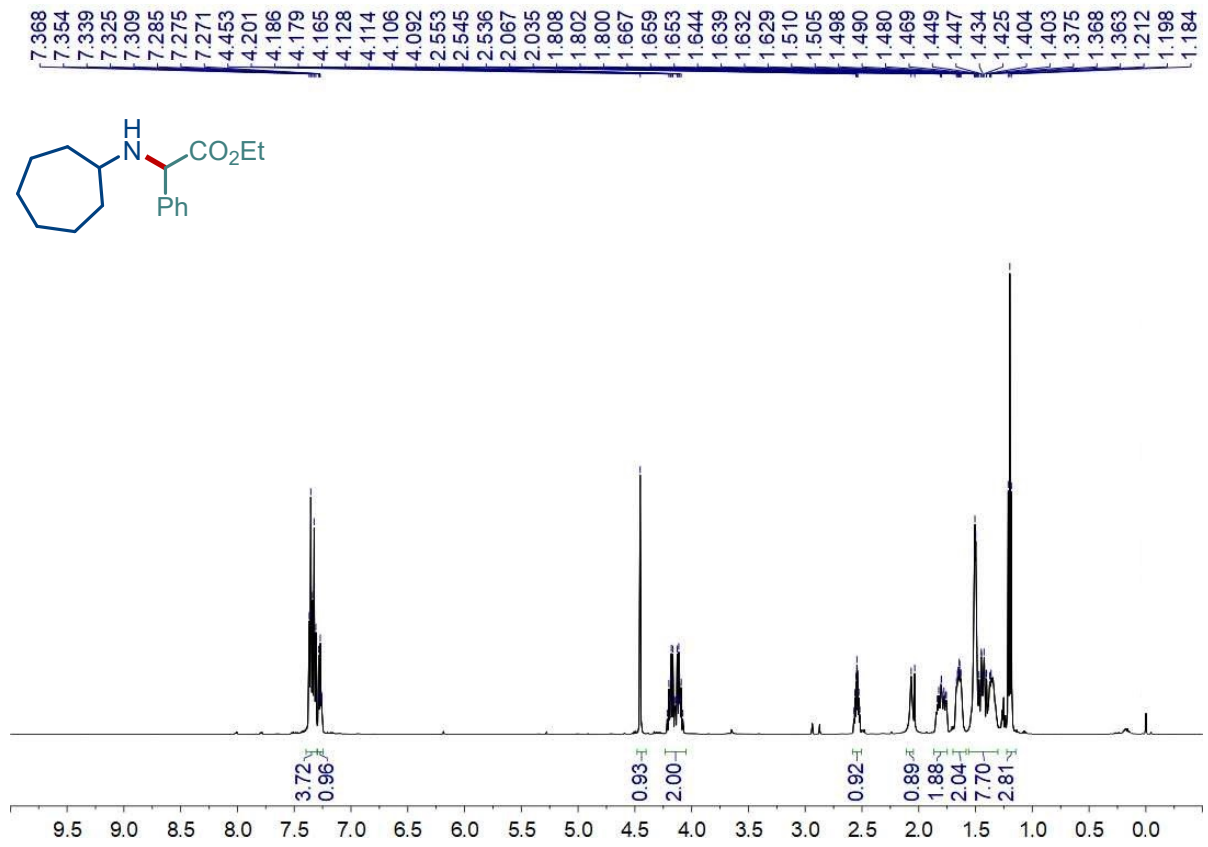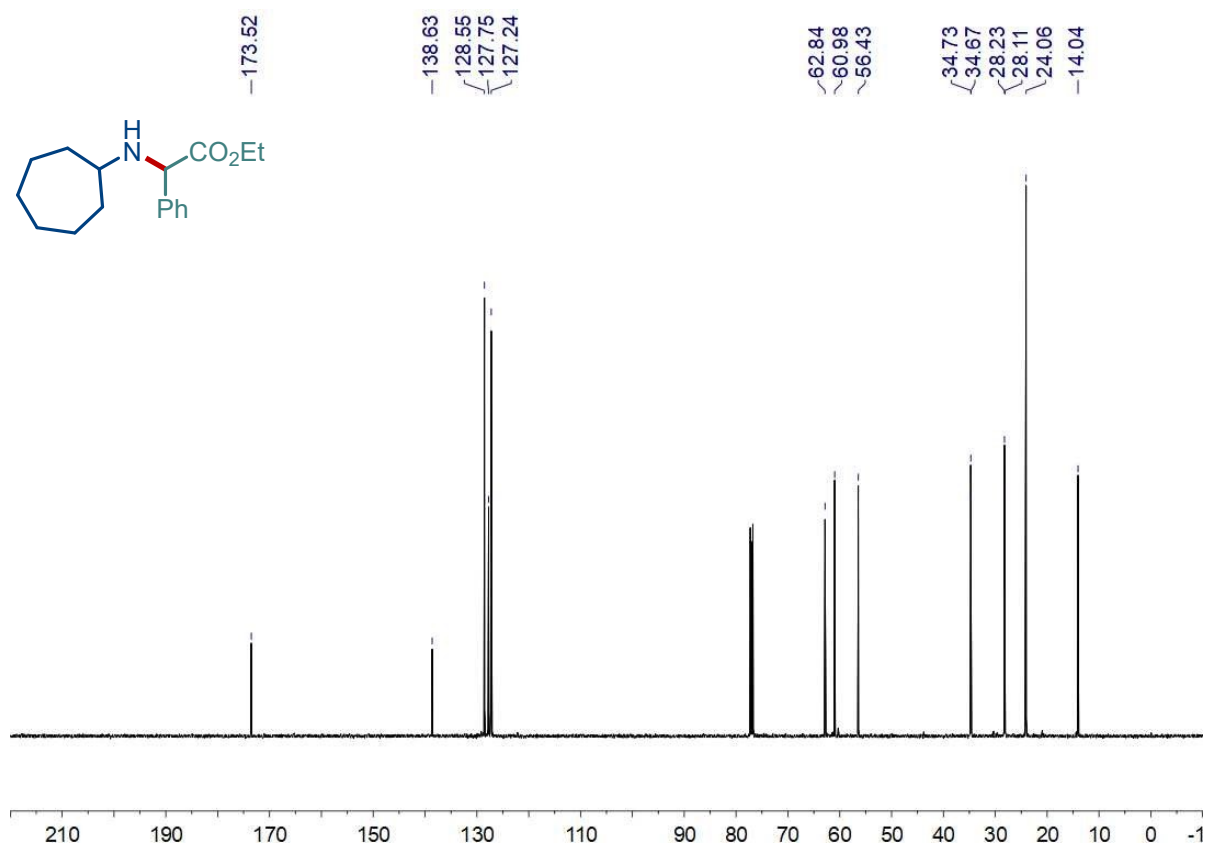

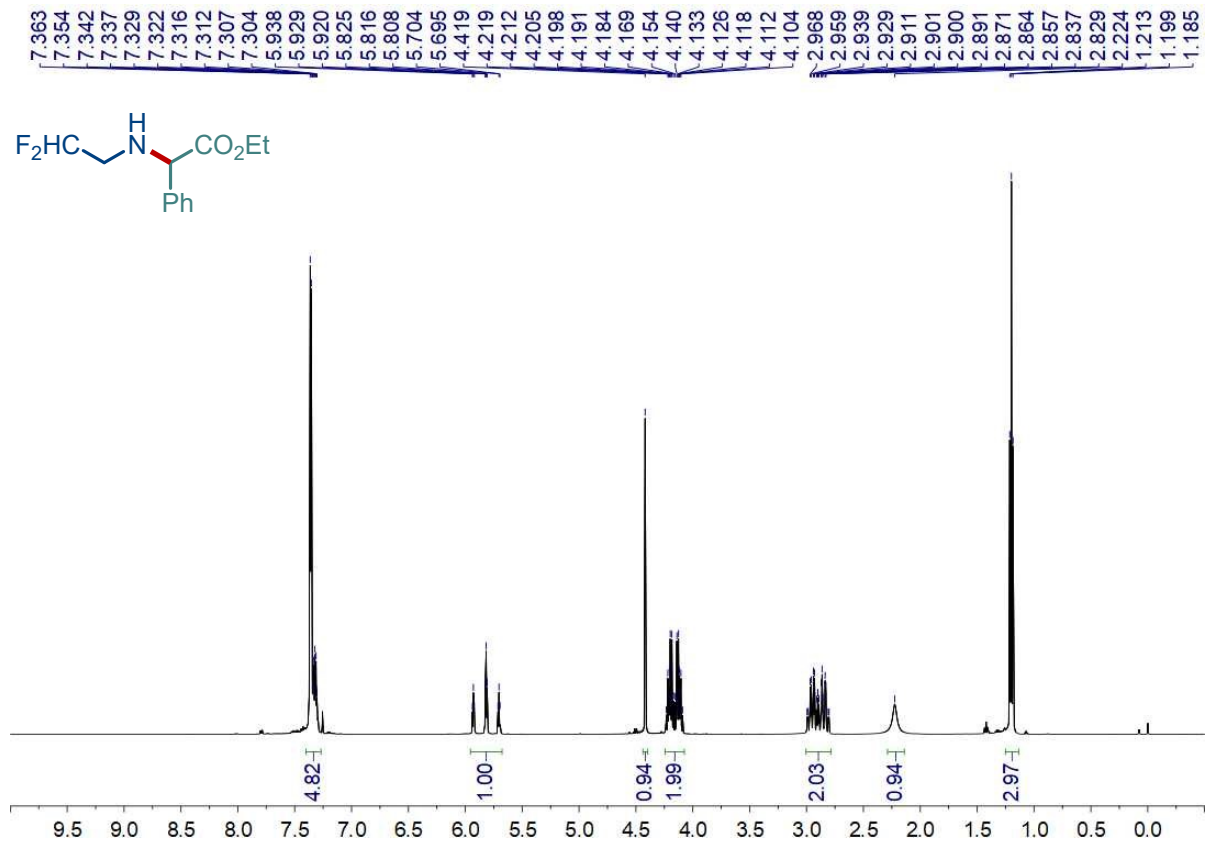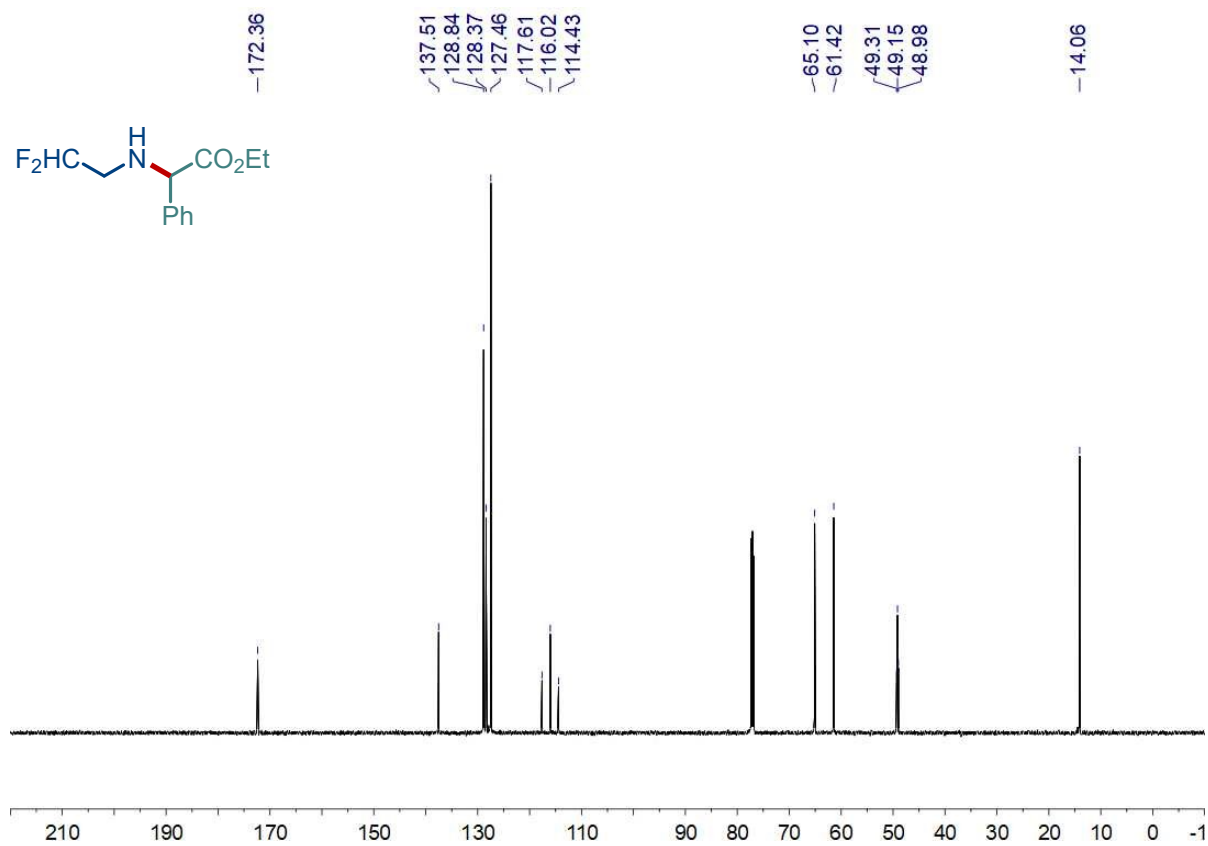



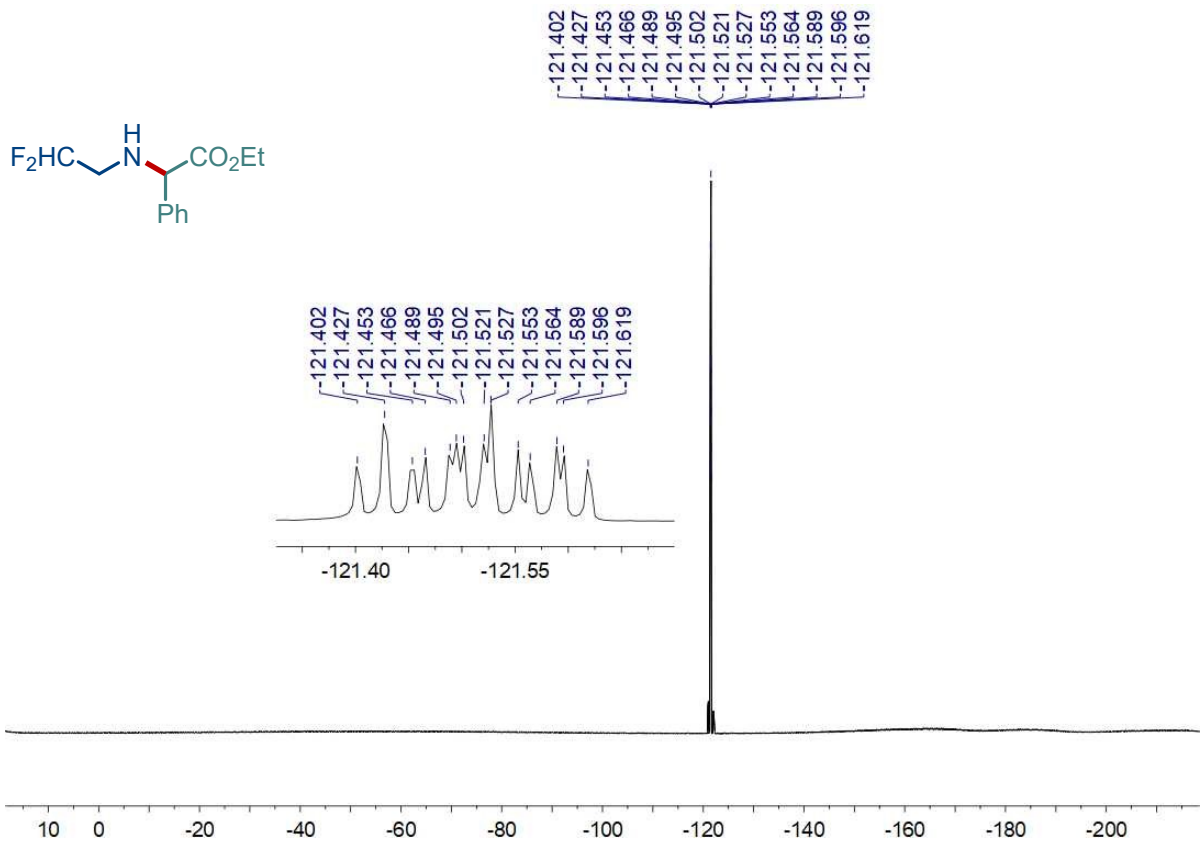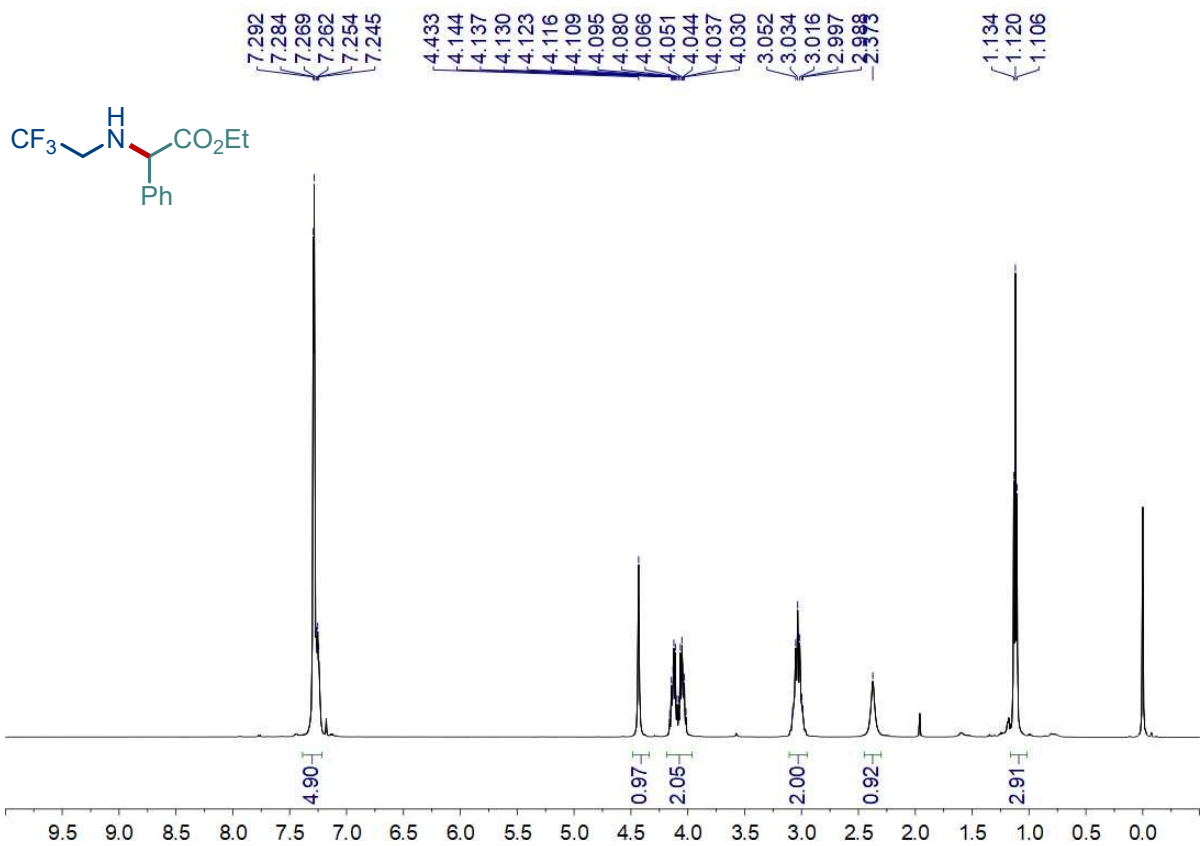

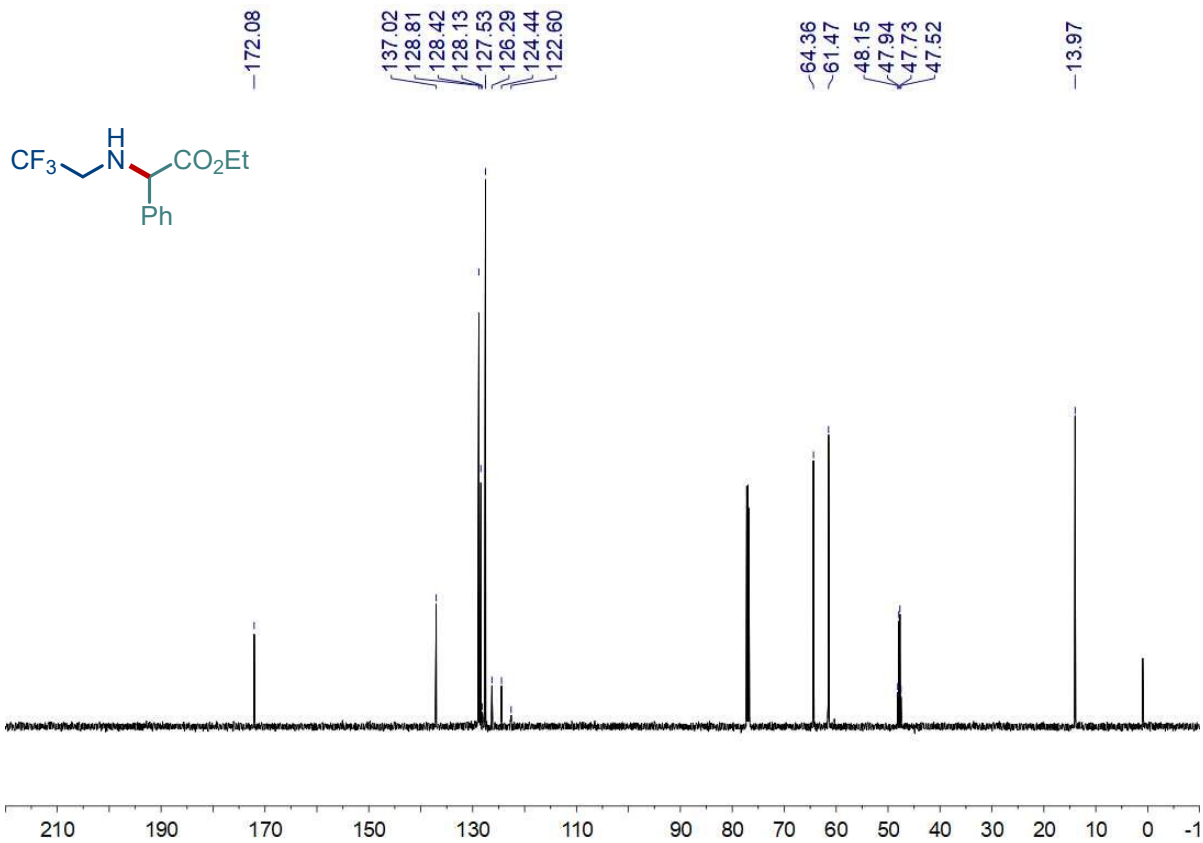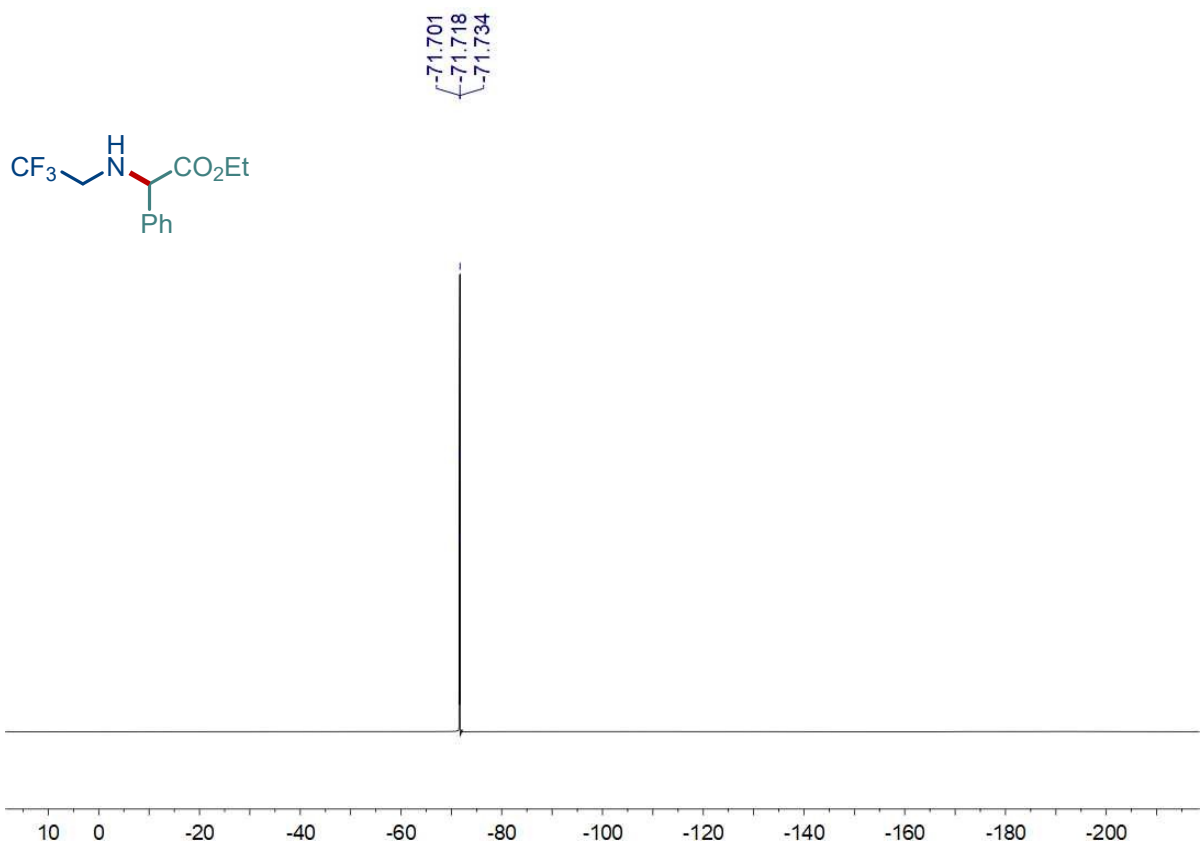

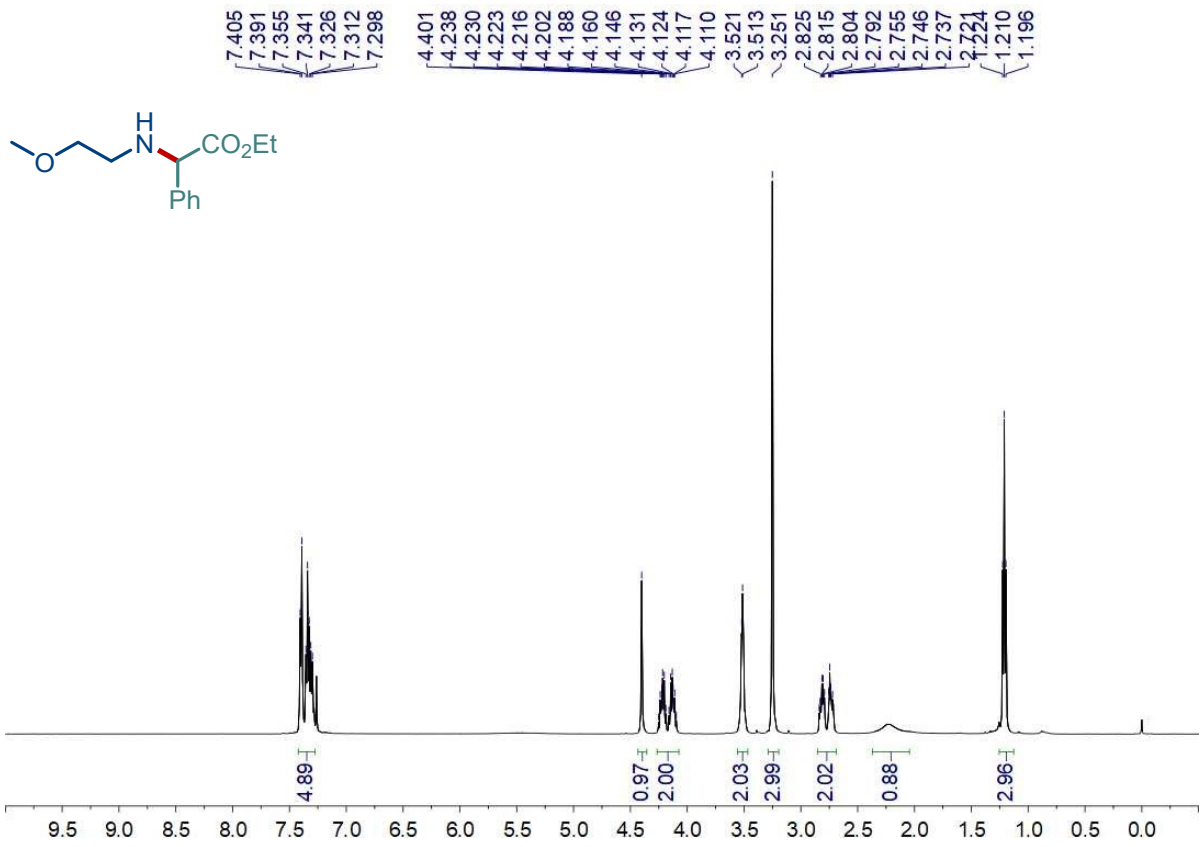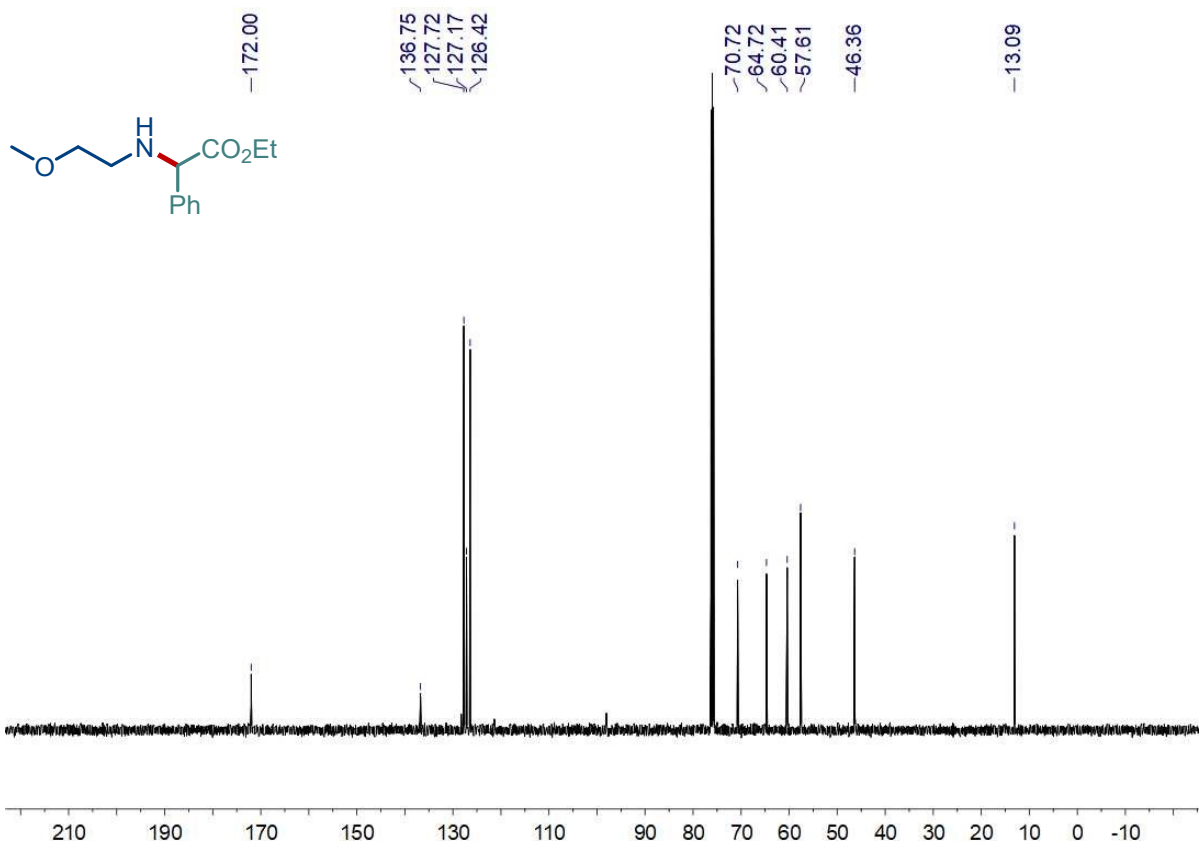

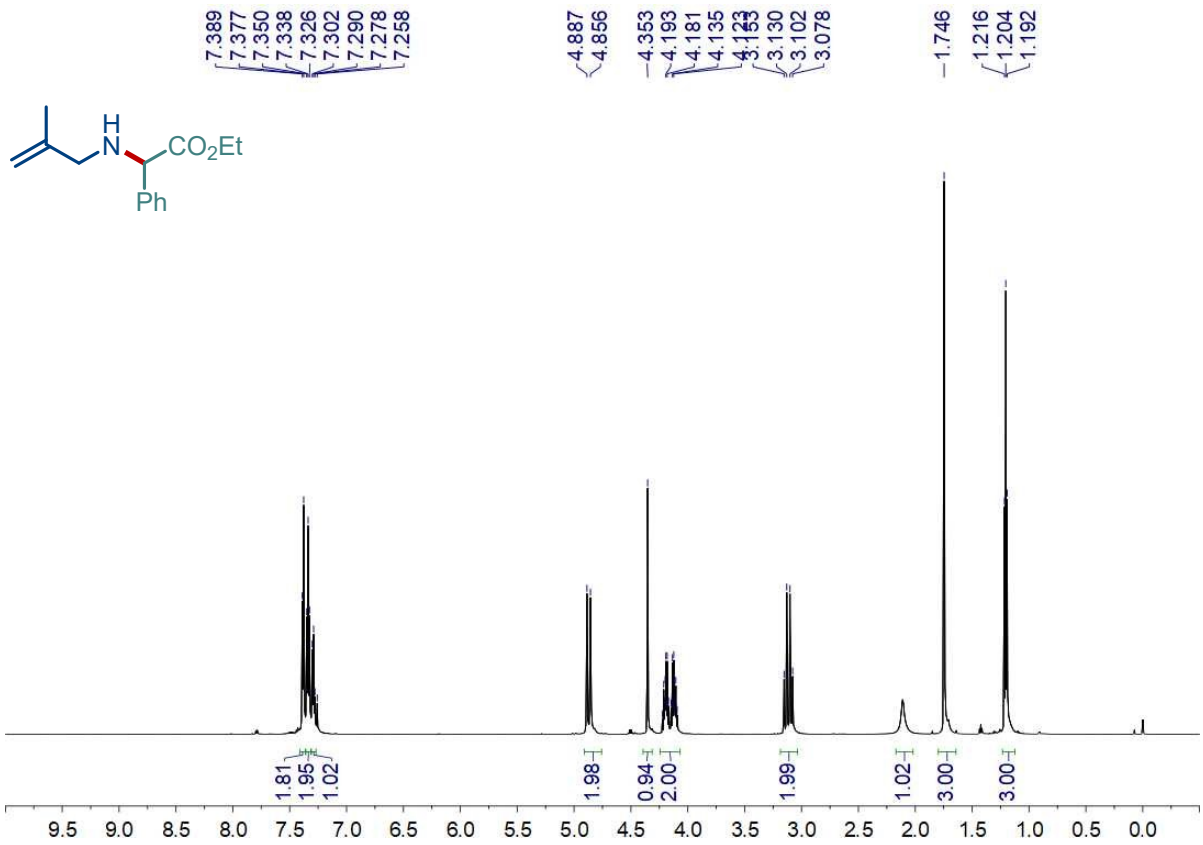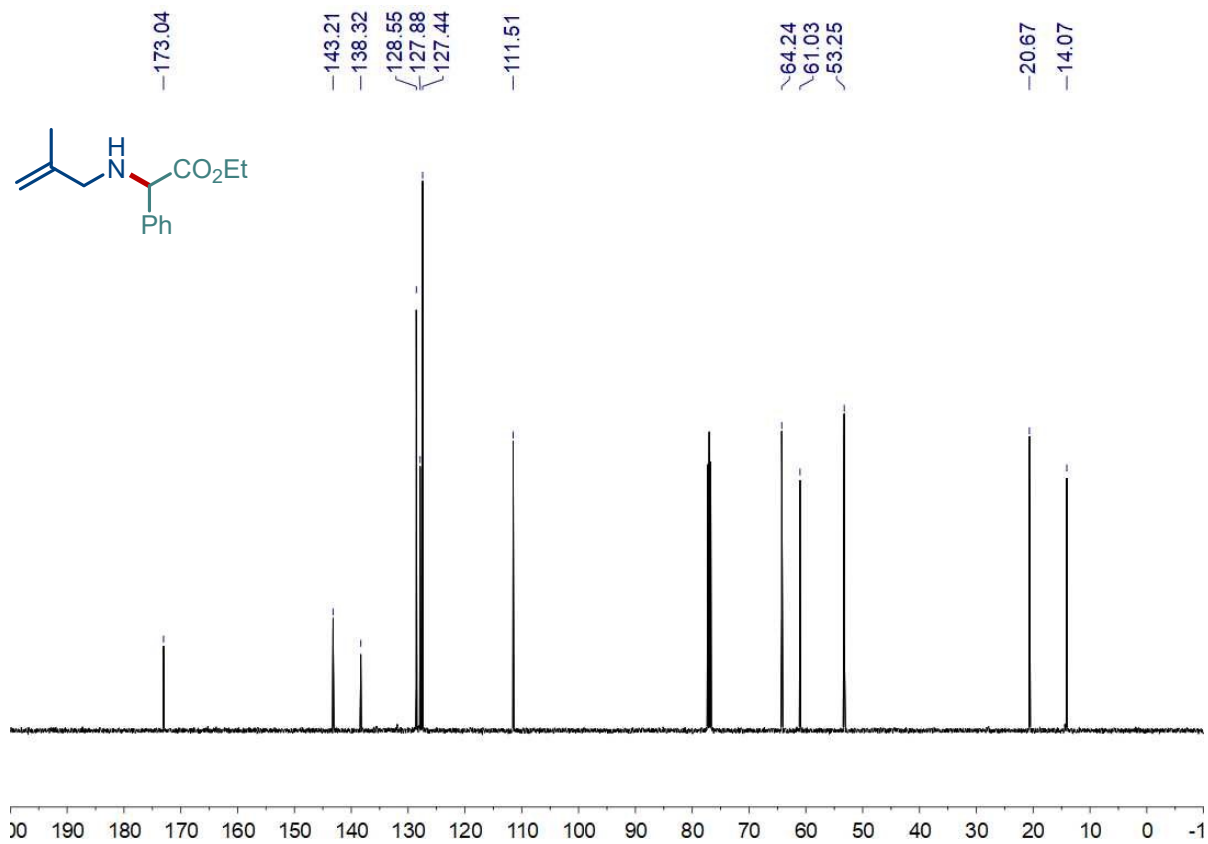

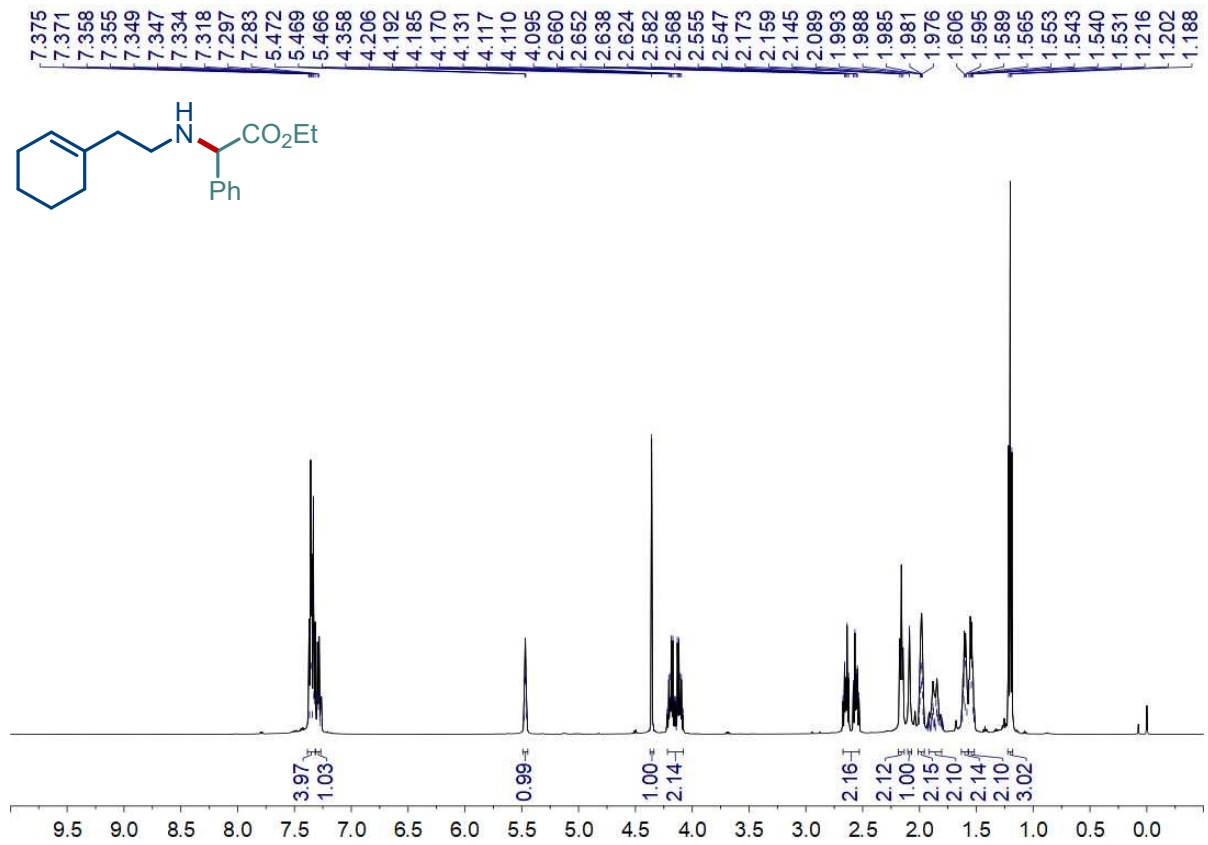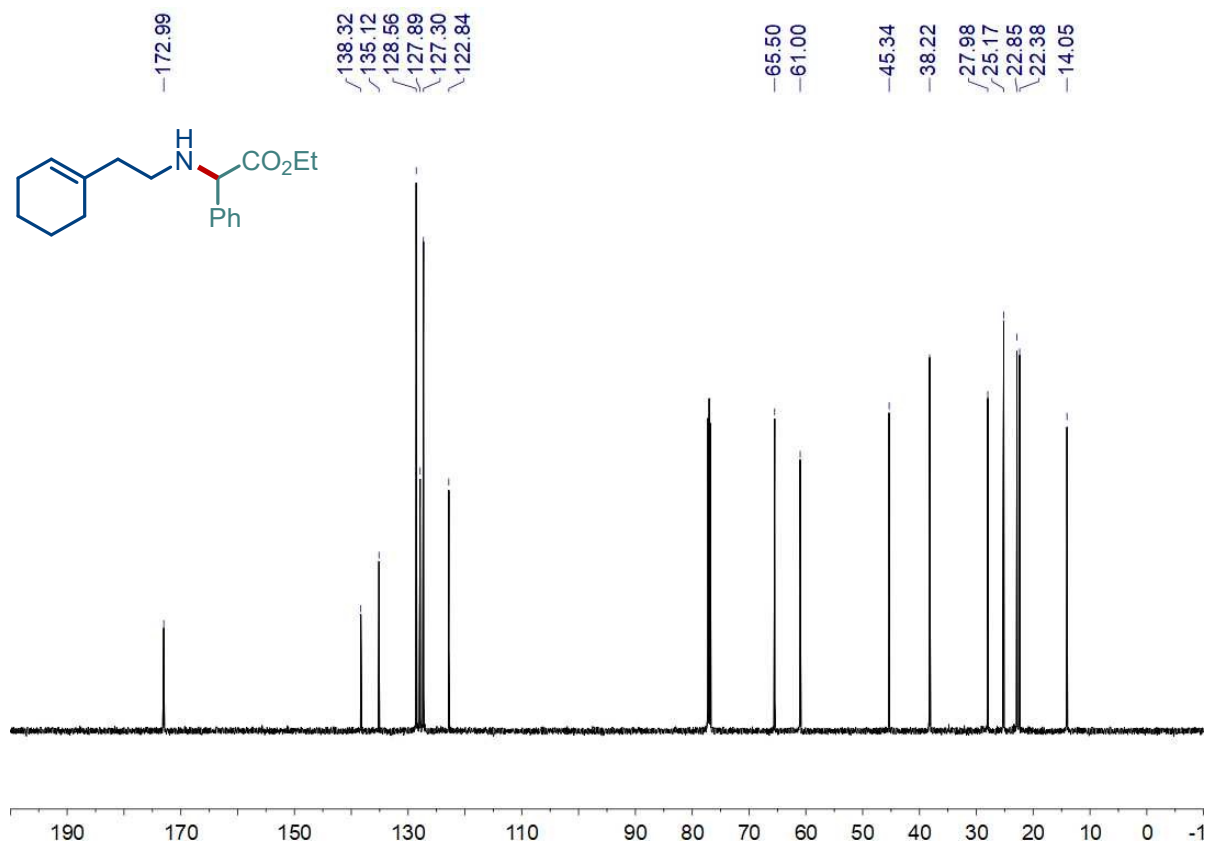

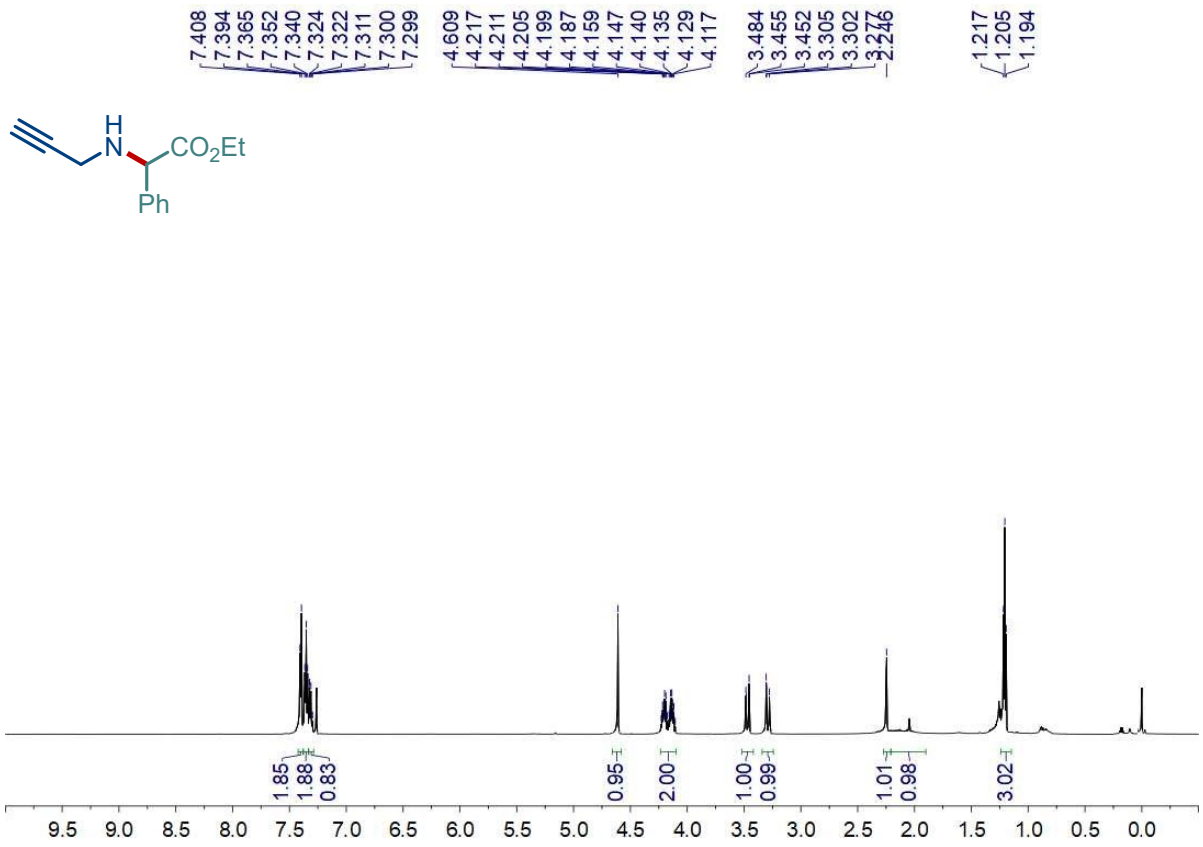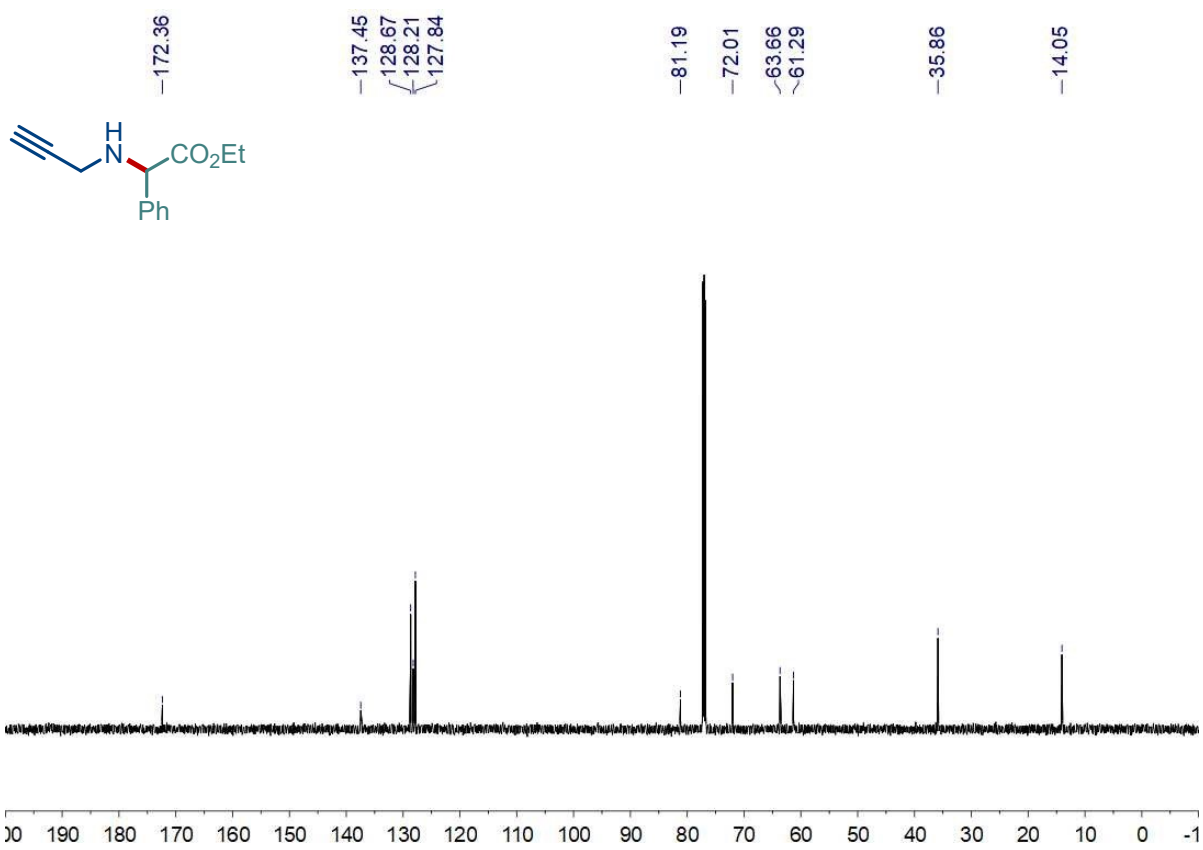

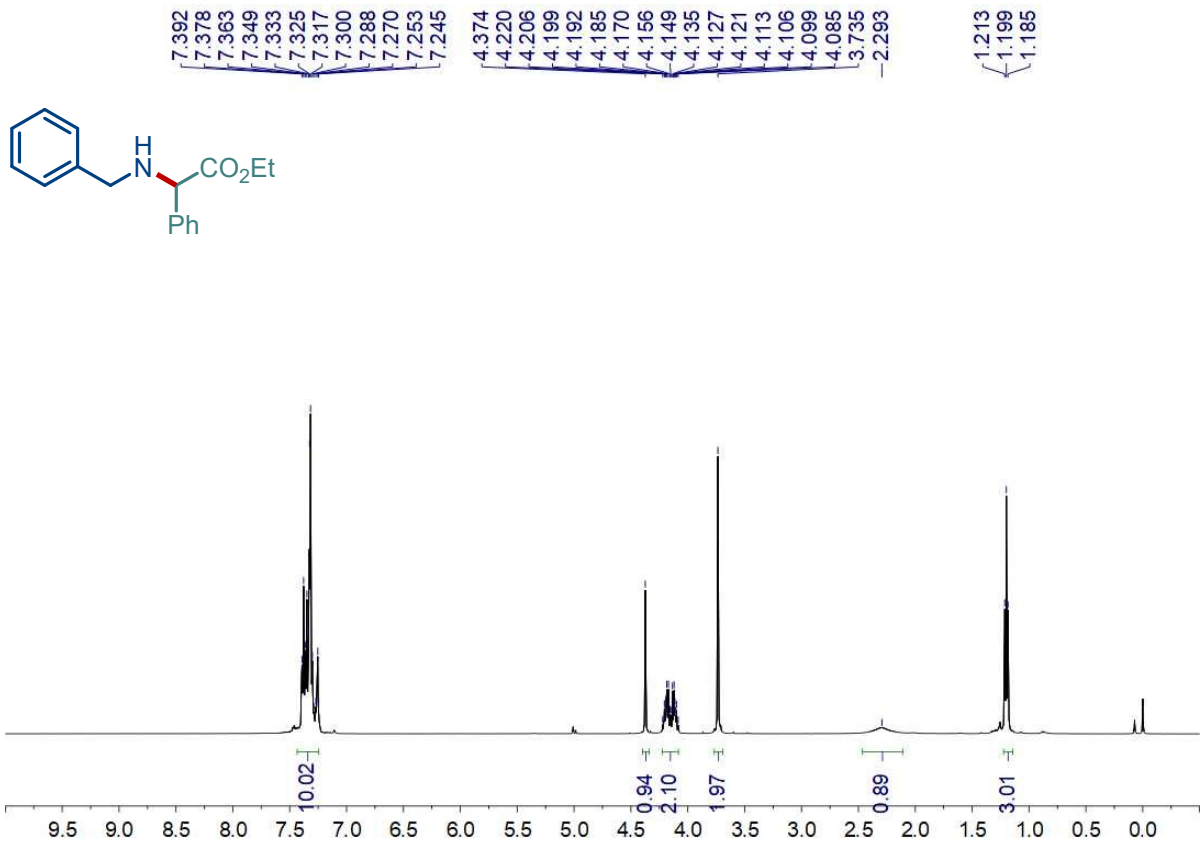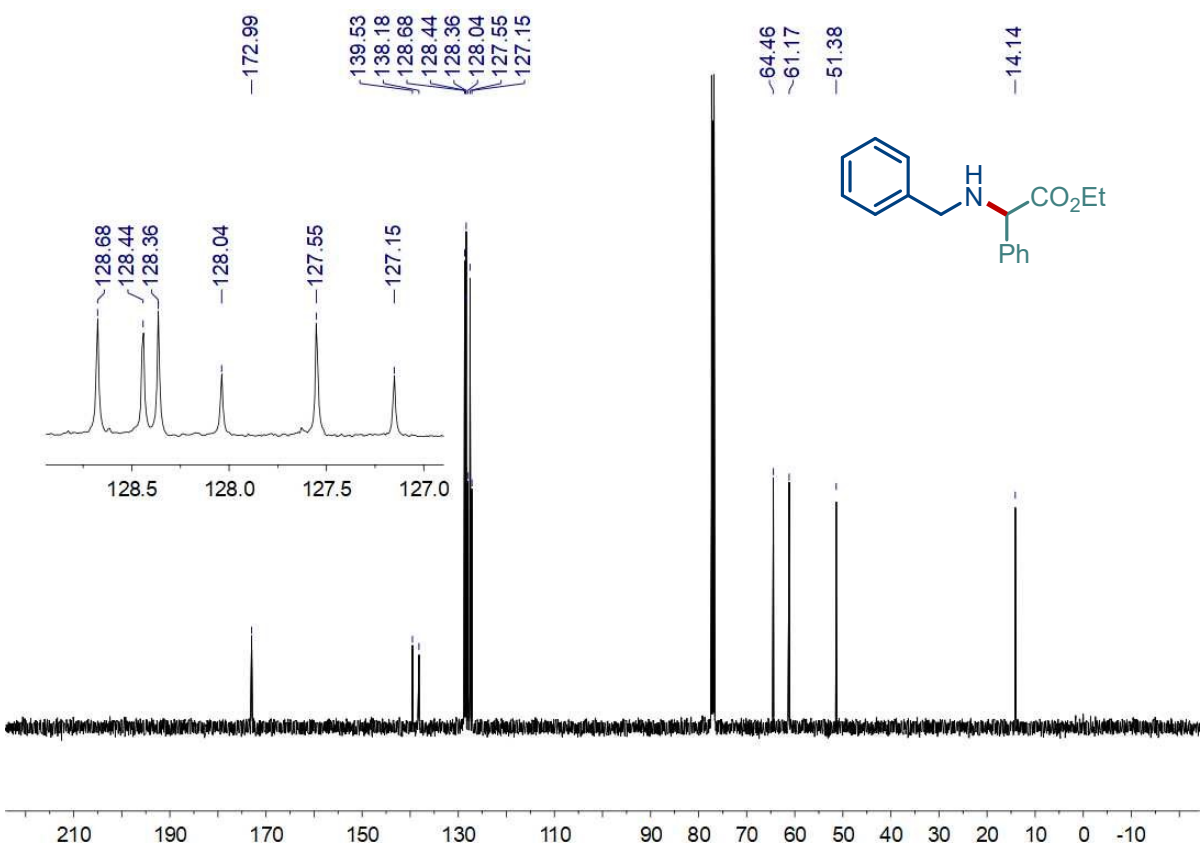

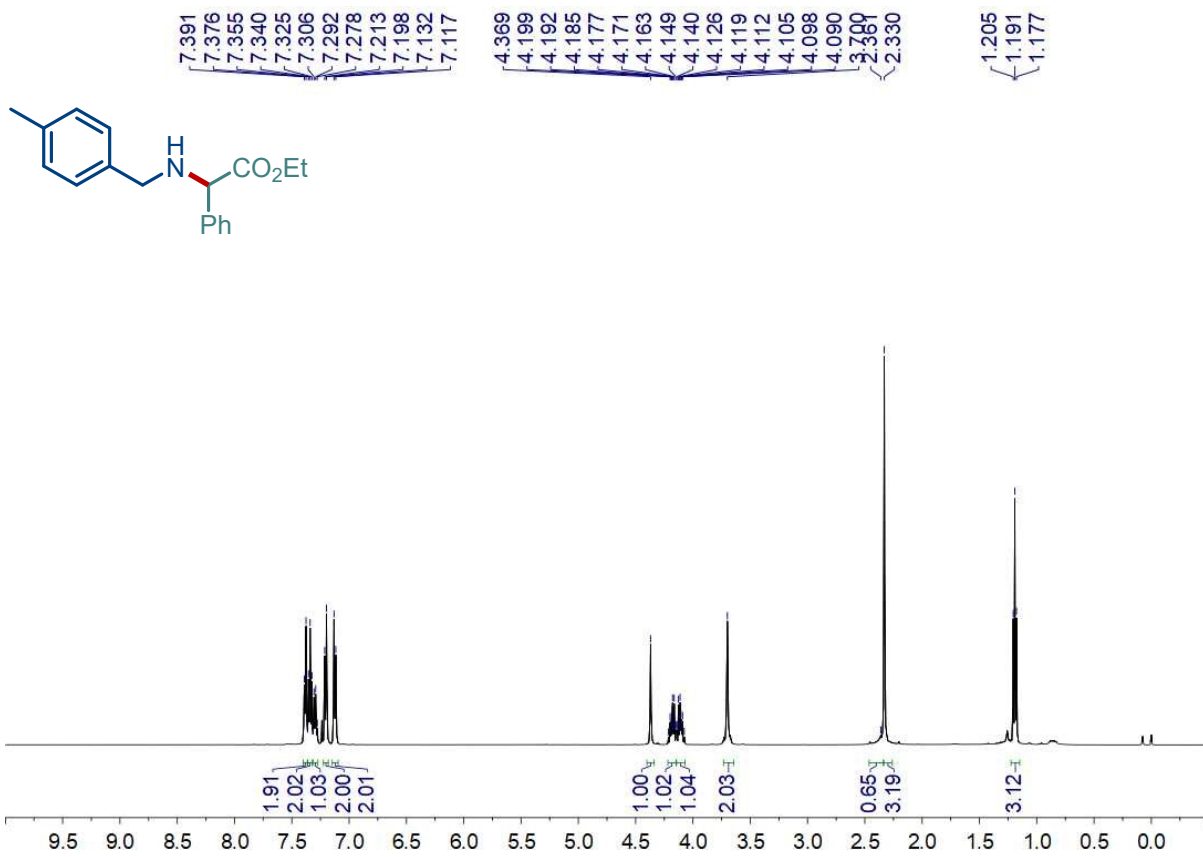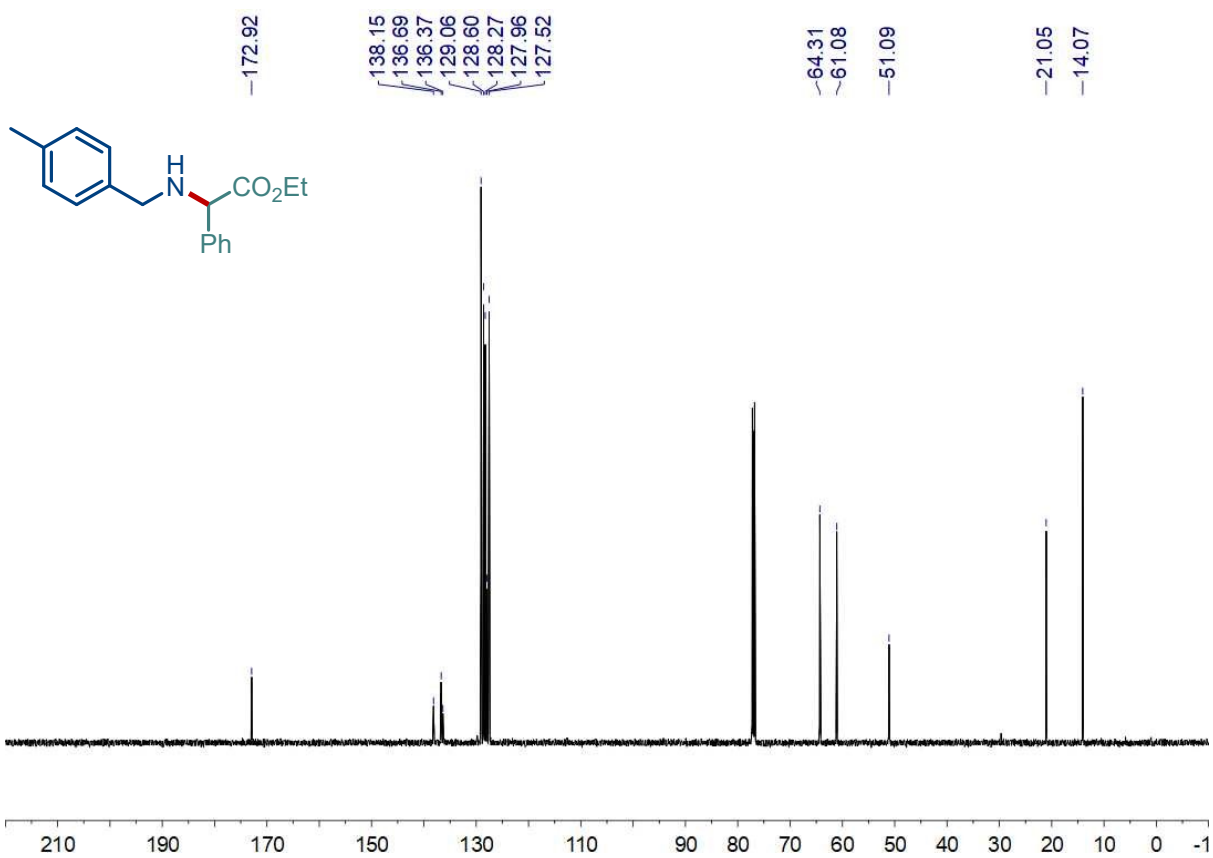



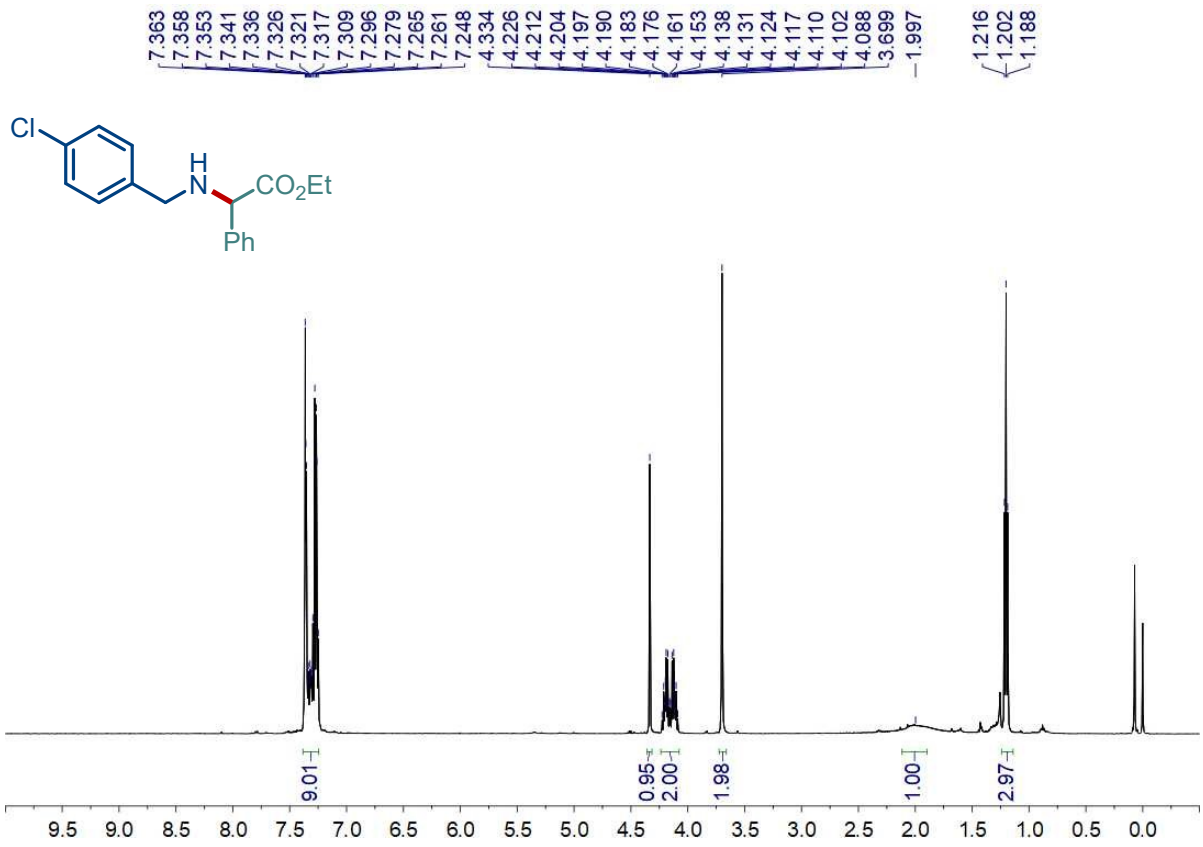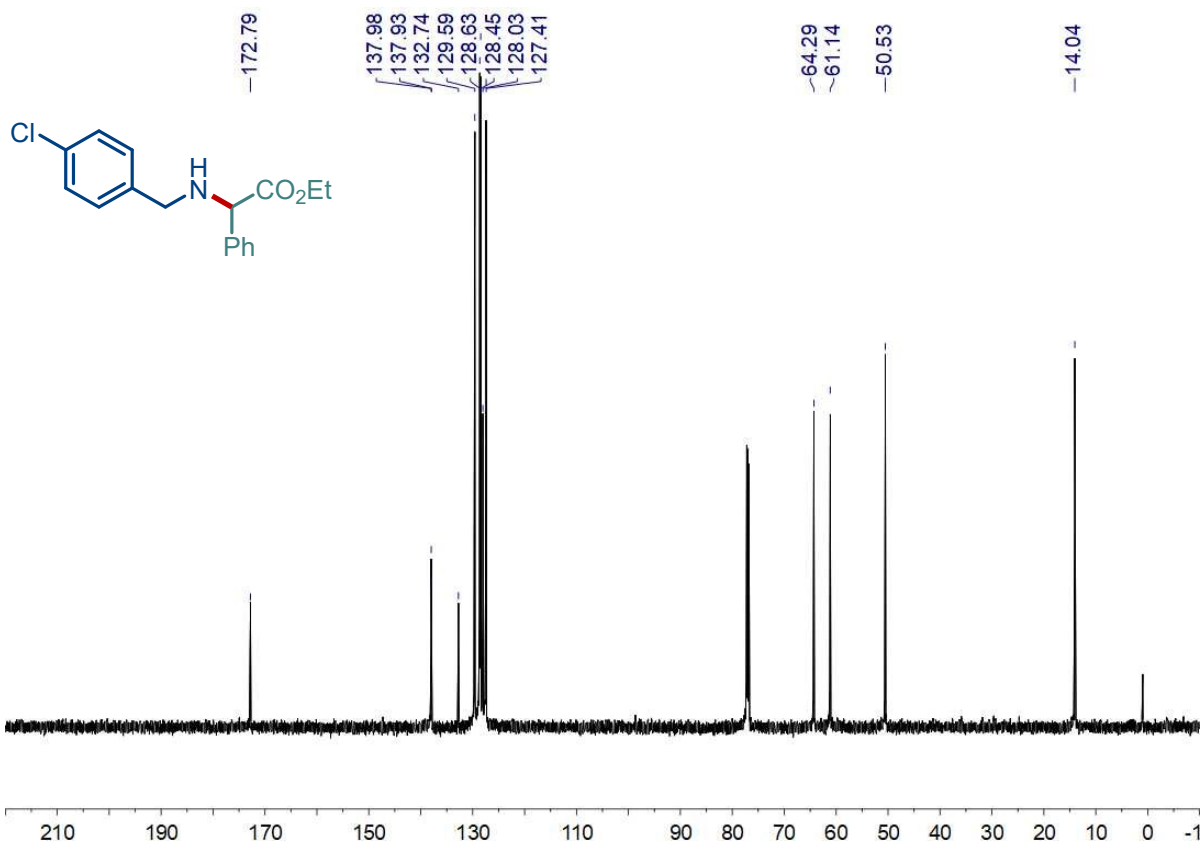

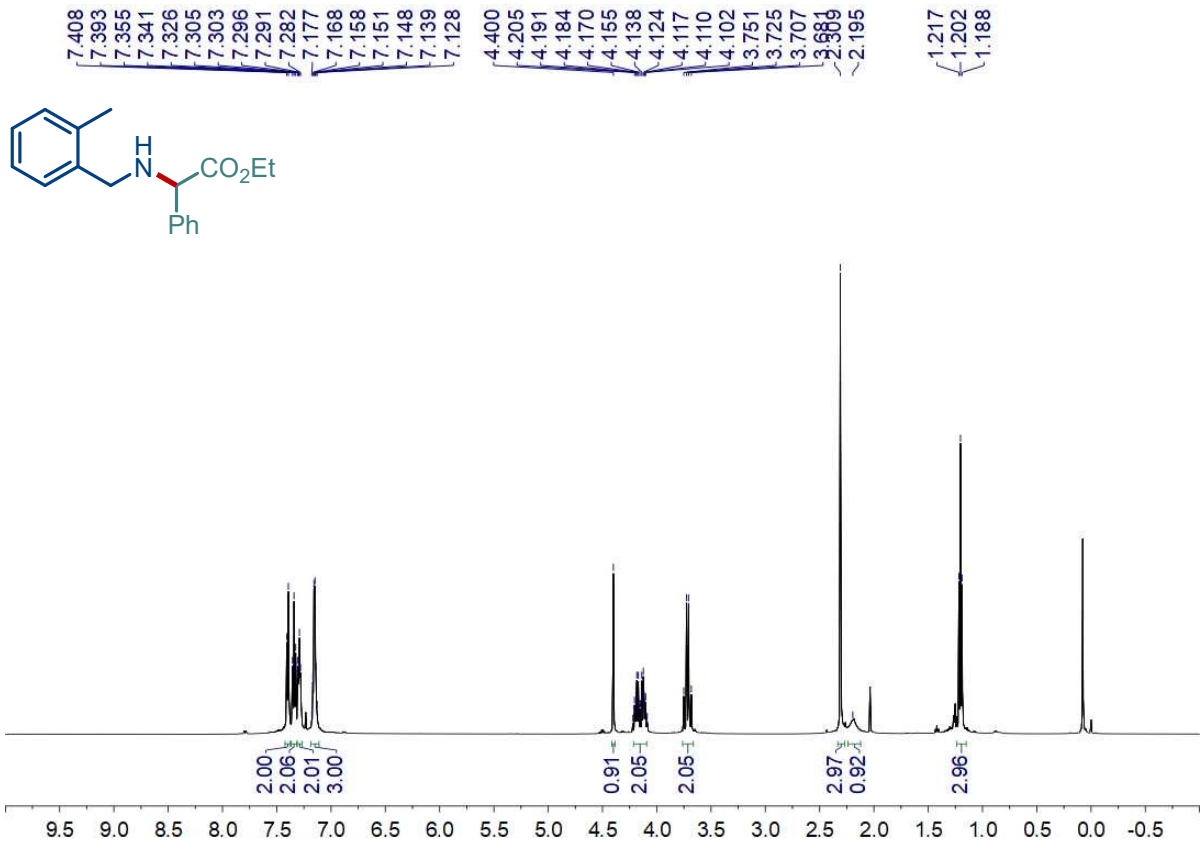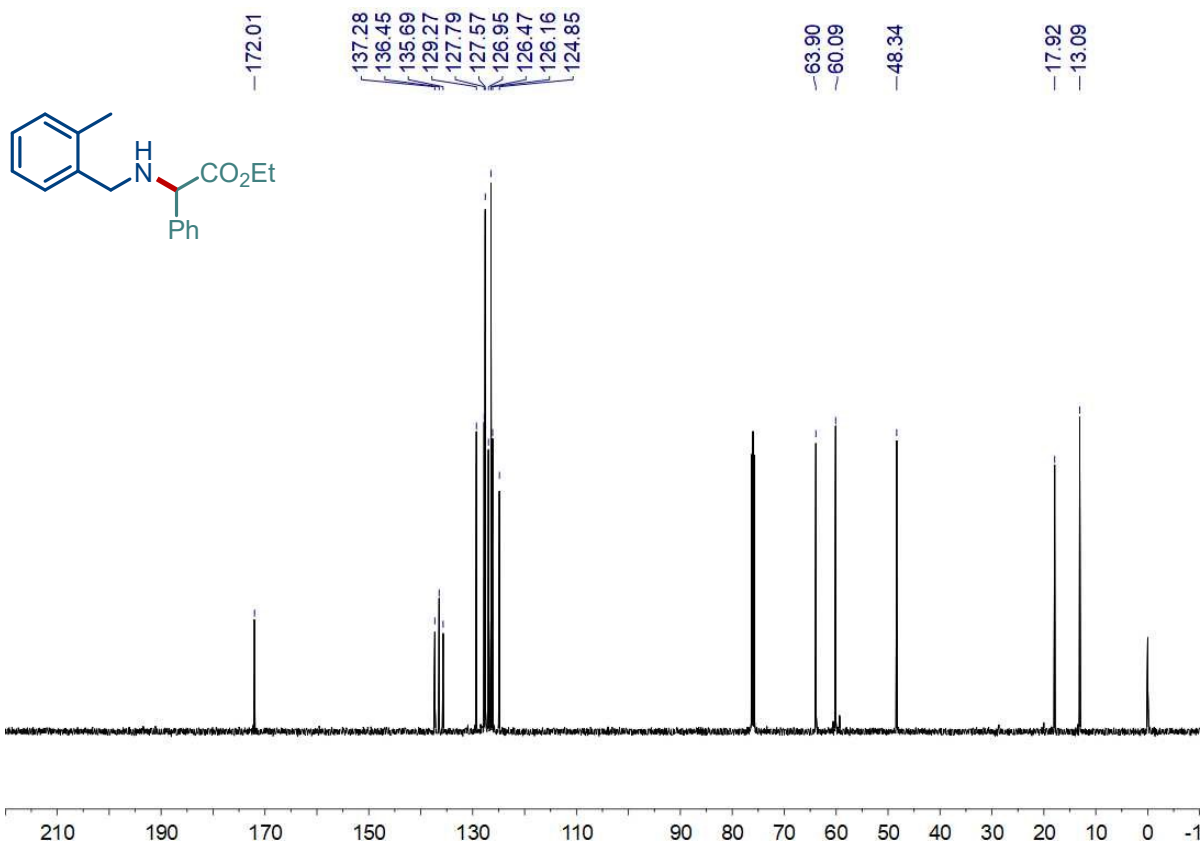

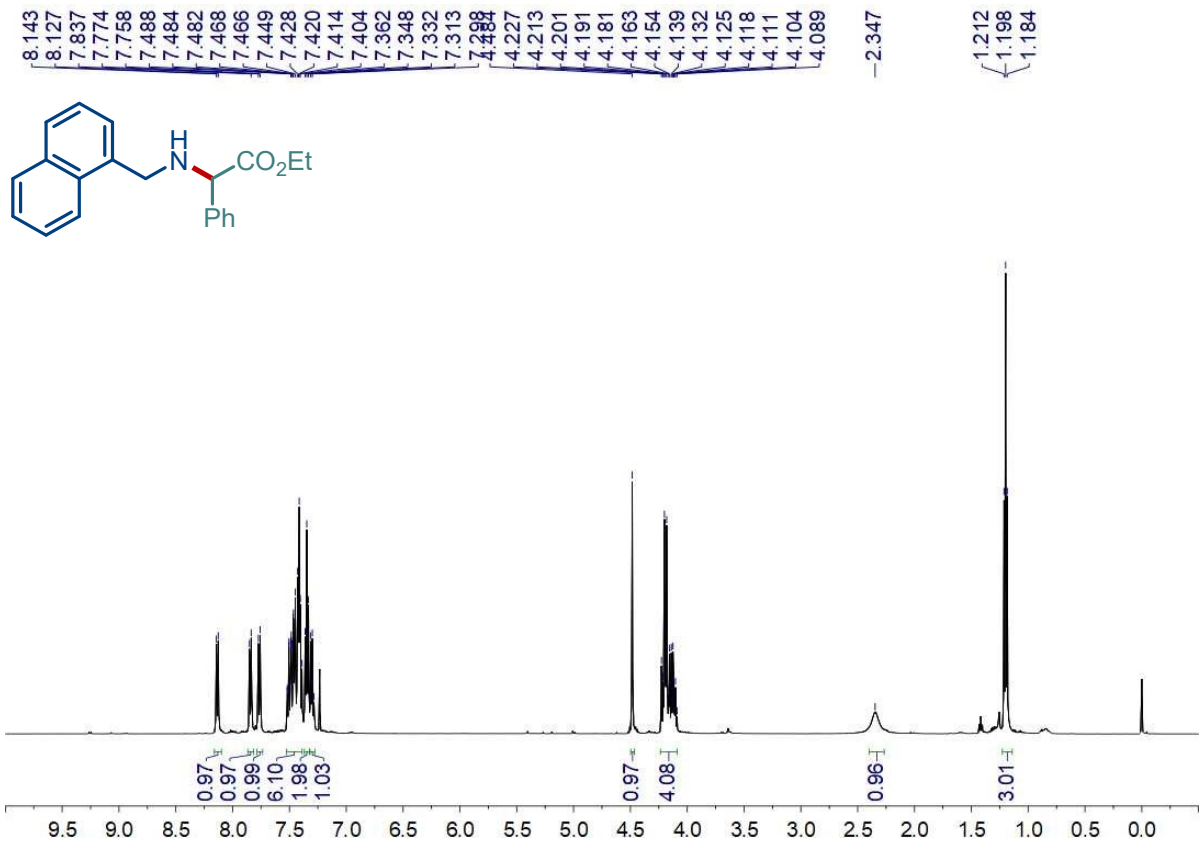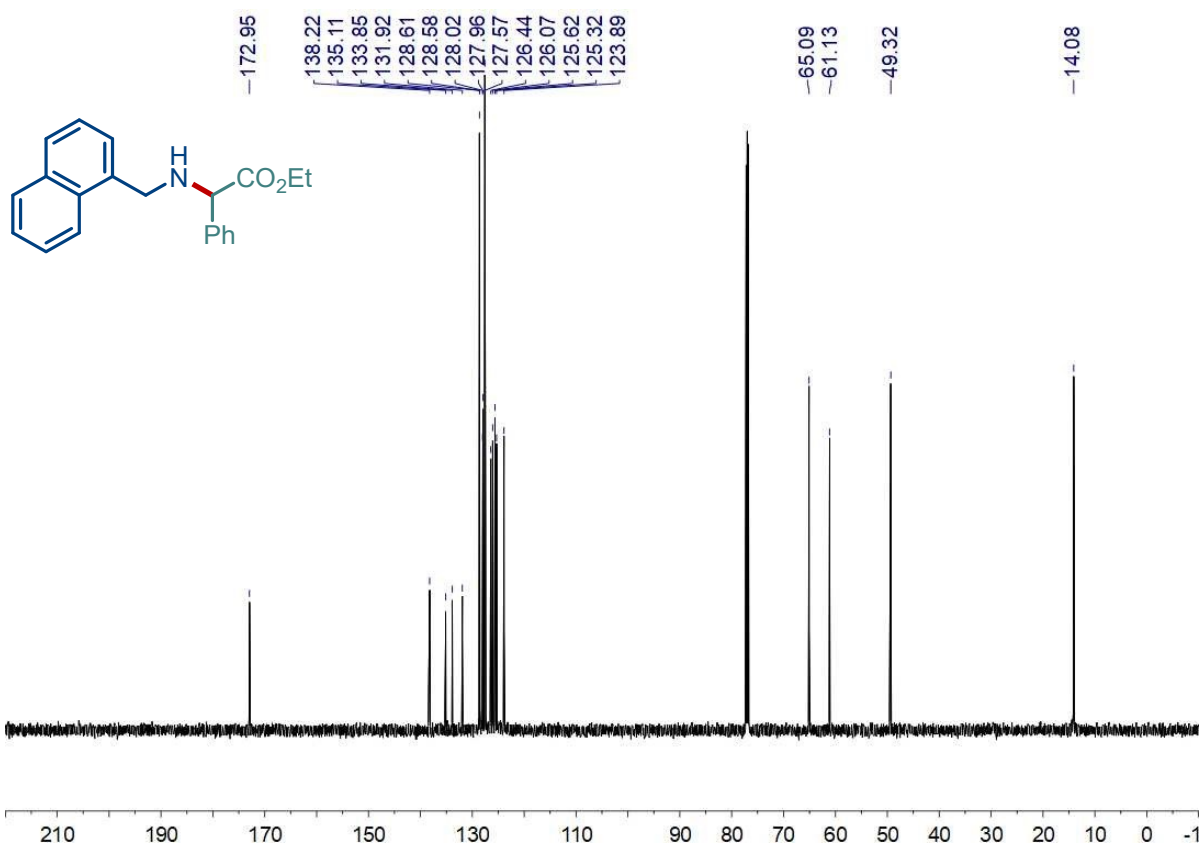

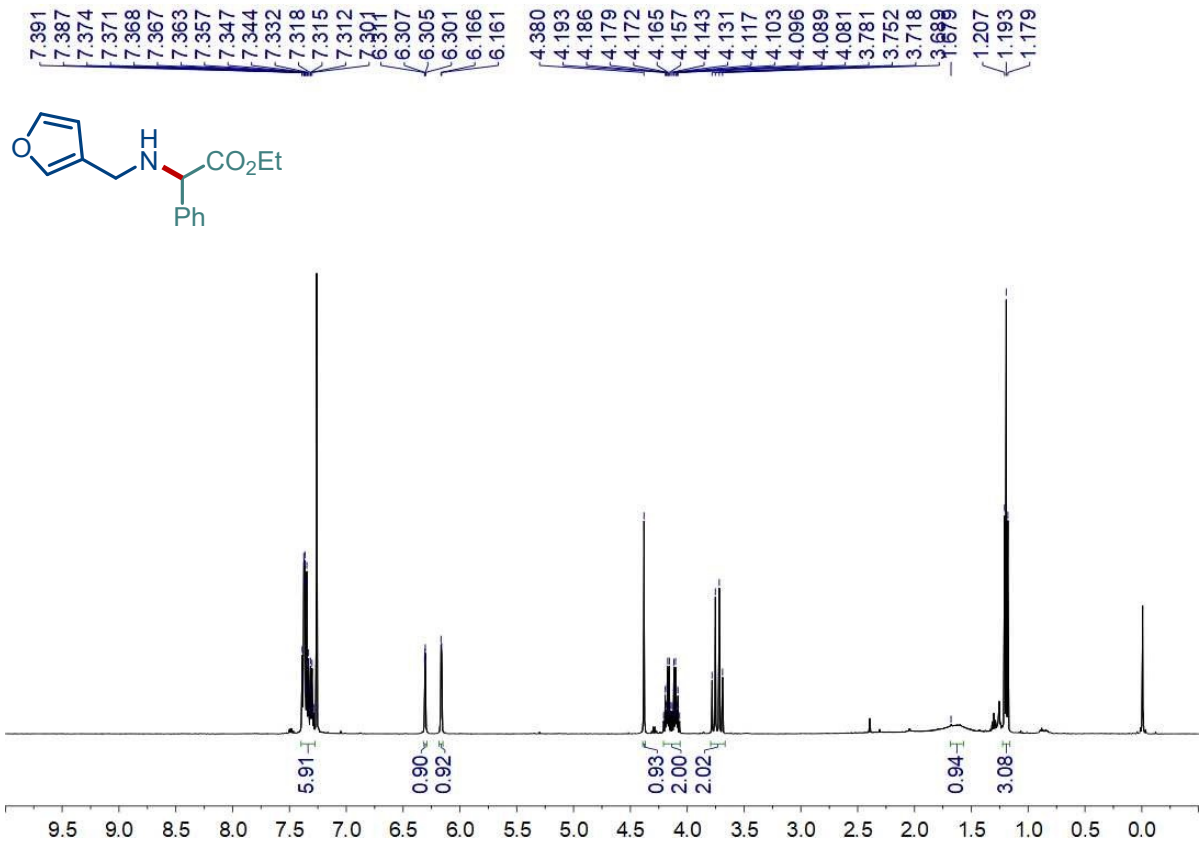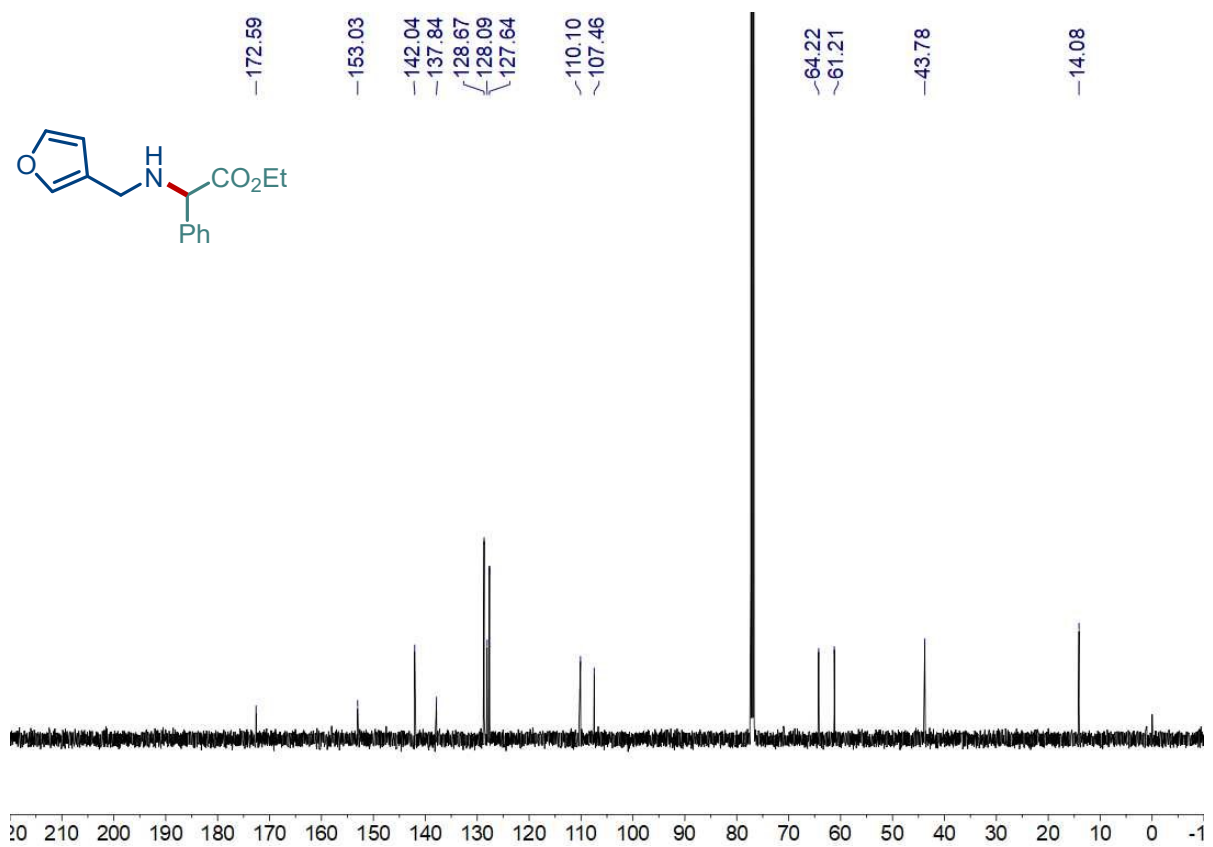

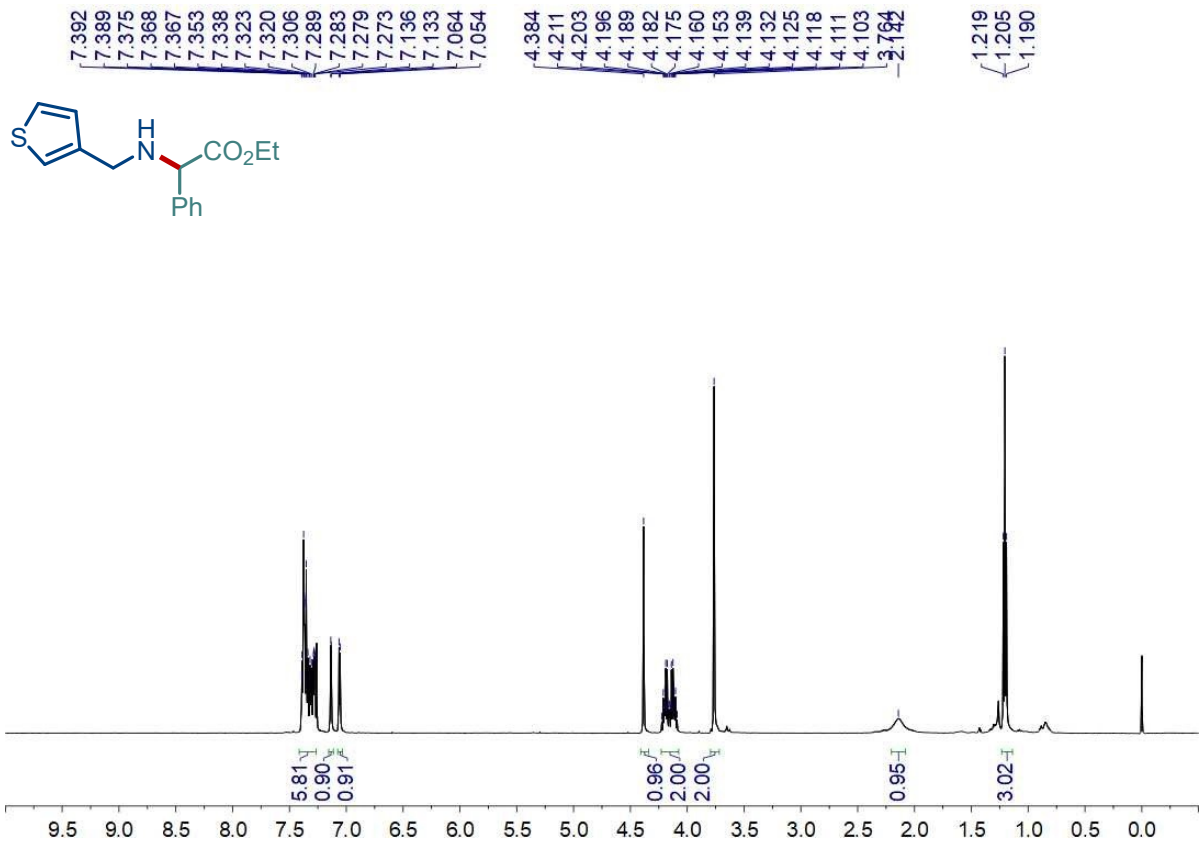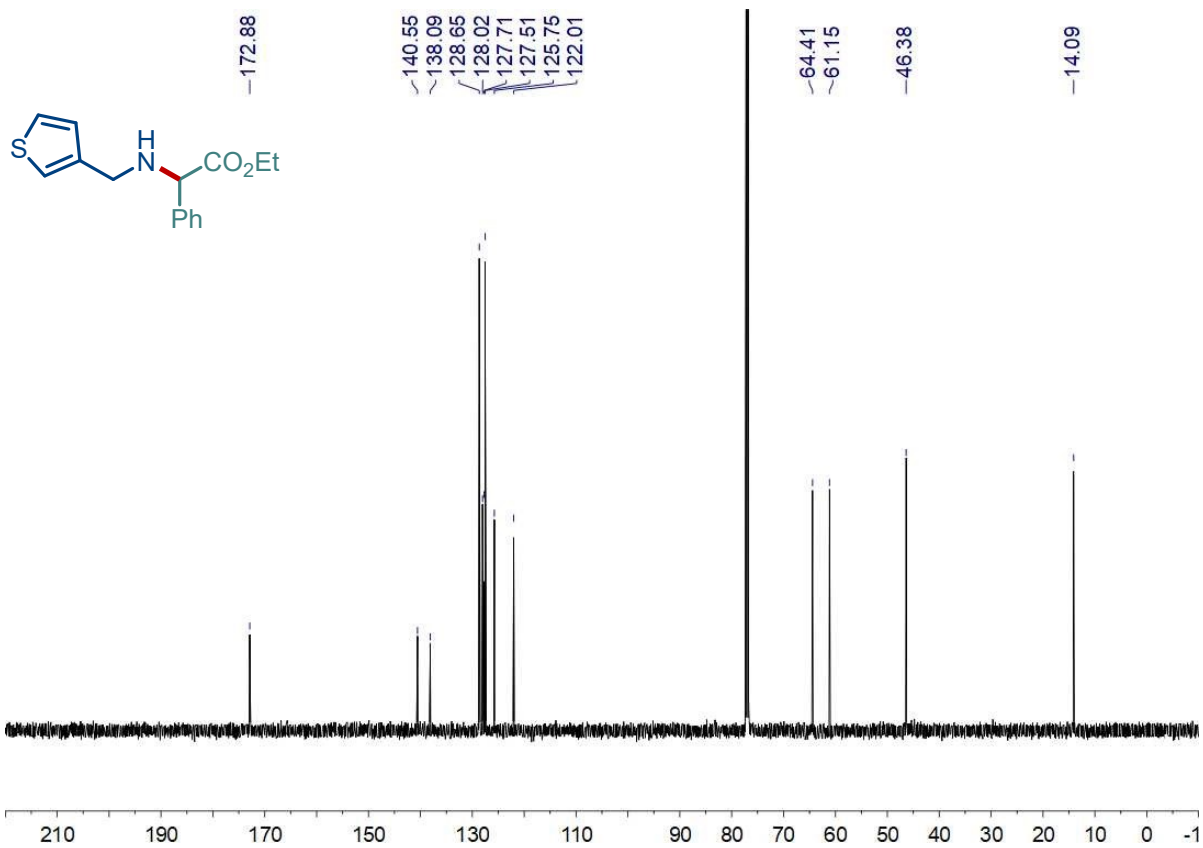

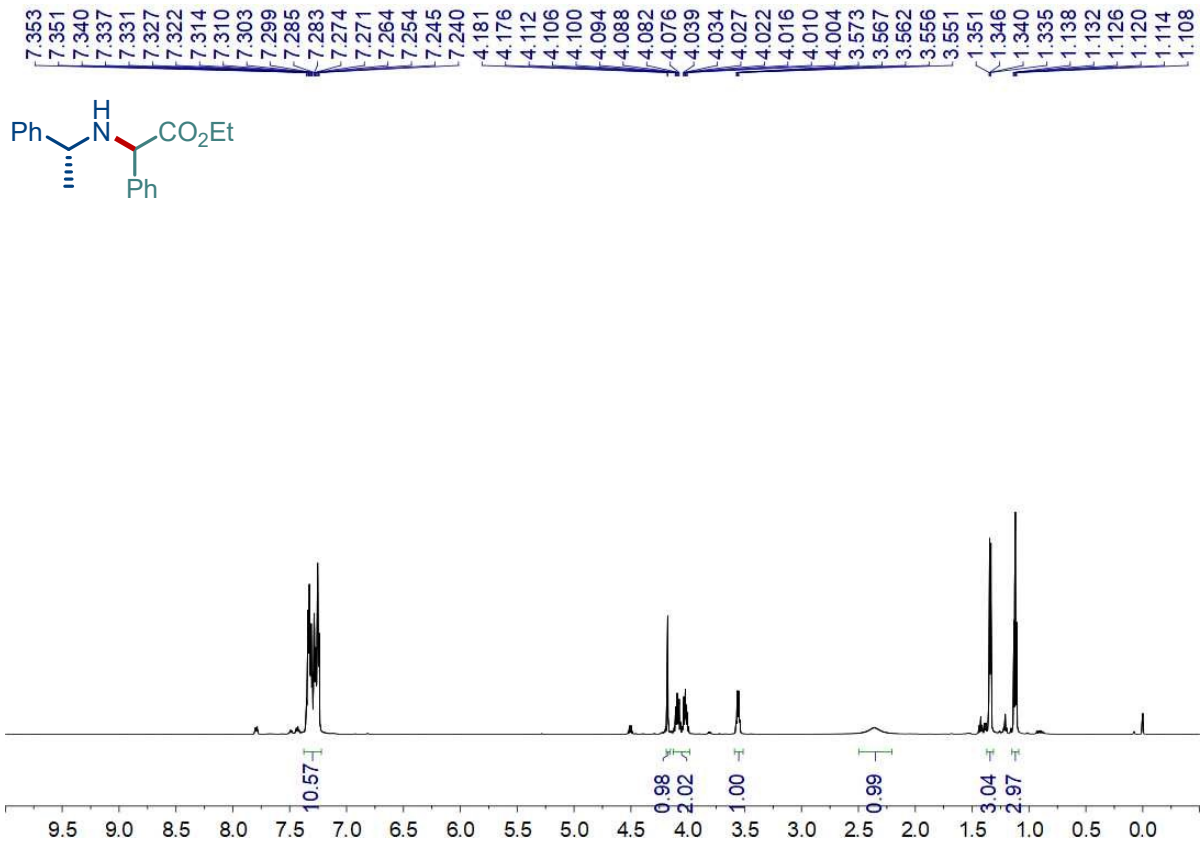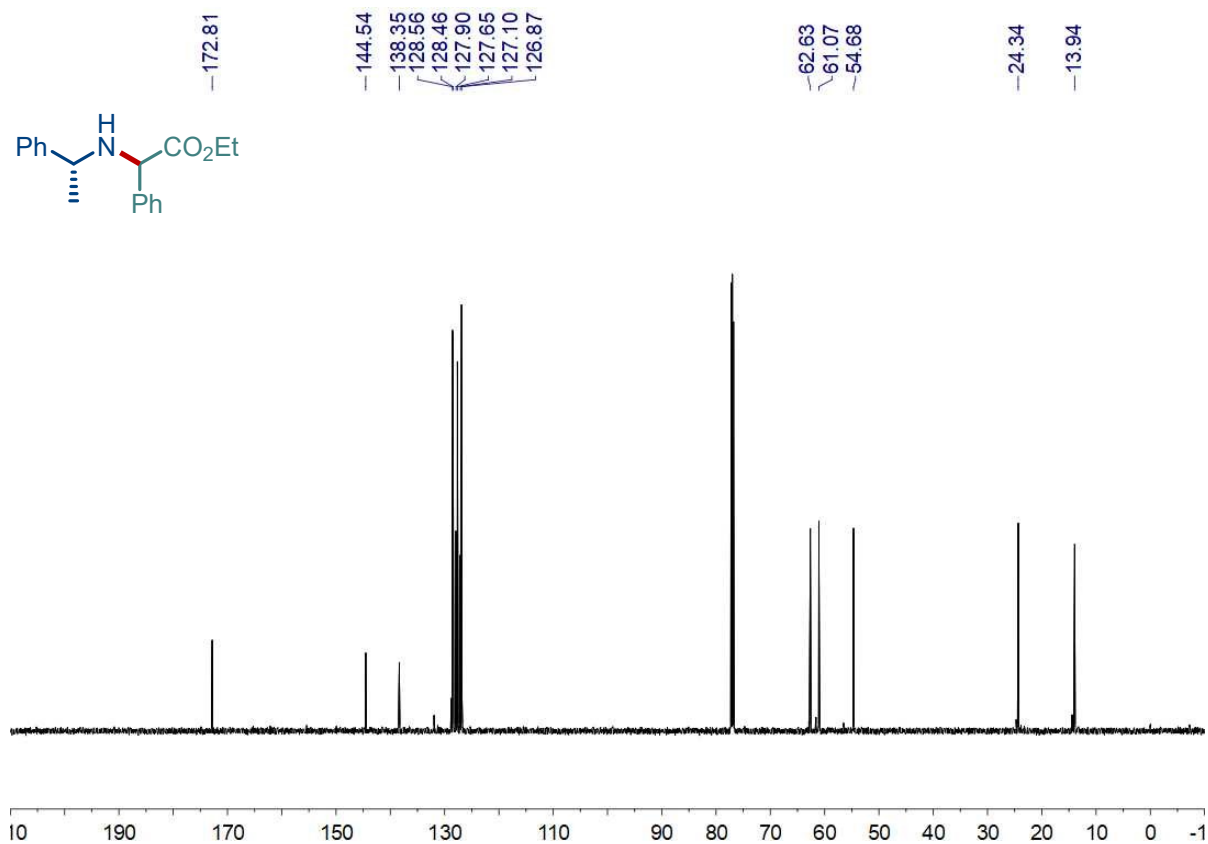

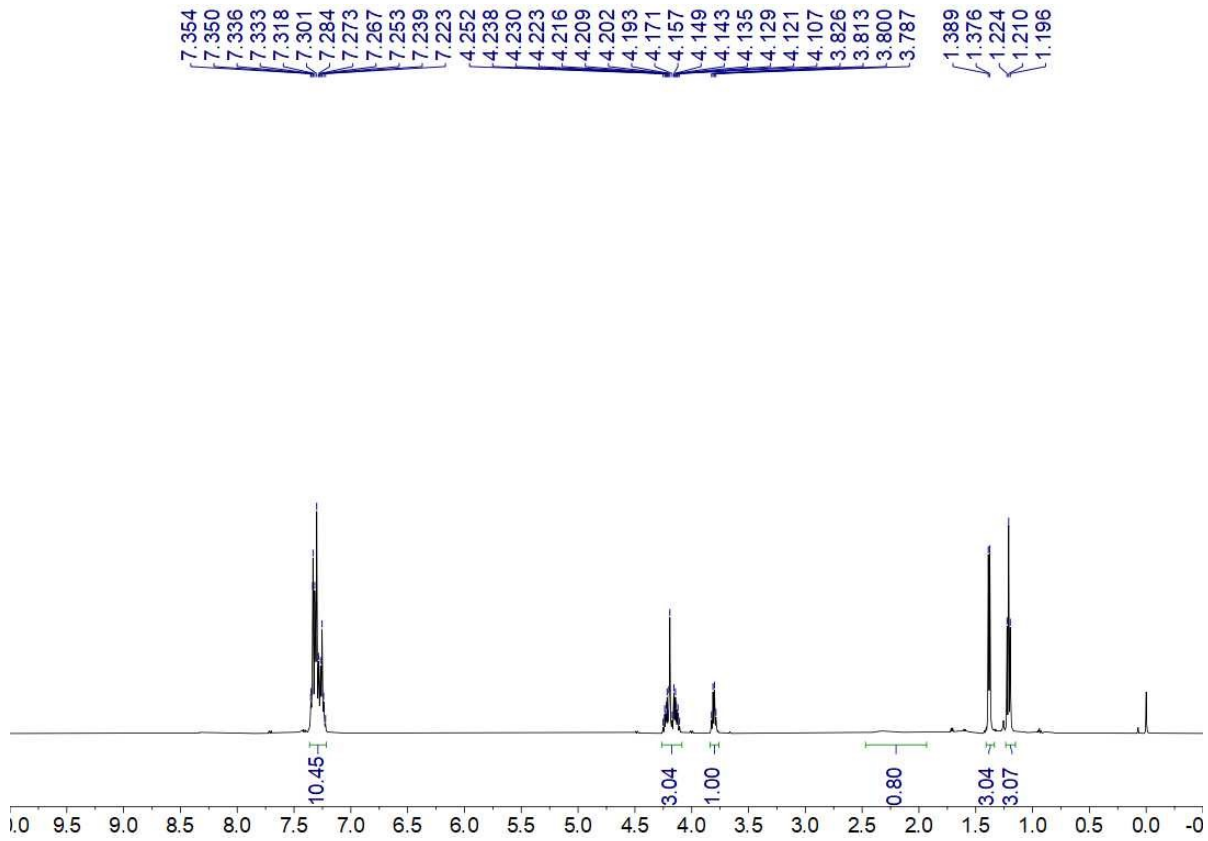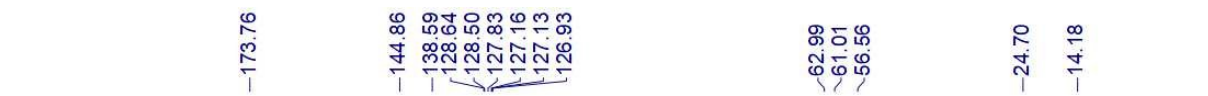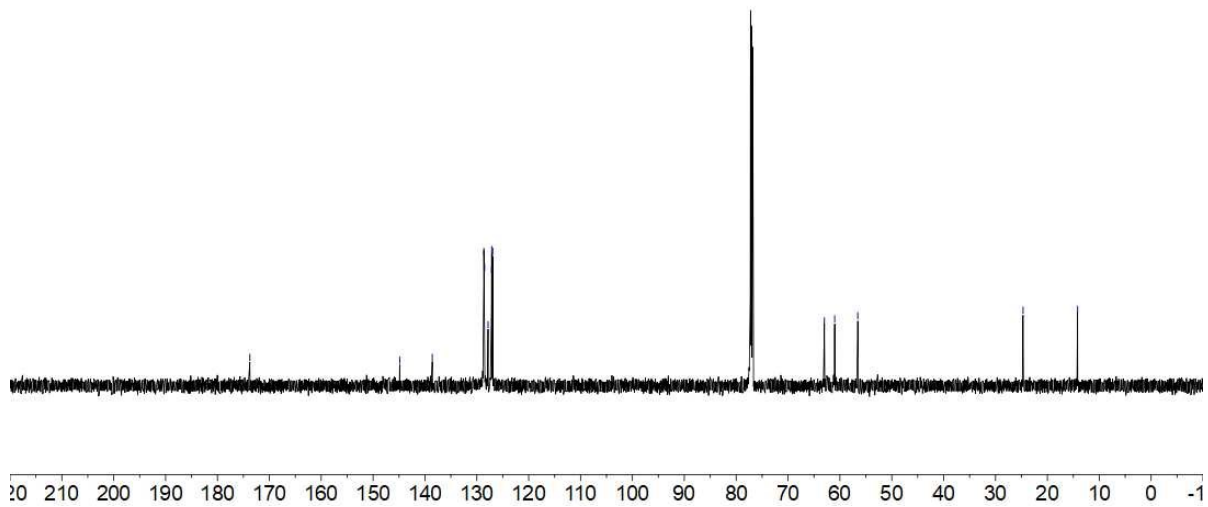

7.403  
7.388  
7.366  
7.352  
7.343  
7.339  
7.328  
7.322  
7.316  
7.307  
7.300  
7.297  
7.292  
7.283  
7.277  
7.267  
7.244  
7.230  
7.221  
7.216  
7.211  
7.207  
7.202  
7.192  
-4.741  
4.307  
4.218  
4.204  
4.196  
4.189  
4.182  
4.175  
4.168  
4.153  
4.151  
4.137  
4.129  
4.122  
4.115  
4.108  
4.101  
4.087  
1.197  
1.183  
1.169

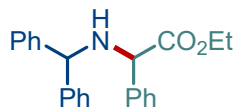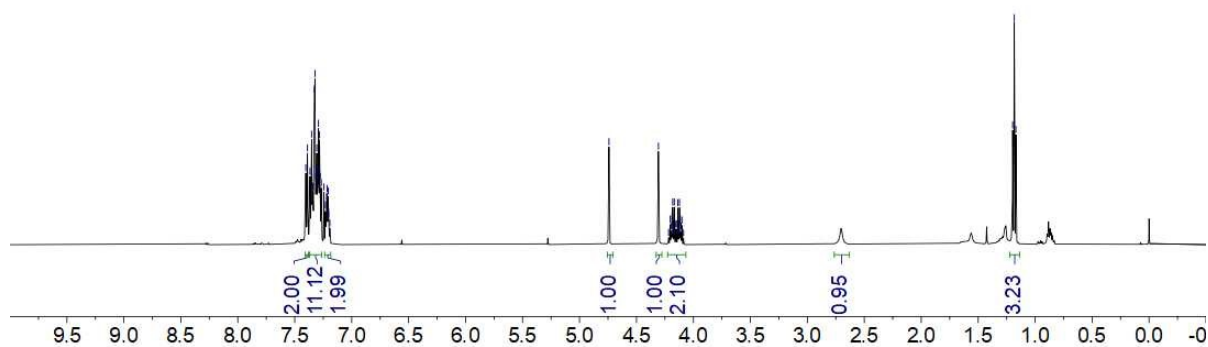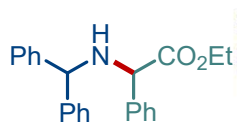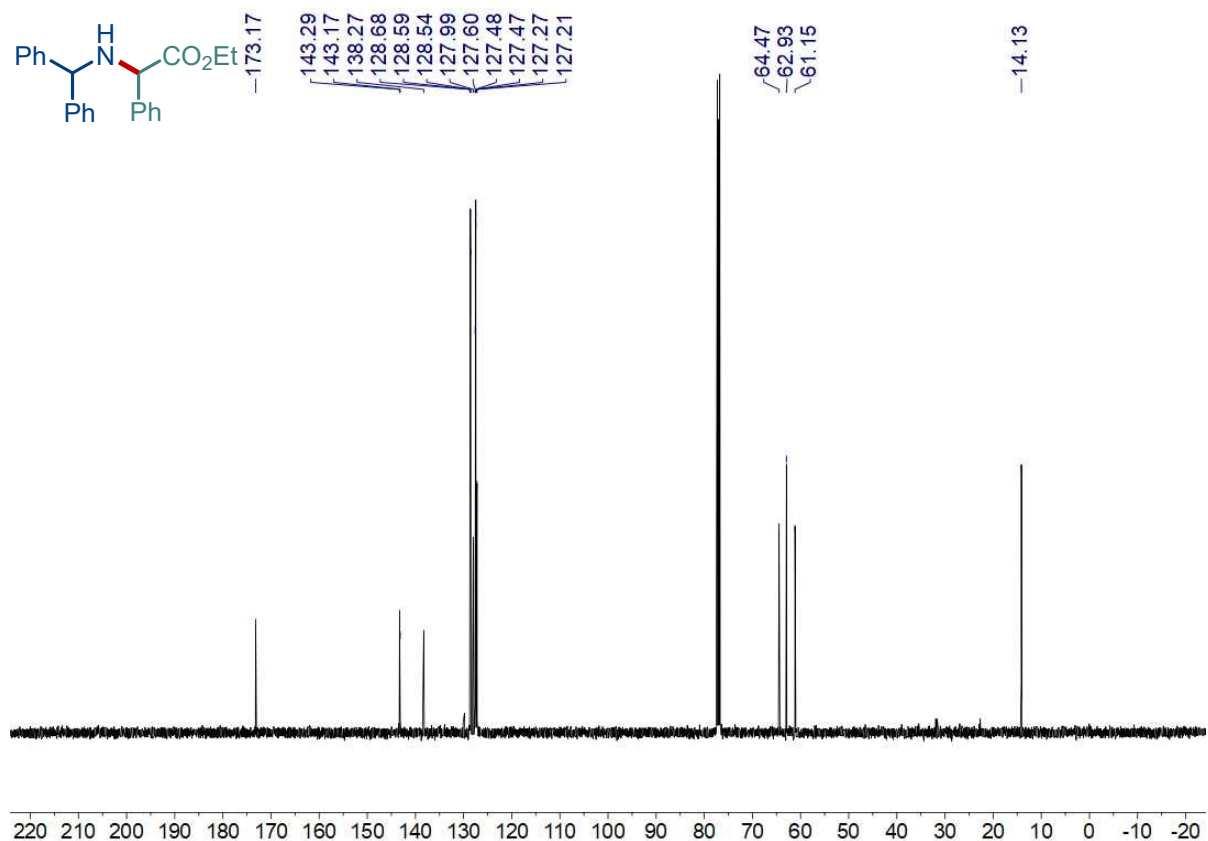



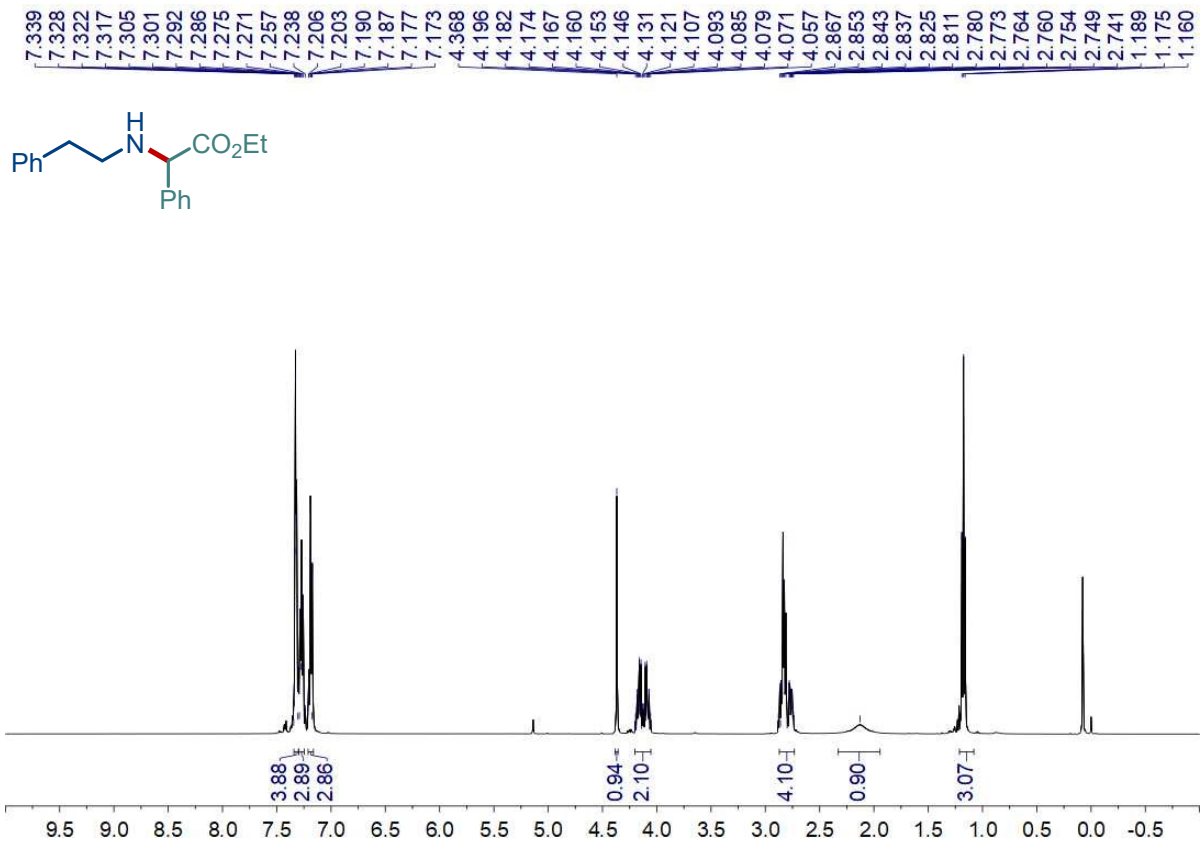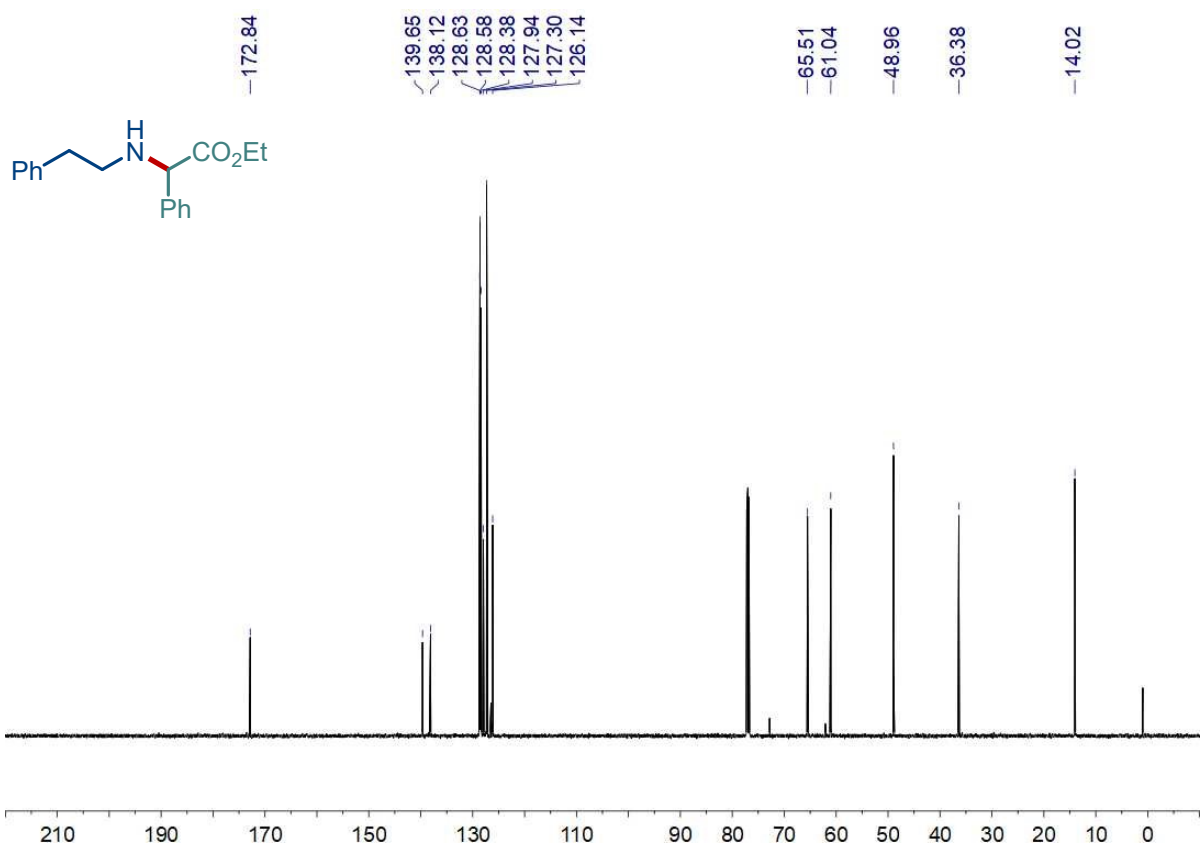

3v

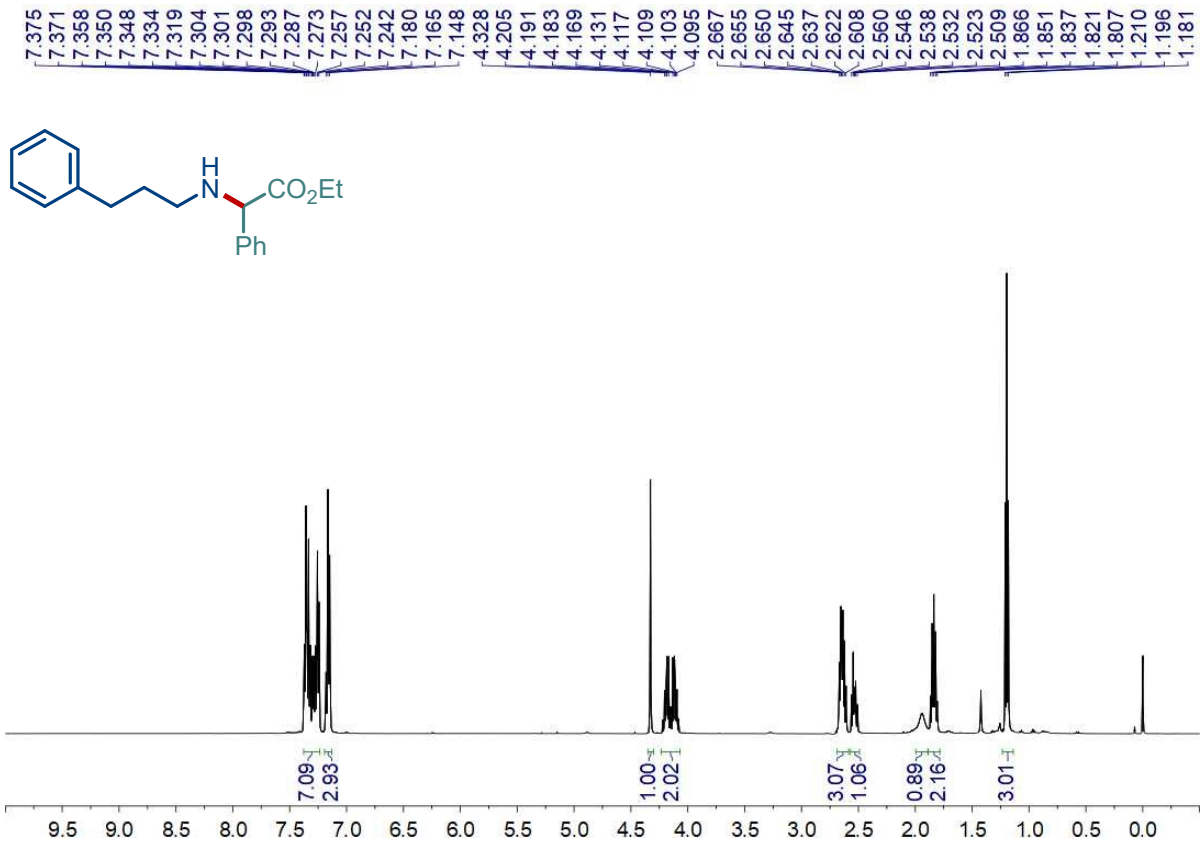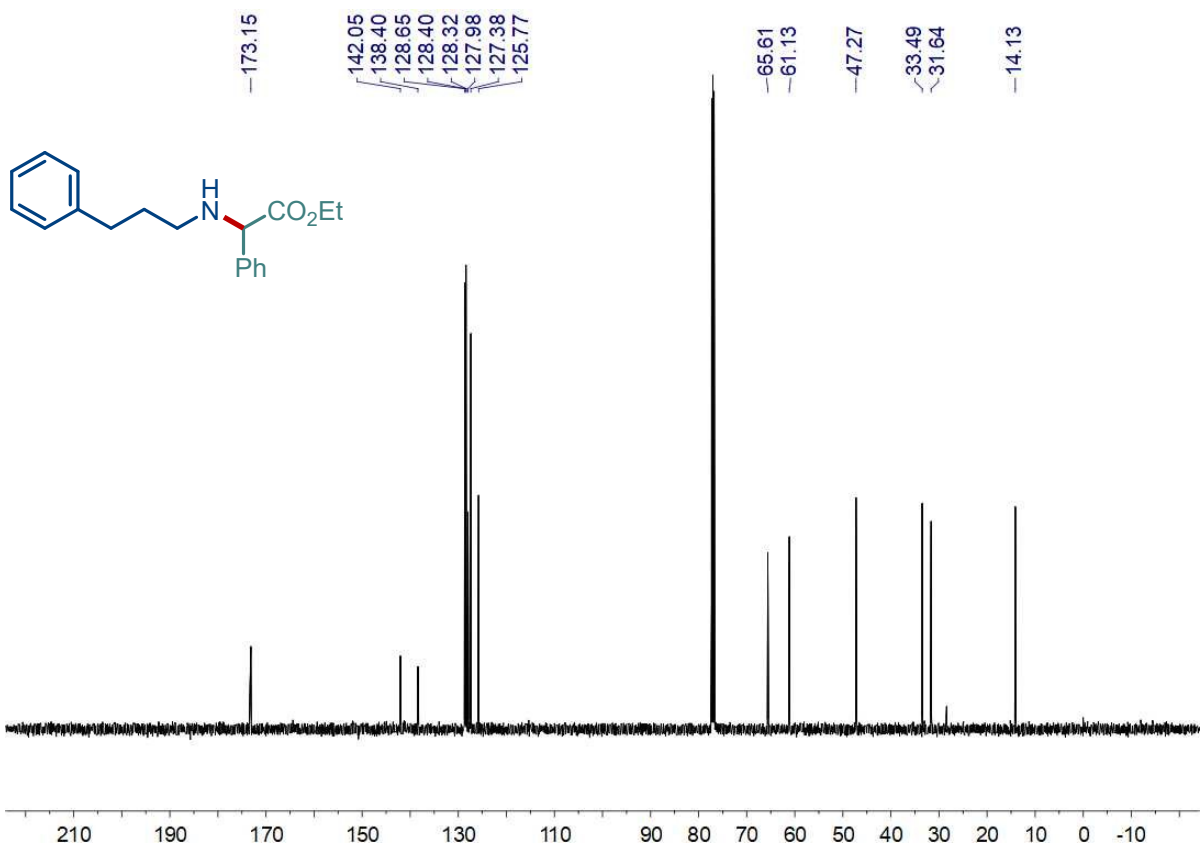

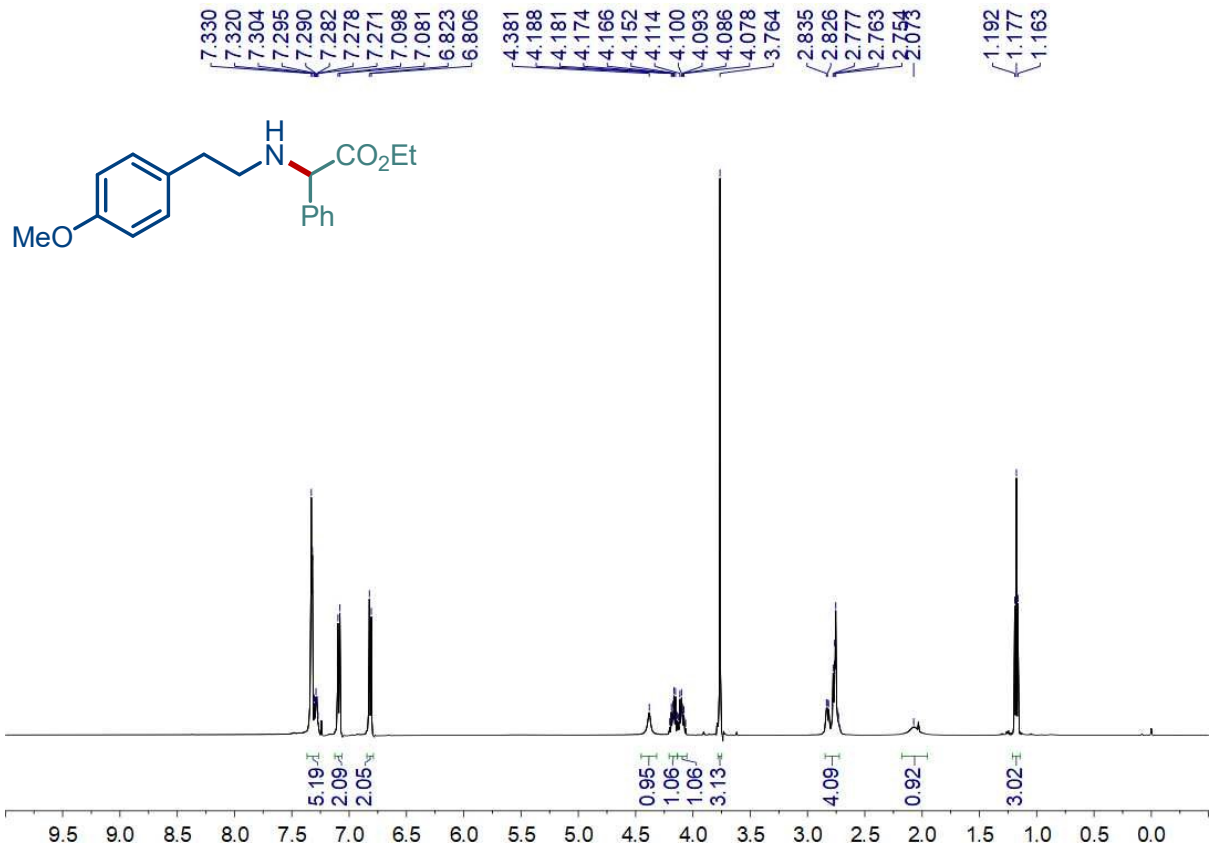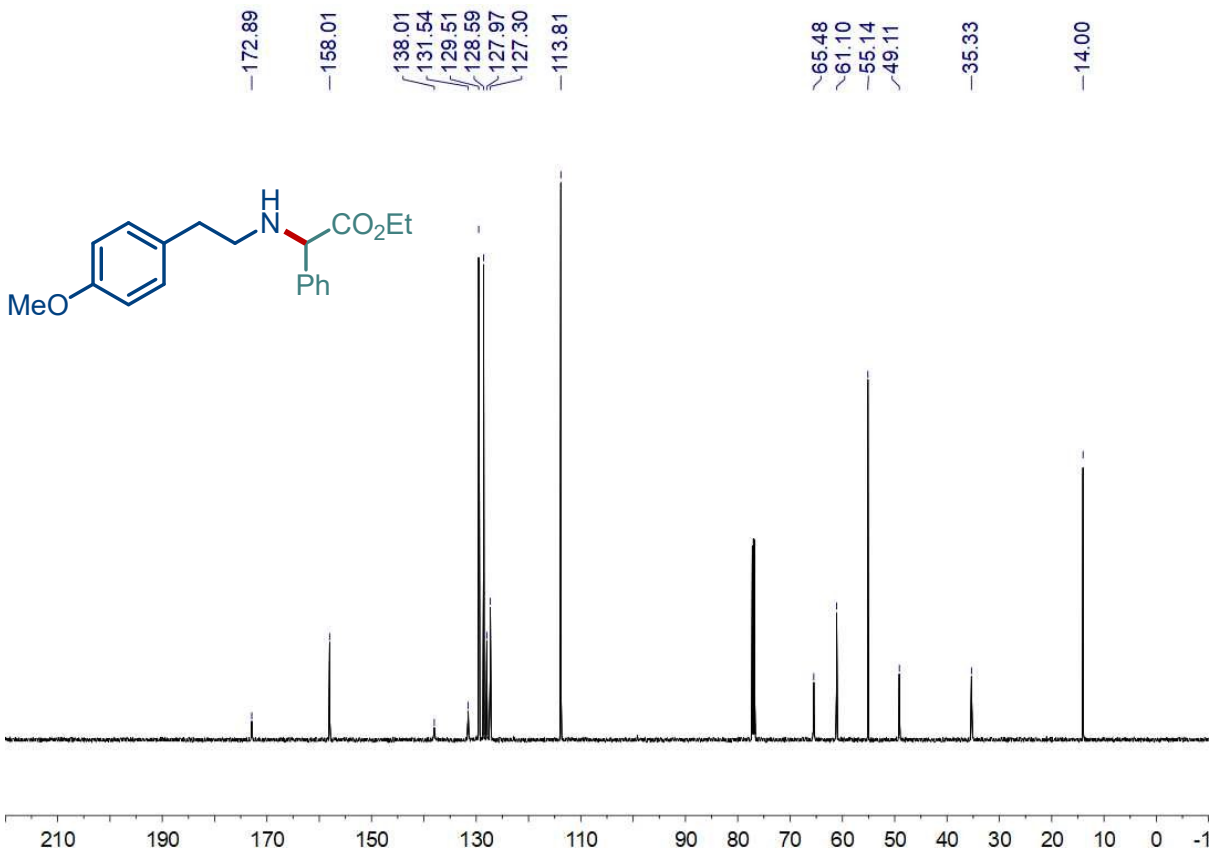

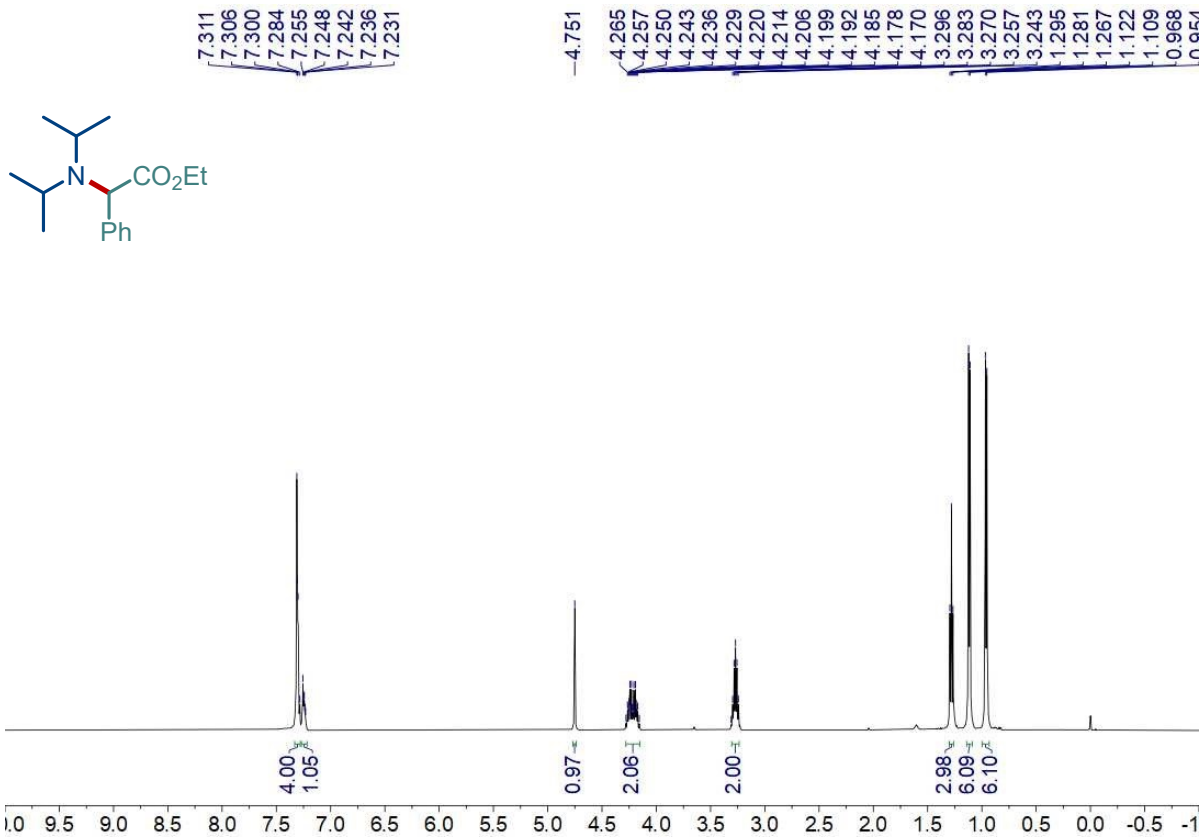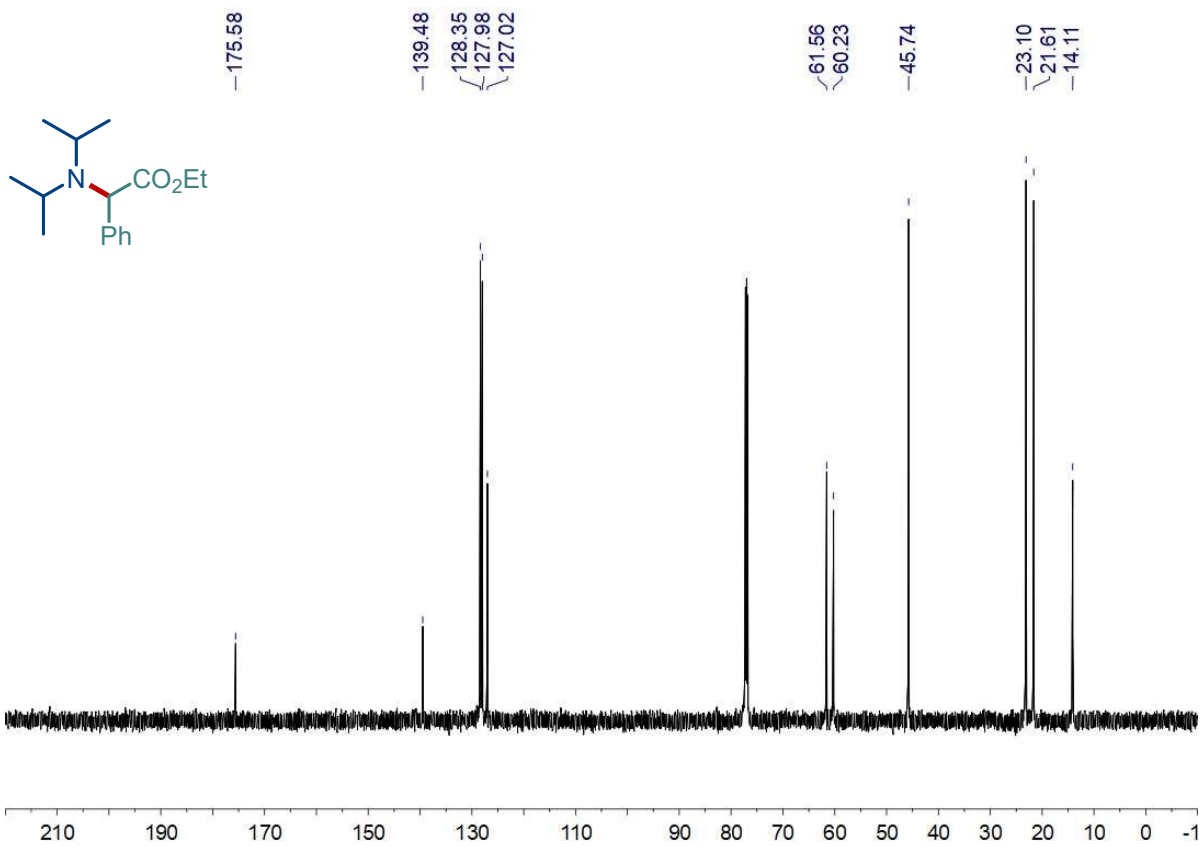

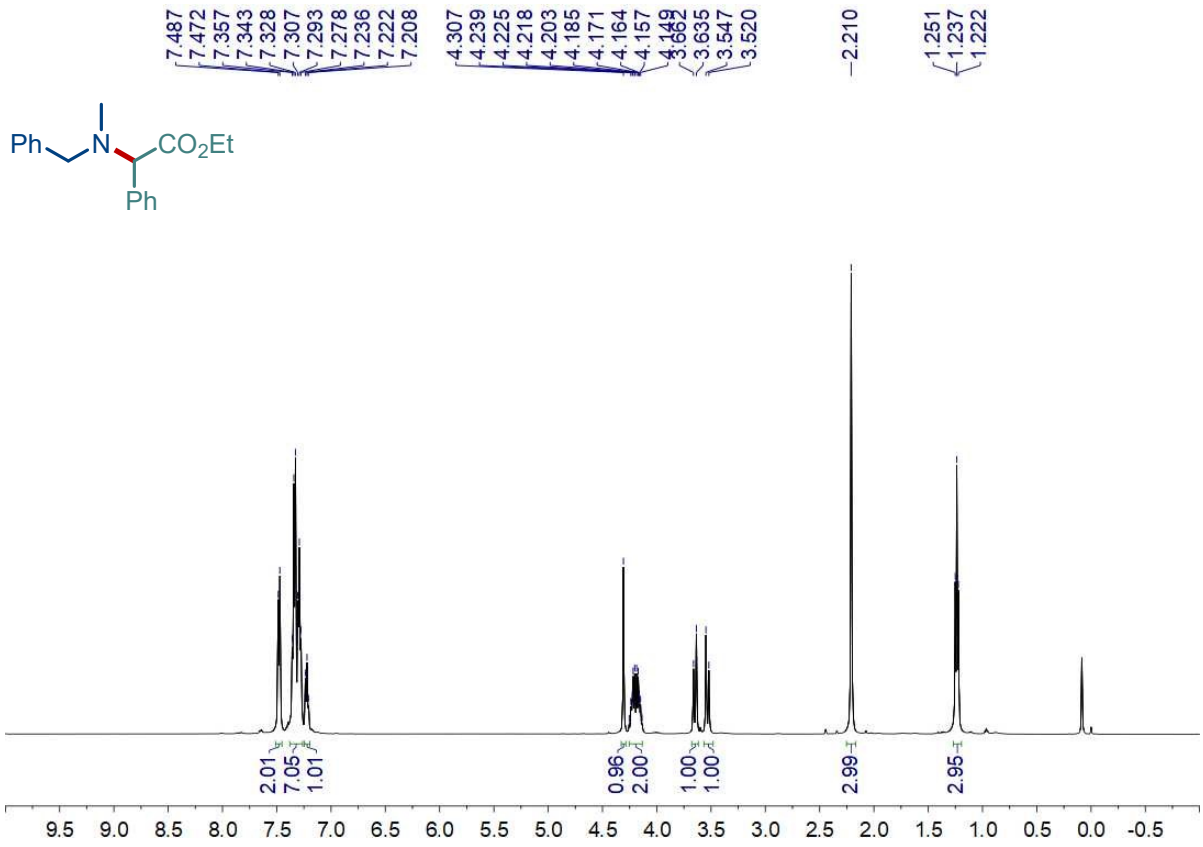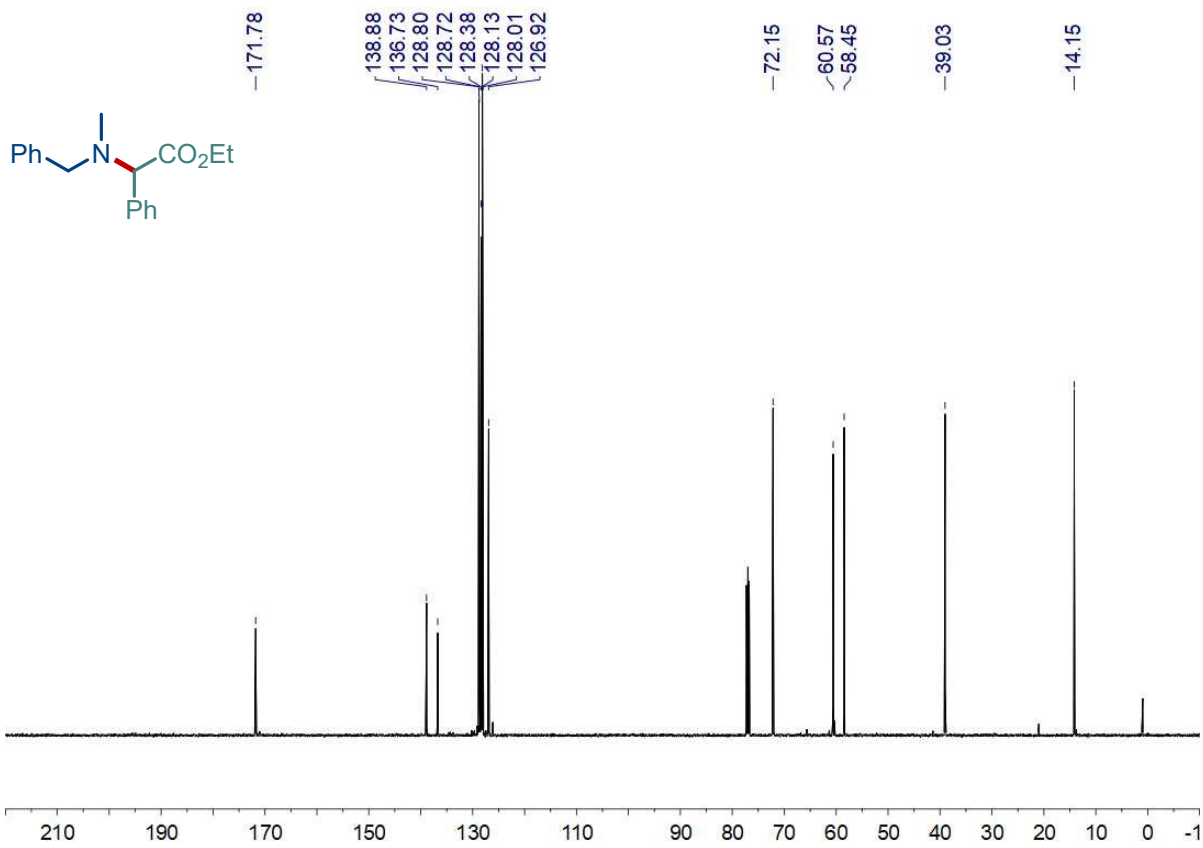

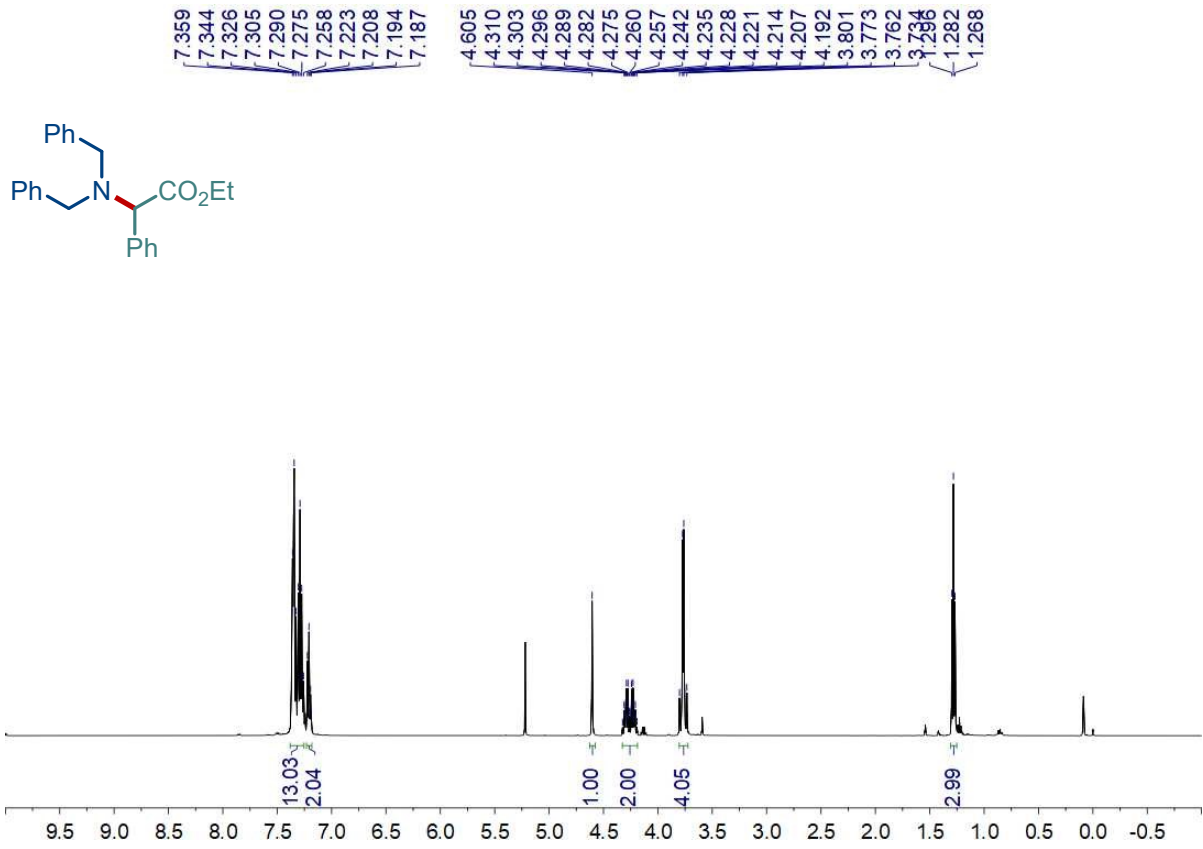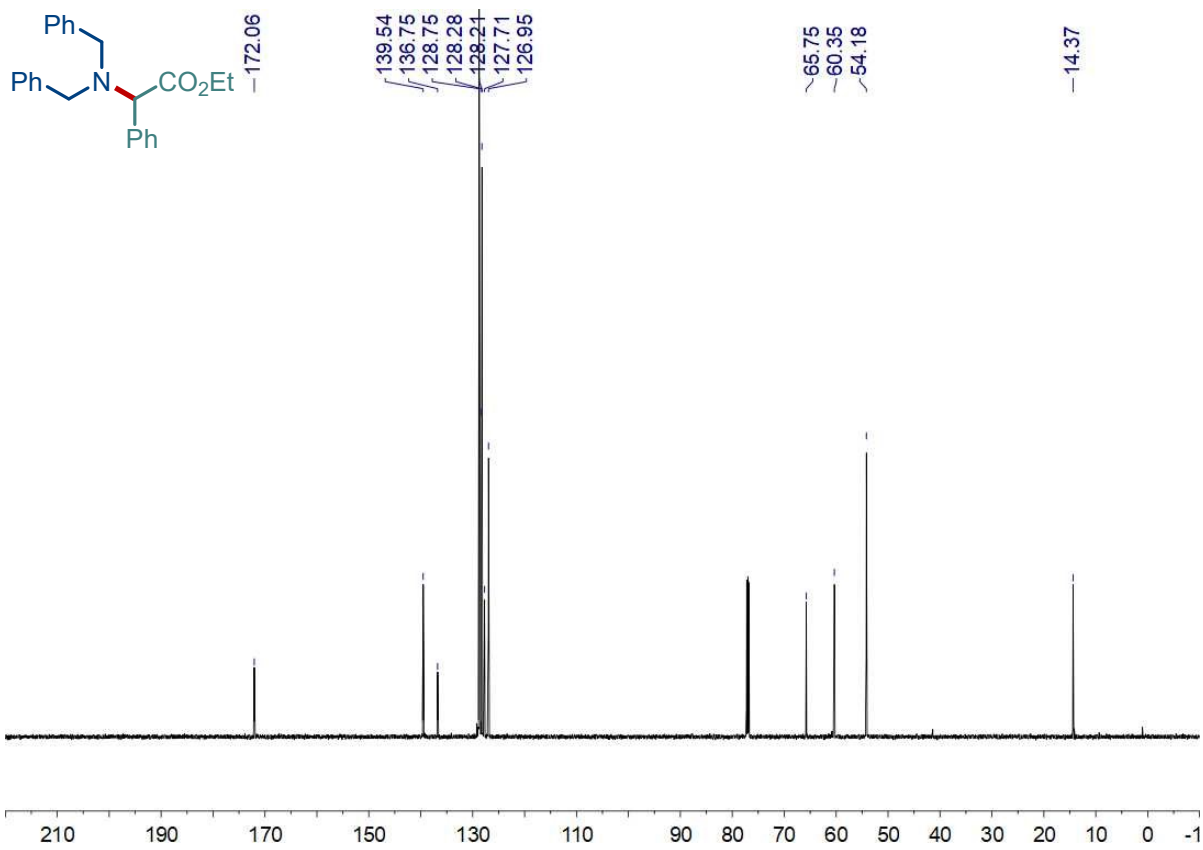

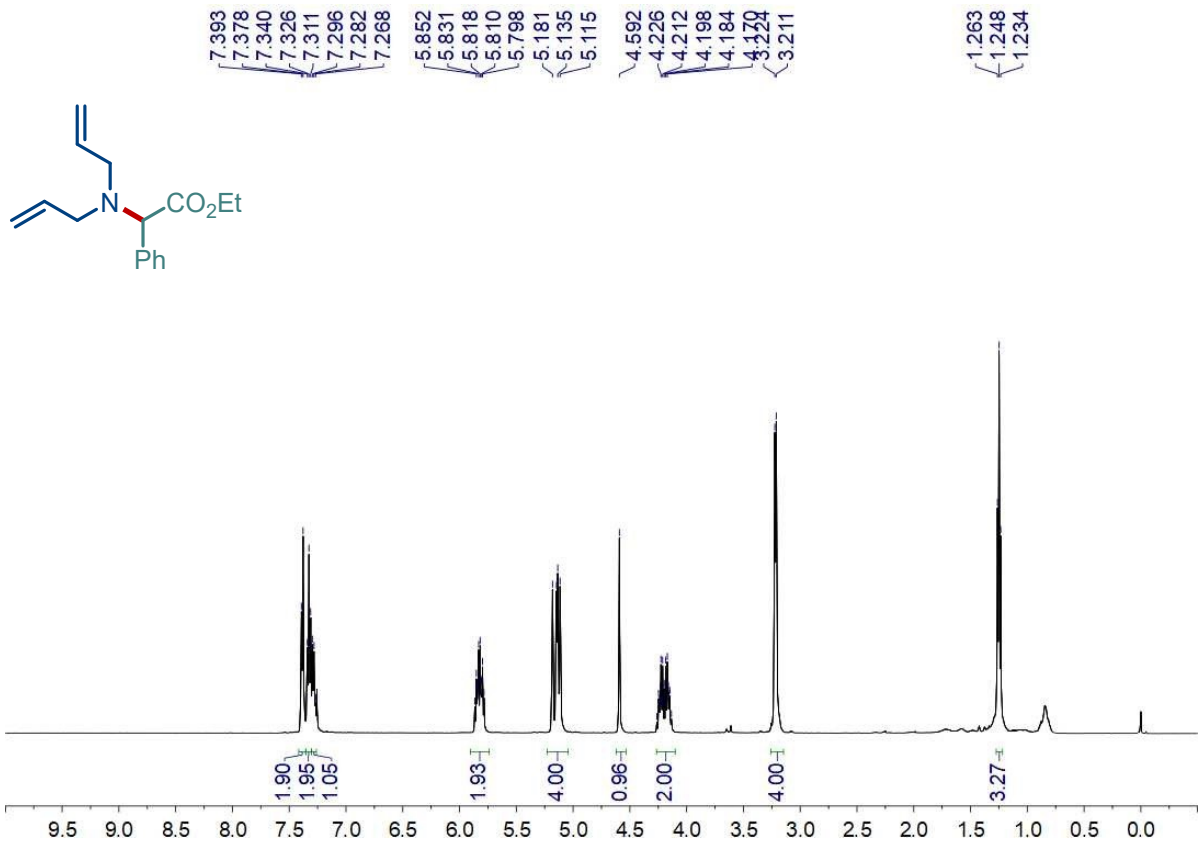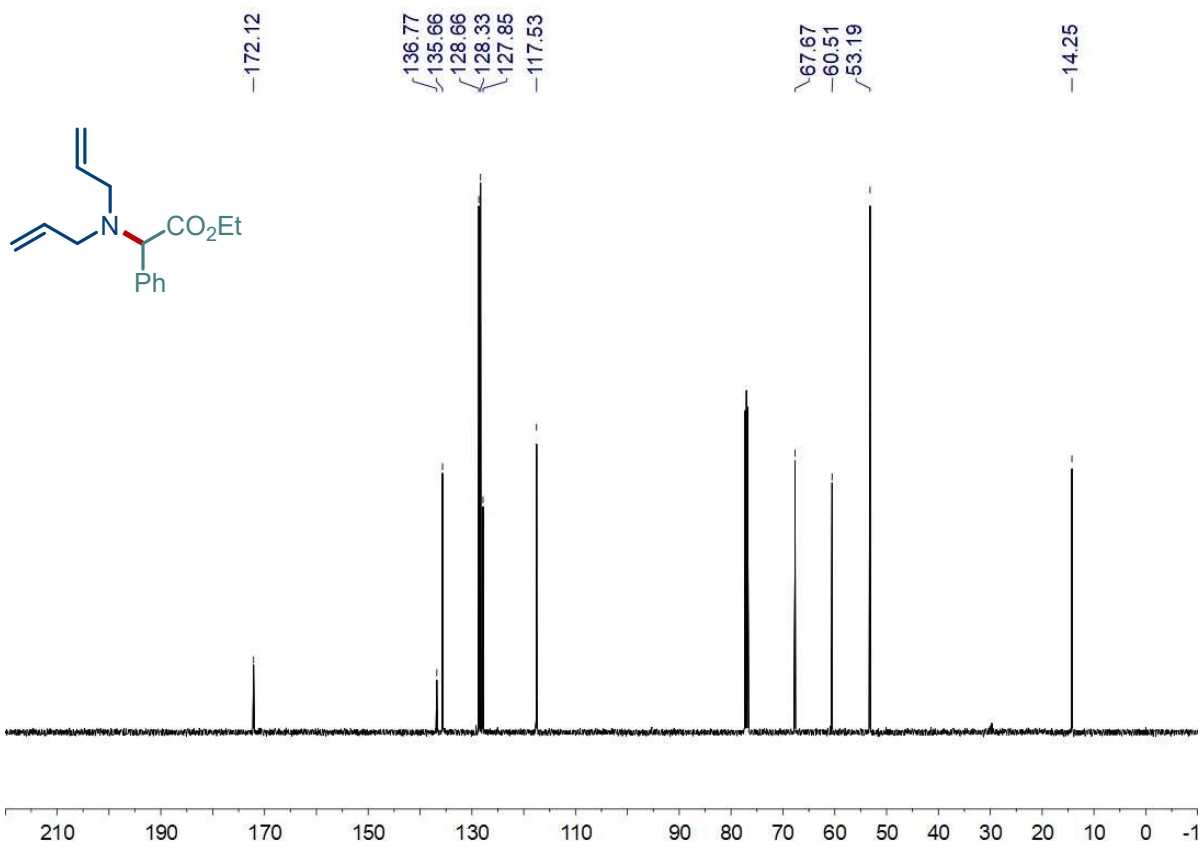

7.432  
7.418  
7.350  
7.346  
7.343  
7.333  
7.318  
7.312  
7.305  
7.299  
4.203  
4.189  
4.181  
4.167  
4.153  
4.139  
4.132  
4.124  
4.118  
4.110  
4.104  
4.095  
4.011  
2.909  
2.887  
2.772  
2.750  
2.292  
2.283  
2.274  
2.214  
2.208  
2.042  
2.012  
2.006  
1.877  
1.871  
1.864  
1.850  
1.842  
1.828  
1.821  
1.800  
1.792  
1.248  
1.233  
1.219  
1.217  
1.203  
1.188

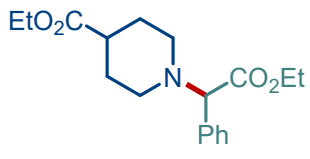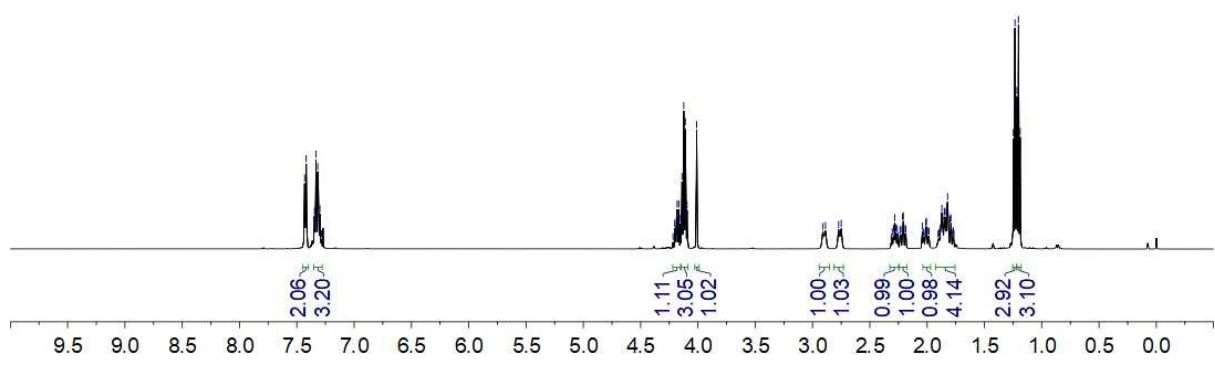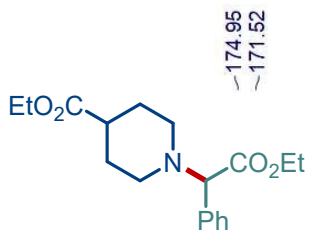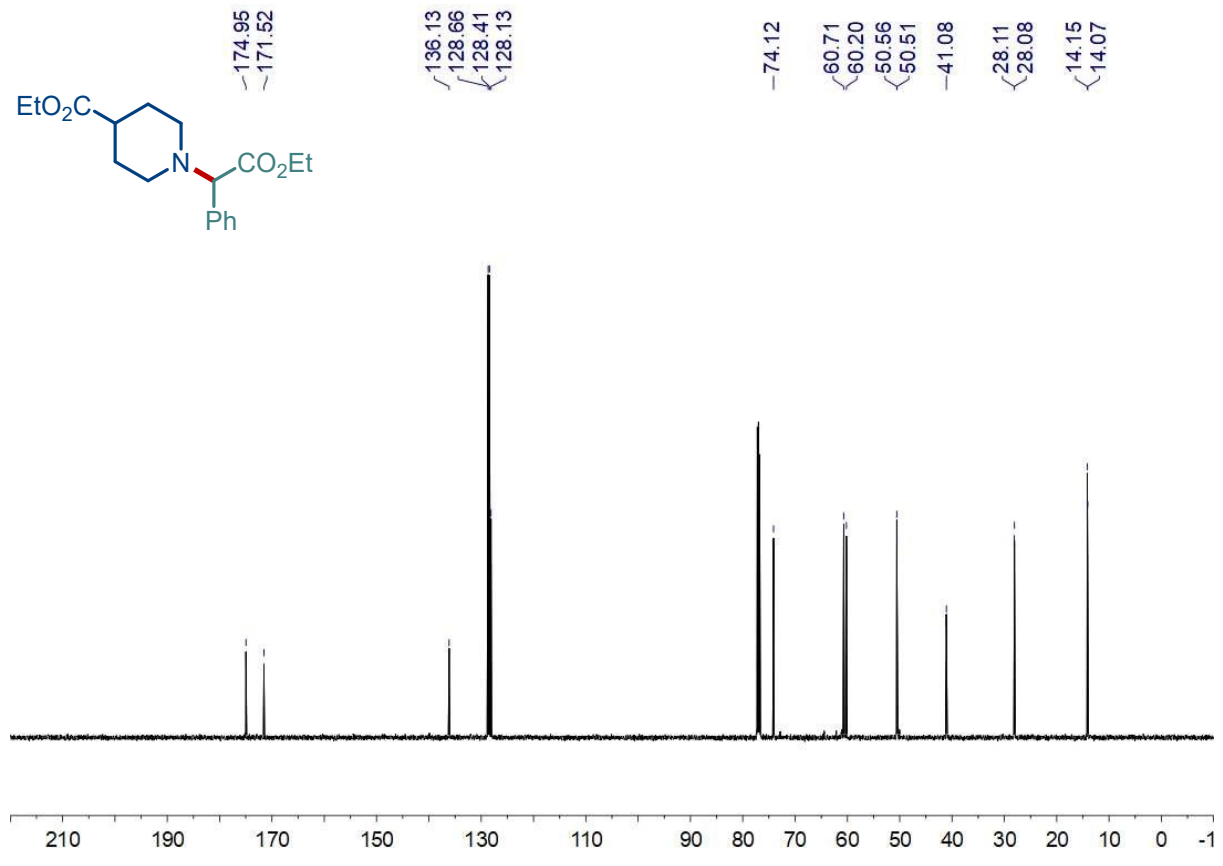



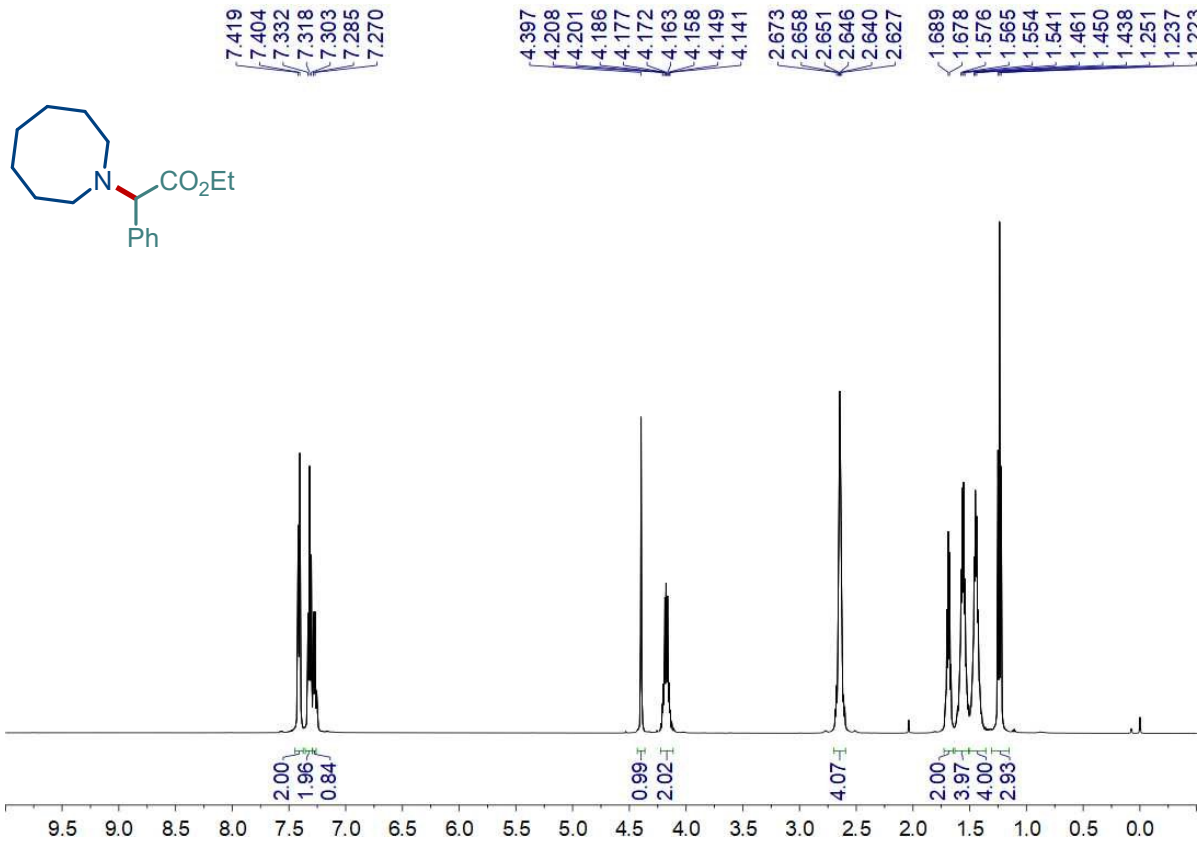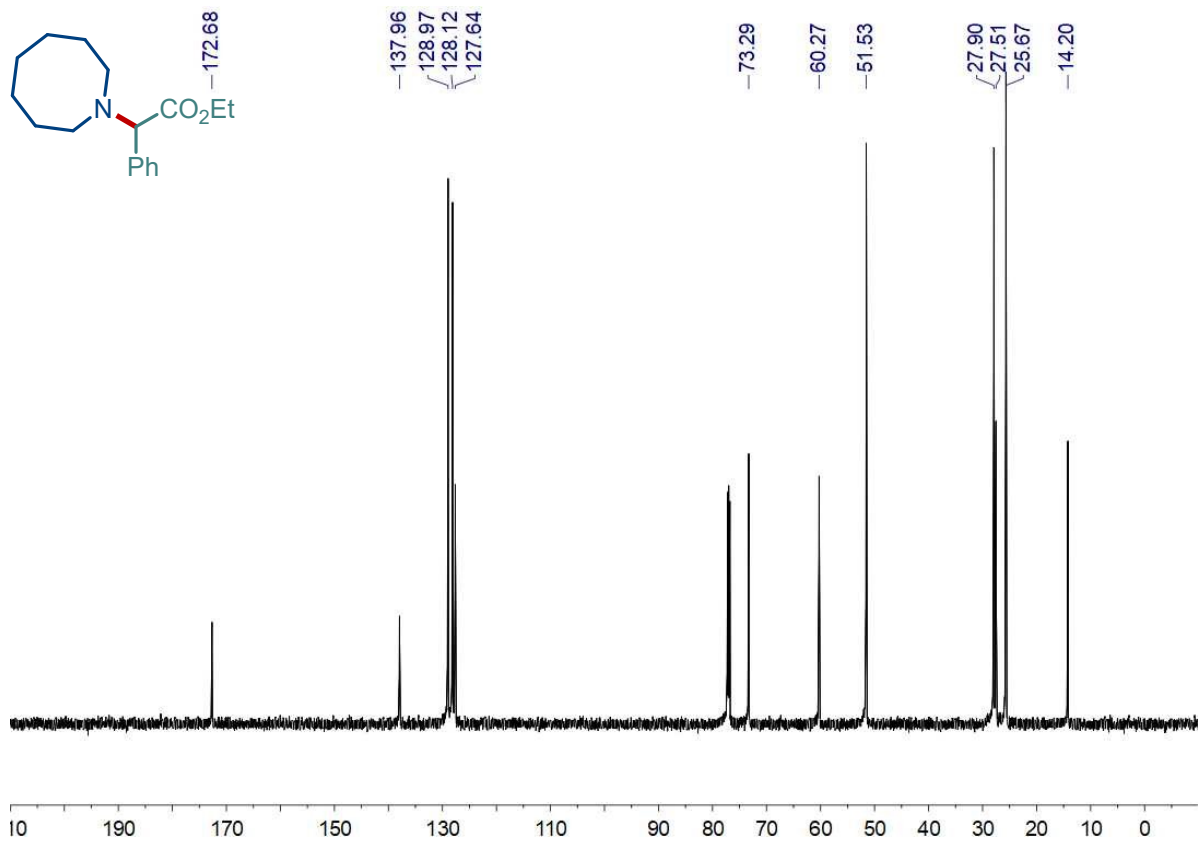

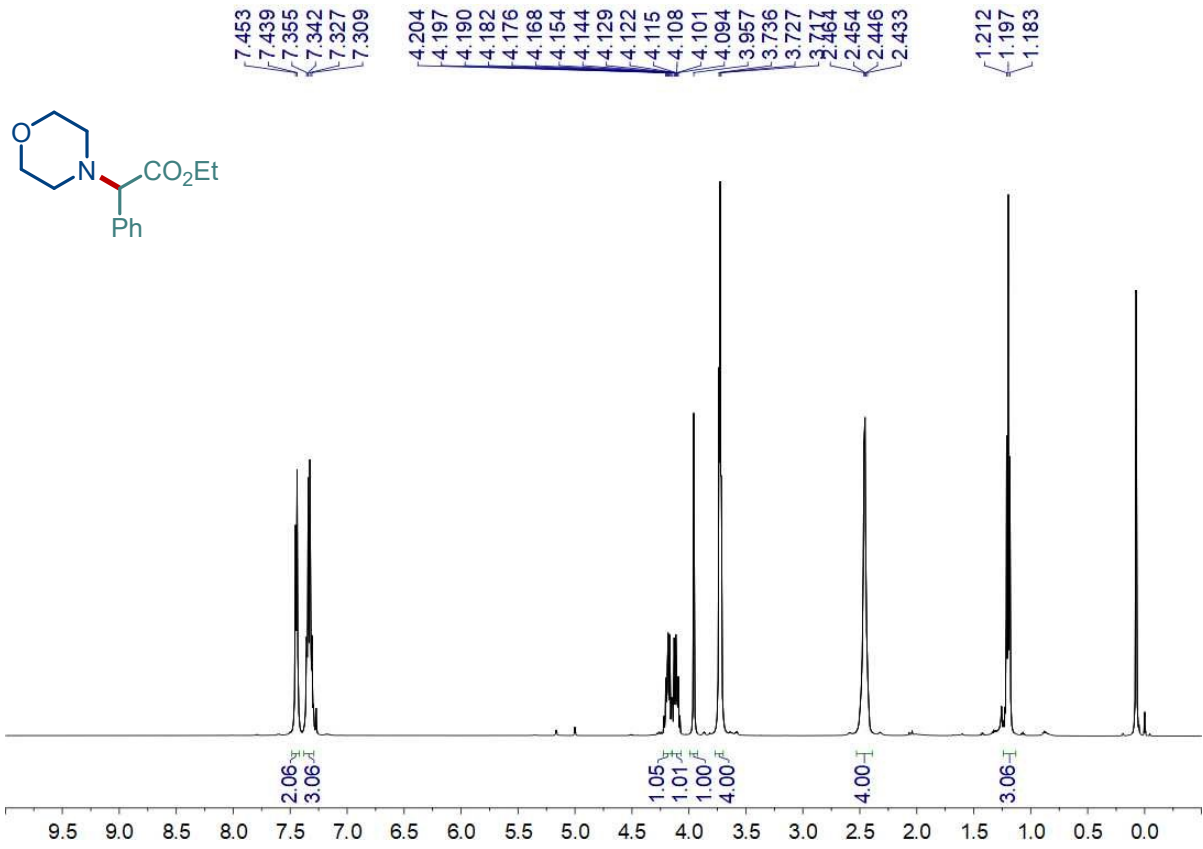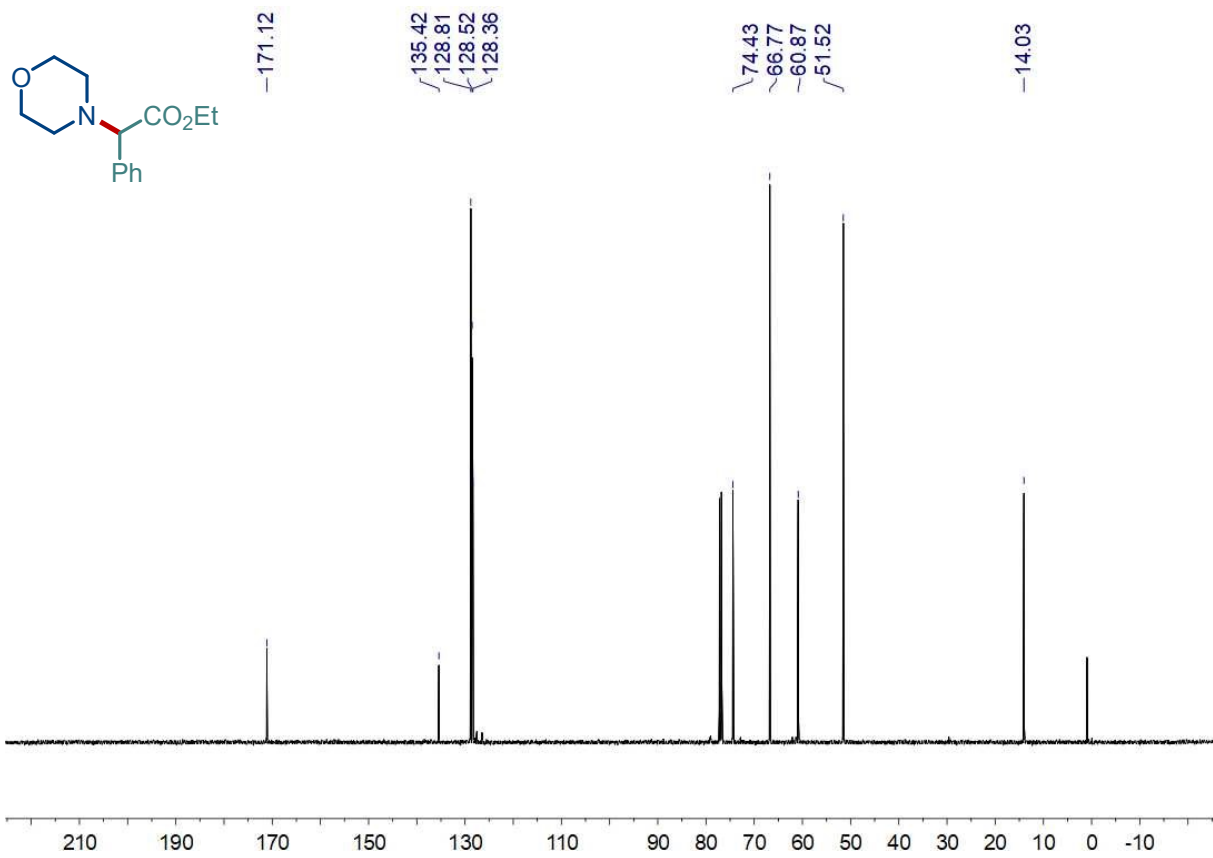

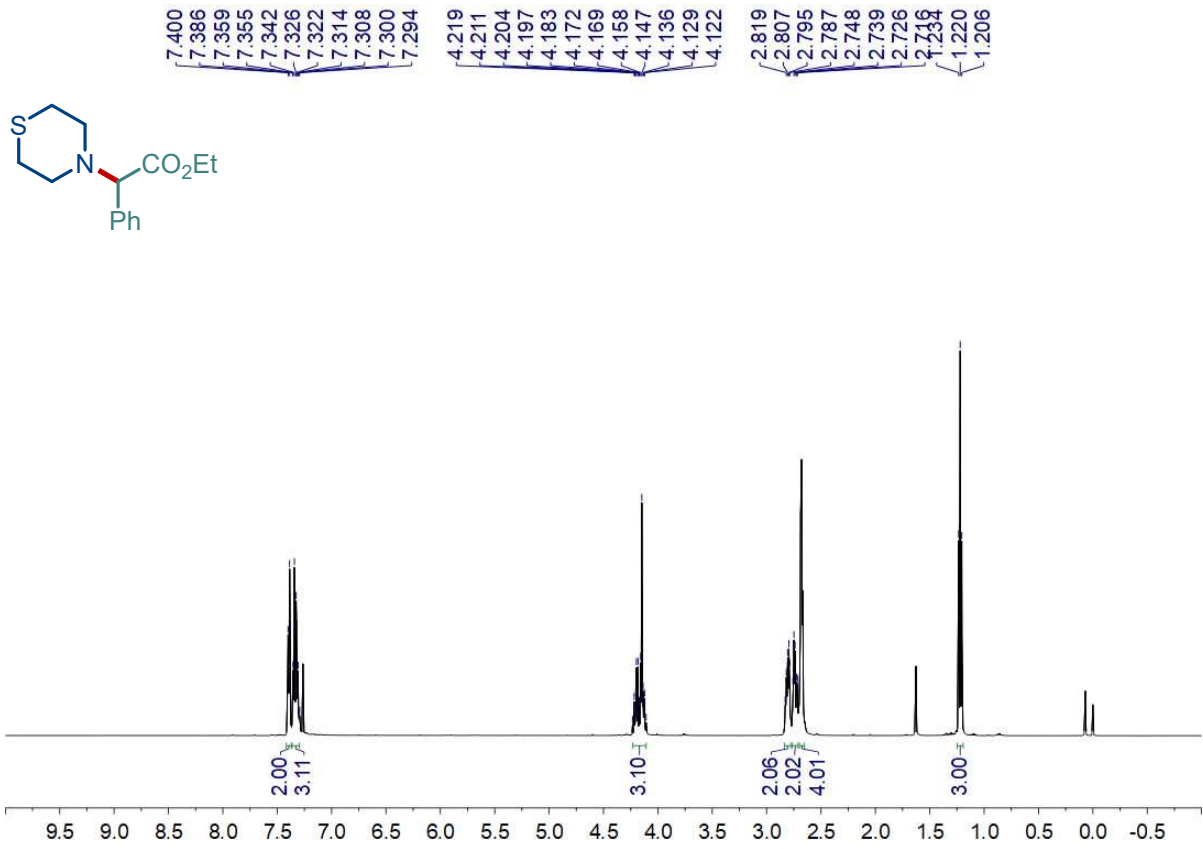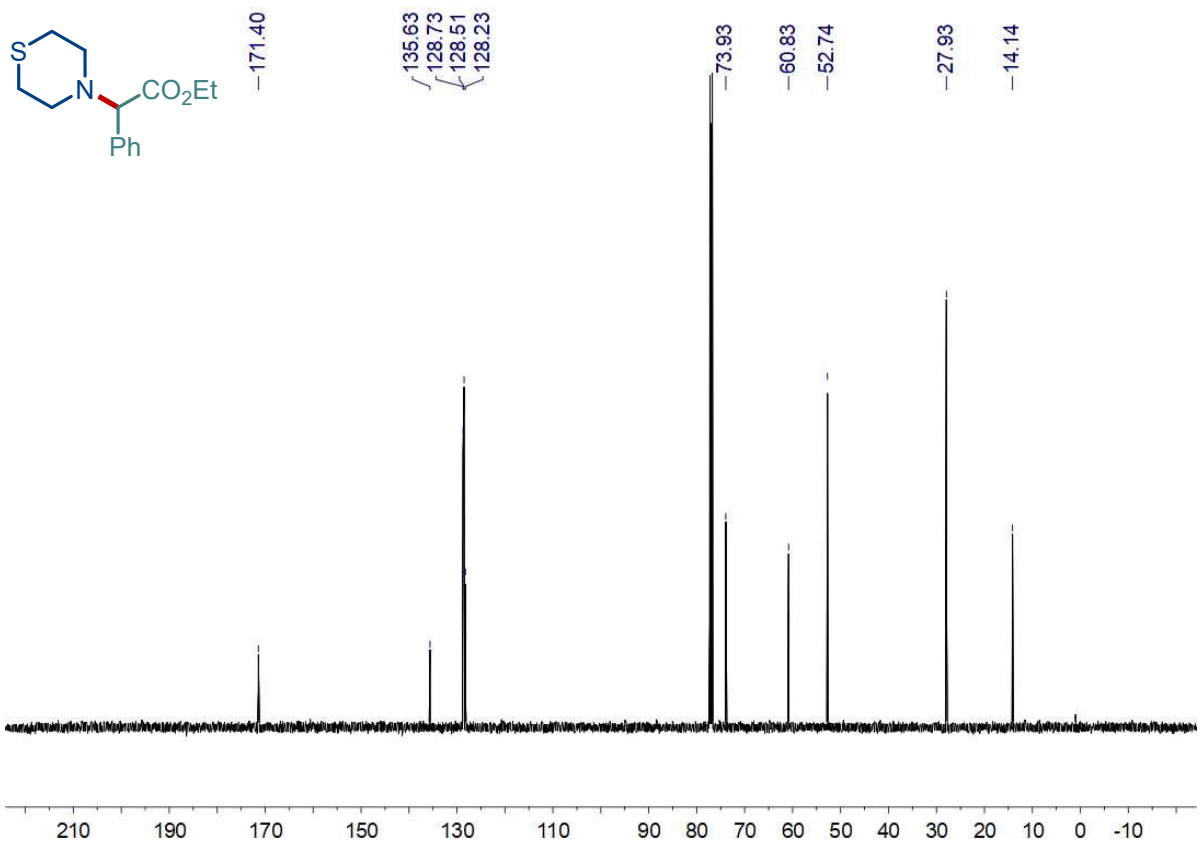

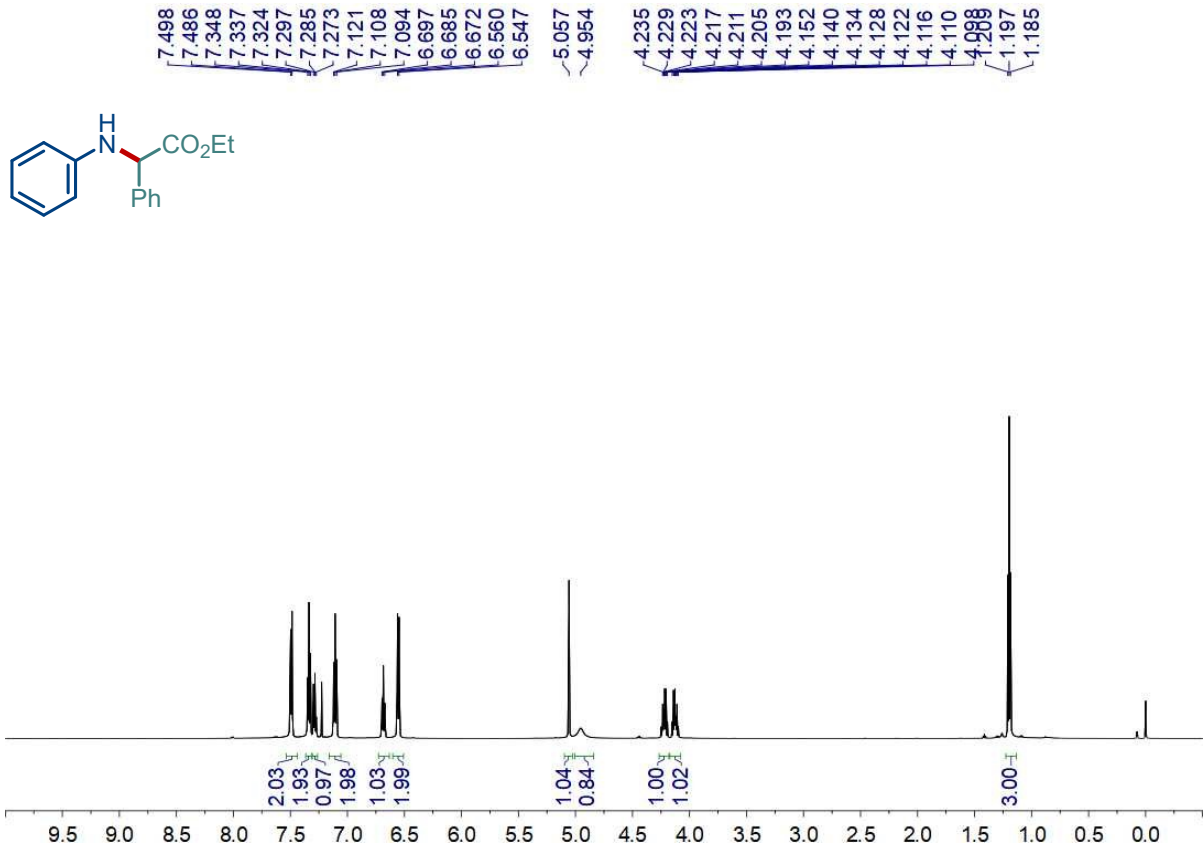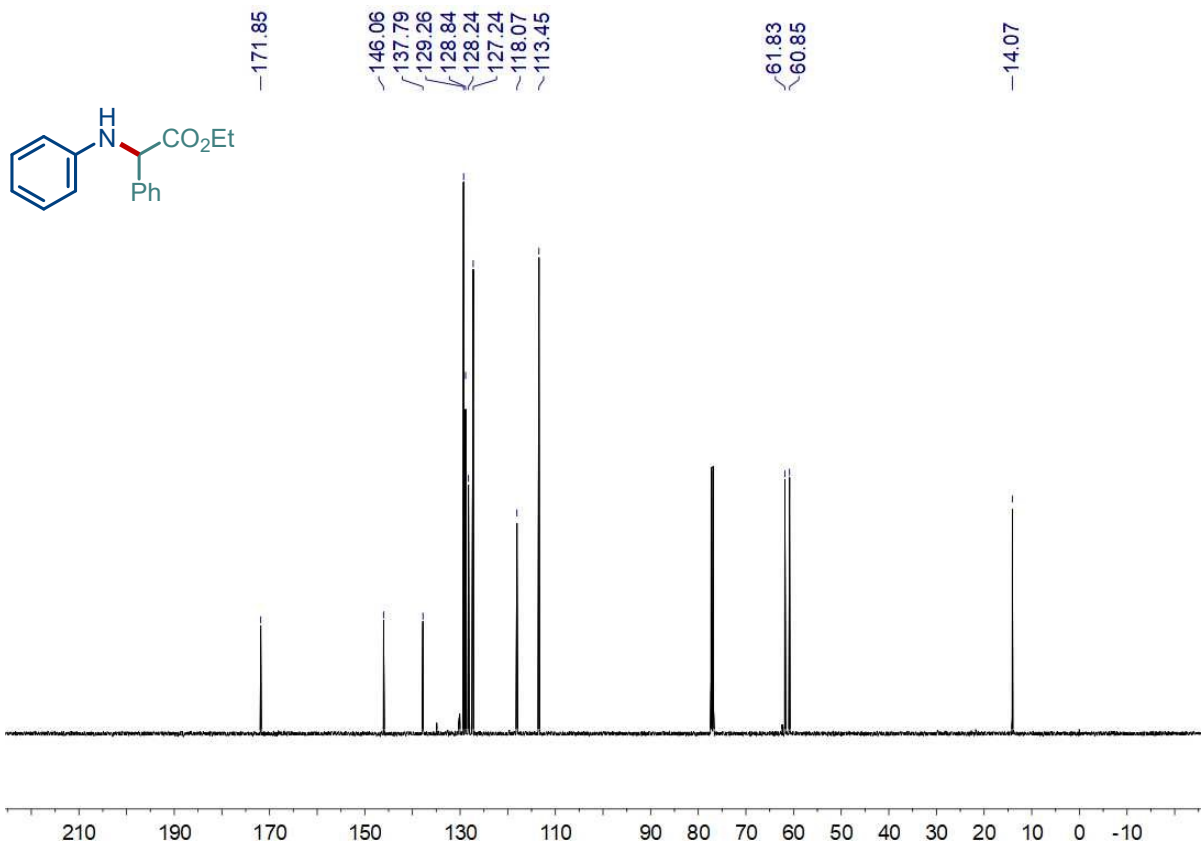

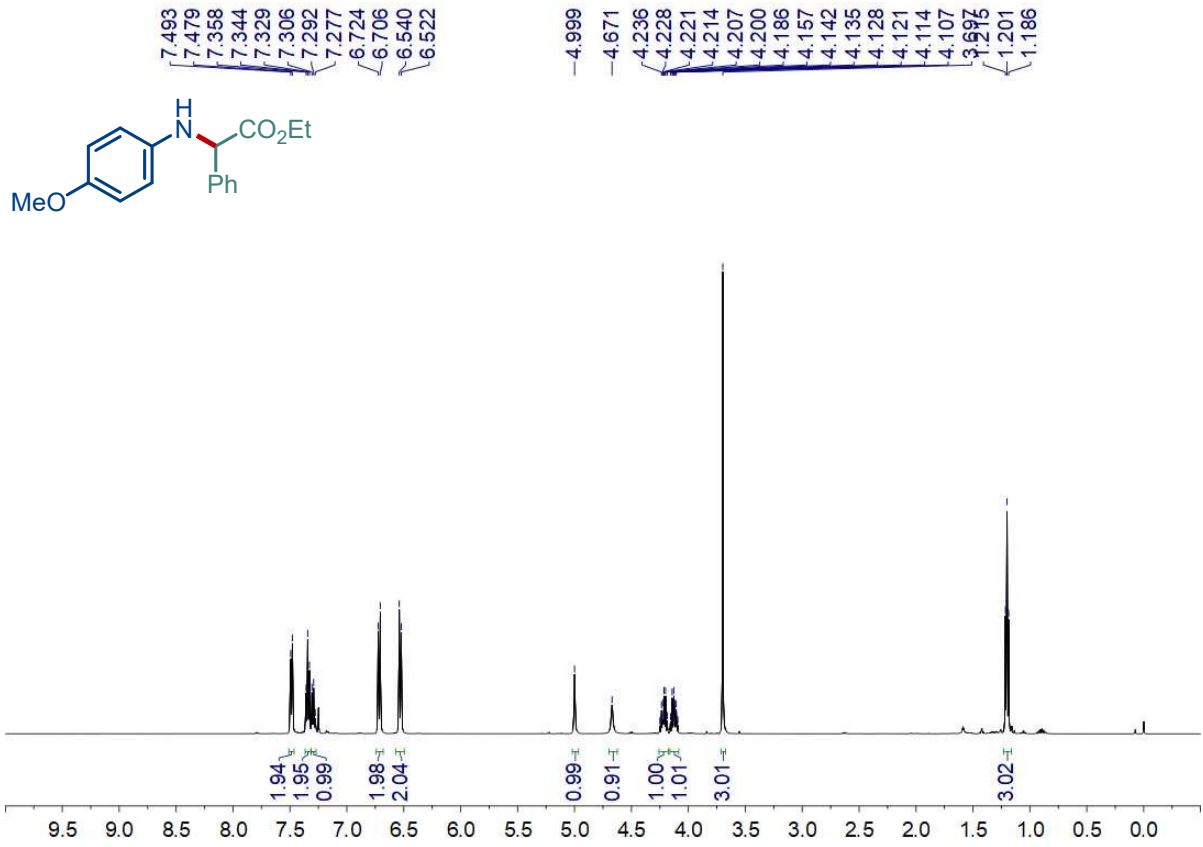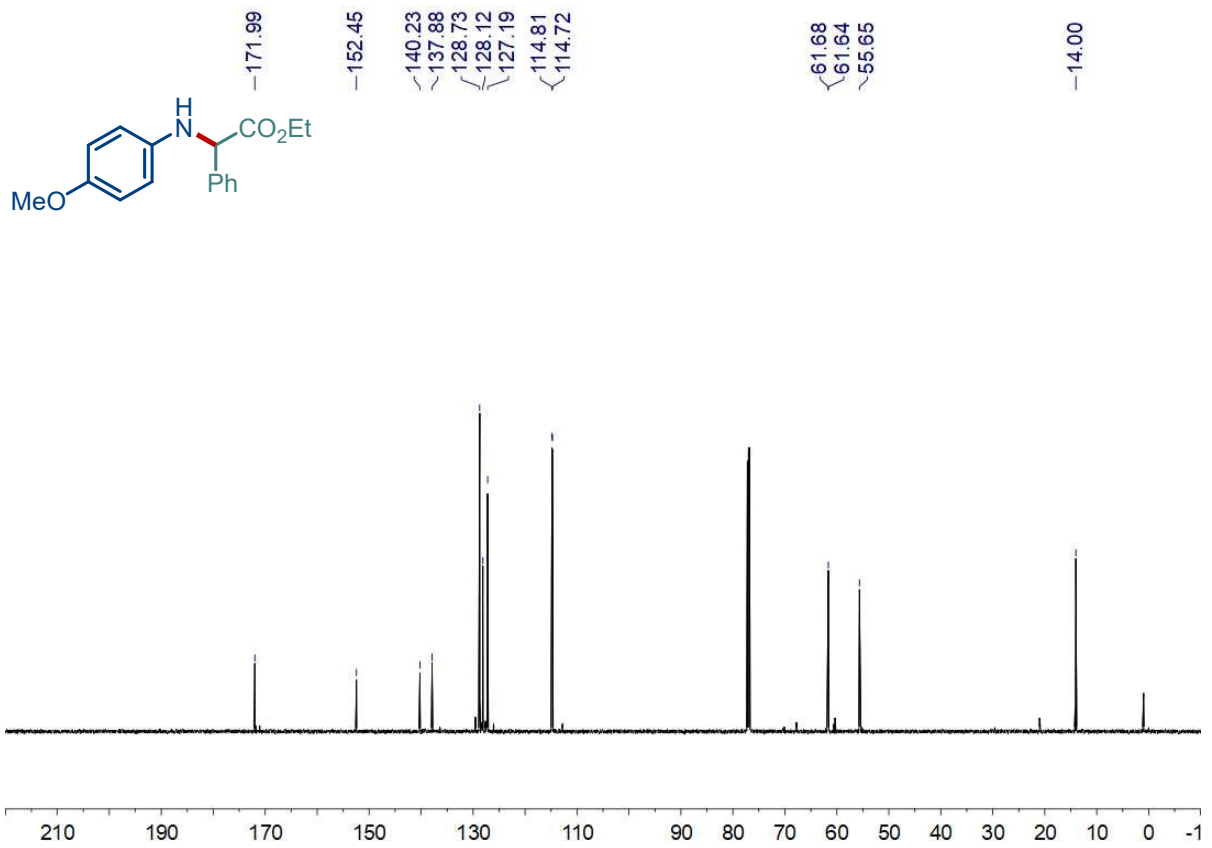

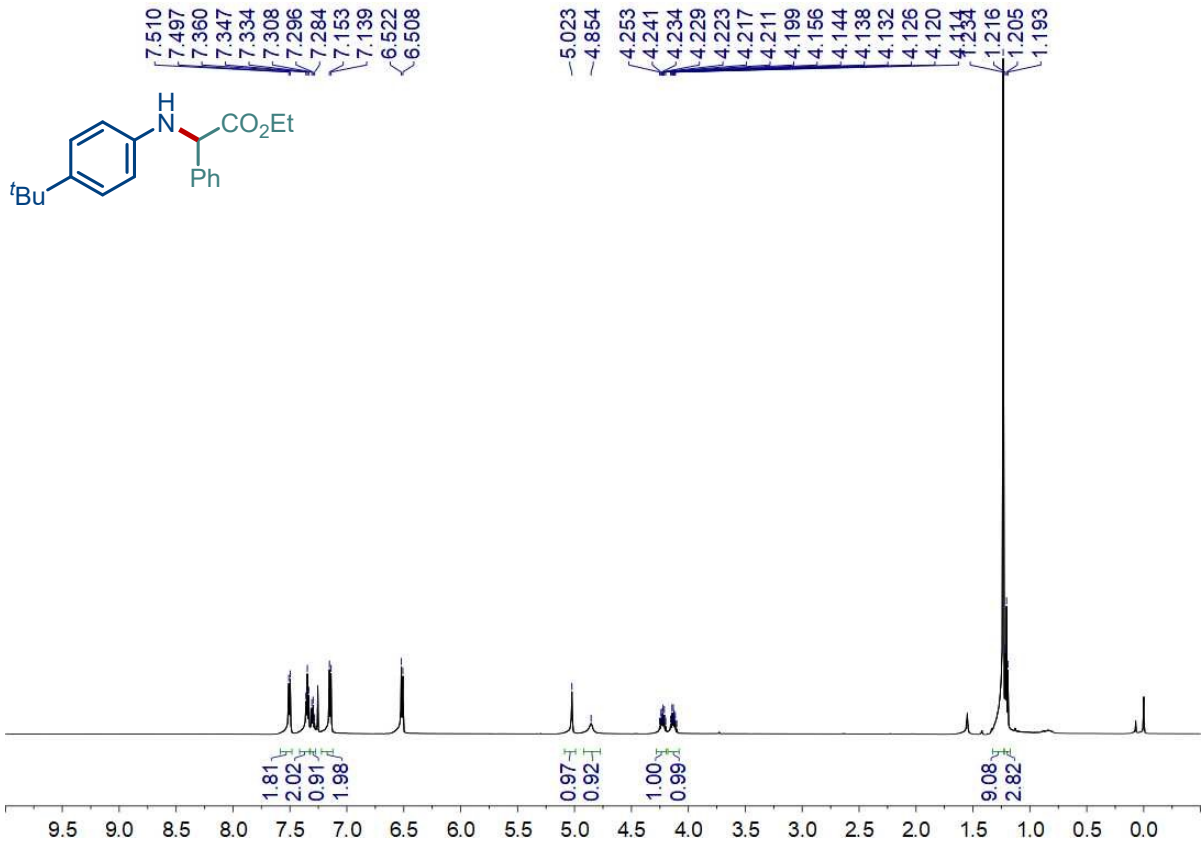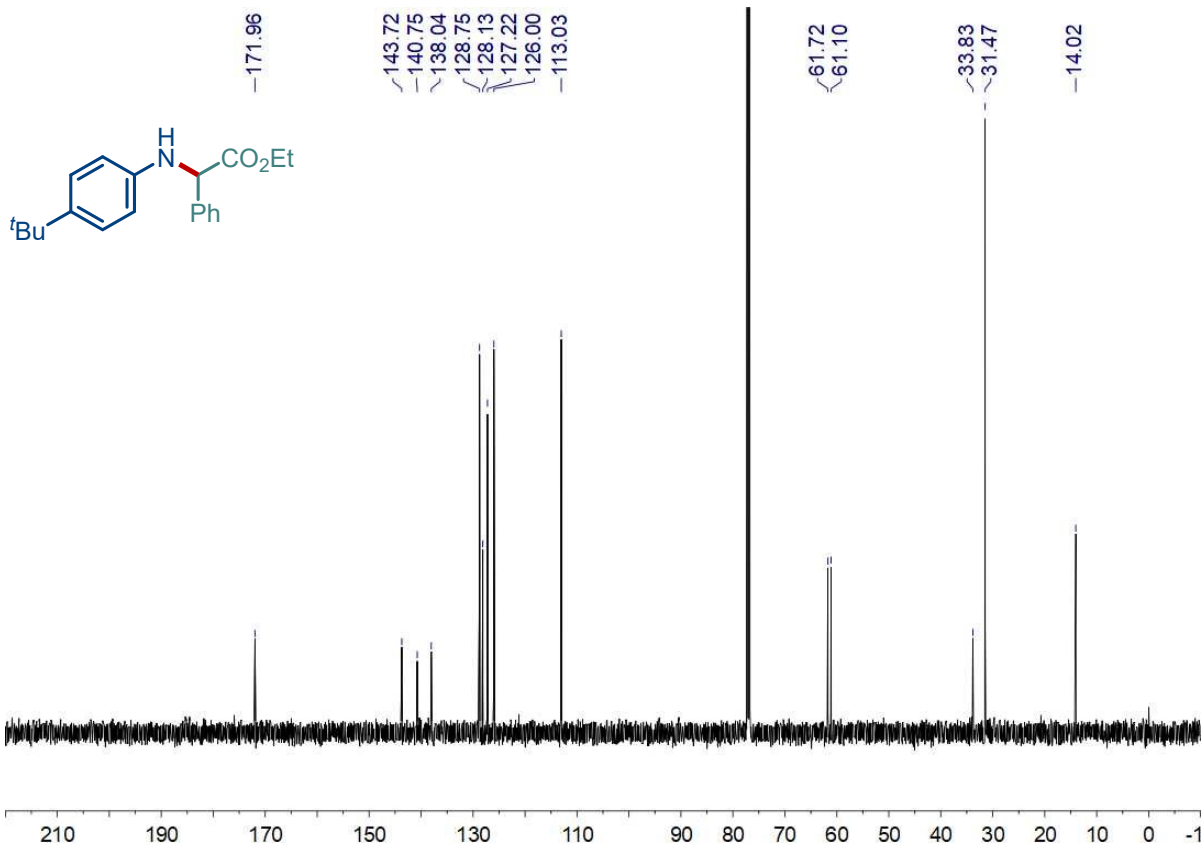

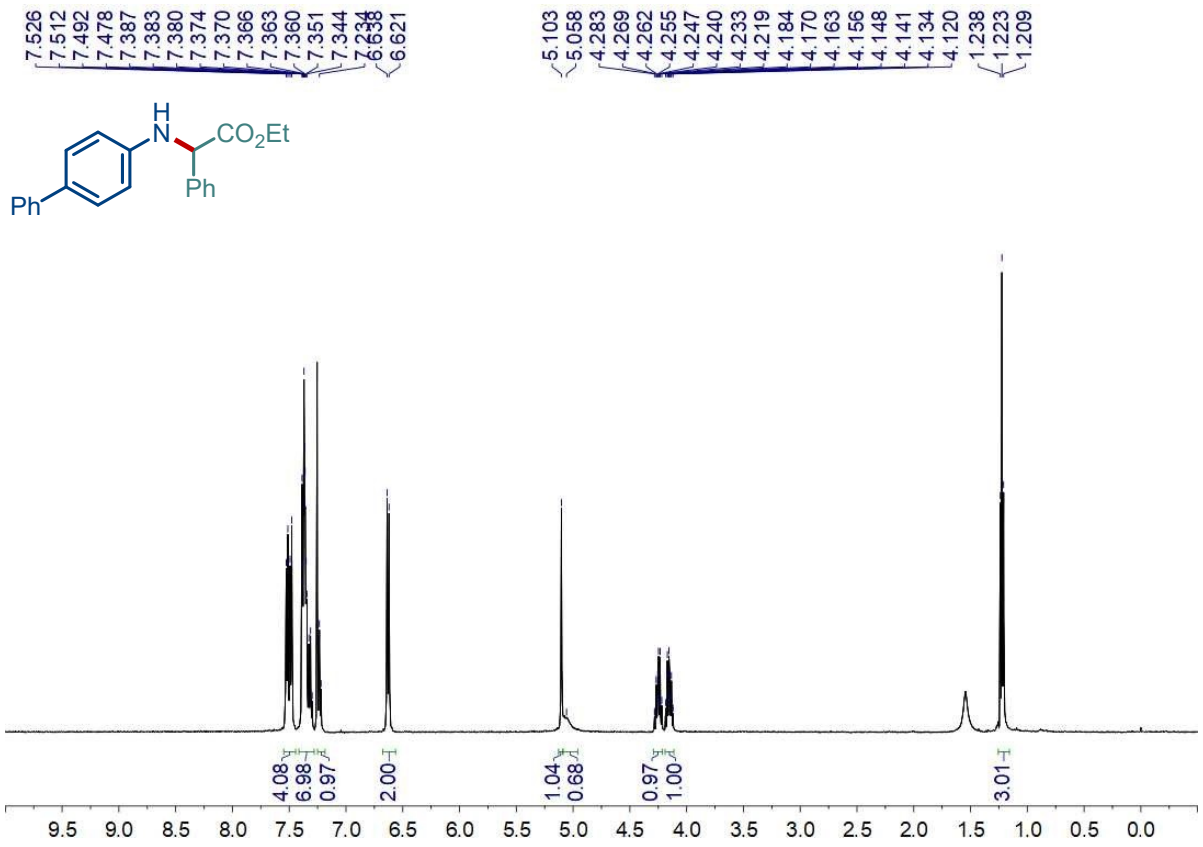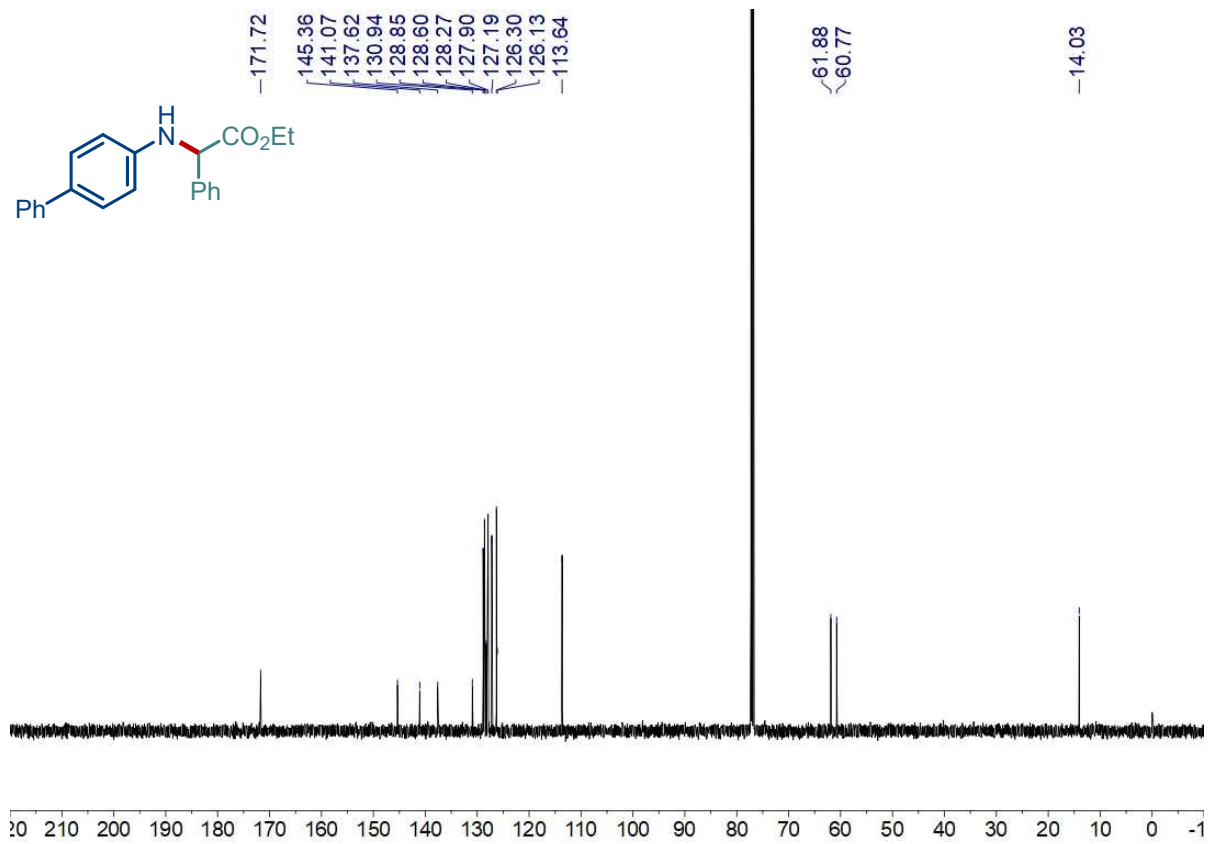

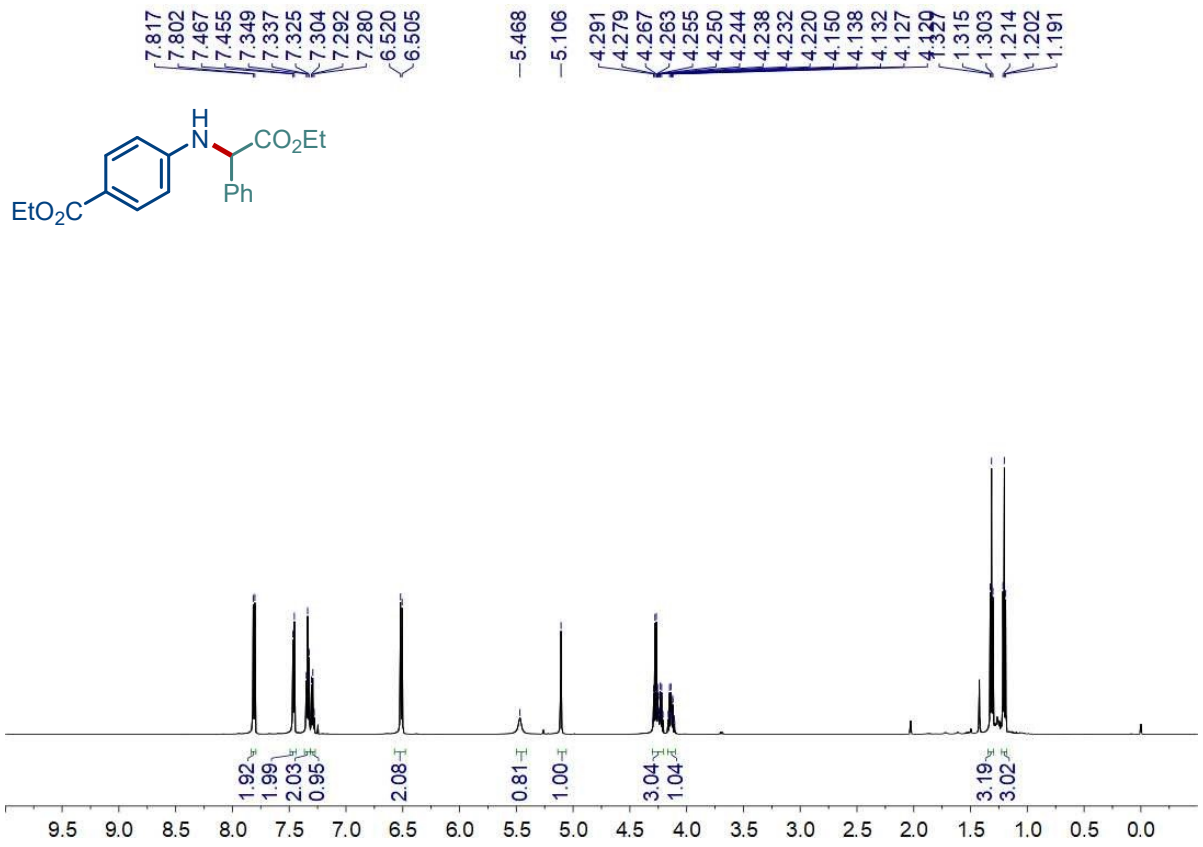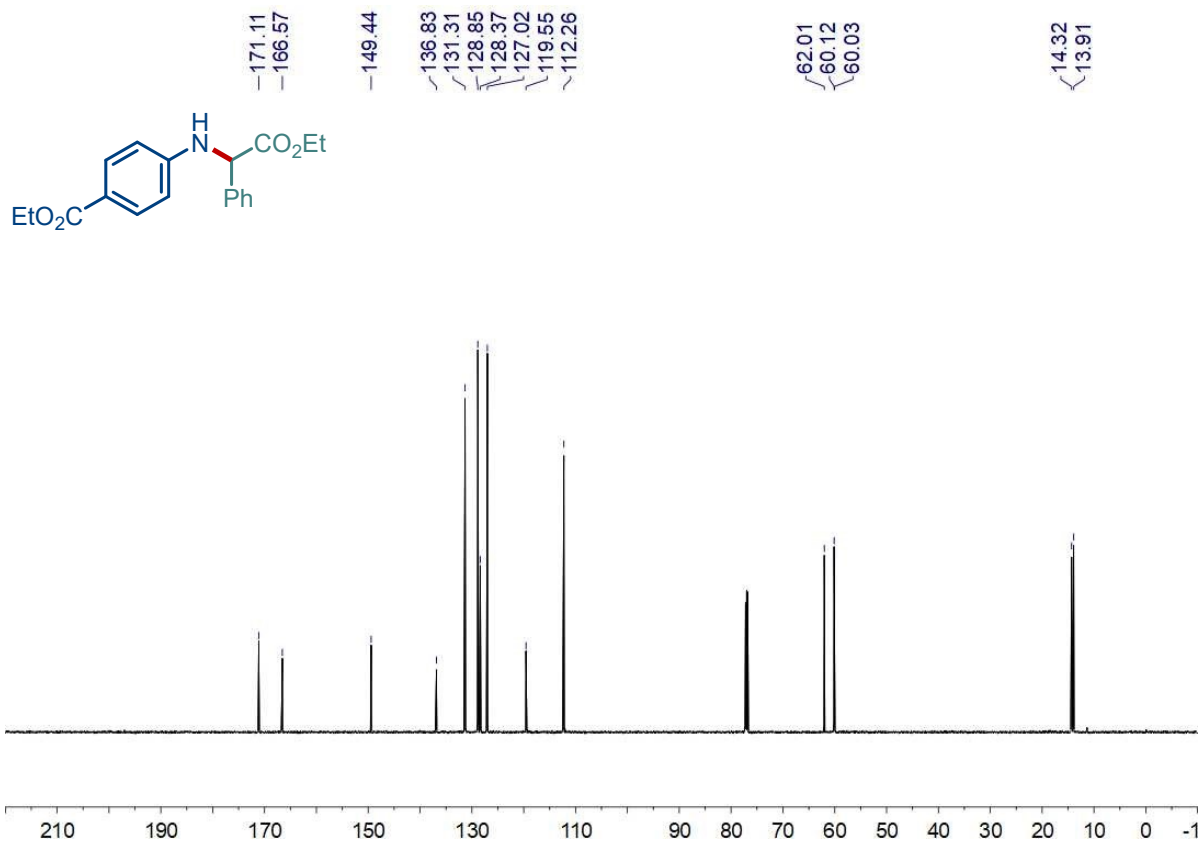



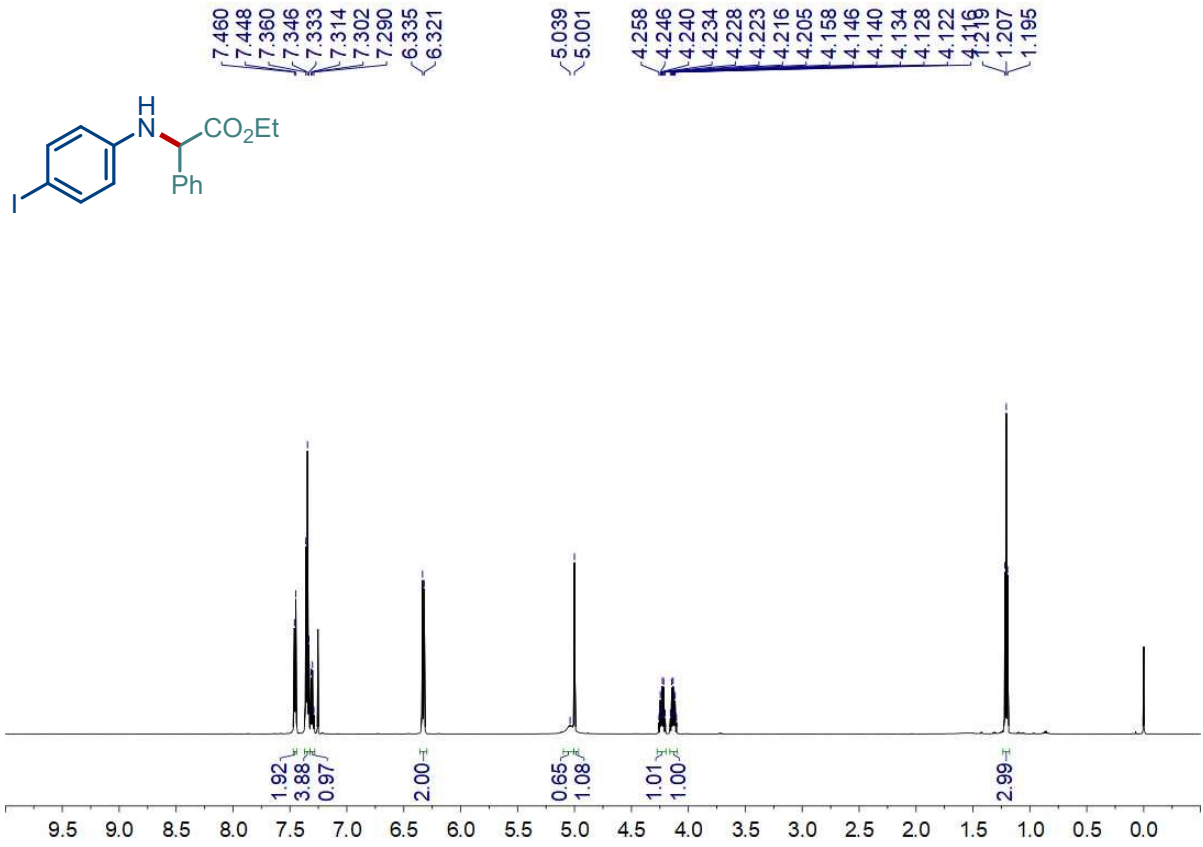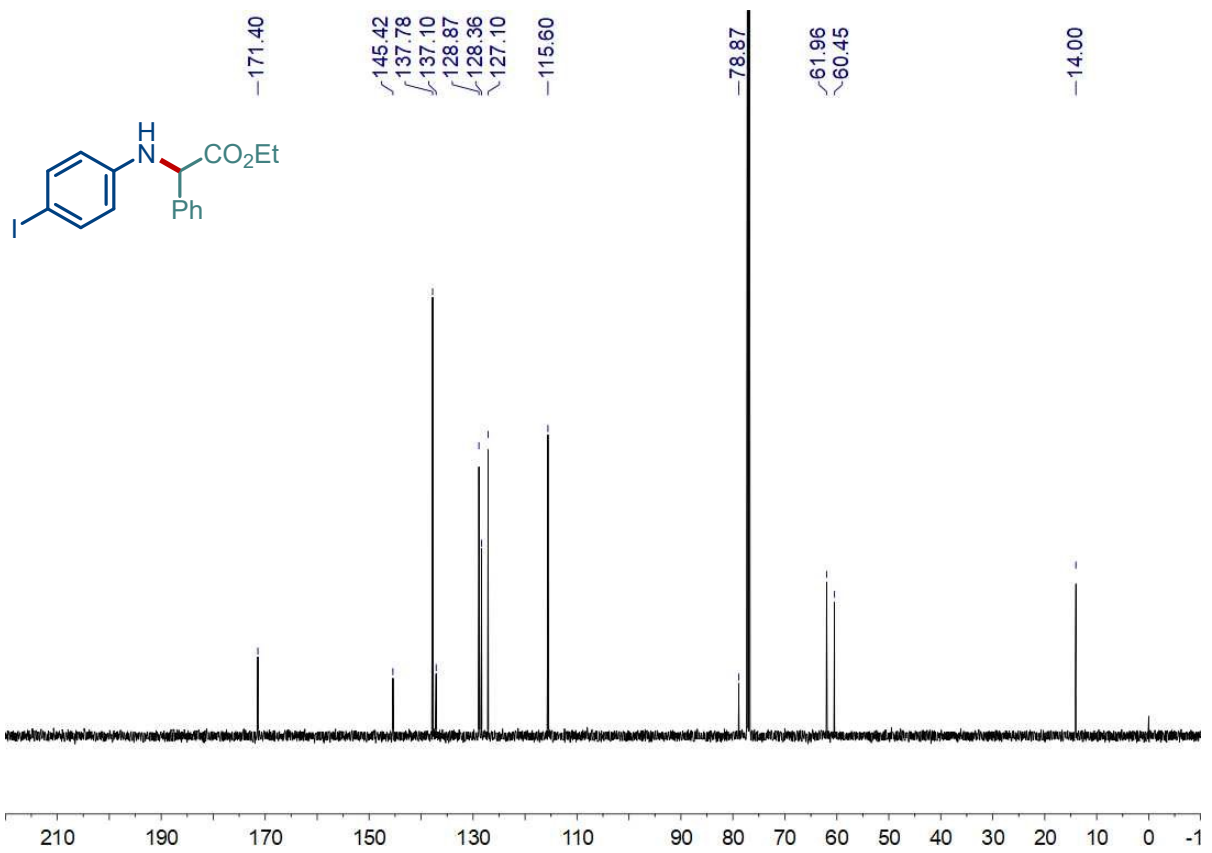

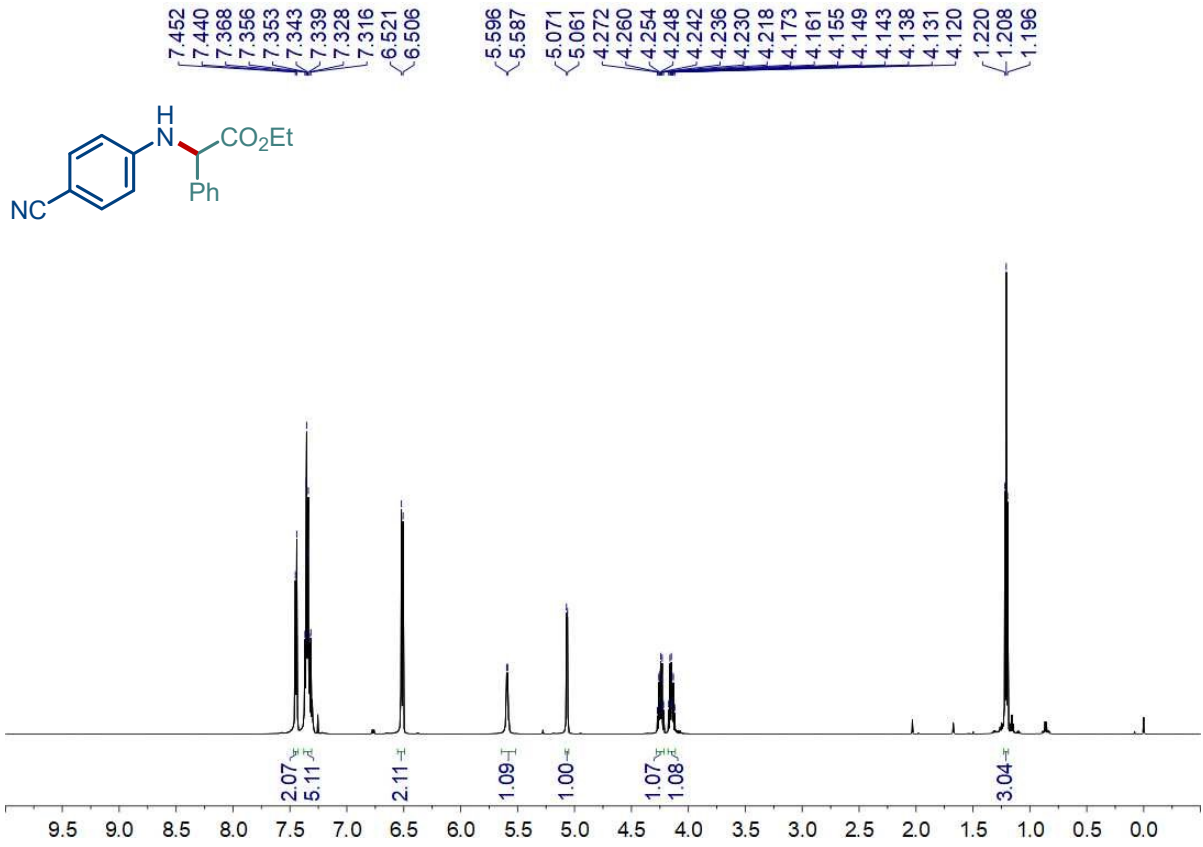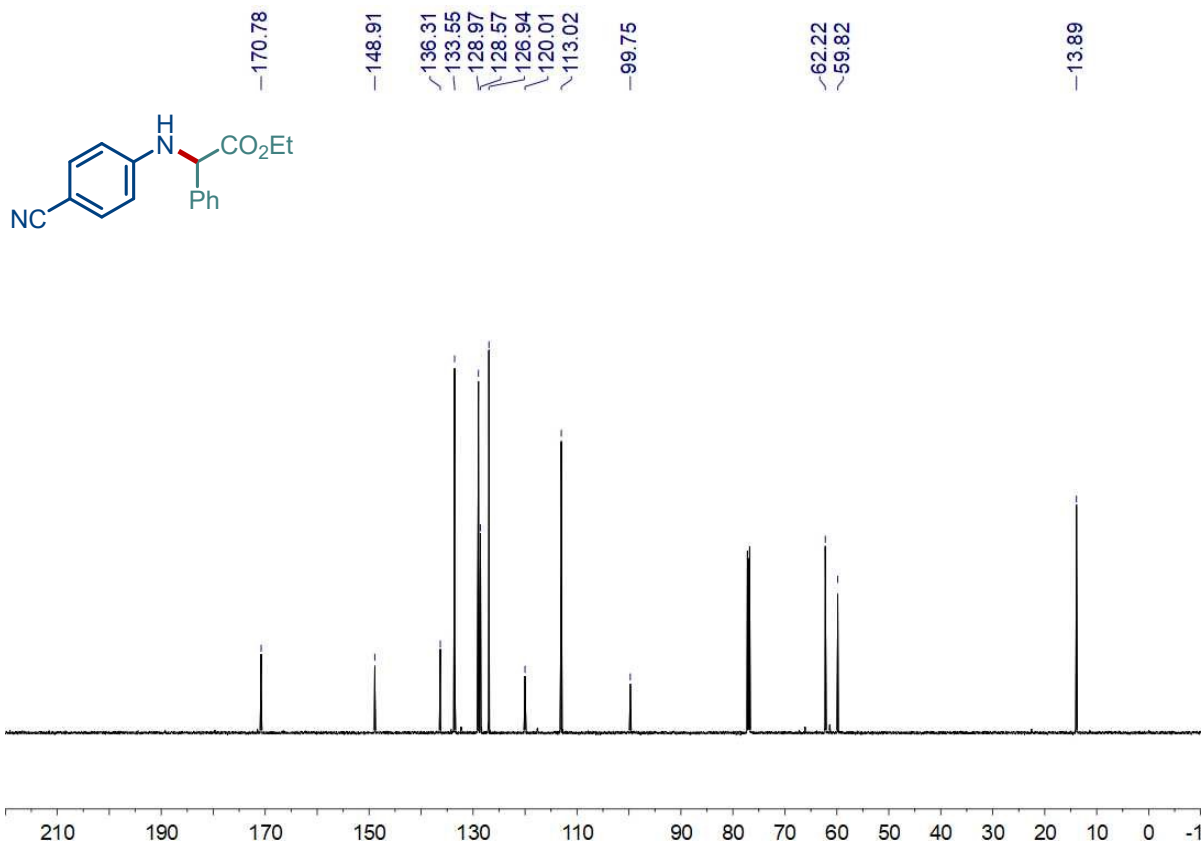

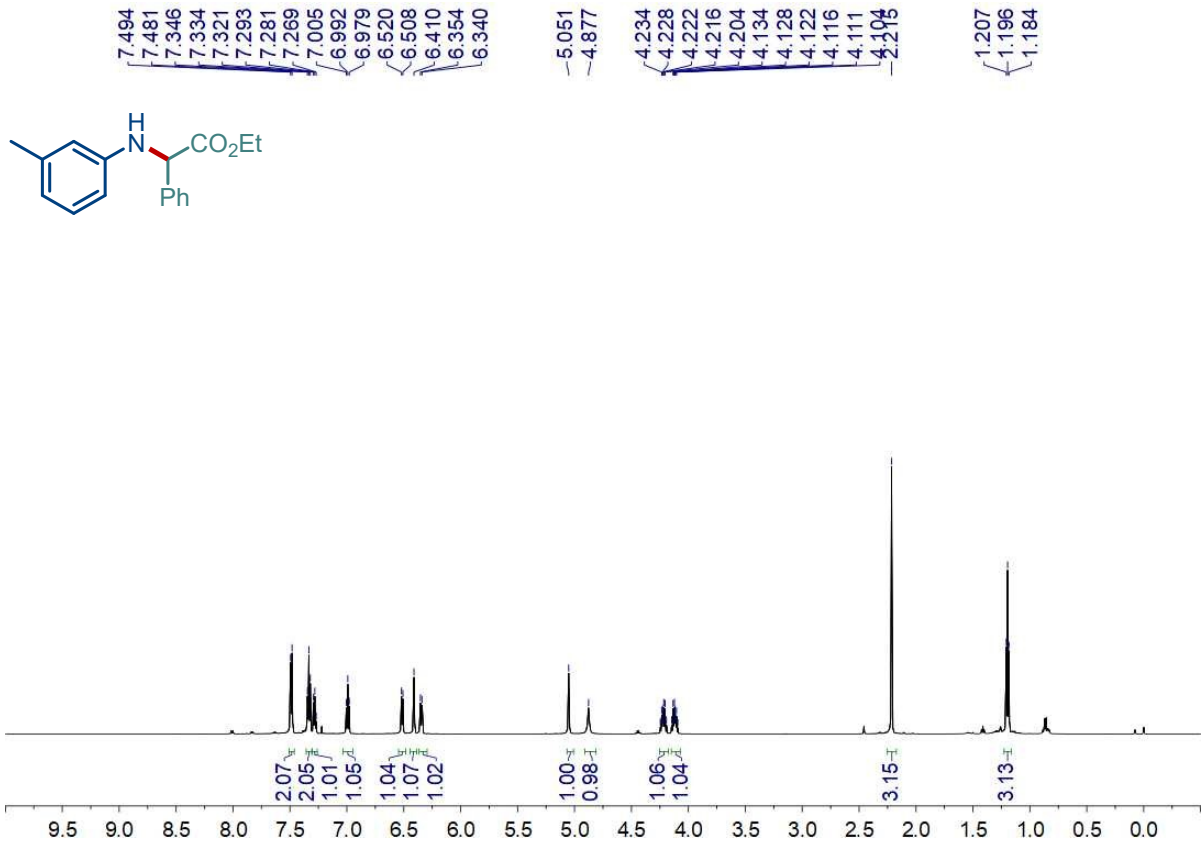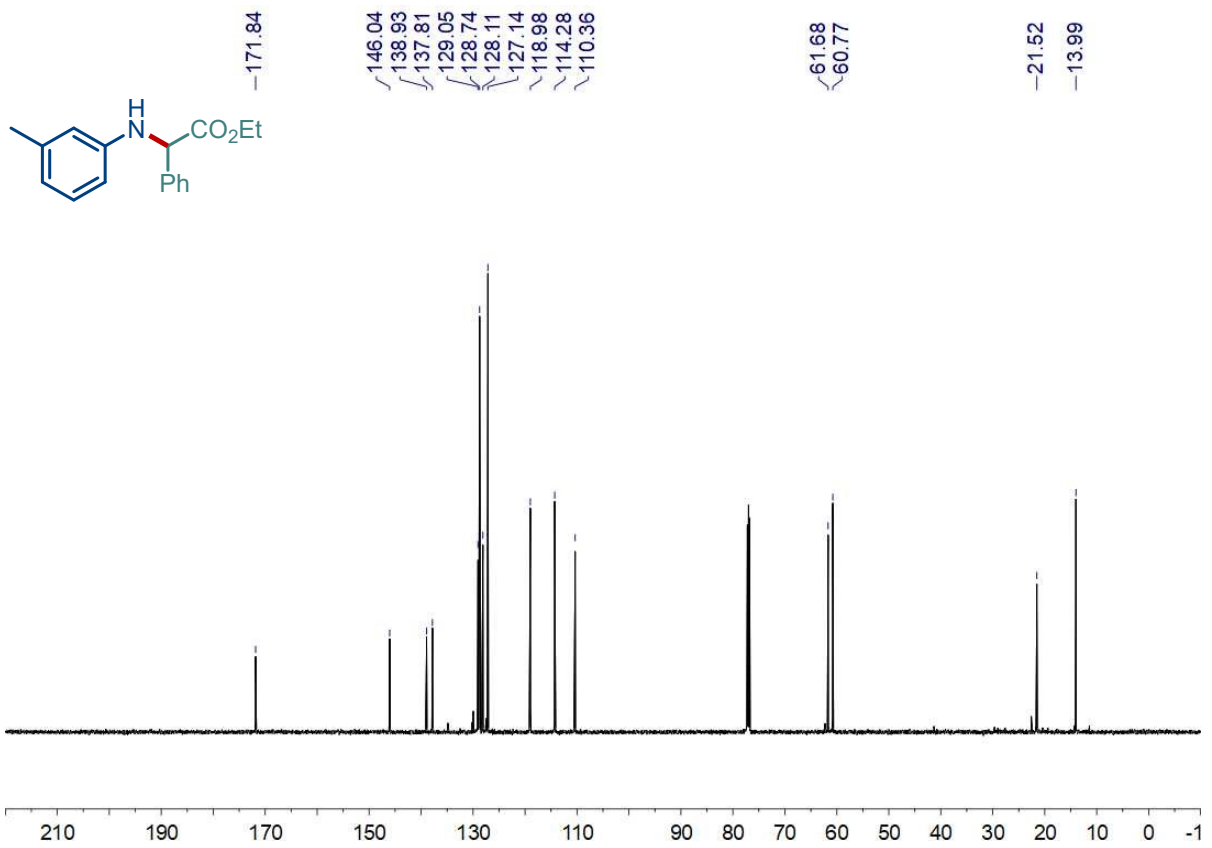

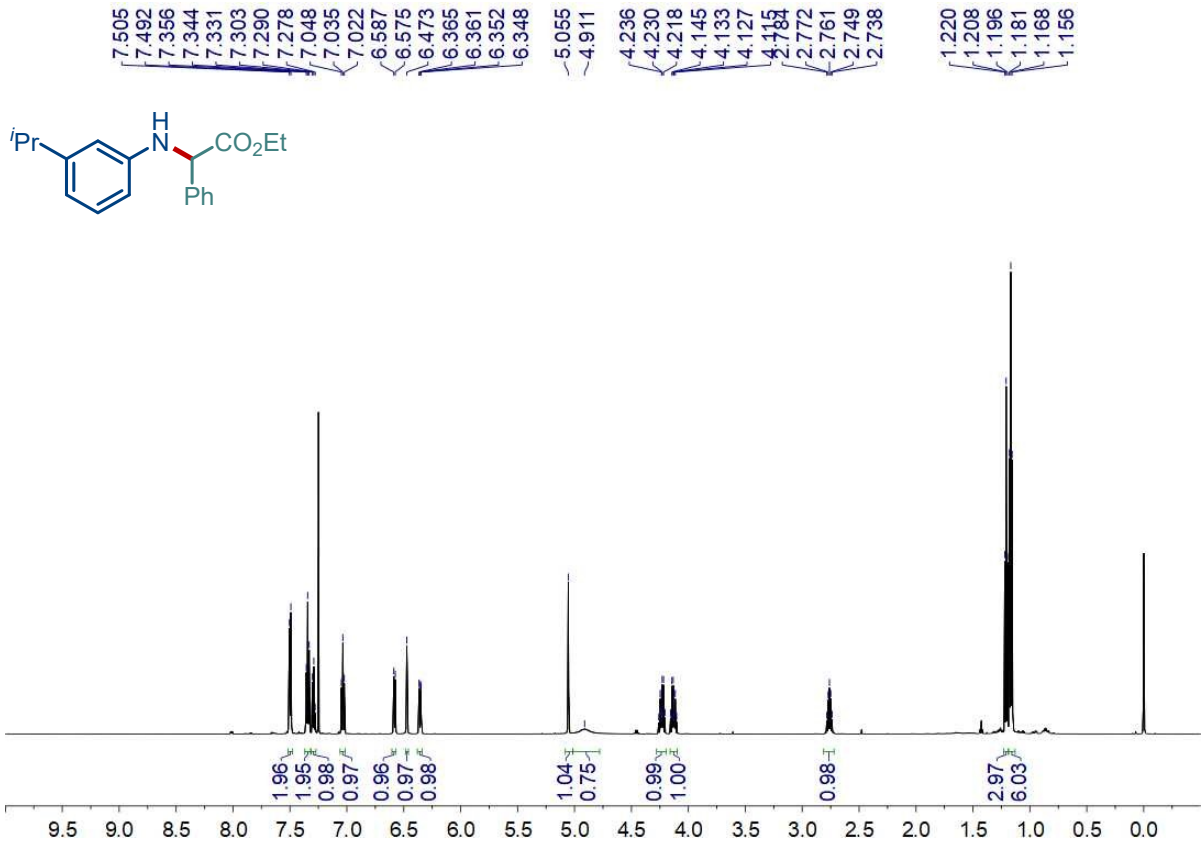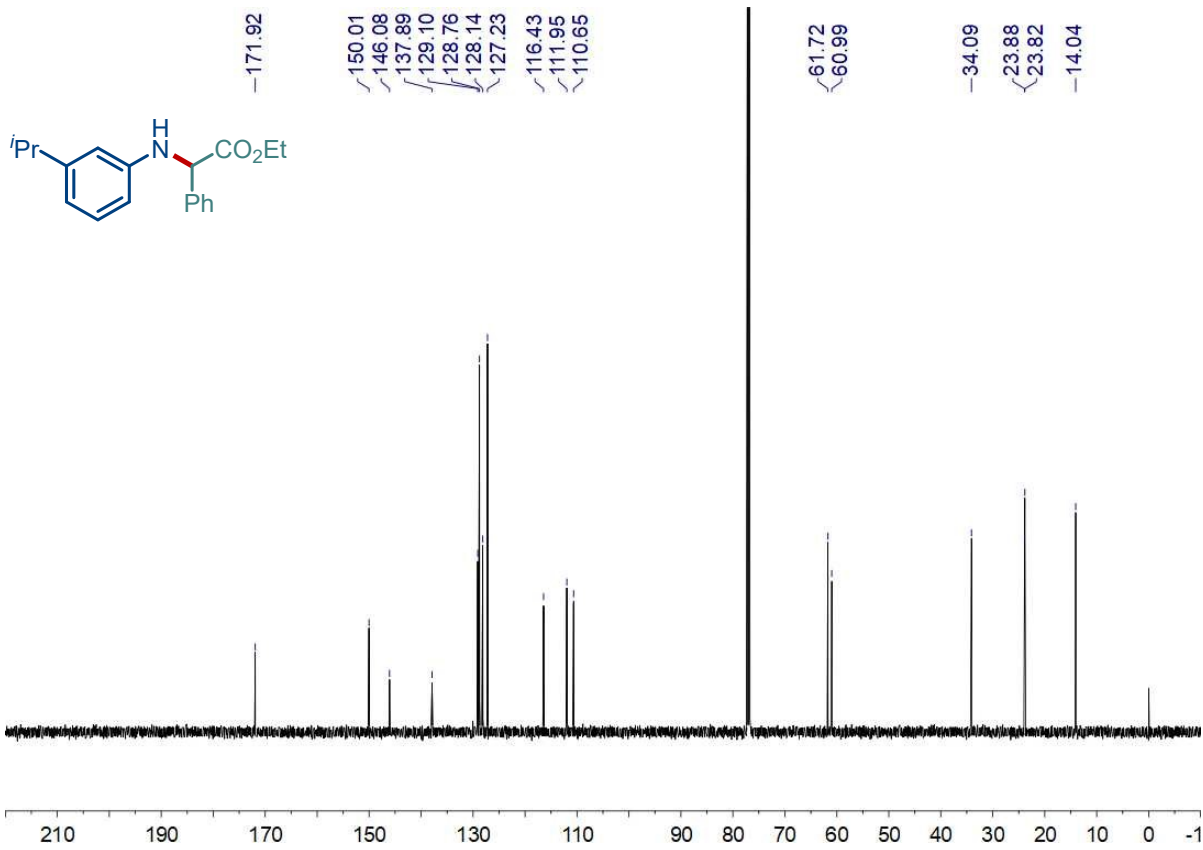

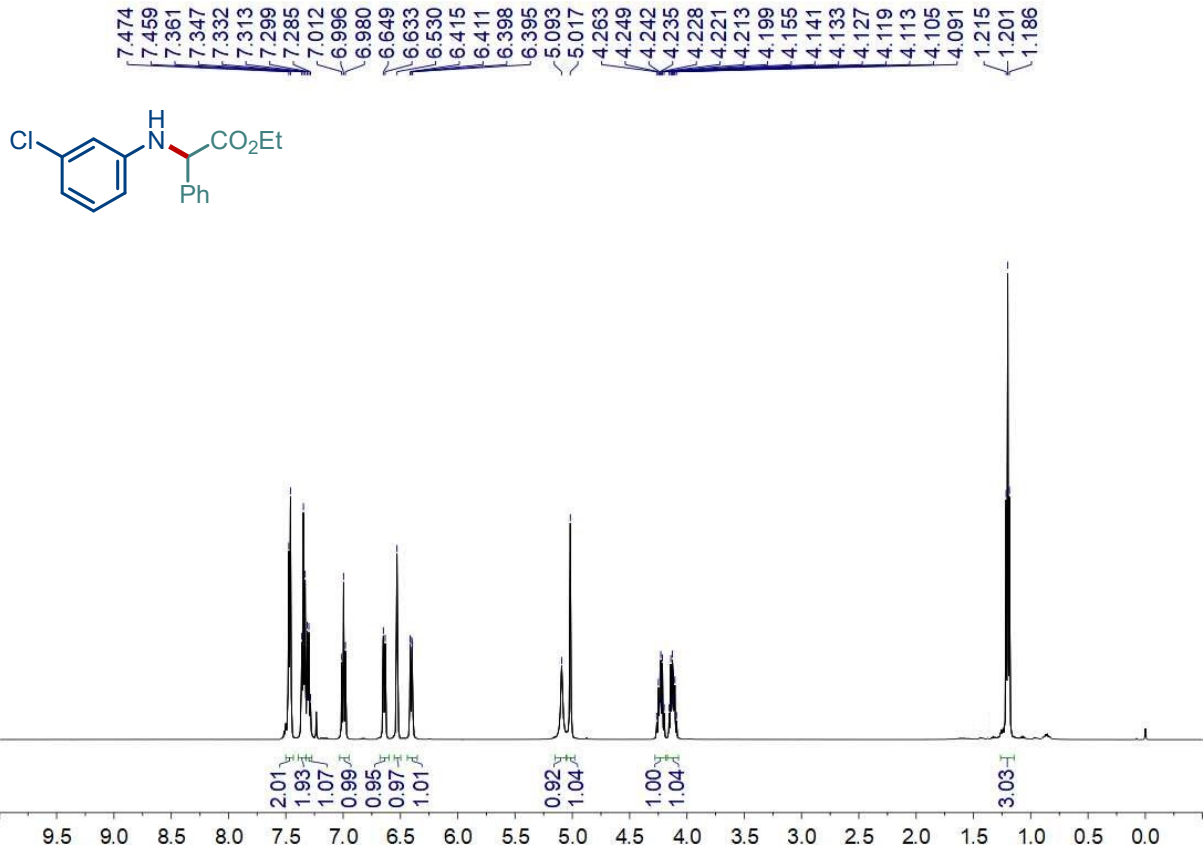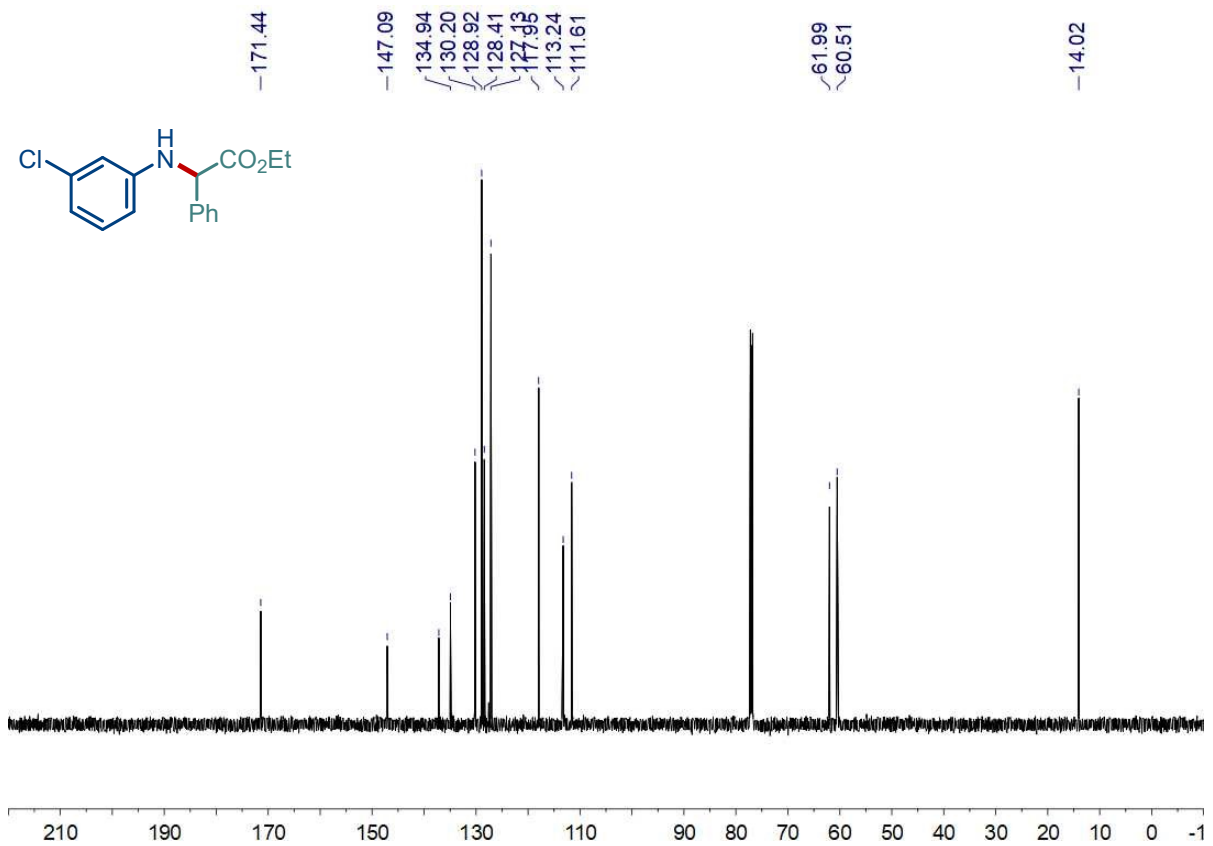

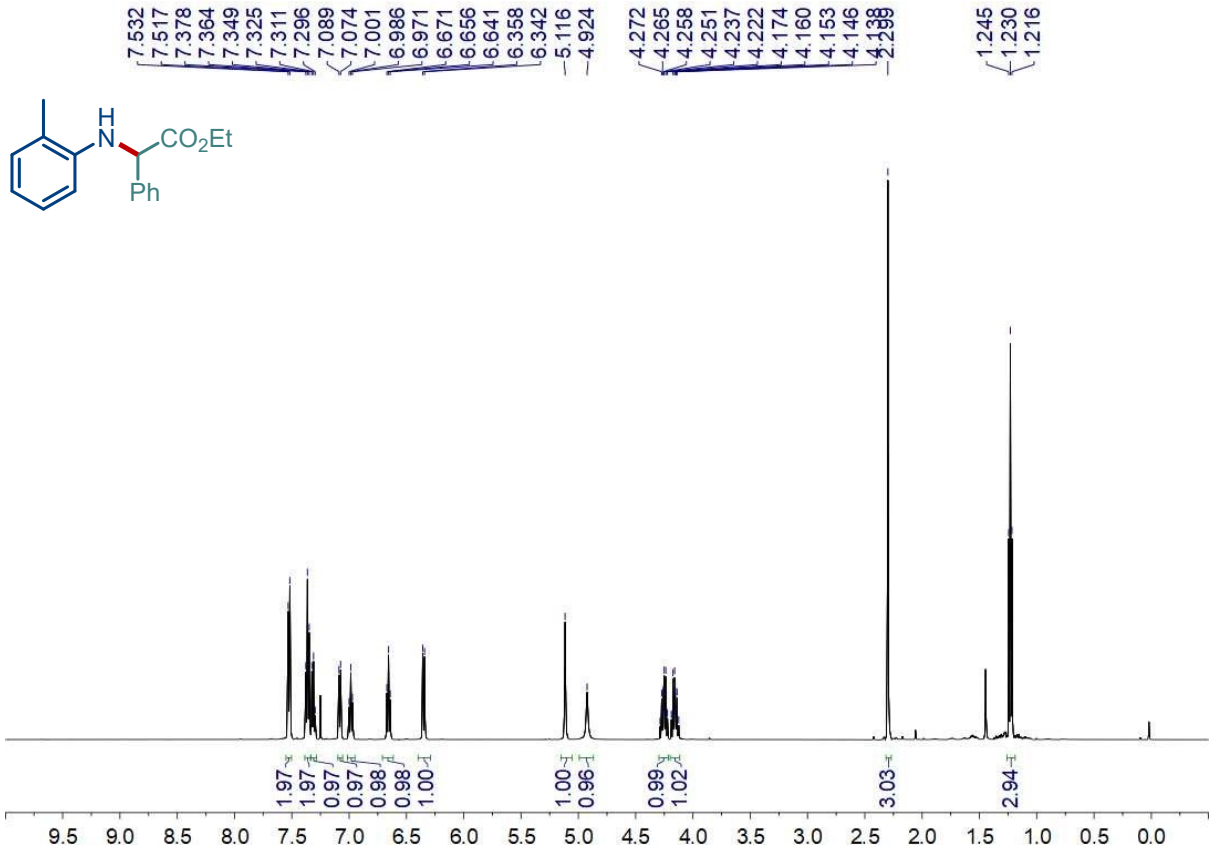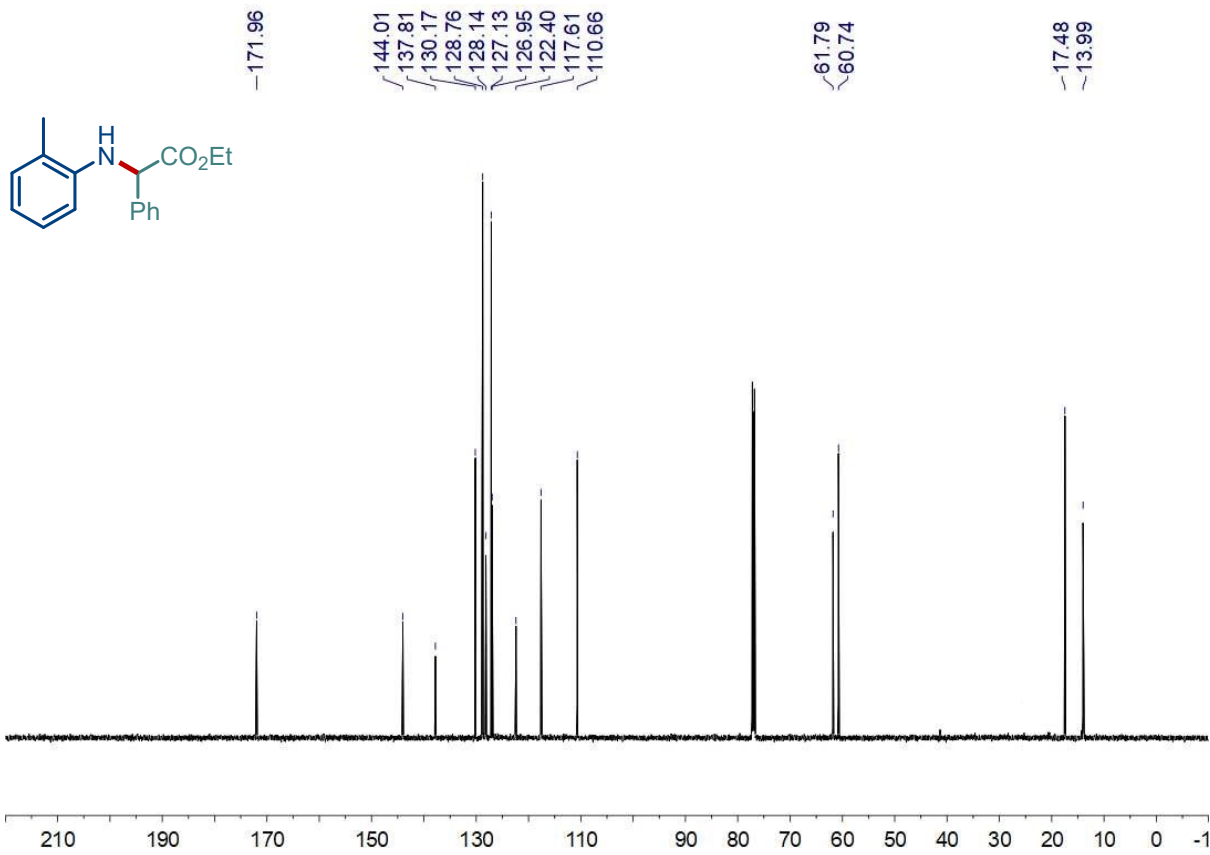

7.535  
7.532  
7.519  
7.517  
7.508  
7.494  
7.478  
7.445  
7.431  
7.395  
7.381  
7.367  
7.343  
7.329  
7.313  
7.294  
7.285  
7.280  
7.265  
7.134  
7.131  
7.119  
7.116  
7.106  
7.103  
7.090  
7.075  
7.072  
6.775  
6.762  
6.760  
6.747  
6.441  
6.425  
5.071  
4.161  
4.154  
4.147  
4.140  
4.125  
4.111  
4.107  
4.093  
4.079  
4.071  
4.065  
4.057  
1.167  
1.152  
1.138

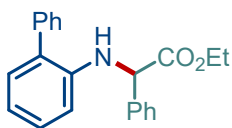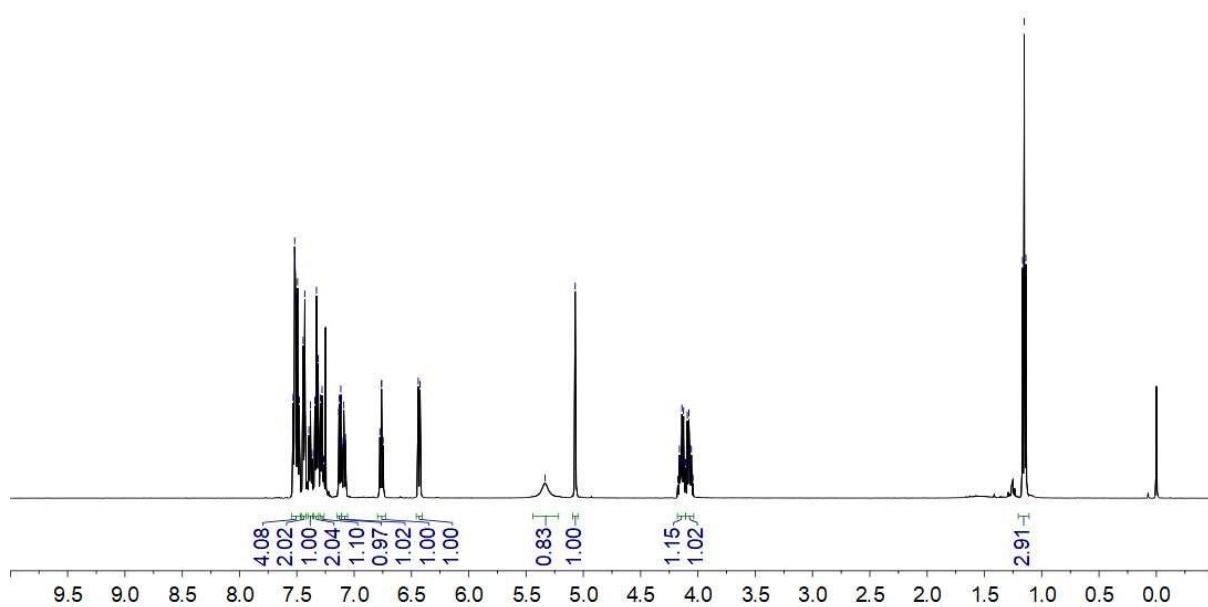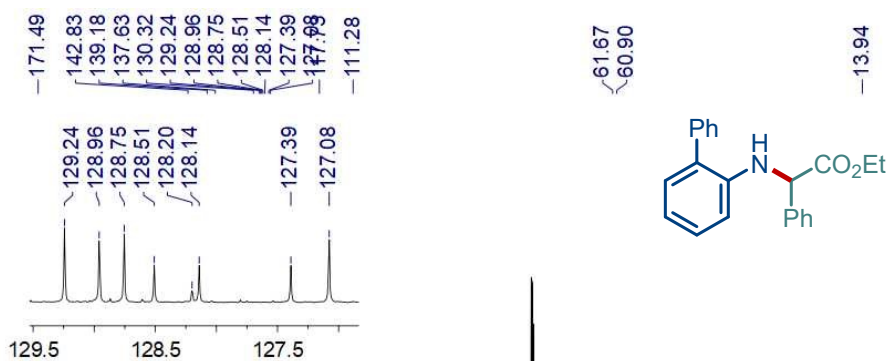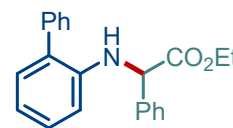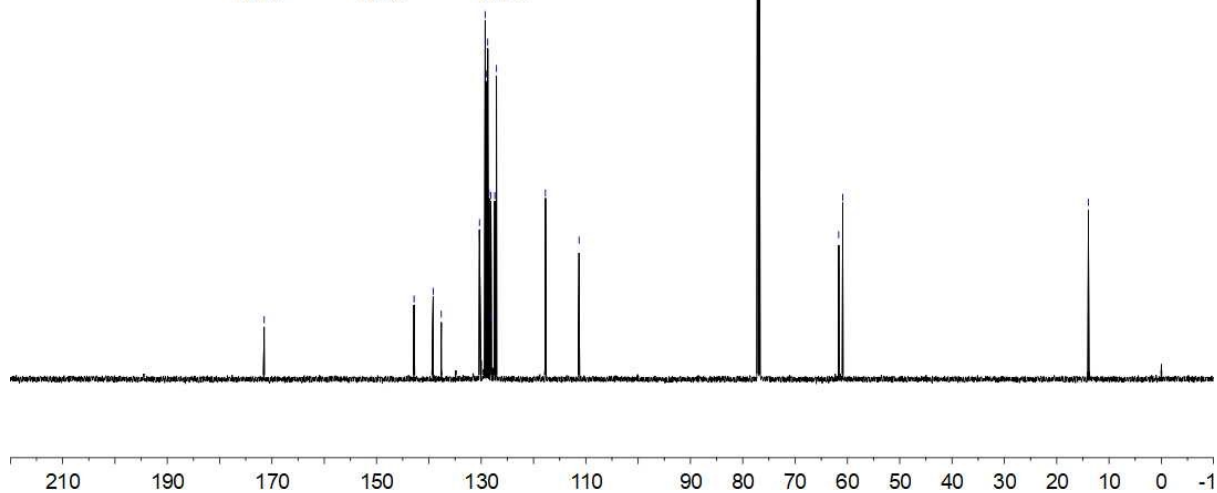

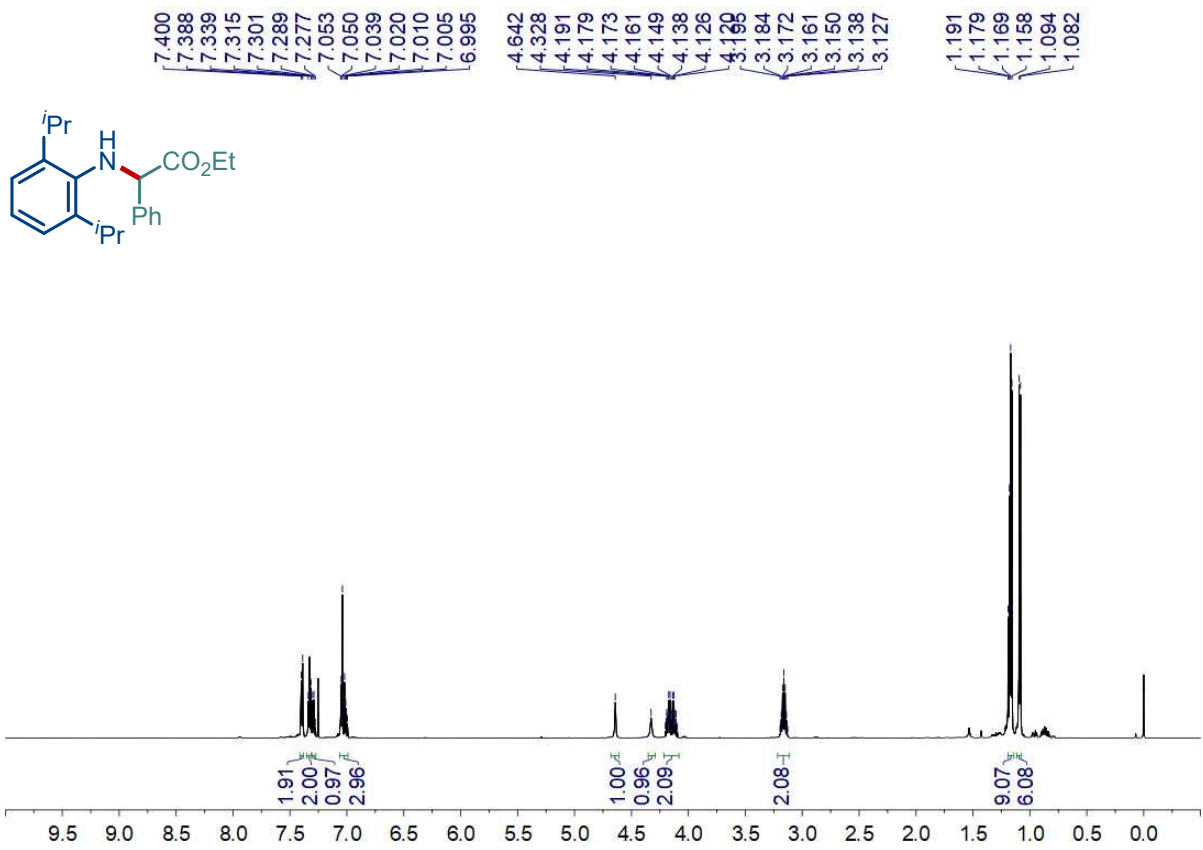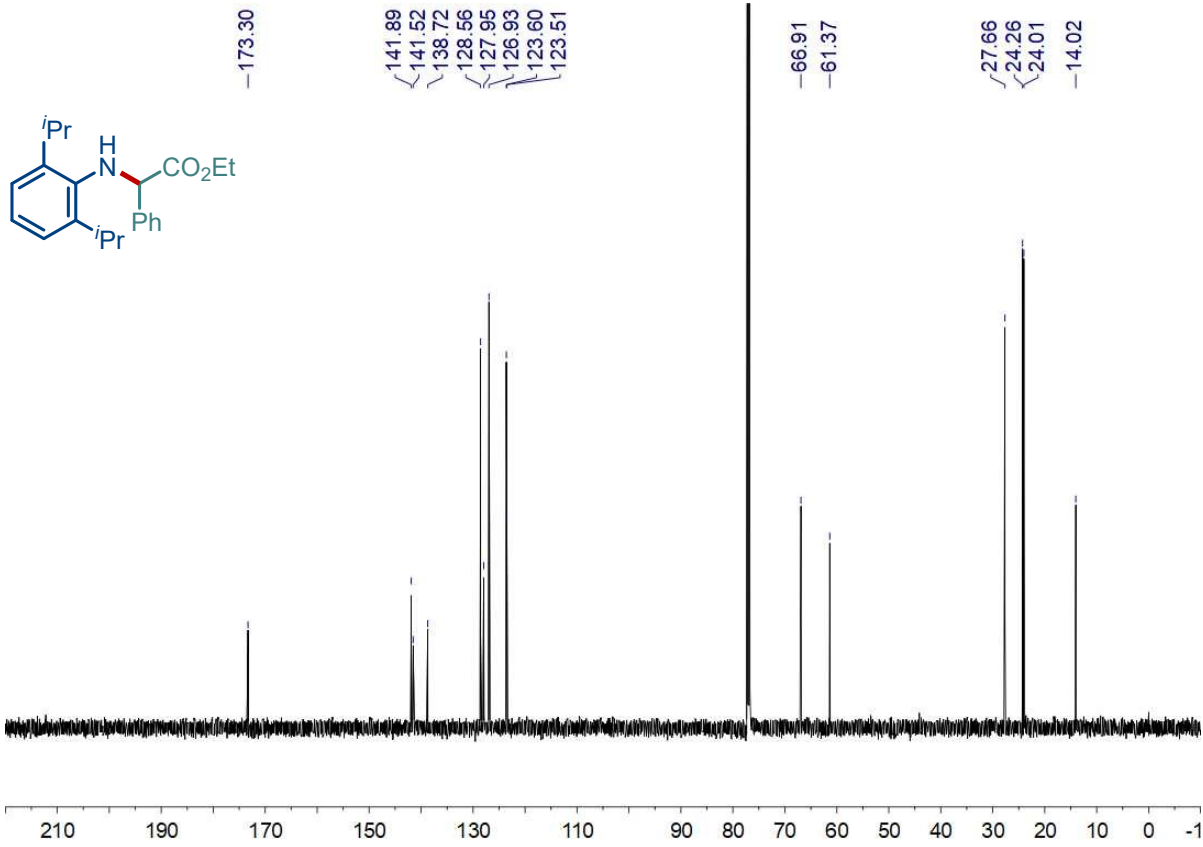



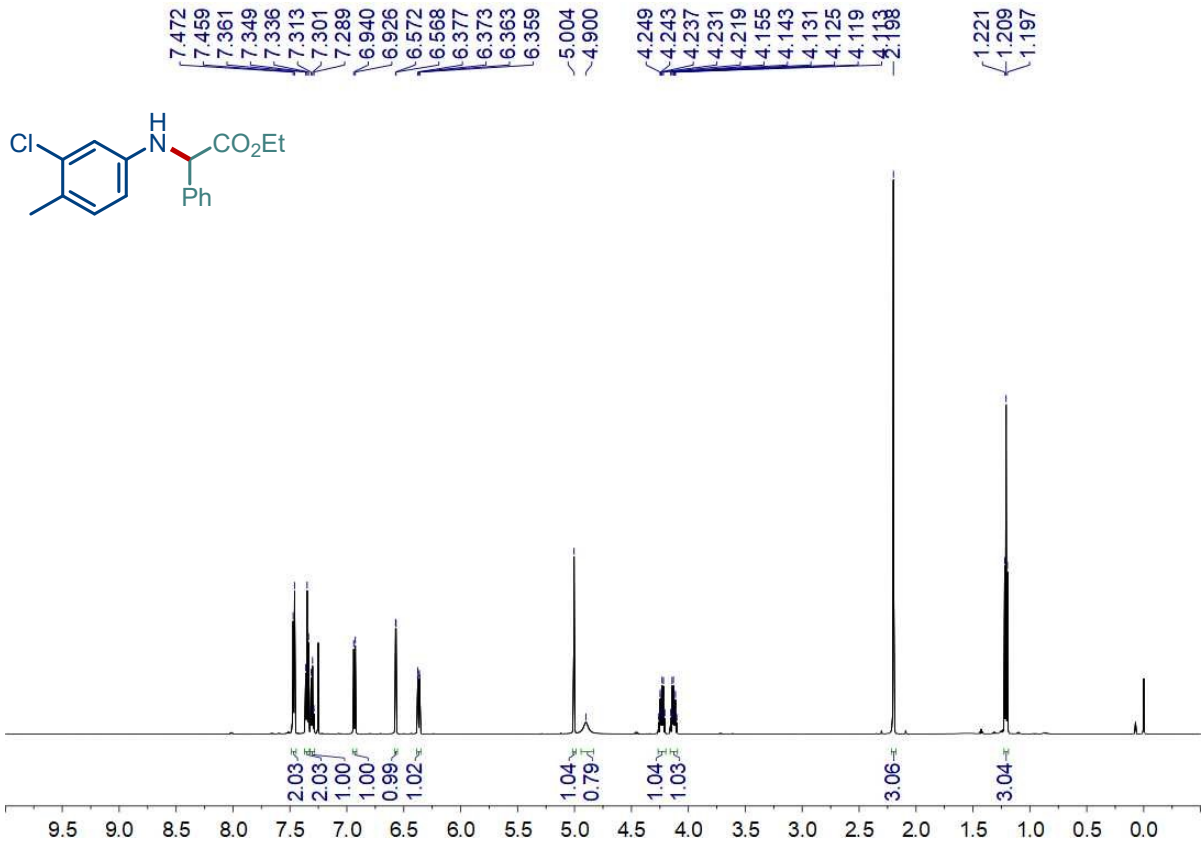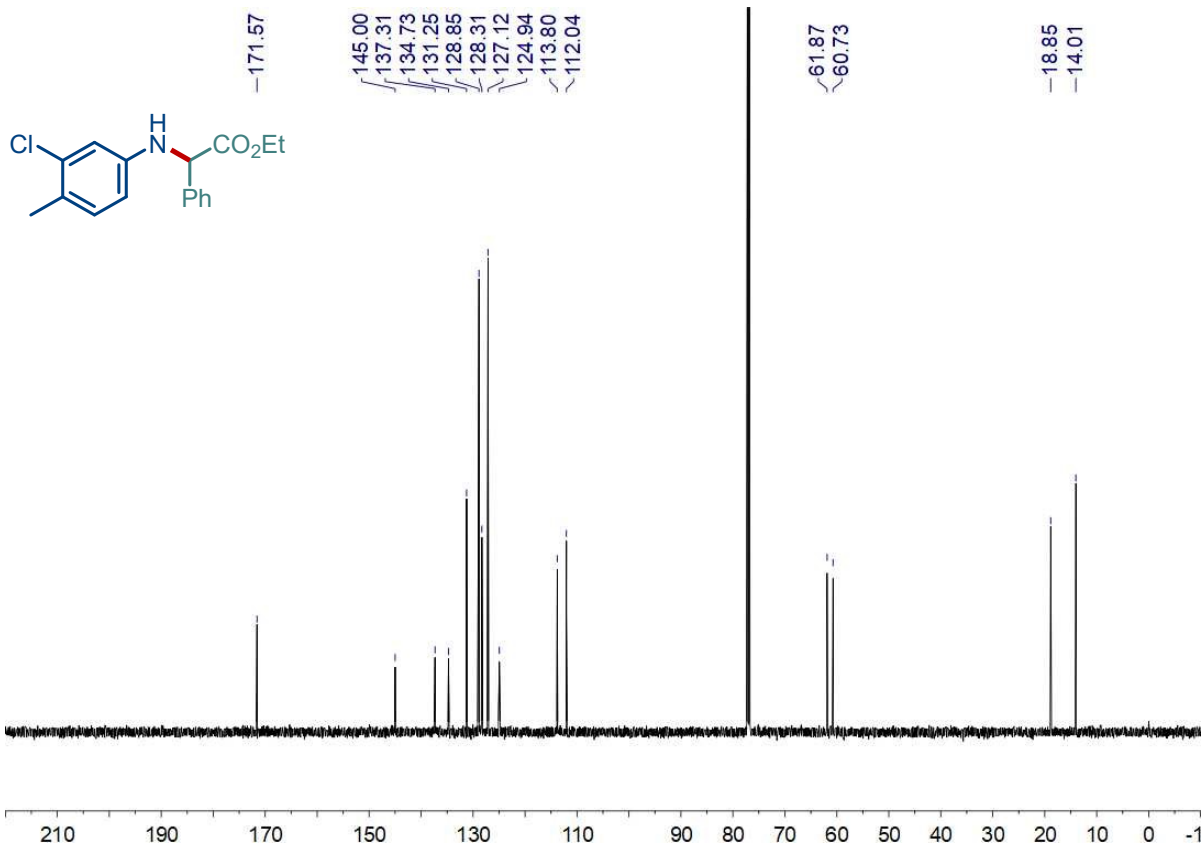

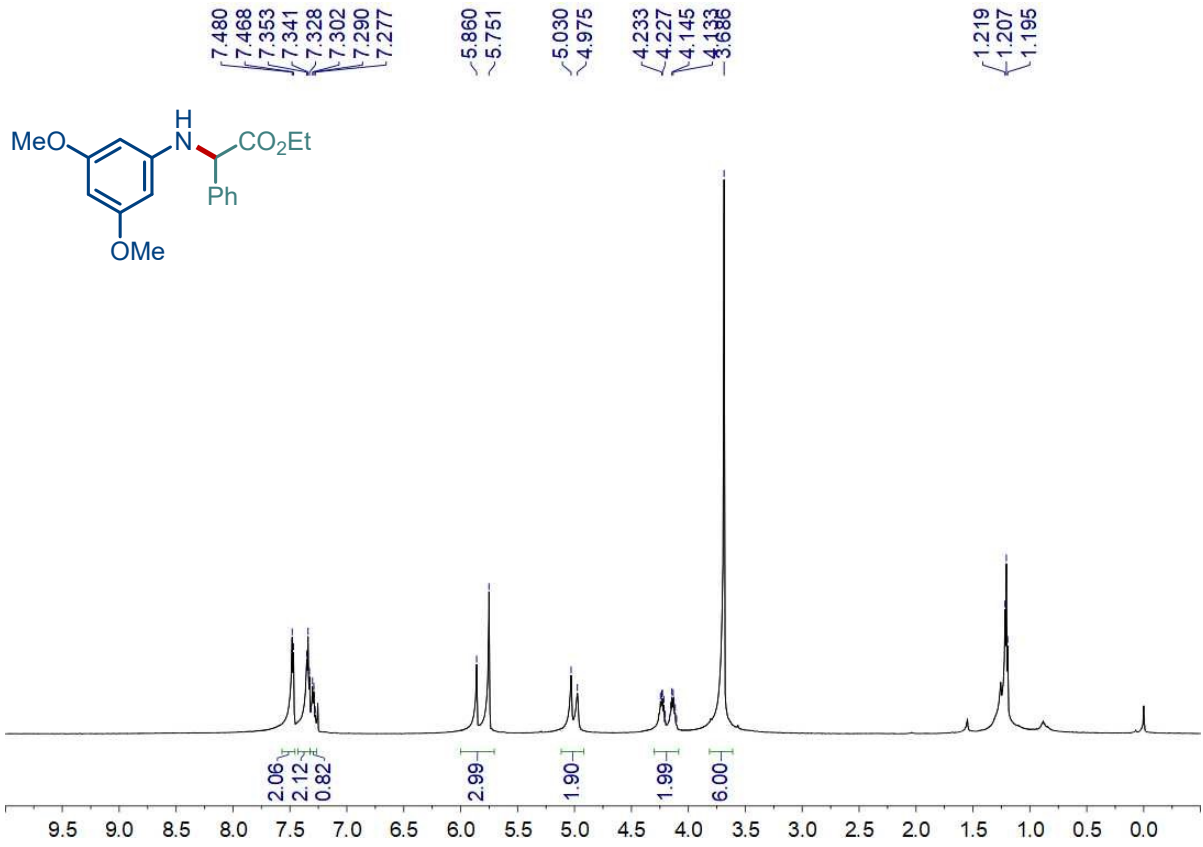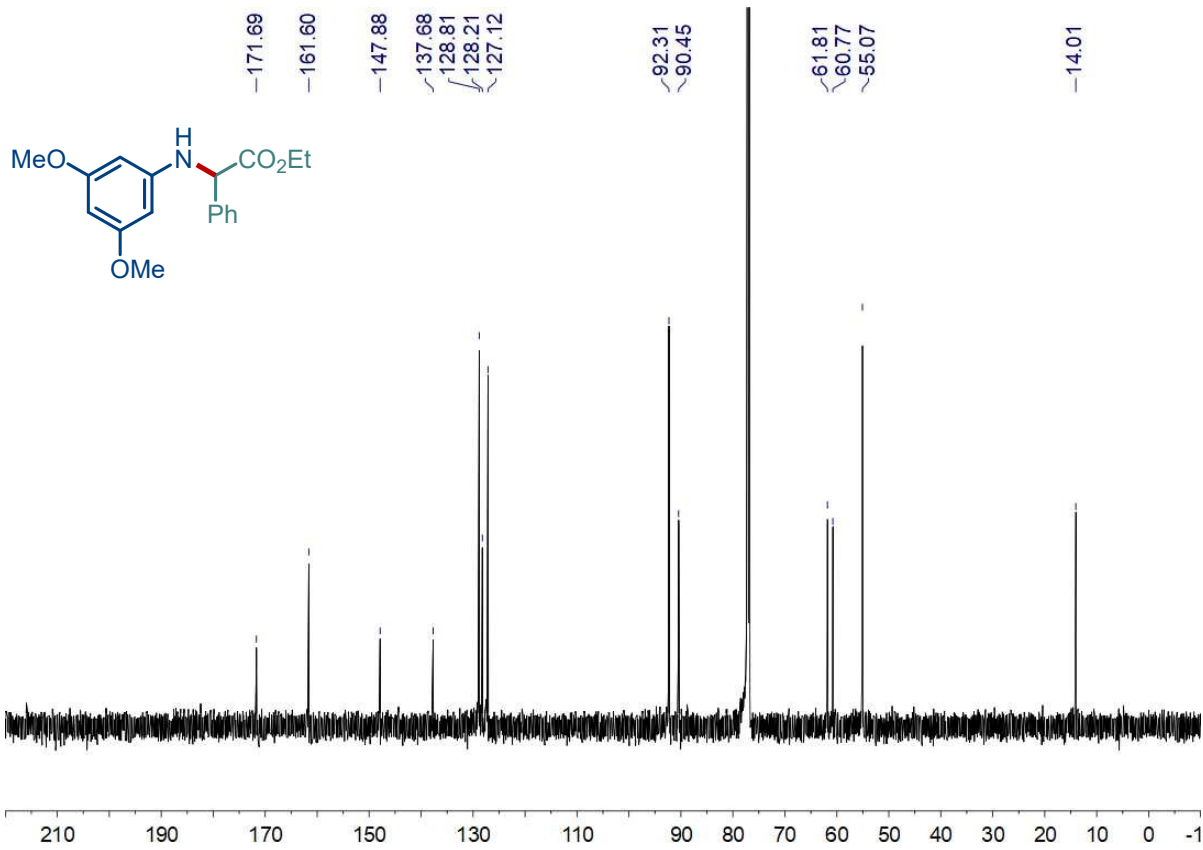

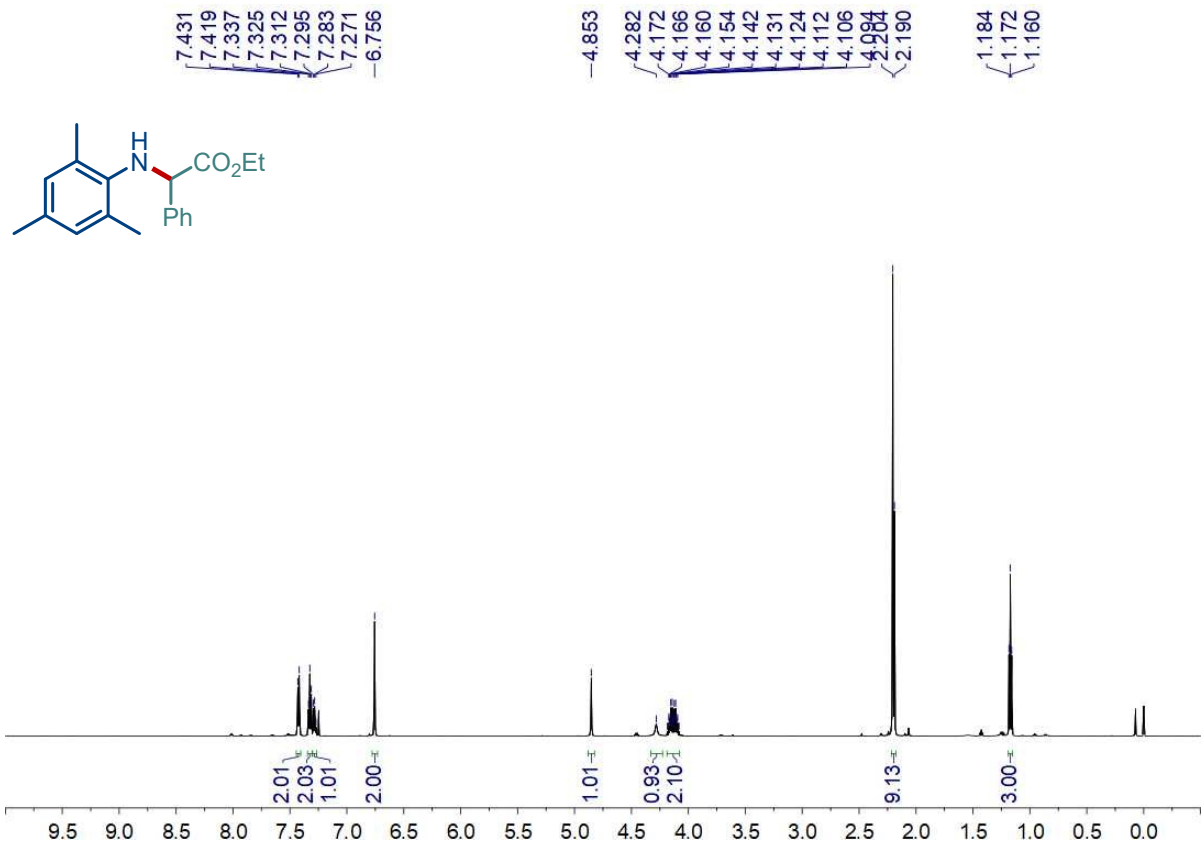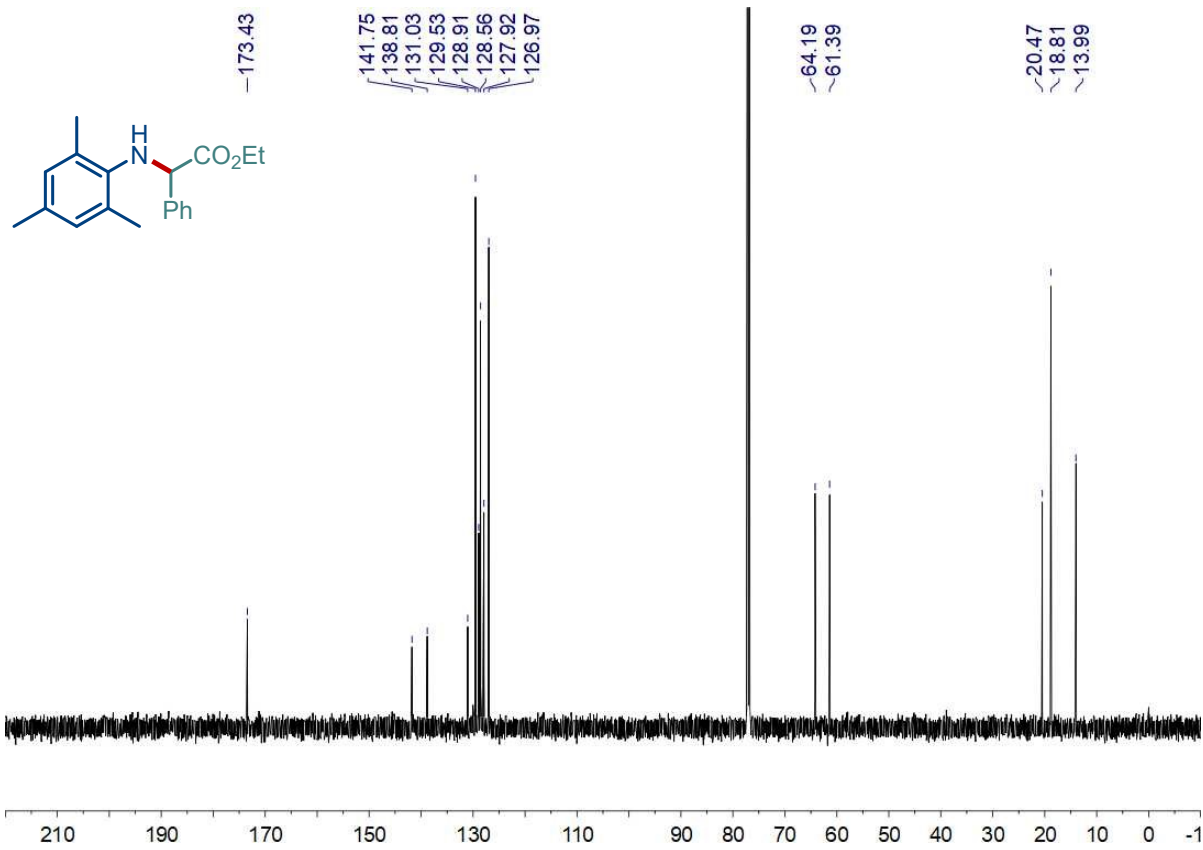

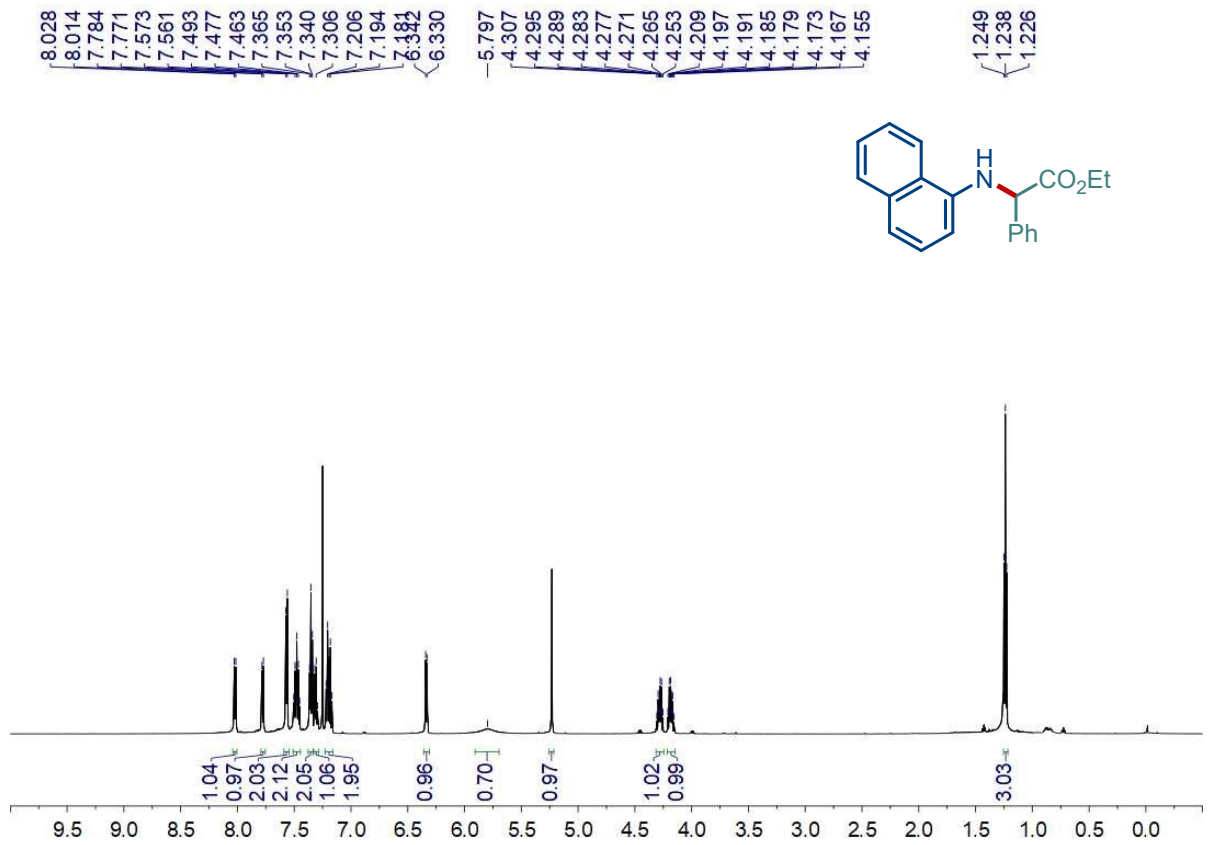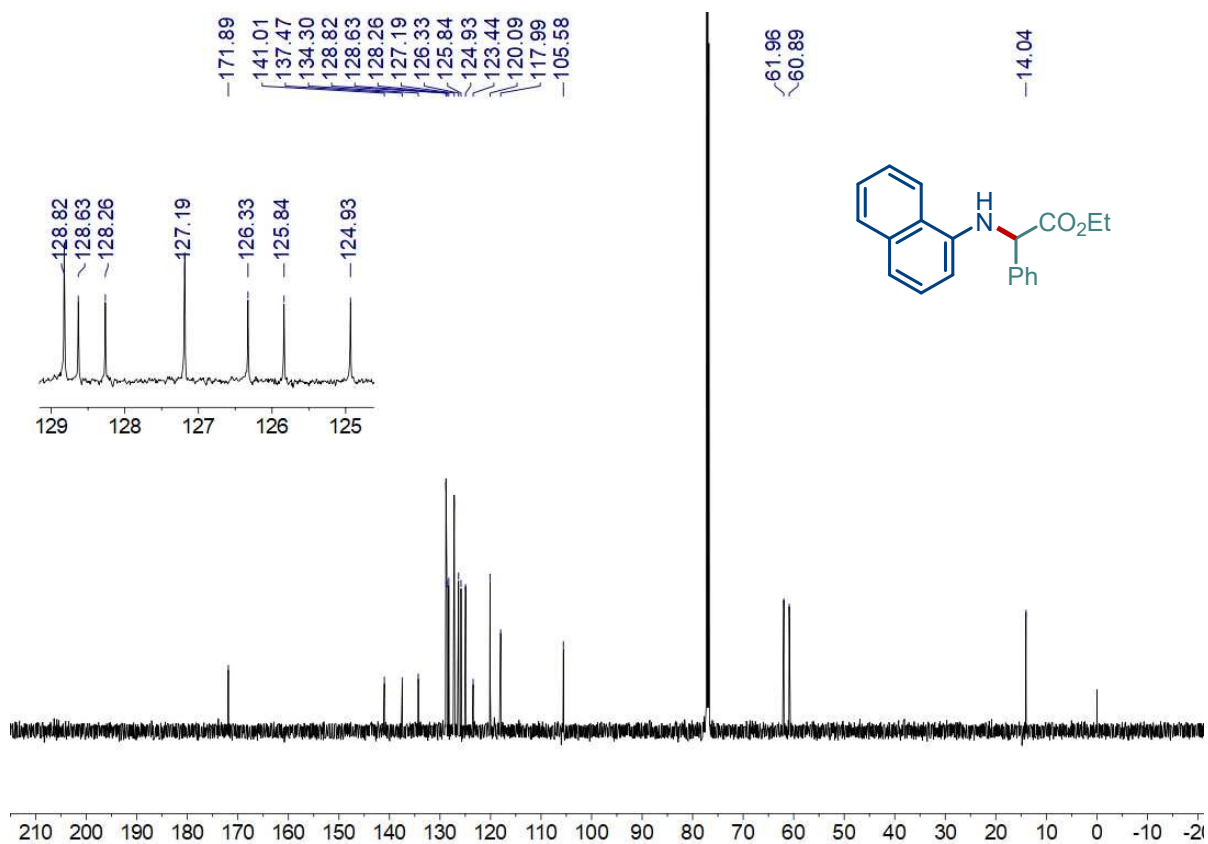

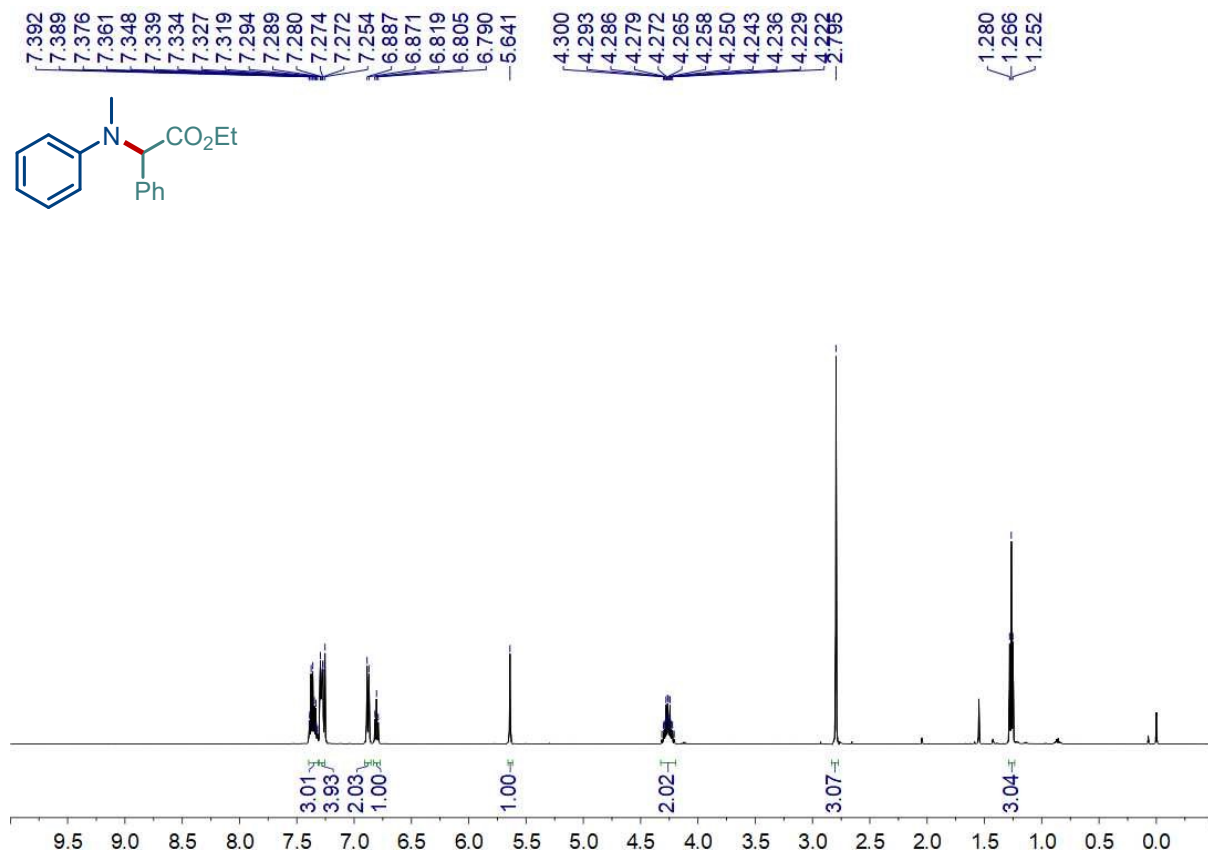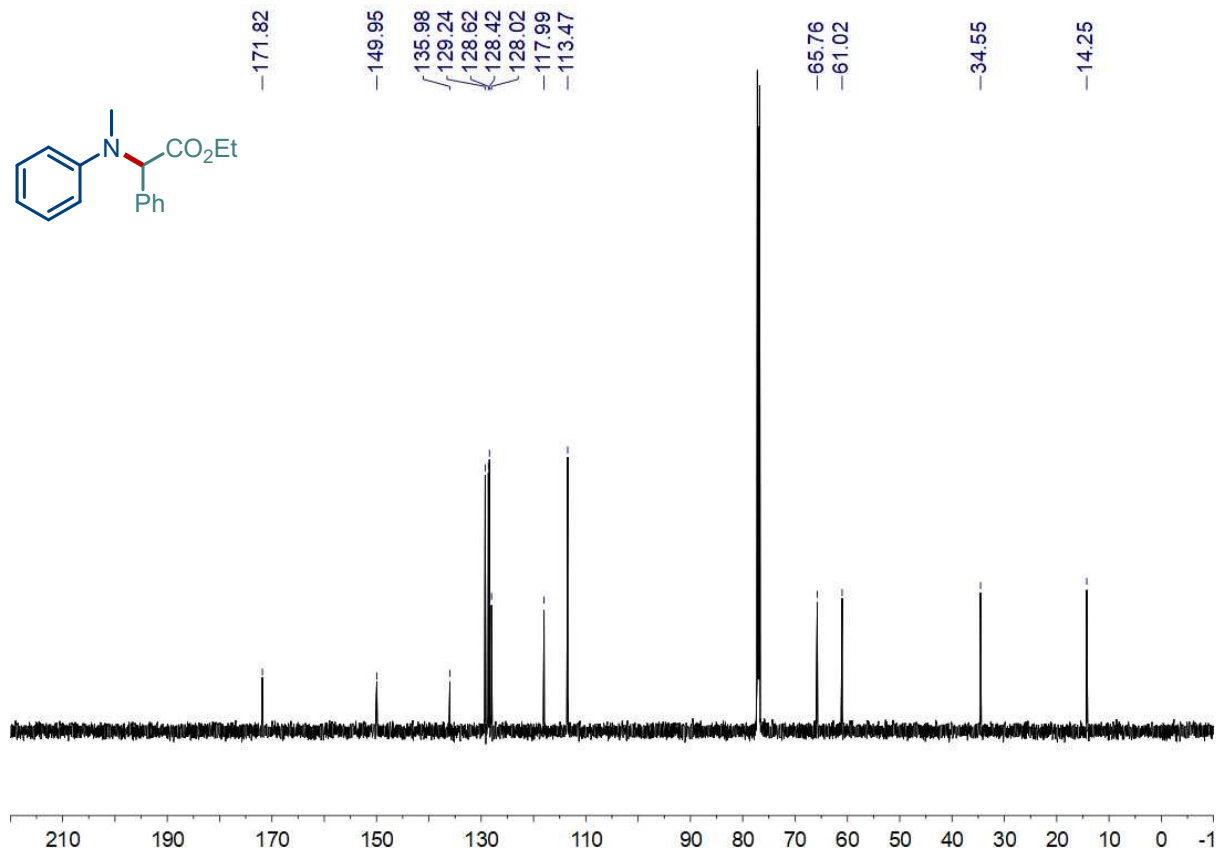

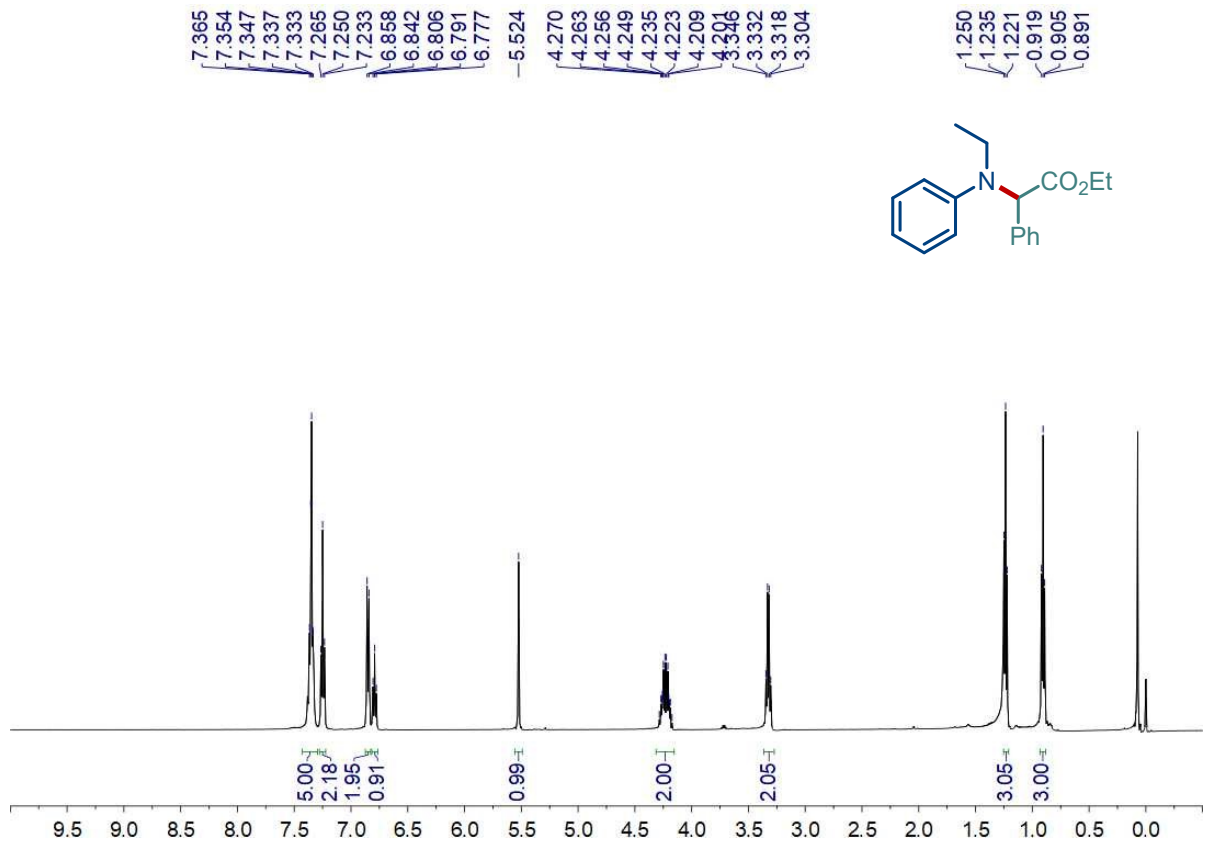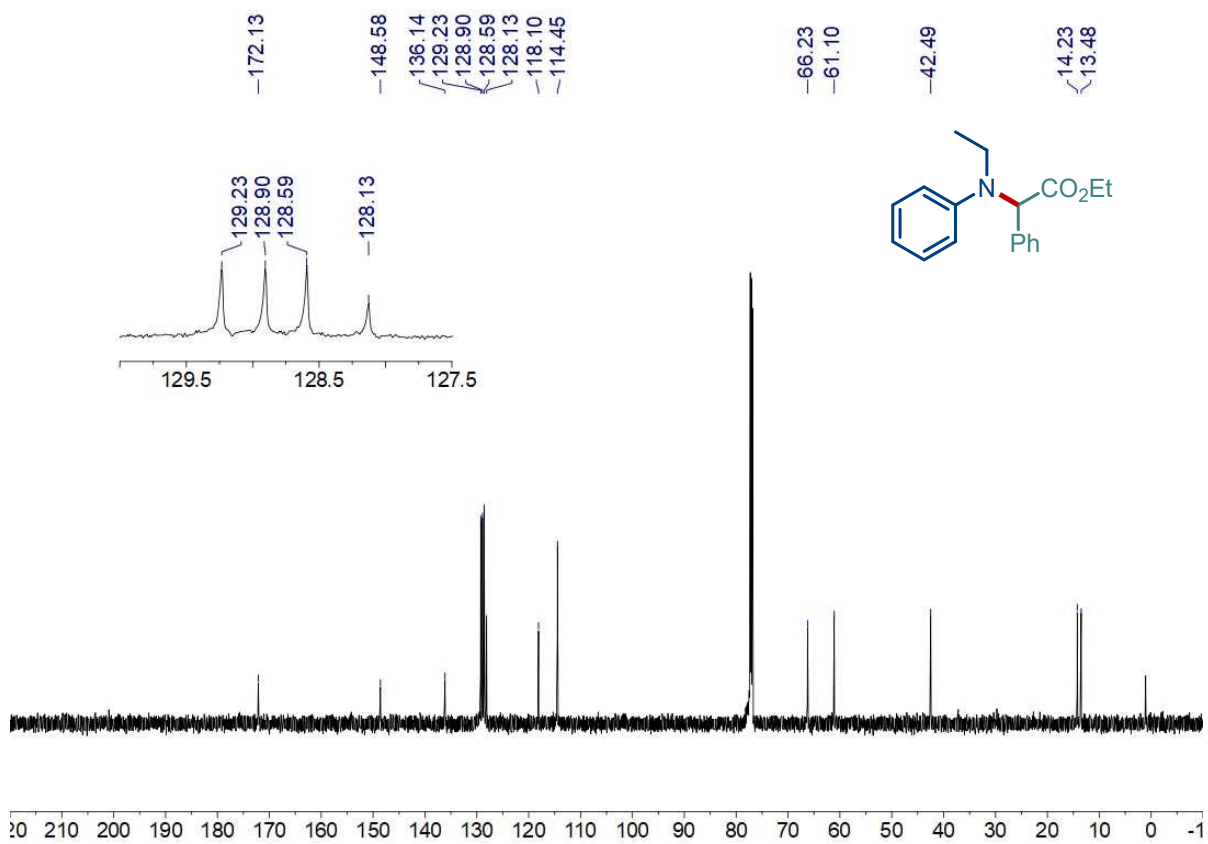

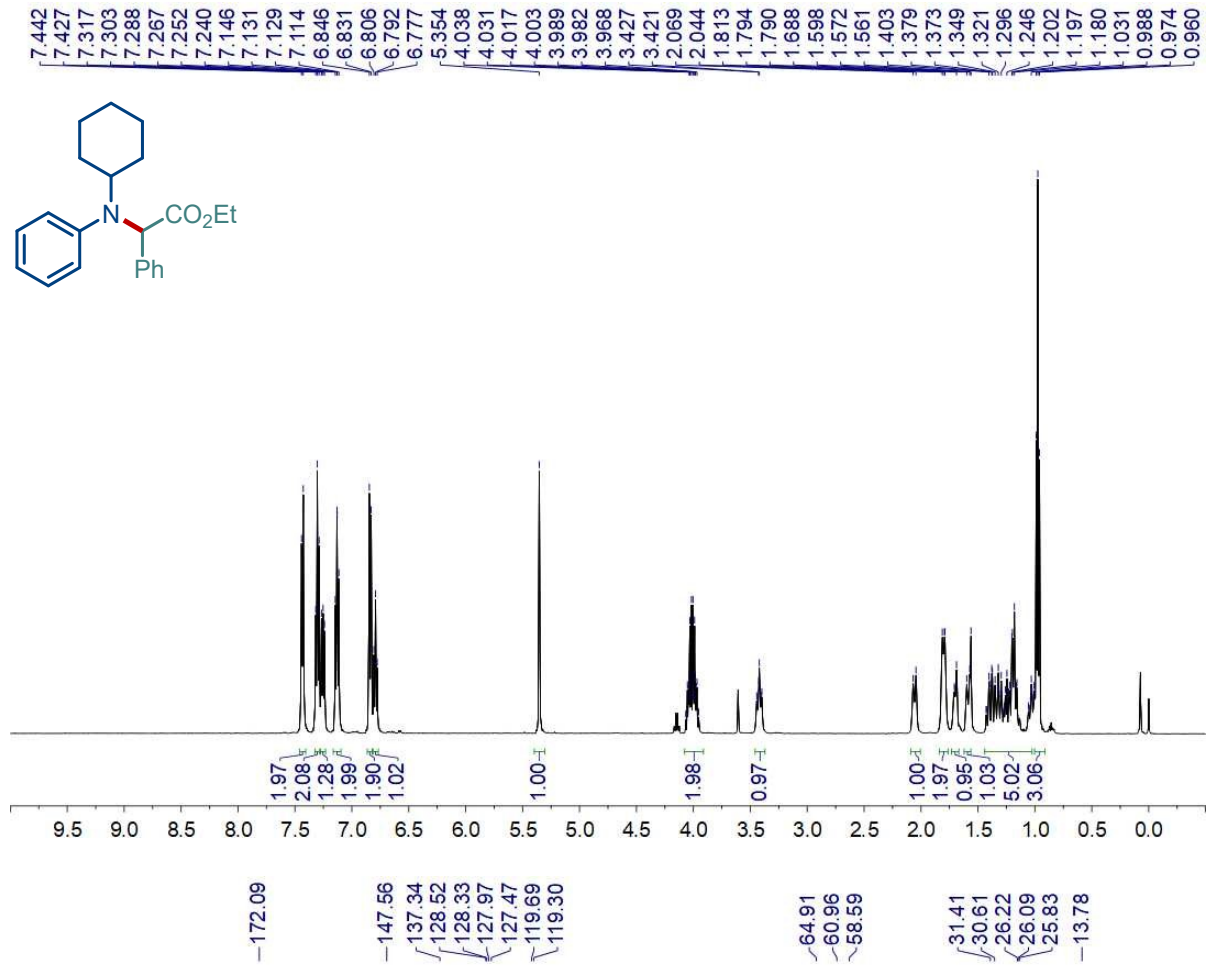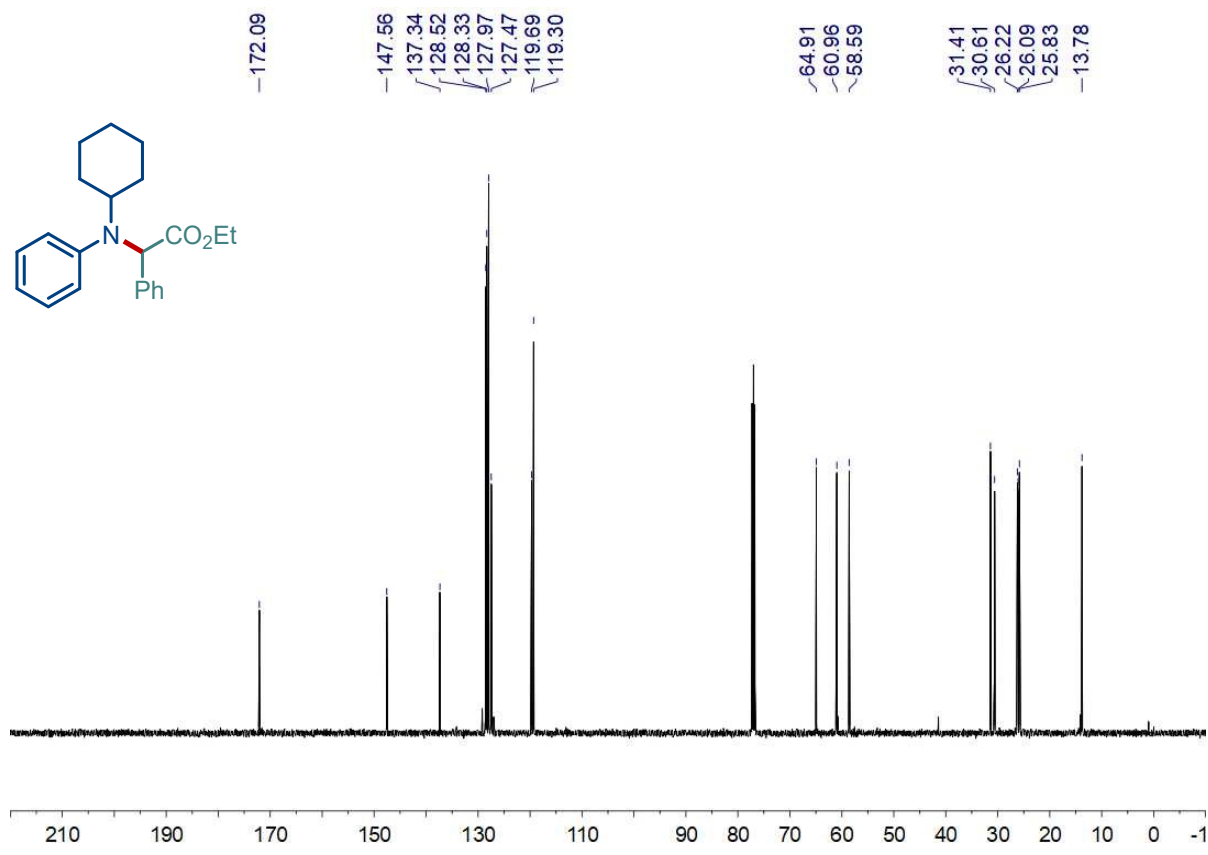

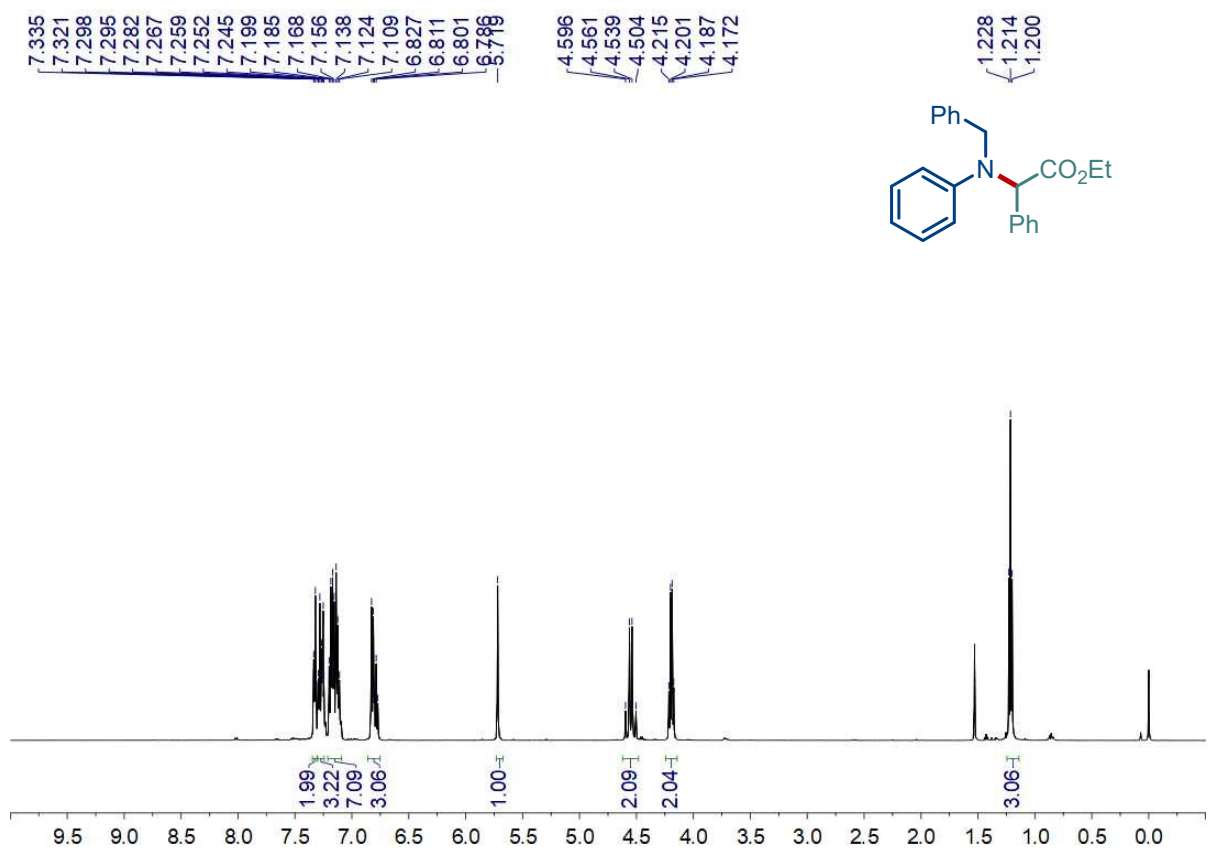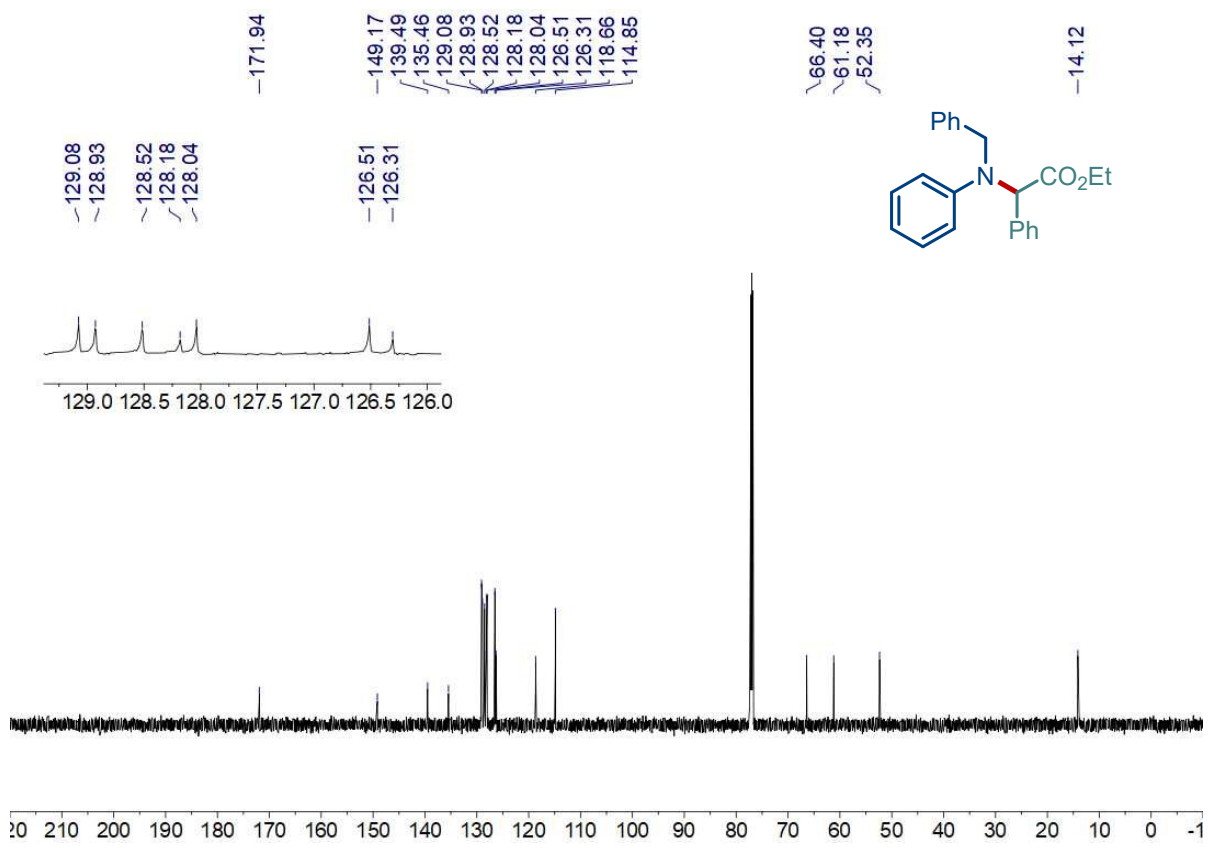



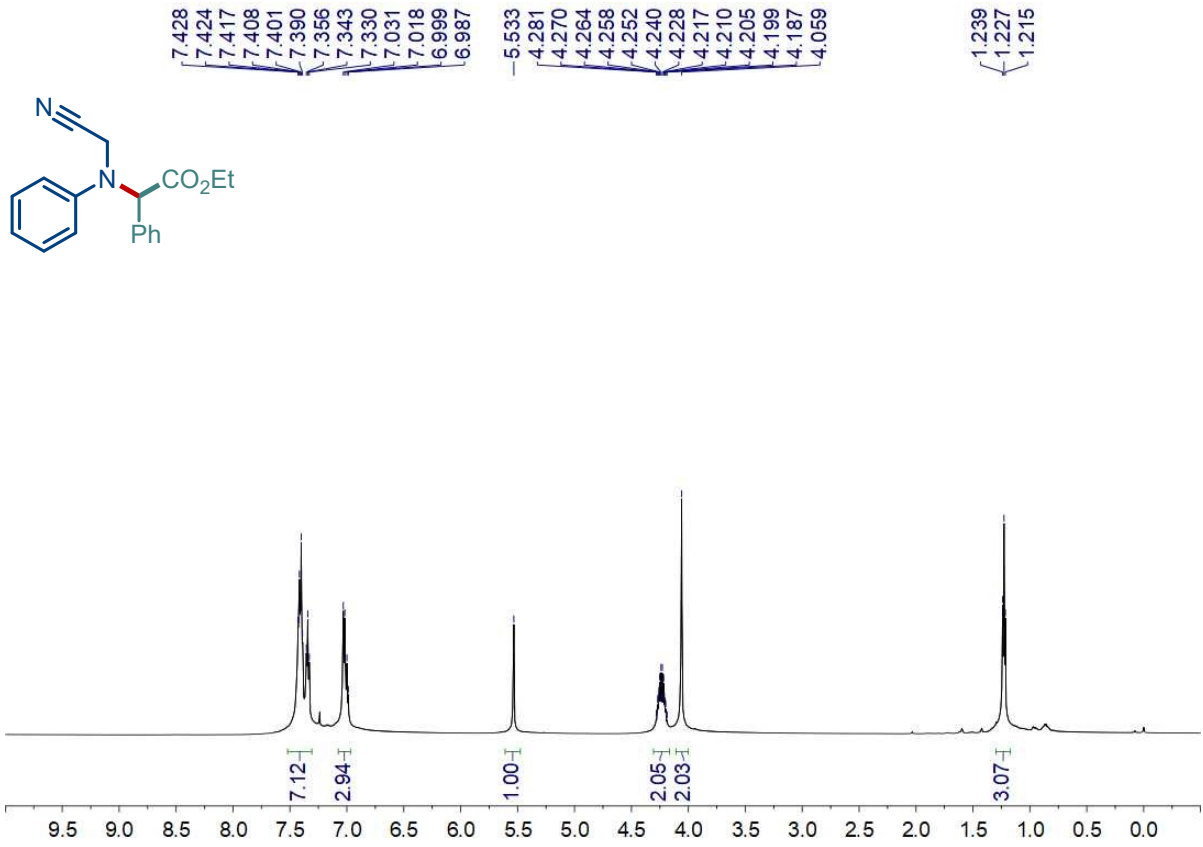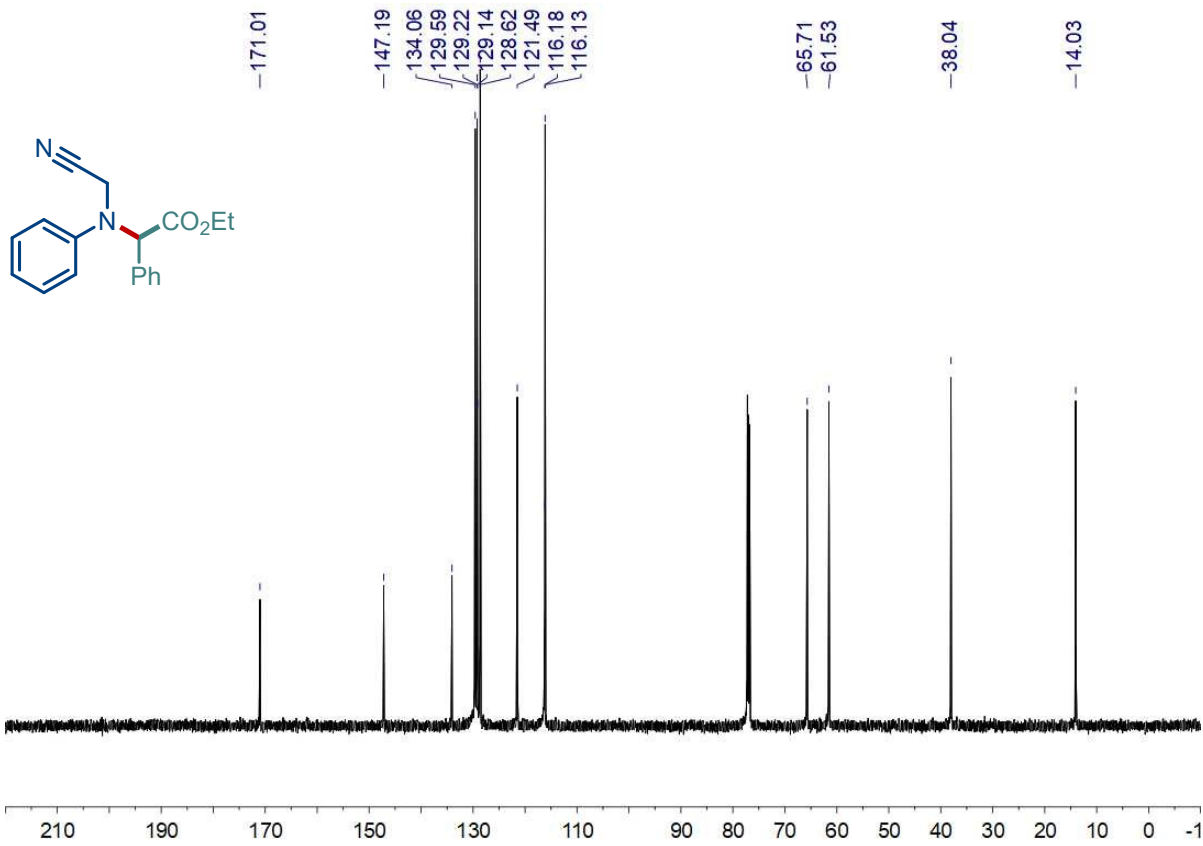

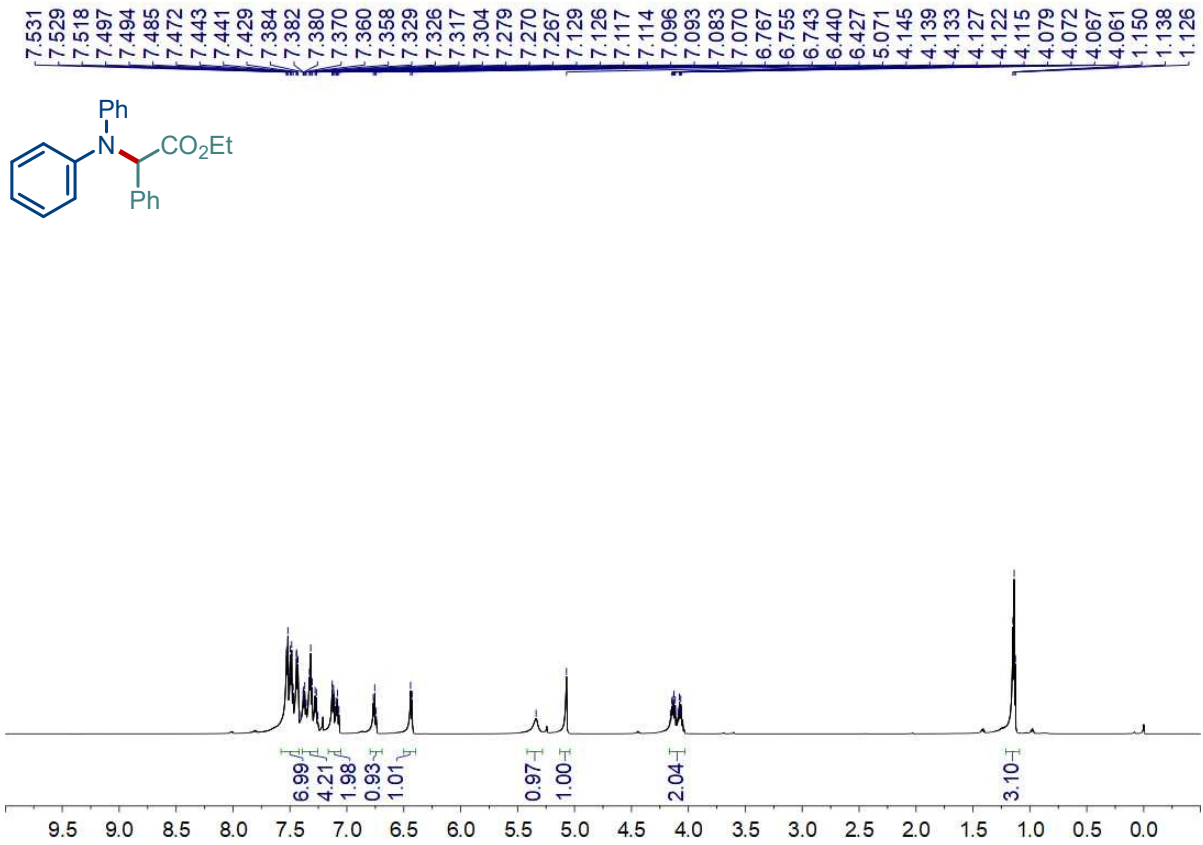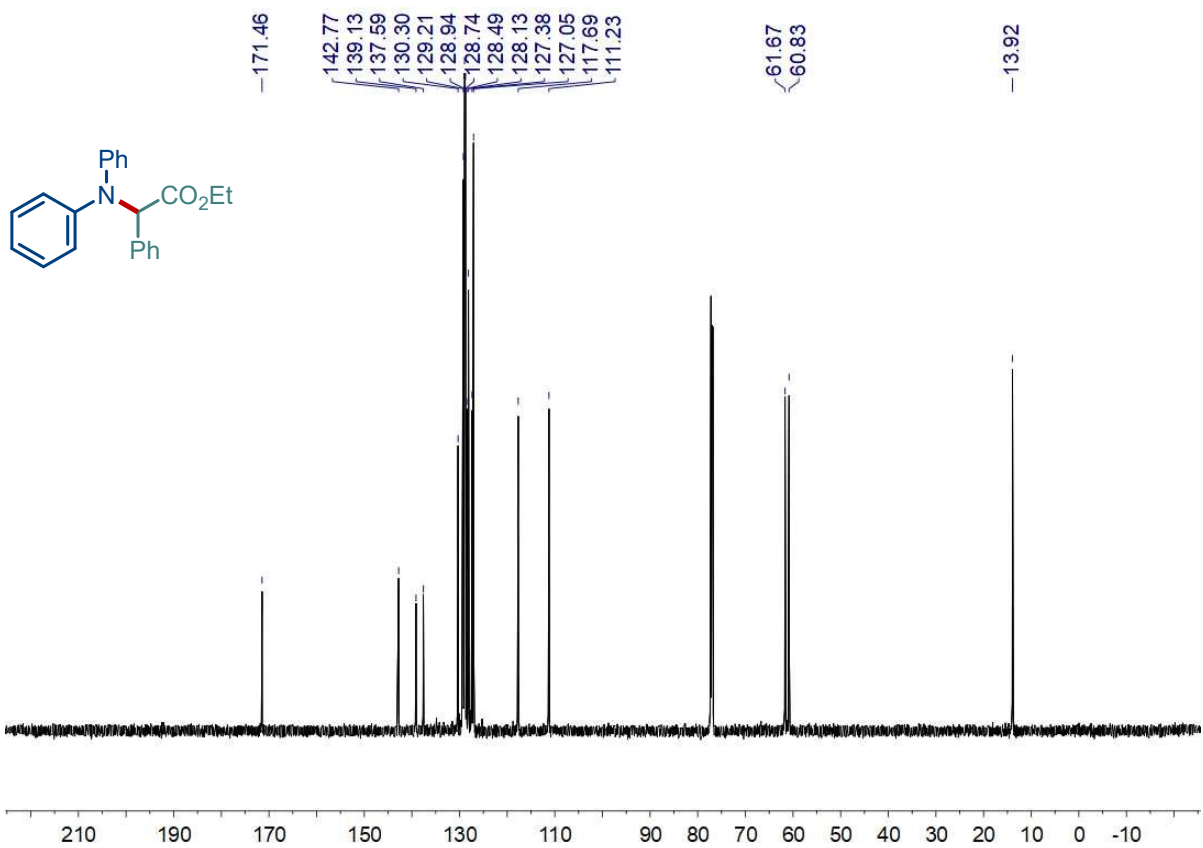

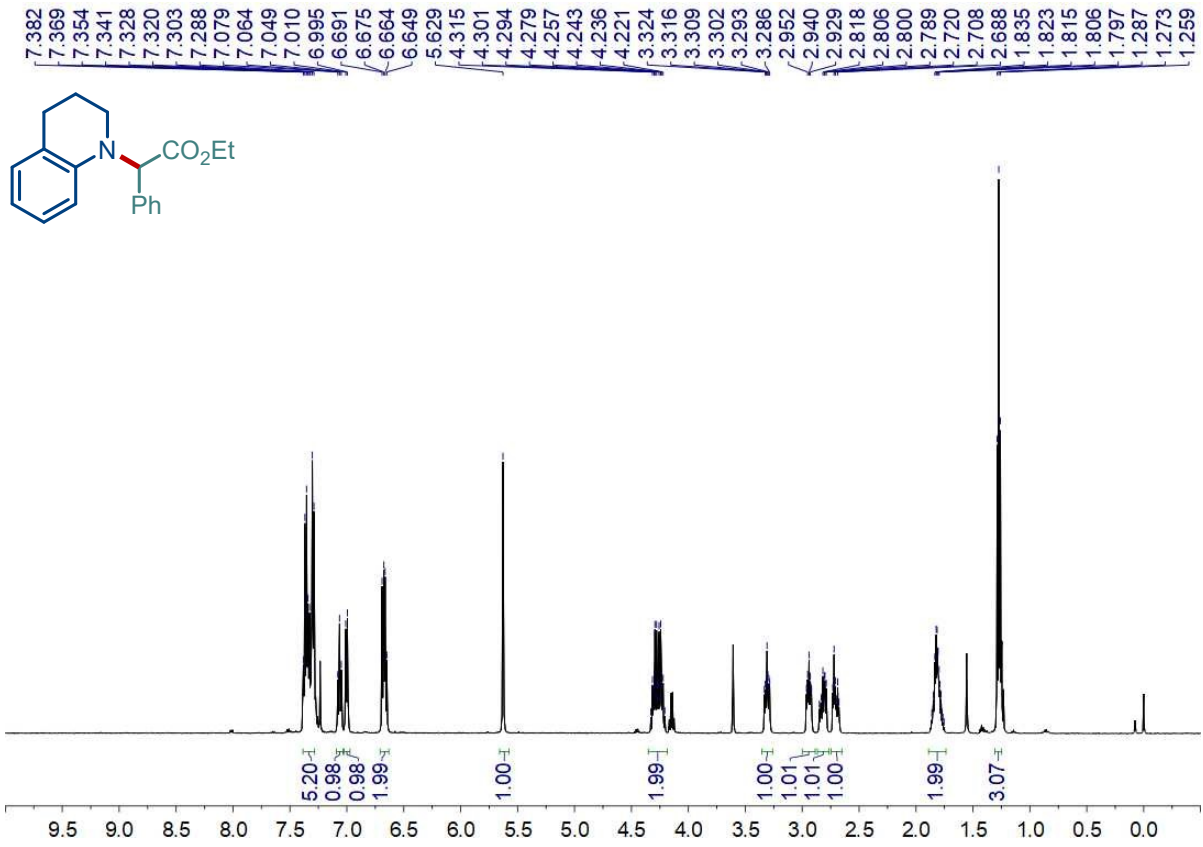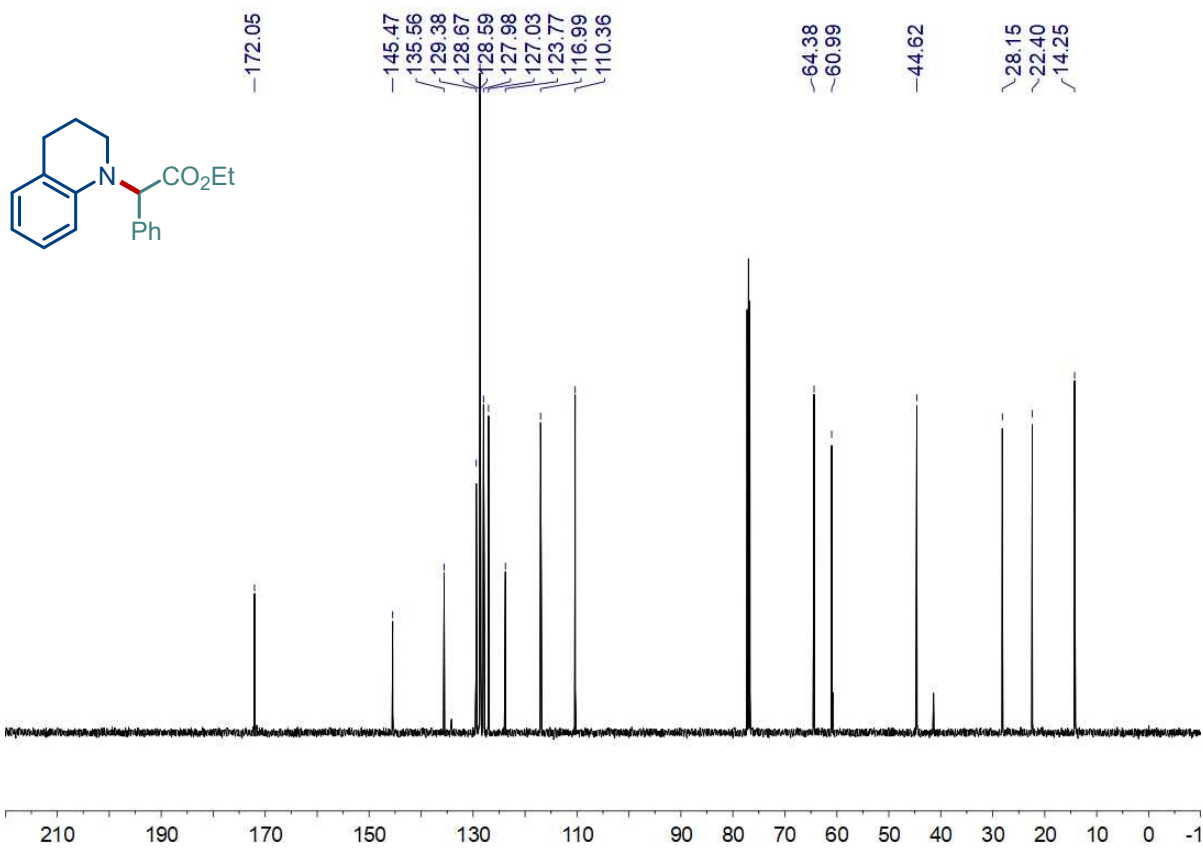

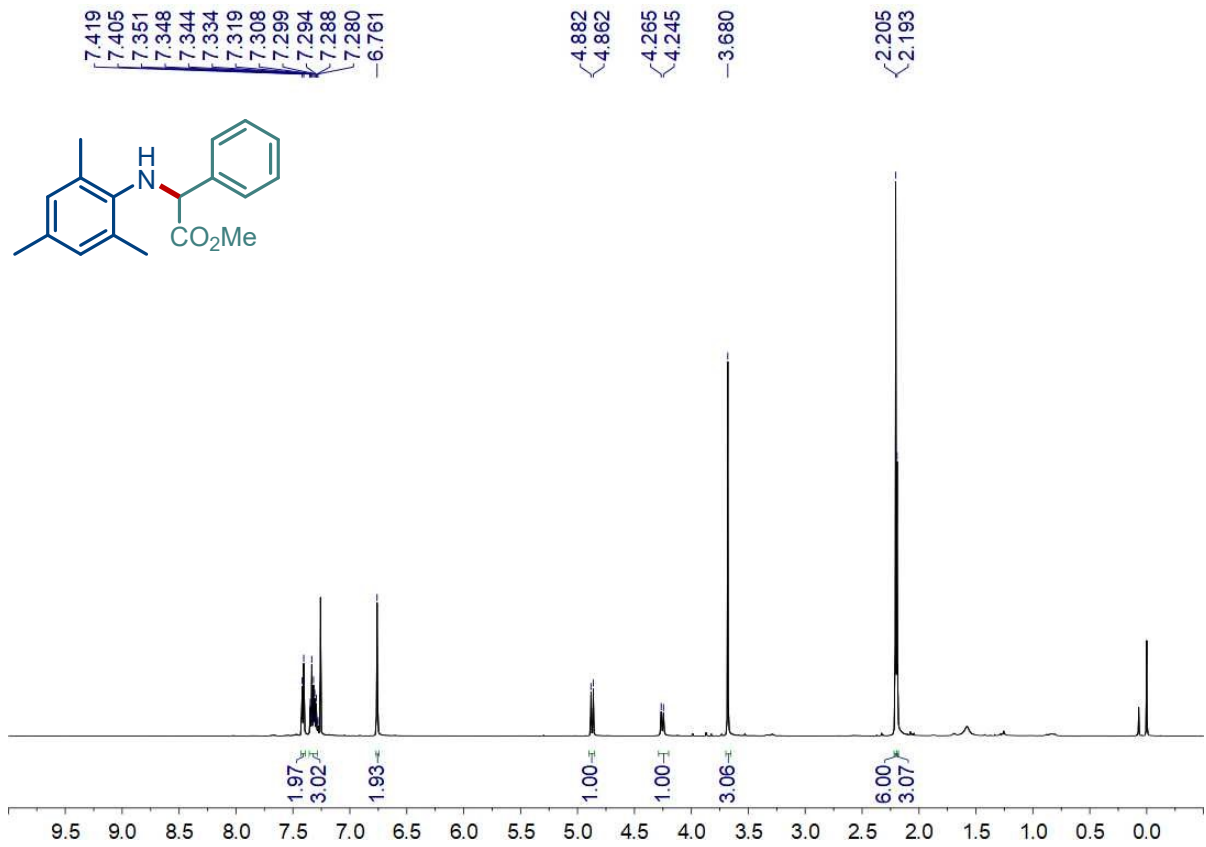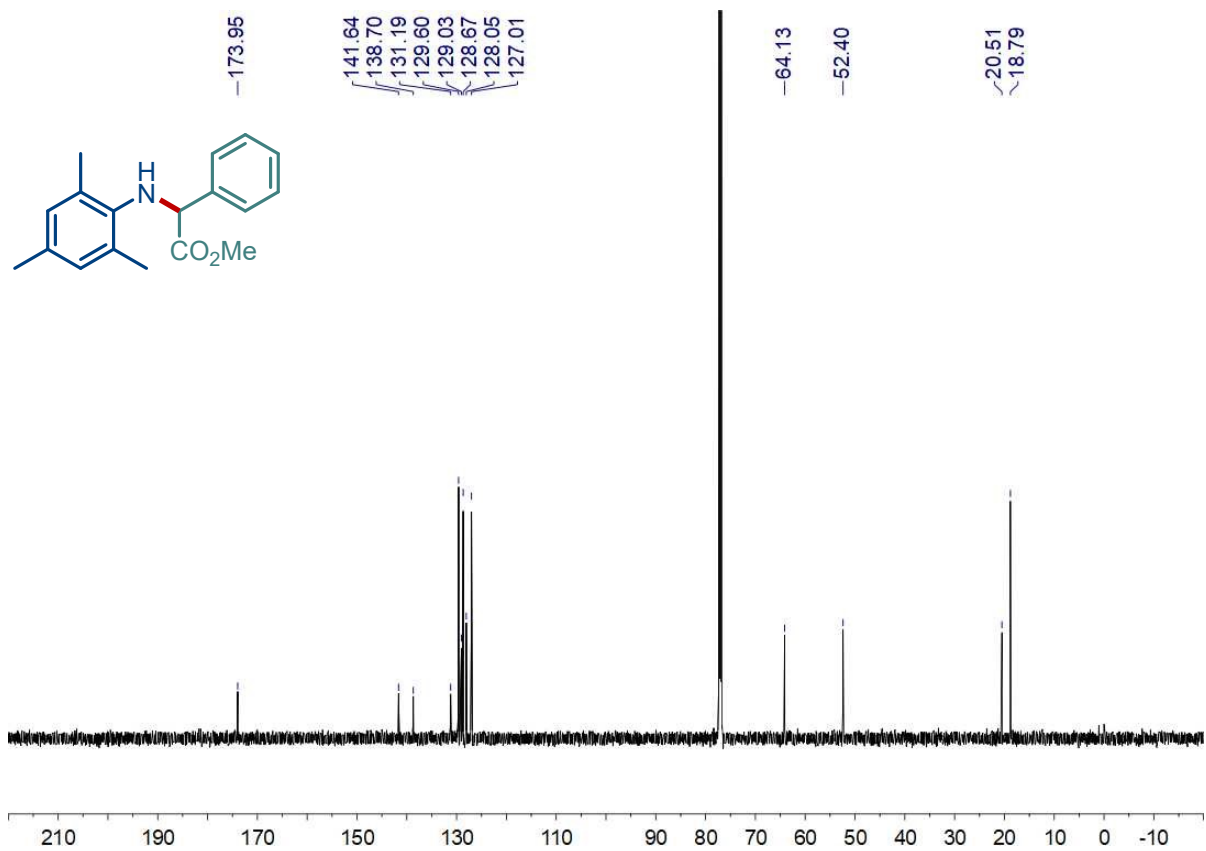

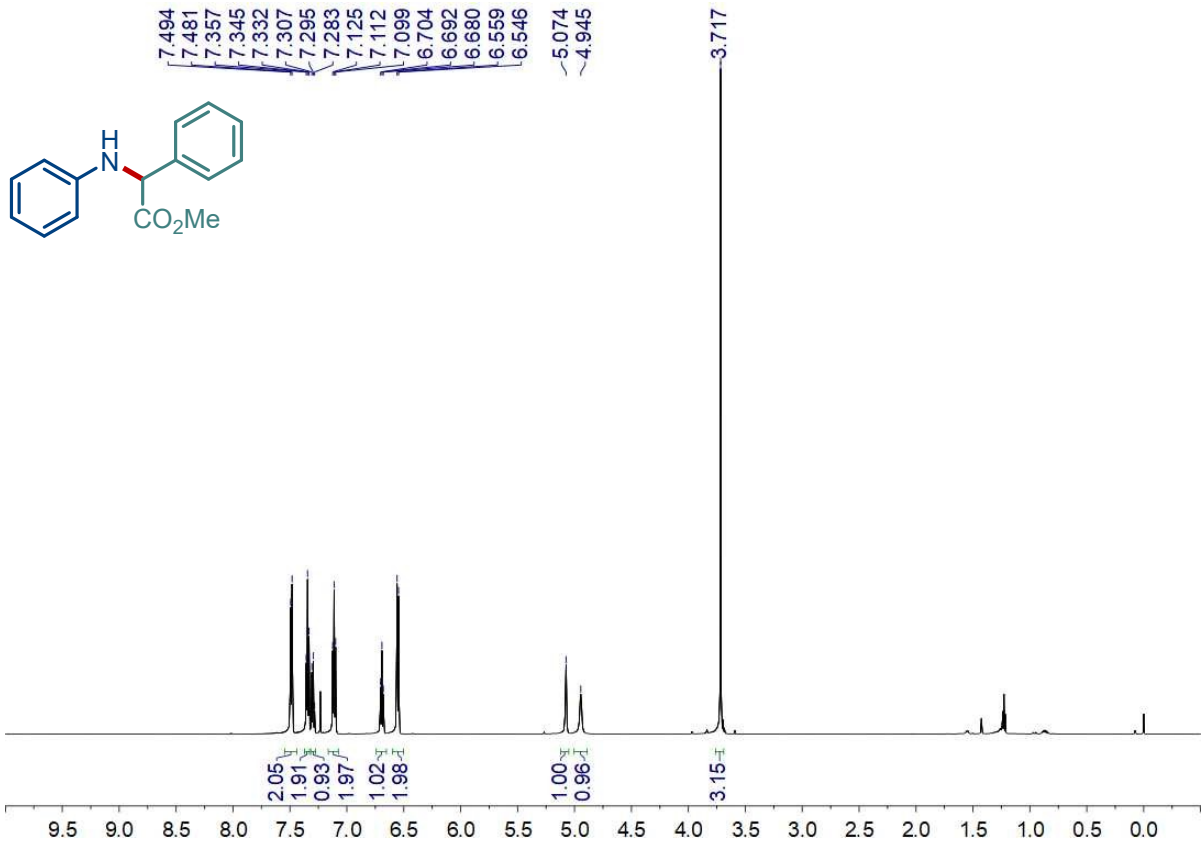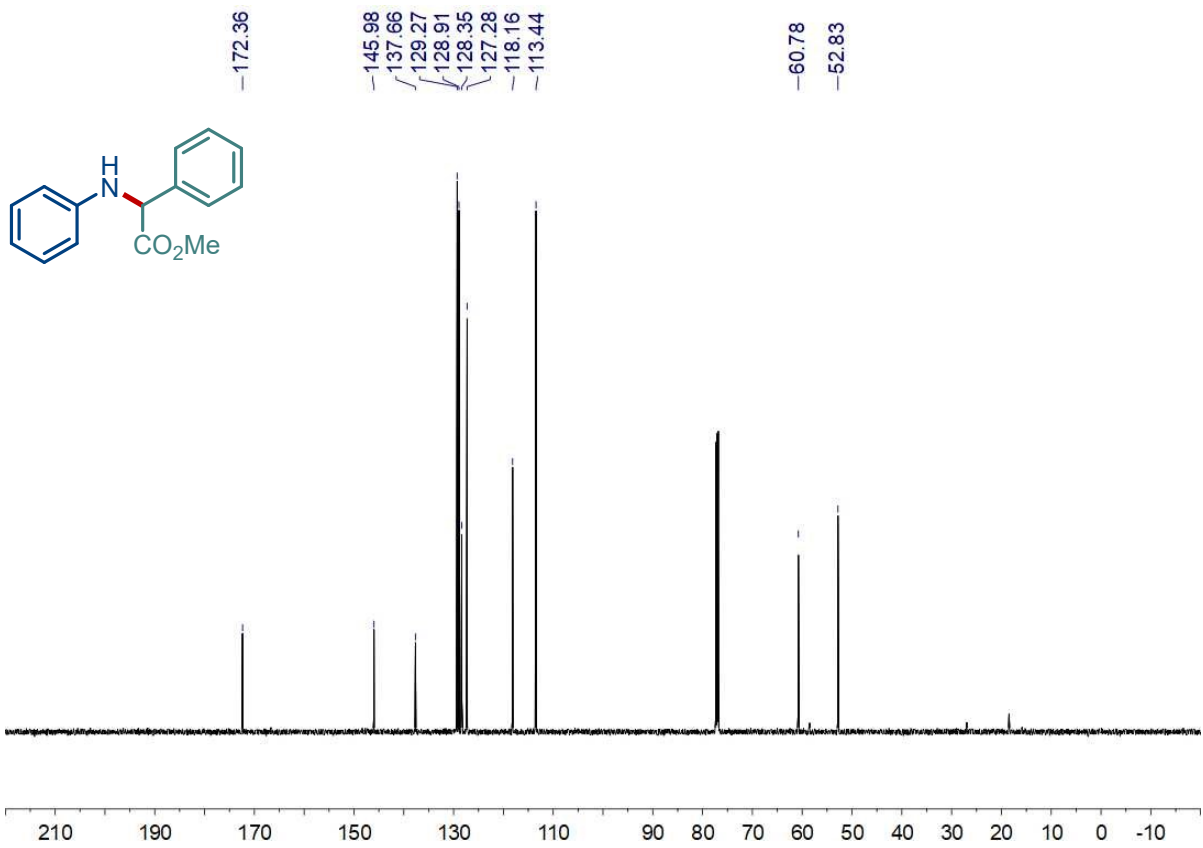

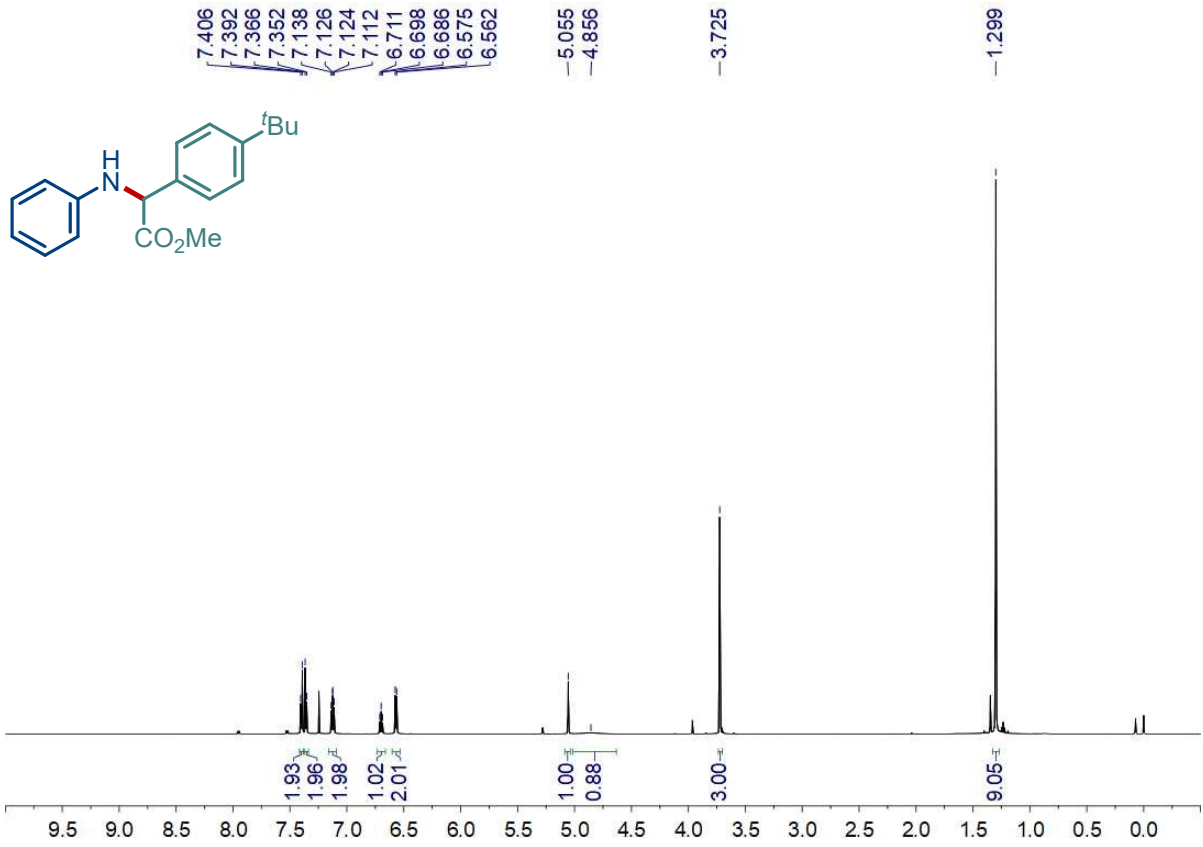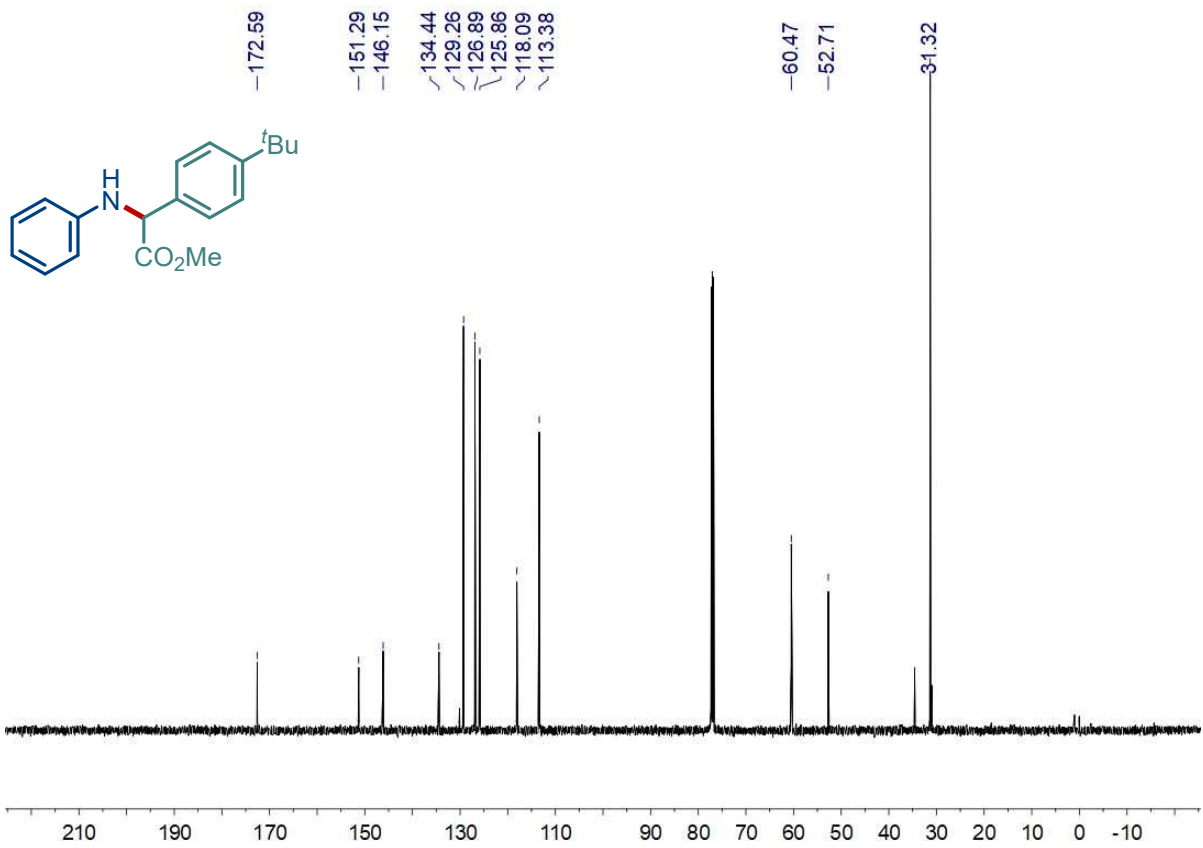

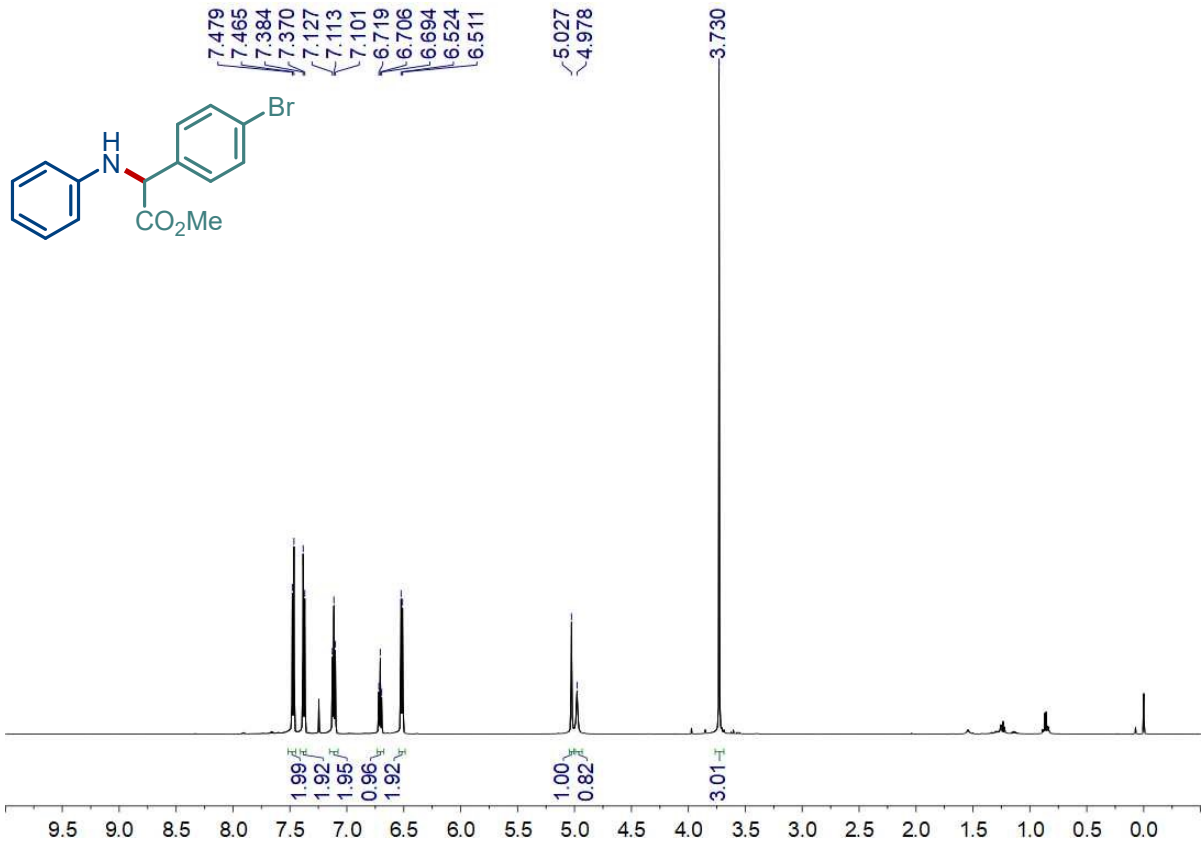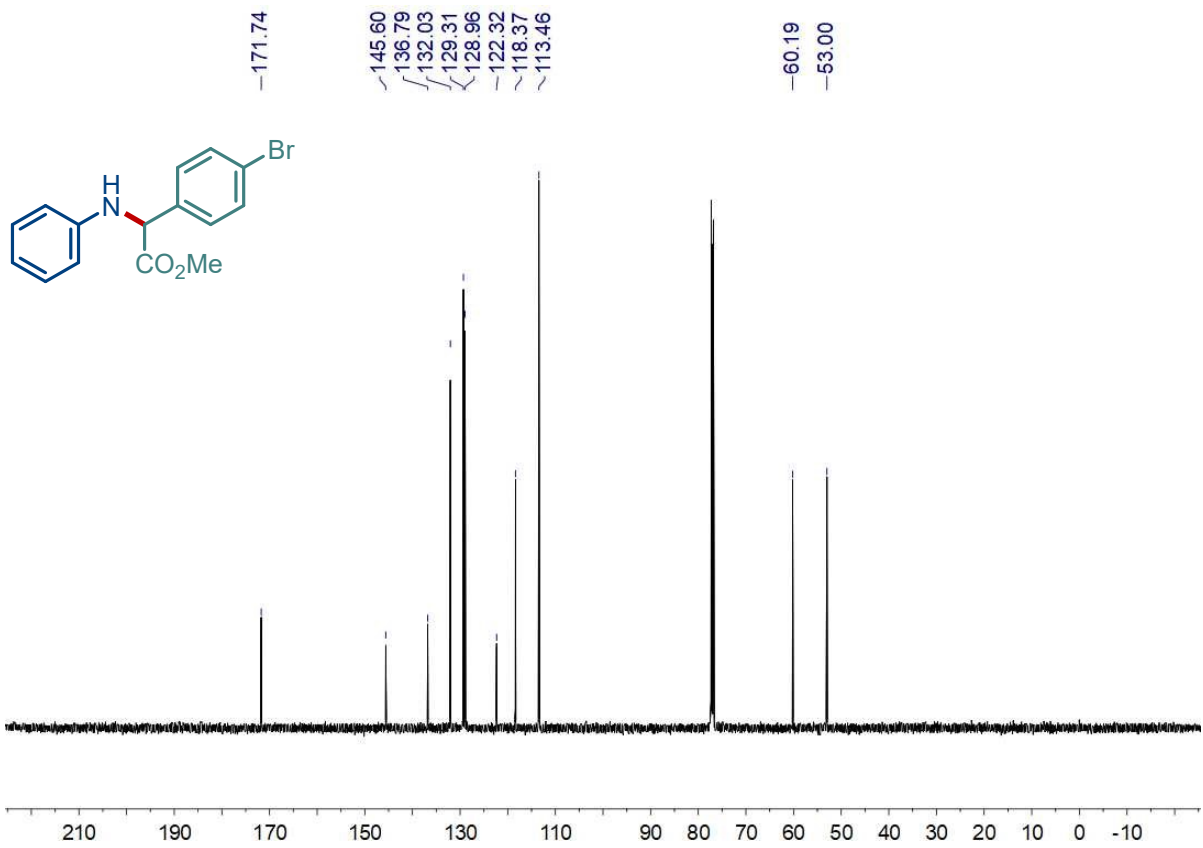

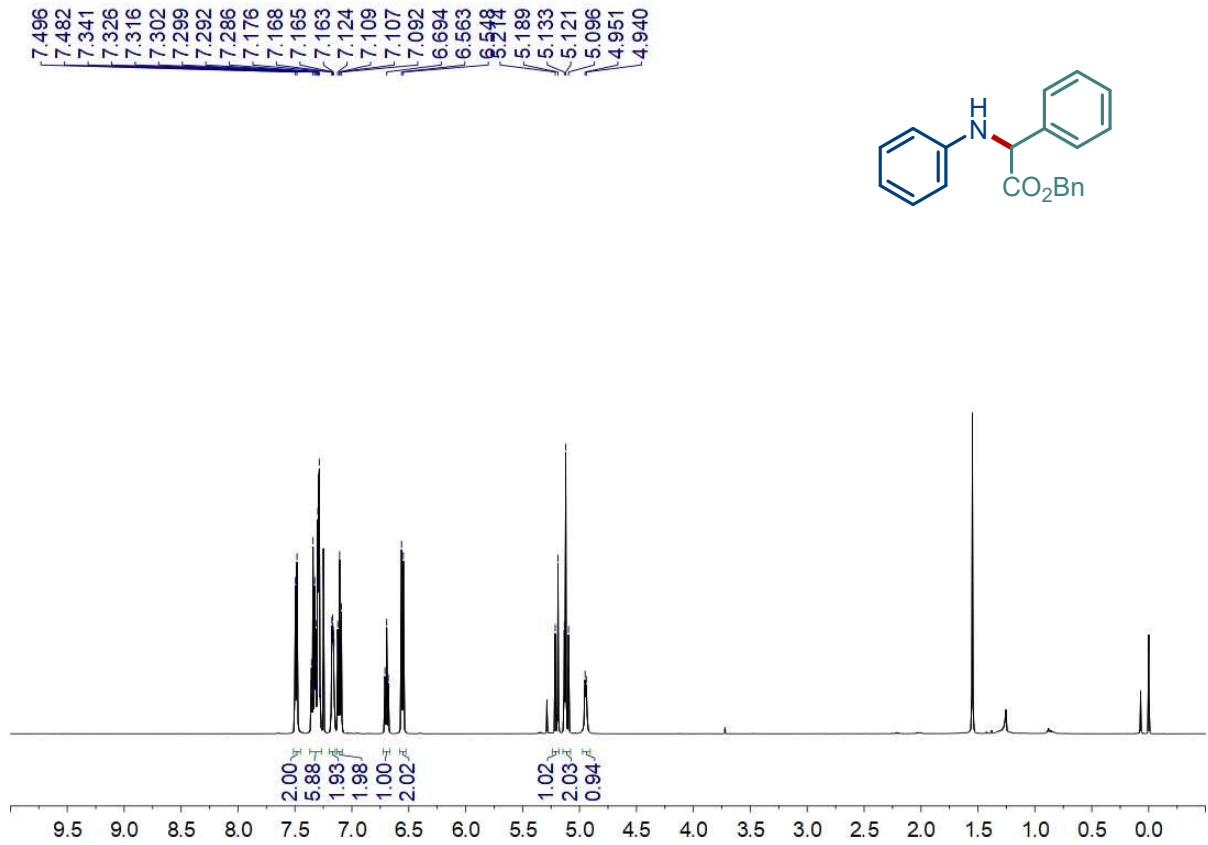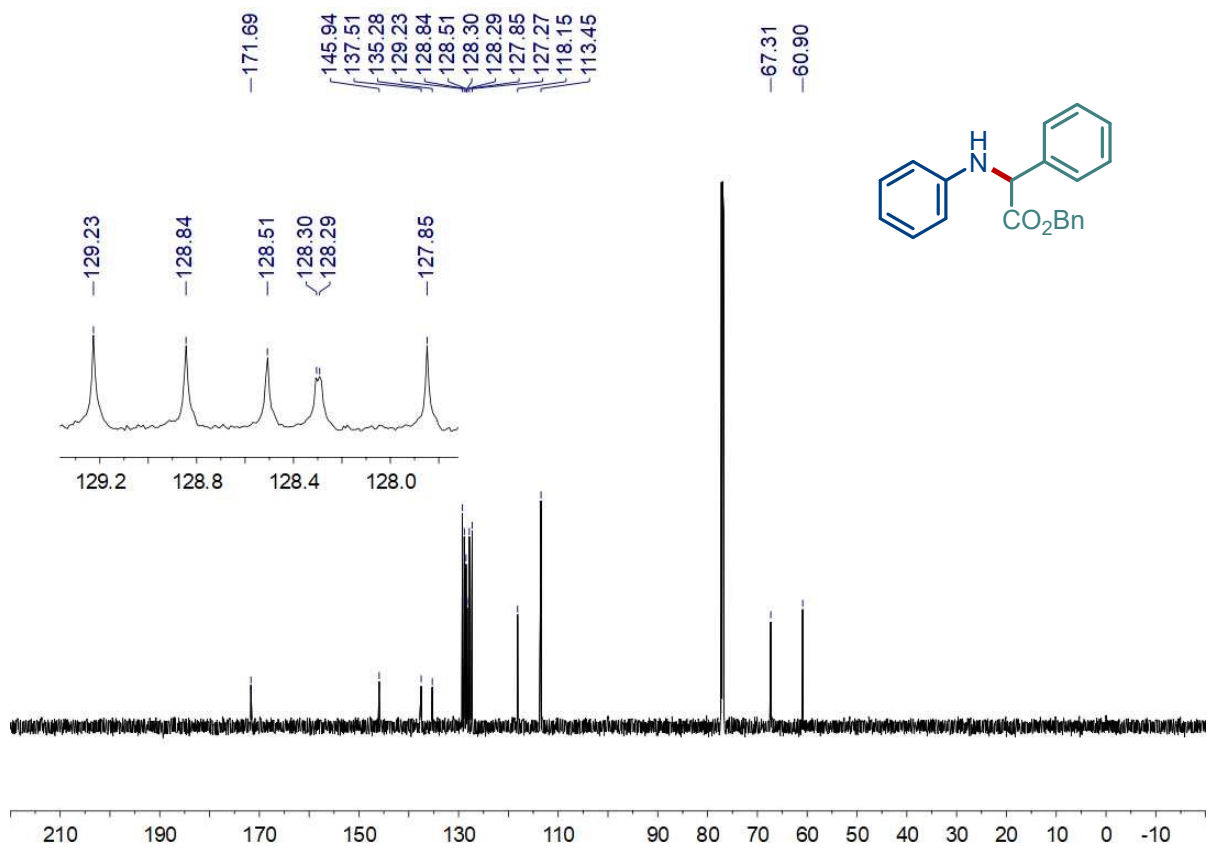



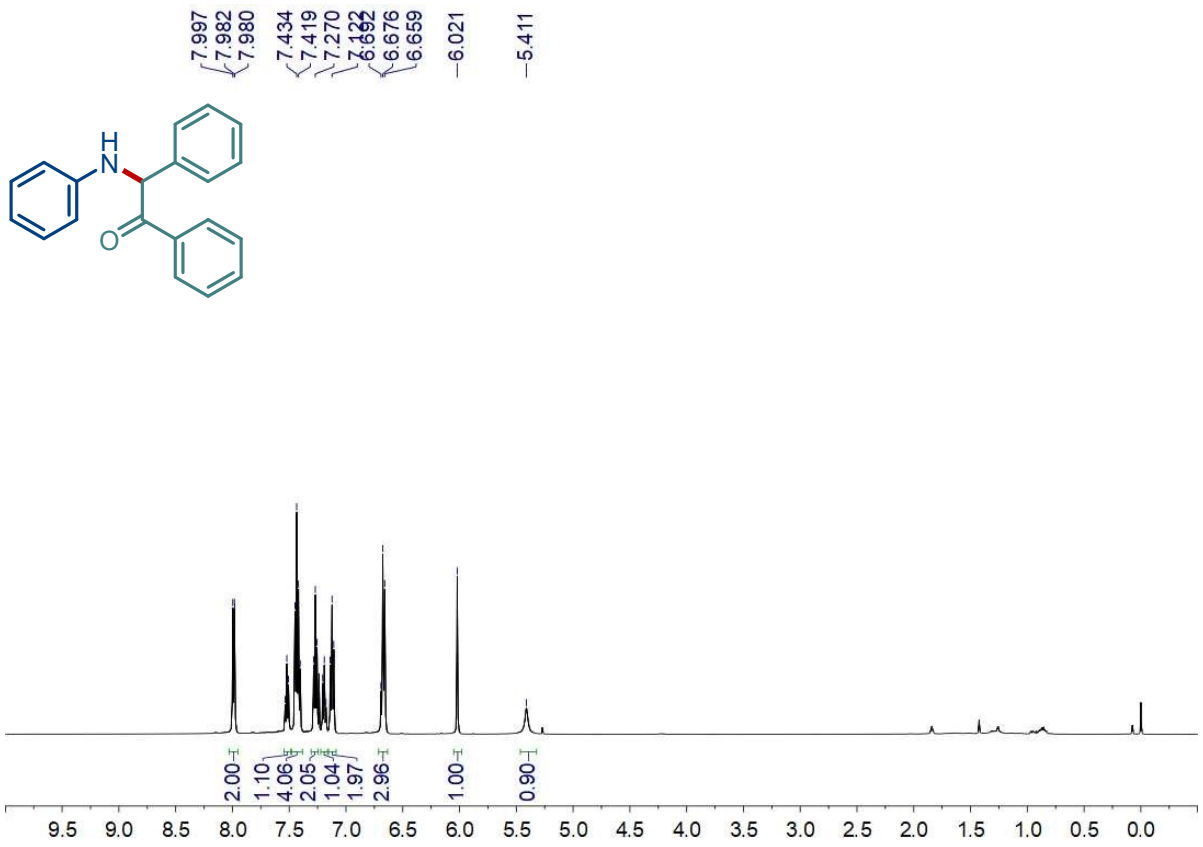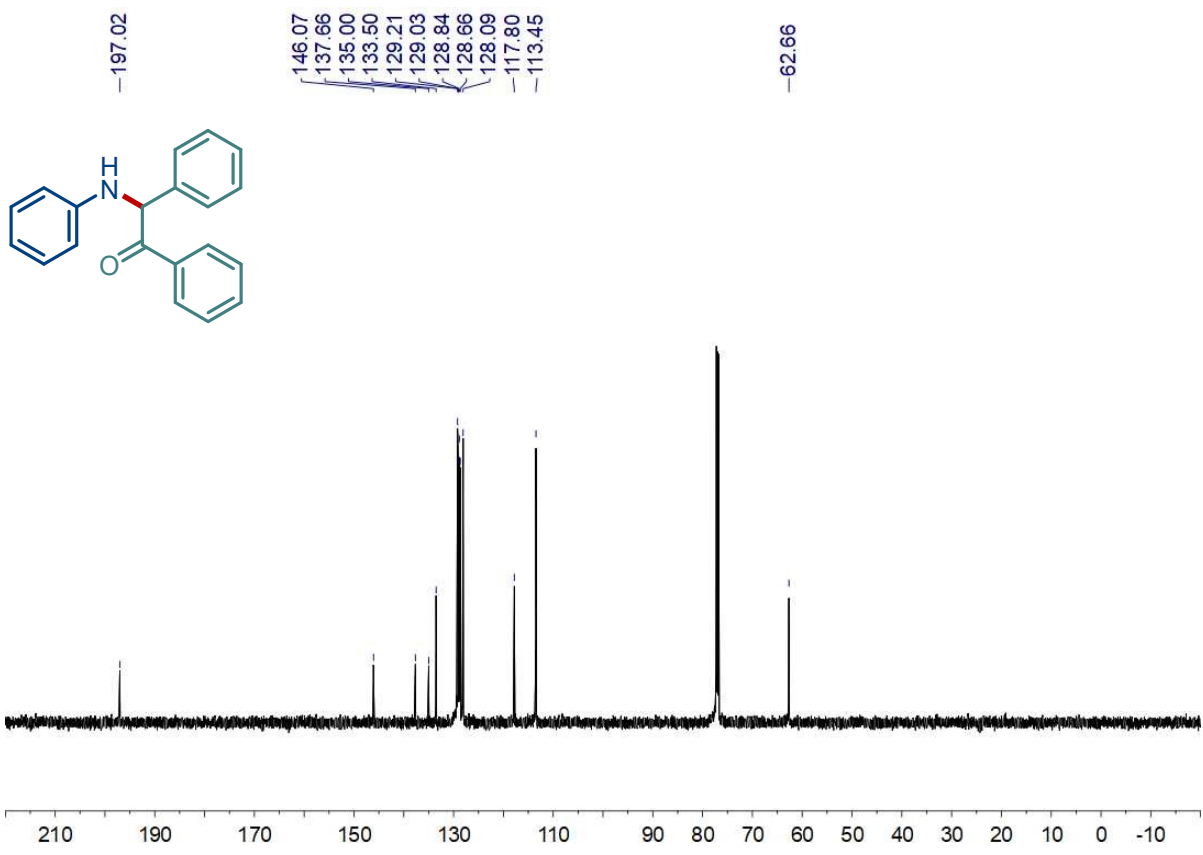

Supplement: d3qo00156c1.pdf [file d3qo00156c1.pdf]
